# Supplementary material for: Pd-catalyzed stereoselective synthesis of chromone C-glycosides
Source: Royal Society of Chemistry journal article supplement (doi:10.1039/d4cc00486h), 2024-01-01

## **Pd-Catalyzed Stereoselective Synthesis of Chromone C-Glycosides**

Manish K. Sharma<sup>[a]</sup>, Bindu Tiwari<sup>[a]</sup> and Nazar Hussain<sup>\*[a]</sup>

---

[a] M. K. Sharma, B. Tiwari, Dr. N. Hussain  
Department of Medicinal Chemistry  
Institute of Medical Sciences  
Banaras Hindu University, Varanasi-221005  
E-mail: [nazar.hussain10@gmail.com](mailto:nazar.hussain10@gmail.com), [nazar10@bhu.ac.in](mailto:nazar10@bhu.ac.in)

## Contents

|                                                                             |    |
|-----------------------------------------------------------------------------|----|
| 1. General Information.....                                                 | 3  |
| 2. Starting materials used in the study .....                               | 3  |
| 3. Reaction development.....                                                | 5  |
| 3a. Random optimization .....                                               | 5  |
| 3b. Study with tri-O-acetyl D-glucal .....                                  | 6  |
| 3c. Screening of Catalyst.....                                              | 6  |
| 3d. Screening of bases .....                                                | 7  |
| 3e. Screening of ligands .....                                              | 7  |
| 3f. Screening of Solvent.....                                               | 8  |
| 3g. Screening of reaction environment.....                                  | 9  |
| 4. General procedures .....                                                 | 9  |
| 4a. Preparation of 3-iodochromones <sup>[2,3]</sup> .....                   | 9  |
| 4b. Preparation of starting material of biologically active molecules ..... | 10 |
| 4c. Preparation of chromones C-glycosides .....                             | 10 |
| 4d. Time profile of Pd(OAc) <sub>2</sub> catalyzed condition.....           | 11 |
| 5. 2D-NMR analysis .....                                                    | 12 |
| 5a. HSQC analysis of compound 3a.....                                       | 12 |
| 5b. COSY Correlations of 3a.....                                            | 12 |
| 5c. NOESY correlation analysis of compound 3a.....                          | 13 |
| 6. Characterization data of starting materials and products.....            | 13 |
| 7. NMR spectrum of compounds.....                                           | 27 |

## 1. General Information

All reagents were used as received from commercial vendors without further purification if not stated otherwise. Thin layer chromatography (TLC) was performed on Merck Kieselgel 60 F254 aluminium plates with unmodified silica and visualized either under UV light or stained with 5%  $\text{H}_2\text{SO}_4$  in MeOH. The products were purified by column chromatography on silica gel (100-200 mesh) using petroleum ether–ethyl acetate as the eluent to obtain the pure products.  $^1\text{H}$  and  $^{13}\text{C}$  NMR spectra were recorded using Avance Neo 500/600 MHz spectrometers with TMS as internal standards. Chemical shifts are expressed in parts per million ( $\delta$  ppm). All product's exact masses were derived using HRMS having a QTOF analyzer. Reagents used were mostly purchased from Sigma Aldrich, TCI, and SRL

## 2. Starting materials used in the study<sup>1</sup>

### Starting material of glycals<sup>1</sup>

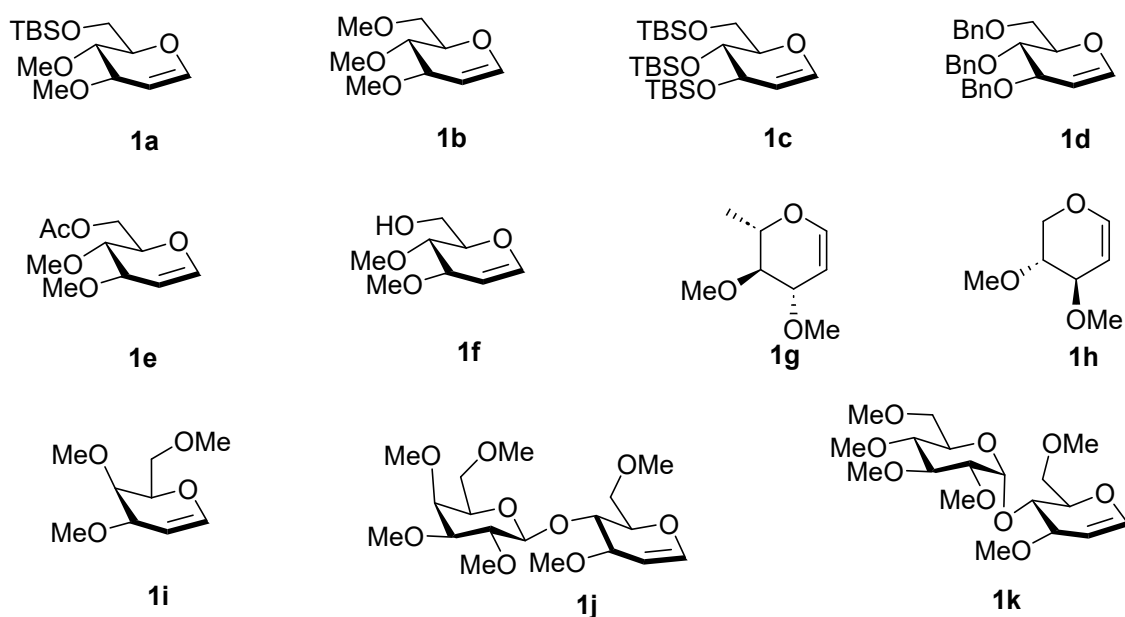

## Starting material of chromones<sup>2,3</sup>

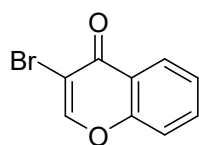

**2a**

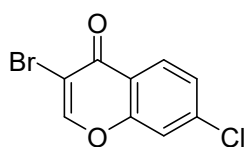

**2b**

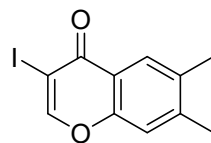

**2c**

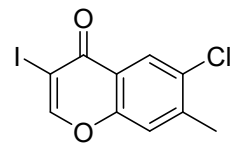

**2d**

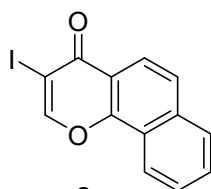

**2e**

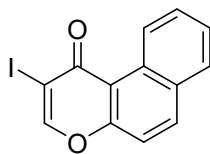

**2f**

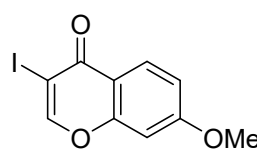

**2g**

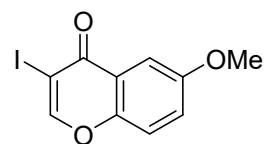

**2h**

## Starting material for biologically active acids

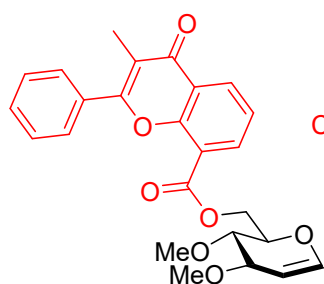

**4a**

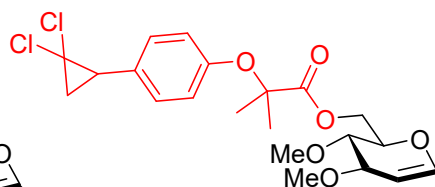

**4b**

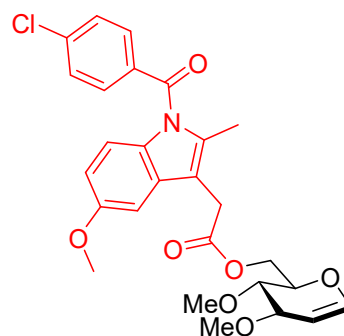

**4c**

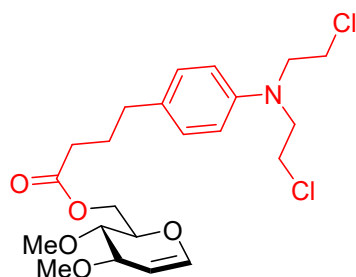

**4d**

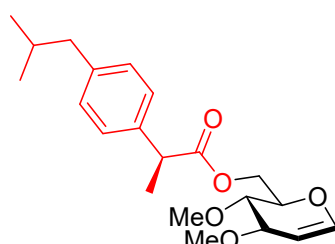

**4e**

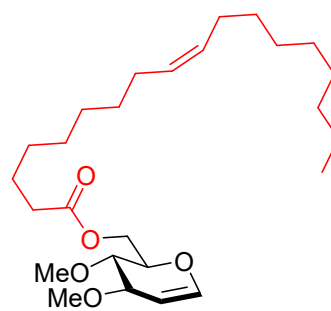

**4f**

### 3. Reaction development

#### 3a. Random optimization

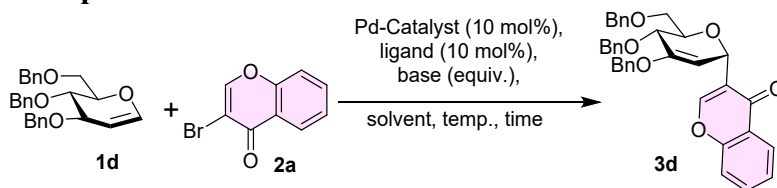

| Entry | Pd-Source<br>(10 mol%)                              | Ligand<br>(10 mol%) | Base/additive<br>(equiv.)                                        | solvent                            | temperature<br>and time | Yield<br>(%) |
|-------|-----------------------------------------------------|---------------------|------------------------------------------------------------------|------------------------------------|-------------------------|--------------|
| 1.    | Pd(OAc) <sub>2</sub>                                | PPh <sub>3</sub>    | AgOAc (2)                                                        | DMF                                | 80 °C and 24 h          | 0            |
| 2.    | Pd(OAc) <sub>2</sub>                                | -                   | TBAB (1),<br>K <sub>2</sub> CO <sub>3</sub> (3)                  | DMF                                | 100 °C and 24 h         | 0            |
| 3.    | Pd(OAc) <sub>2</sub>                                | -                   | Ag <sub>2</sub> CO <sub>3</sub> (2),<br>Cu(OAc) <sub>2</sub> (2) | AcOH                               | 100 °C and 24 h         | 0            |
| 4.    | Pd(OAc) <sub>2</sub>                                | -                   | AgOAc                                                            | DMF:DM<br>SO (20:1)                | 80 °C and 24 h          | 0            |
| 5.    | Pd(dba) <sub>2</sub>                                | PCy <sub>3</sub>    | K <sub>2</sub> CO <sub>3</sub> (3)                               | Dioxane:<br>H <sub>2</sub> O (7:3) | 50 °C and 24 h          | 0            |
| 6.    | Pd(TFA) <sub>2</sub>                                | PPh <sub>3</sub>    | AgOAc                                                            | DMF                                | 80 °C and 24 h          | 0            |
| 7.    | Pd(dba) <sub>2</sub>                                | XantPhos            | K <sub>2</sub> CO <sub>3</sub> (2)                               | toluene                            | 80 °C and 48 h          | 52           |
| 8.    | Pd(dba) <sub>3</sub>                                | XantPhos            | K <sub>2</sub> CO <sub>3</sub> (2)                               | toluene                            | 80 °C and 48 h          | 40           |
| 9.    | Pd(dba) <sub>2</sub>                                | XantPhos            | Cs <sub>2</sub> CO <sub>3</sub> (2)                              | toluene                            | 80 °C and 48 h          | trace        |
| 10.   | Pd(dba) <sub>2</sub>                                | XantPhos            | AgOAc (2)                                                        | toluene                            | 80 °C and 48 h          | 0            |
| 11.   | Pd(dba) <sub>2</sub>                                | X-Phos              | Cs <sub>2</sub> CO <sub>3</sub> (2)                              | toluene                            | 80 °C and 48 h          | 0            |
| 12.   | Pd(dba) <sub>2</sub>                                | dppf                | K <sub>2</sub> CO <sub>3</sub> (2)                               | toluene                            | 80 °C and 48 h          | 13           |
| 13.   | Pd(dba) <sub>2</sub>                                | XantPhos            | K <sub>2</sub> CO <sub>3</sub> (2)                               | toluene +<br>100 µL water          | 80 °C and 48 h          | 37           |
| 14.   | Pd(dba) <sub>2</sub>                                | XantPhos            | K <sub>2</sub> CO <sub>3</sub> (2)                               | DCE                                | 80 °C and 48 h          | 48           |
| 15.   | Pd(CH <sub>3</sub> CN) <sub>2</sub> Cl <sub>2</sub> | XantPhos            | K <sub>2</sub> CO <sub>3</sub> (2)                               | DCE                                | 80 °C and 48 h          | 20           |
| 16.   | Pd(dba) <sub>2</sub>                                | XantPhos            | K <sub>2</sub> CO <sub>3</sub> (2)                               | DME                                | 80 °C and 48 h          | 33           |
| 17.   | Pd(OAc) <sub>2</sub>                                | XantPhos            | K <sub>2</sub> CO <sub>3</sub> (2)                               | DME                                | 85 °C and 48 h          | 38           |
| 18.   | Pd(OAc) <sub>2</sub>                                | XantPhos            | K <sub>2</sub> CO <sub>3</sub> (2)                               | DCE                                | 85 °C and 48 h          | 57           |
| 19.   | Pd(OAc) <sub>2</sub>                                | XantPhos            | K <sub>2</sub> CO <sub>3</sub> (2)                               | DCM                                | 80 °C and 48 h          | 43           |
| 20.   | Pd(OAc) <sub>2</sub>                                | 1,10-phenanthroline | K <sub>2</sub> CO <sub>3</sub> (2)                               | DCE                                | 80 °C and 48 h          | 22           |
| 21.   | Pd(OAc) <sub>2</sub>                                | XantPhos            | Cs <sub>2</sub> CO <sub>3</sub> (2)                              | DCE                                | 80 °C and 48 h          | trace        |
| 22.   | Pd(OAc) <sub>2</sub>                                | XantPhos            | K <sub>2</sub> CO <sub>3</sub> (2)                               | toluene                            | 90 °C and 48 h          | 58           |

|     |                      |               |                                    |         |                |       |
|-----|----------------------|---------------|------------------------------------|---------|----------------|-------|
| 23. | Pd(OAc) <sub>2</sub> | XantPhos      | Na <sub>2</sub> CO <sub>3</sub>    | toluene | 90 °C and 48 h | 32    |
| 24. | Pd(OAc) <sub>2</sub> | 2,2-bipyridyl | K <sub>2</sub> CO <sub>3</sub> (2) | toluene | 90 °C and 48 h | trace |
| 25. | Pd(OAc) <sub>2</sub> | R-BINAP       | K <sub>2</sub> CO <sub>3</sub> (2) | toluene | 90 °C and 48 h | 43    |
| 26. | Pd(OAc) <sub>2</sub> | S-BINAP       | K <sub>2</sub> CO <sub>3</sub> (2) | toluene | 90 °C and 48 h | 45    |
| 27. | Pd(OAc) <sub>2</sub> | XantPhos      | K <sub>2</sub> CO <sub>3</sub> (2) | THF     | 90 °C and 48 h | 48    |
| 28. | Pd(OAc) <sub>2</sub> | XantPhos      | K <sub>2</sub> CO <sub>3</sub> (2) | Xylene  | 90 °C and 48 h | 53    |
| 29. | Pd(OAc) <sub>2</sub> | XantPhos      | K <sub>3</sub> PO <sub>4</sub> (2) | toluene | 90 °C and 48 h | 58    |
| 30. | Pd(OAc) <sub>2</sub> | -             | K <sub>2</sub> CO <sub>3</sub> (2) | toluene | 90 °C and 48 h | 32    |

<sup>[a]</sup>Reaction conditions, unless otherwise stated: **1c** (1 equiv.), **2a** (1.2 equiv.), Pd-source (10 mol%), Ligand (10 mol%), base (2 equiv.), in solvent 1 mL (0.025M). <sup>[b]</sup>Yields are the purified products after column chromatography.

### 3b. Study with tri-*O*-acetyl-D-glucal

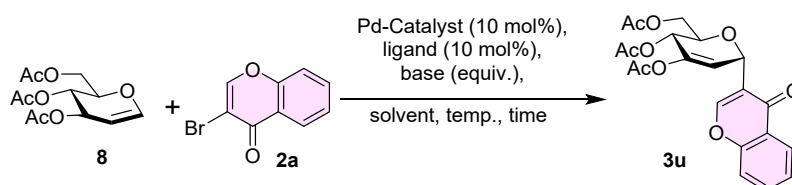

| Entry | Pd-Source (10 mol%)         | Ligand (mol%)    | Base/additive (equiv.)              | solvent | temperature and time | Yield (%) |
|-------|-----------------------------|------------------|-------------------------------------|---------|----------------------|-----------|
| 1.    | Pd(OAc) <sub>2</sub>        | PPh <sub>3</sub> | AgOAc (2)                           | DMF     | 80 °C and 24 h       | 0         |
| 2.    | Pd(TFA) <sub>2</sub>        | PPh <sub>3</sub> | AgOAc (2)                           | DMF     | 80 °C and 24 h       | 0         |
| 3.    | Pd(dba) <sub>2</sub>        | XantPhos         | K <sub>2</sub> CO <sub>3</sub> (2)  | toluene | 90 °C and 24 h       | 0         |
| 4.    | Pd(OAc) <sub>2</sub>        | XantPhos         | K <sub>2</sub> CO <sub>3</sub> (2)  | toluene | 90 °C and 24 h       | 0         |
| 5.    | Ni(dppf)Cl <sub>2</sub> (5) | PPh <sub>3</sub> | Cs <sub>2</sub> CO <sub>3</sub> (2) | DMF     | 90 °C and 24 h       | 0         |
| 6.    | Pd(OAc) <sub>2</sub>        | PCy <sub>3</sub> | K <sub>3</sub> PO <sub>4</sub>      | toluene | 90 °C and 30 h       | 0         |
| 7.    | Pd(OAc) <sub>2</sub>        | XantPhos         | K <sub>3</sub> PO <sub>4</sub>      | toluene | 90 °C and 30 h       | 0         |

<sup>[a]</sup>Reaction conditions, unless otherwise stated: **8** (1 equiv.), **2a** (1.2 equiv.), Pd-source (10 mol%), Ligand (10 mol%), base (2 equiv.), in solvent 1 mL, (0.035M). <sup>[b]</sup>Yields are the purified products after column chromatography.

### 3c. Screening of Catalyst

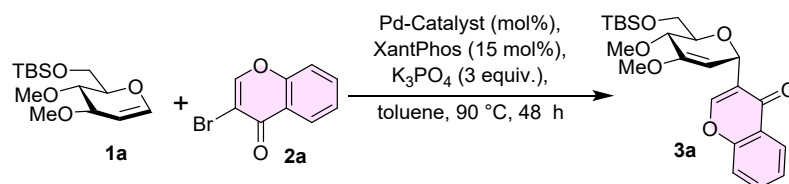

| Entry | Catalyst (mol%)     | Yield (%) |
|-------|---------------------|-----------|
| 1.    | $Pd(dba)_2$ (10)    | 38        |
| 2.    | $Pd(dba)_3$ (10)    | 51        |
| 3.    | $Pd(CN)_2Cl_2$ (10) | 25        |
| 4.    | $Pd(OAc)_2$ (5)     | 47        |
| 5.    | $Pd(OAc)_2$ (10)    | 68        |
| 6.    | $Pd(OAc)_2$ (15)    | 65        |
| 7.    | $PdCl_2$ (10)       | 52        |
| 8.    | $Pd(TFA)_2$ (10)    | 56        |
| 9.    | $Pd(PPh_3)_4$ (10)  | 43        |
| 10.   | $Pd(dppf)Cl_2$ (10) | 17        |

<sup>[a]</sup>Reaction conditions, unless otherwise stated: **1a** (1 equiv.), **2a** (1.2 equiv.), Ligand (15 mol%), base (3 equiv.), in solvent 1 mL, (0.035M), 90 °C for 48 h. <sup>[b]</sup>Yields are the purified products after column chromatography.

### 3d. Screening of bases

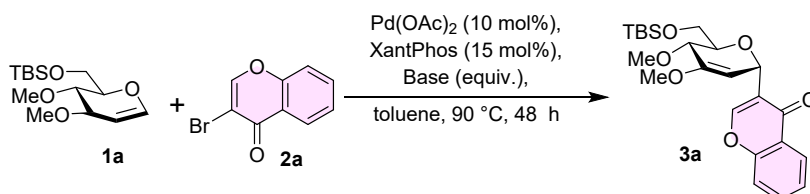

| Entry | Base (equiv.)  | Yield (%) |
|-------|----------------|-----------|
| 1.    | $K_2CO_3$ (3)  | 64        |
| 2.    | $K_3PO_4$ (2)  | 51        |
| 3.    | $K_3PO_4$ (3)  | 68        |
| 4.    | $K_3PO_4$ (4)  | 63        |
| 5.    | $Et_3N$ (3)    | 10        |
| 6.    | $NaOMe$ (3)    | 38        |
| 7.    | $NaHCO_3$ (3)  | 46        |
| 8.    | $KOH$ (3)      | 0         |
| 9.    | $DIPEA$ (3)    | 28        |
| 10.   | $Na_2CO_3$ (3) | 32        |
| 11.   | $Cs_2CO_3$ (3) | 20        |

<sup>[a]</sup>Reaction conditions, unless otherwise stated: **1a** (1 equiv.), **2a** (1.2 equiv.), Ligand (15 mol%) in solvent 1 mL, (0.035M), 90 °C for 48h. <sup>[b]</sup>Yields are the purified products after column chromatography.

### 3e. Screening of ligands

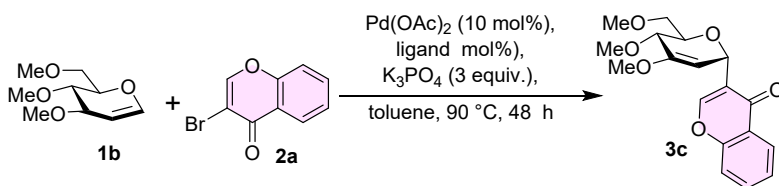

| Entry | ligand                   | Yield (%) |
|-------|--------------------------|-----------|
| 1.    | $\text{PPh}_3$ (15)      | 47        |
| 2.    | XantPhos (5)             | 31        |
| 3.    | XantPhos (10)            | 52        |
| 4.    | XantPhos (15)            | 68        |
| 5.    | XantPhos (20)            | 64        |
| 6.    | $\text{PCy}_3$ (15)      | 65        |
| 7.    | R-BINAP (15)             | 39        |
| 8.    | S-BINAP (15)             | 36        |
| 9.    | X-Phos (15)              | 27        |
| 10.   | Ligand free (15)         | trace     |
| 11.   | 1,10-phenanthroline (15) | 10        |
| 12.   | 2,2-bipyridyl (15)       | trace     |

<sup>[a]</sup>Reaction conditions, unless otherwise stated: **1a** (1 equiv.), **2a** (1.2 equiv.) in solvent 1 mL, (0.05M), 90 °C for 48 h. <sup>[b]</sup>Yields are the purified products after column chromatography.

### 3f. Screening of Solvent

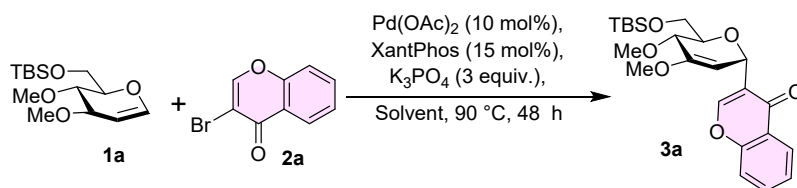

| Entry | Base    | Yield (%) |
|-------|---------|-----------|
| 1.    | toluene | 68        |
| 2.    | DCE     | 65        |
| 3.    | Xylene  | 59        |
| 4.    | DMF     | 0         |
| 5.    | THF     | 47        |
| 6.    | ACN     | 0         |
| 7.    | DME     | 39        |
| 8.    | DCM     | 43        |

<sup>[a]</sup>Reaction conditions, unless otherwise stated: **1a** (1 equiv.), **2a** (1.2 equiv.), Ligand (15 mol%), base (3 equiv.), in solvent 1 mL, (0.035M), 90 °C for 48 h. <sup>[b]</sup>Yields are the purified products after column chromatography.



### Screening of solvent concentration\*

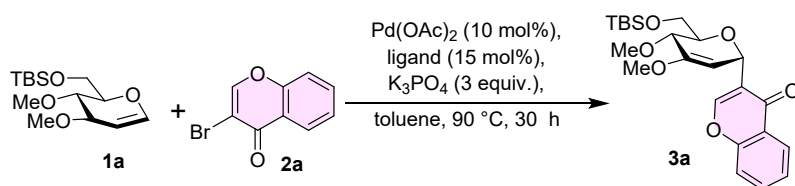

| Entry | Concentration (M) | Yield (%) |
|-------|-------------------|-----------|
| 1.    | toluene (0.2)     | 53        |
| 2.    | toluene (0.15)    | 73        |
| 3.    | toluene (0.1)     | 78        |
| 4.    | toluene (0.08)    | 75        |
| 5.    | toluene (0.05)    | 71        |
| 6.    | toluene (0.03)    | 65        |
| 7.    | toluene (0.01)    | 48        |

\*All the reactions were quenched after 30 h

### 3g. Screening of reaction environment

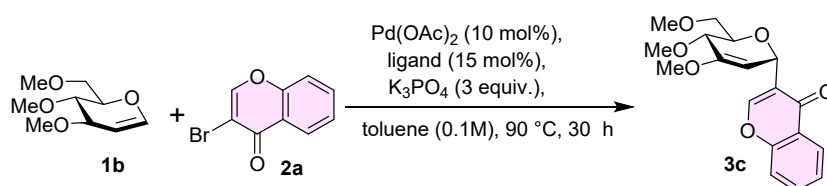

| Entry | Base                                                | Yield (%) |
|-------|-----------------------------------------------------|-----------|
| 1.    | Seal Tube                                           | 69        |
| 2.    | Open air                                            | 73        |
| 3.    | Inert atmosphere                                    | 62        |
| 4.    | Installed in open air and capped with glass stopper | 78        |

## 4. General procedures

### 4a. Preparation of 3-iodochromones<sup>2,3</sup>

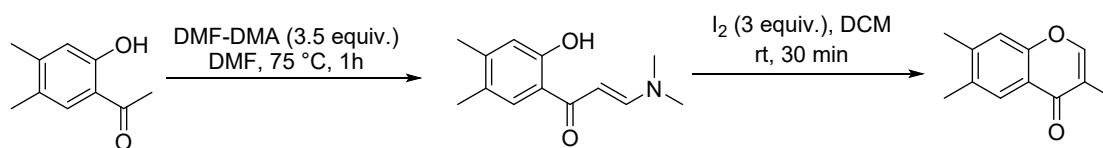

A solution of 3,4-dimethyl-*o*-acetophenols (3.05 mmol, 500 mg) and *N,N*-dimethylformamide dimethyl acetal (DMF-DMA) (10.7 mmol, 3.5 equiv.) in *N,N*-dimethylformamide (DMF, 10 mL) was stirred at 75 °C for 45 min. After the mixture was cooled to room temperature, saturated brine (100 mL) was added and an orange precipitate appeared, which was filtered and dried to afford the corresponding 3-(dimethylamino)-1-(2-hydroxyphenyl)prop-2-en-1-ones. Then iodine (9.2 mmol, 3.0 equiv.) and 3-(dimethylamino)-1-(2-hydroxyphenyl)prop-2-en-1-ones were dissolved in 15 mL of DCM and the mixture was stirred at room temperature for 30 min. All reactions were monitored by TLC (thin layer chromatography). The solution of 5% NaHSO<sub>3</sub> was poured into the reaction mixture to quench I<sub>2</sub> and the mixture was stirred until the solution turned yellow. The organic phase was washed neutrally with 5% aq. NaHCO<sub>3</sub> (3 × 25 mL), dried over anhydrous Na<sub>2</sub>SO<sub>4</sub>, filtered and concentrated by rotary evaporation, and recrystallized from anhydrous EtOH to give the corresponding 3-iodochromones **2c-h**.

### 4b. Preparation of starting material of biologically active molecules

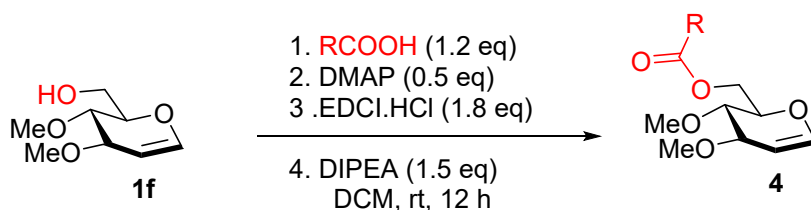

In an oven-dried round bottom flask, dimethyl protected glucal **1f** (0.29 mmol, 1 equiv.), were dissolved in DCM at room temperature, and acid (0.35 mmol, 1.2 equiv.) was added. DMAP (0.14 mmol, 50 mol%) and EDCI.HCl (0.52 mmol, 1.8 equiv.) and DIPEA (0.43 mmol, 1.5 equiv.) were added sequentially and the reaction mixture was stirred at room temperature for 12 h. After the starting material was converted as confirmed through TLC, the reaction mixture was quenched with 1N HCl (10 mL), and the organic layer was extracted with DCM (10 × 2 mL). The organic layer was dried over sodium sulfate and the residue left was purified by column chromatography over silica gel (100-200 mesh) using hexane/ethyl acetate as eluent.

#### 4c. Preparation of chromones C-glycosides

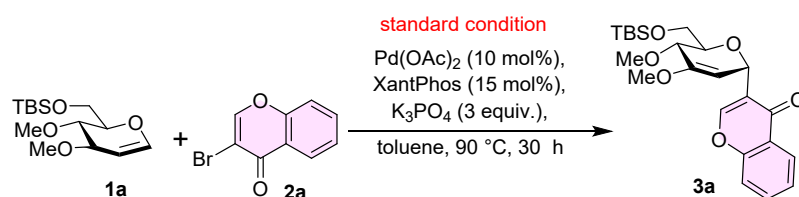

In an oven-dried round bottom flask glycal **1a** (0.10 mmol, 1 equiv.),  $\text{Pd}(\text{OAc})_2$  (0.01 mmol, 0.1 equiv.), Xantphos (0.015 mmol, 0.15 equiv.),  $\text{K}_3\text{PO}_4$  (0.31 mmol, 3 equiv.) and 3-bromo chromone (0.13 mmol, 1.2 equiv.) were added successively and dissolved in 1.04 mL, (0.1M) of toluene at room temperature. Finally, the round bottom flask was capped with the glass stopper and reaction mixture was stirred at preheated silicon oil bath for 30 h at 90 °C. After the starting material was converted as confirmed through TLC, the mixture was cooled at room temperature, diluted with ethyl acetate (10 mL $\times$ 2), and passed through the celite. The reaction mixture was washed with brine solution (10 mL) and the organic layer was dried over sodium sulfate and the residue left was purified by column chromatography over silica gel (100-200 mesh) using hexane/ethyl acetate as eluent.

#### 4d. Time profile of $\text{Pd}(\text{OAc})_2$ catalyzed condition

In an oven-dried round bottom flask glycal **1b** (47 mg, 0.25 mmol, 1 equiv.),  $\text{Pd}(\text{OAc})_2$  (0.025 mmol, 0.1 equiv.), Xantphos (0.0375 mmol, 0.15 equiv.),  $\text{K}_3\text{PO}_4$  (0.75 mmol, 3 equiv.) and 3-bromo chromone (0.3 mmol, 1.2 equiv.) were added successively and dissolved in 2.5 mL, (0.1M) of toluene at room temperature. Finally, the round bottom flask was capped with the glass stopper and reaction mixture was stirred at preheated silicon oil bath at 90 °C. The conversion of **1b** into **3c** was monitored by  $^1\text{H}$  NMR spectroscopy. A 400  $\mu\text{L}$  aliquot was taken from the reaction solution. The aliquots were concentrated under reduced pressure, dissolved in  $\text{CDCl}_3$  and internal standard (dibromomethane 0.50 mmol, 2 equiv.), and analyzed by  $^1\text{H}$  NMR spectroscopy.

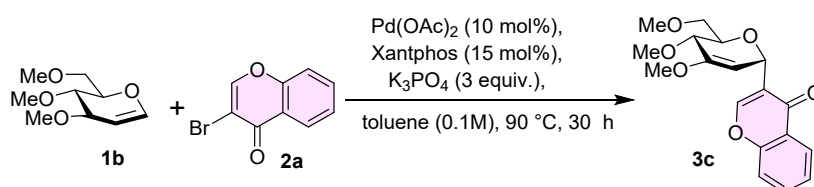

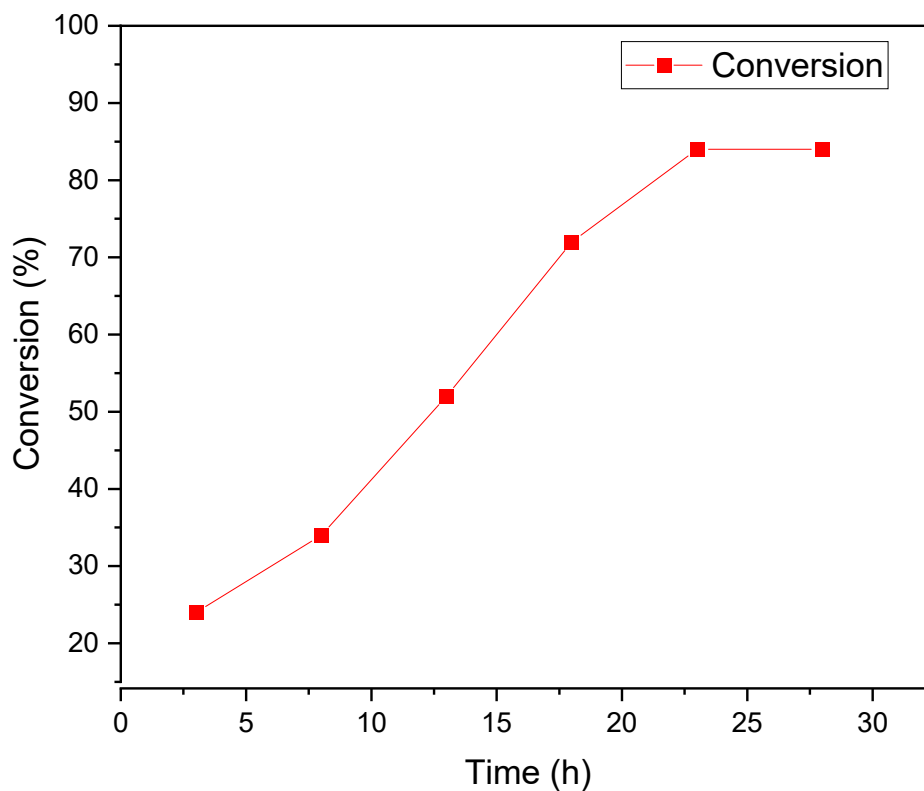

**Fig. S1** Time profile of Pd(OAc)<sub>2</sub> catalyzed reaction

## 5. 2D-NMR analysis

### 5a. HSQC analysis of compound 3a

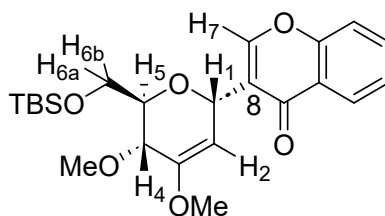

**Fig. S2** HSQC analysis of compound 3a

**Table S1** HSQC analysis

|                         | <sup>1</sup> H                  | <sup>13</sup> C |
|-------------------------|---------------------------------|-----------------|
| H-1/C-1                 | 5.50 (s, 1H)                    | 65.9            |
| H-2/C-2                 | 5.03 (s, 1H)                    | 96.4            |
| C-3                     |                                 | 151.1           |
| H-4/C-4                 | 3.65 (s, 1H)                    | 72.3            |
| H-5/C-5                 | 4.04 (d, <i>J</i> = 5.8 Hz, 1H) | 74.7            |
| H-6 <sub>a,b</sub> /C-6 | 3.78 – 3.72 (m, 2H),            | 61.4            |
| H-7/C-7                 | 8.07                            | 153.4           |
| C-8                     |                                 | 125.0           |

## 5b. COSY Correlations of 3a

**Table S2** COSY analysis

|                    | <sup>1</sup> H             | <sup>1</sup> H                                 |
|--------------------|----------------------------|------------------------------------------------|
| H-1                | 5.50 (s, 1H)               | 5.03 (s, 1H, H-2)                              |
| H-2                | 5.03 (s, 1H)               | 5.50 (s, 1H, H-1)                              |
| H-4                | 3.65 (s, 1H)               | 4.04 (d, $J = 5.8$ Hz, 1H, H-5)                |
| H-5                | 4.04 (d, $J = 5.8$ Hz, 1H) | 3.65 (s, 1H, H-4) and 3.78 – 3.72 (m, 2H, H-6) |
| H-6 <sub>a,b</sub> | 3.78 – 3.72 (m, 2H),       | 4.04 (d, $J = 5.8$ Hz, 1H, H-5)                |

## 5c. NOESY correlation analysis of compound 3a

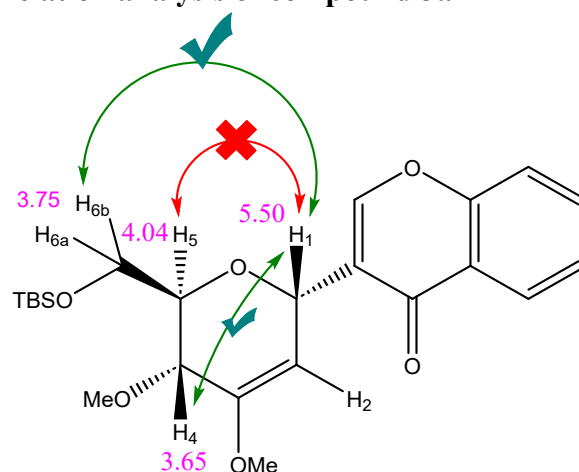

**Fig. S3** NOESY correlation analysis

## 6. Characterization data of starting materials and products

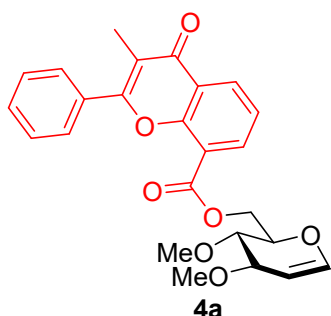

The compound **4a** was synthesized according to the general procedure **4b** and isolated through column chromatography on silica gel.  $R_f = 0.45$  (30%, n-hexane/ ethyl acetate), eluent 18% (n-hexane/ethyl acetate), pale yellow solid (104.0 mg, 83%).

<sup>1</sup>H NMR (600 MHz, CDCl<sub>3</sub>)  $\delta$  8.40 (d,  $J = 7.9$  Hz, 1H), 8.21 (d,  $J = 7.5$  Hz, 1H), 7.74 (d,  $J = 7.1$  Hz, 2H), 7.45 (t,  $J = 6.8$  Hz, 3H), 7.38 (t,  $J = 7.6$  Hz, 1H), 6.26 (d,  $J = 6.1$  Hz, 1H), 4.87 – 4.80 (m, 1H), 4.55 (dt,  $J = 12.0, 9.4$  Hz, 2H), 4.12 (t,  $J = 7.0$  Hz, 1H), 3.80 (s, 1H), 3.43 (s, 3H), 3.37 (t,  $J = 6.6$  Hz, 1H), 3.33 (s, 3H), 2.17 (s, 3H).

**<sup>13</sup>C NMR (151 MHz, CDCl<sub>3</sub>)** δ 178.3, 164.1, 161.1, 154.5, 144.2, 136.2, 133.0, 131.0, 130.5, 129.4 (2C), 128.5 (2C), 124.0, 123.3, 120.3, 117.7, 99.5, 76.1, 75.9, 74.6, 63.9, 59.2, 55.9, 11.8.

**HRMS (ESI)** calcd for [C<sub>25</sub>H<sub>24</sub>O<sub>7</sub>+H]<sup>+</sup> 437.1595, found 437.1599.

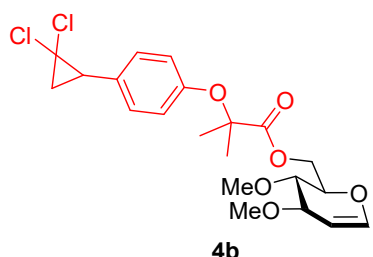

The compound **4b** was synthesized according to the general procedure **4b** and isolated through column chromatography on silica gel. *R<sub>f</sub>* = 0.57 (20%, n-hexane/ ethyl acetate), eluent 10% (n-hexane/ethyl acetate), pale yellow gummy (111.0 mg, 87%).

**<sup>1</sup>H NMR (600 MHz, CDCl<sub>3</sub>)** δ 7.03 (d, *J* = 7.8 Hz, 2H), 6.77 (d, *J* = 7.6 Hz, 2H), 6.24 (d, *J* = 6.0 Hz, 1H), 4.80 – 4.74 (m,

1H), 4.43 (d, *J* = 11.9 Hz, 1H), 4.33 (dd, *J* = 11.9, 5.5 Hz, 1H), 3.95 (t, *J* = 6.6 Hz, 1H), 3.77 (s, 1H), 3.36 (s, 3H), 3.30 (s, 3H), 3.28 (s, 1H, *bs*), 2.75 (t, *J* = 9.4 Hz, 1H), 1.89 – 1.83 (m, 1H), 1.69 (t, *J* = 7.8 Hz, 1H), 1.54 (s, 6H).

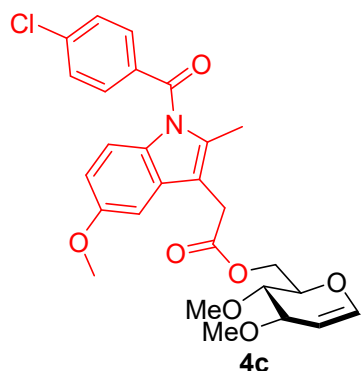

**<sup>13</sup>C NMR (151 MHz, CDCl<sub>3</sub>)** δ 174.0, 154.9, 144.2, 129.6 (2C), 118.9 (2C), 99.6, 79.2, 76.2, 75.7, 74.6, 63.2, 60.9, 59.2, 55.8, 34.8, 25.9, 25.6, 25.3.

**HRMS (ESI)** calculated for [C<sub>21</sub>H<sub>26</sub>Cl<sub>2</sub>O<sub>6</sub>+Na]<sup>+</sup> 467.0999, found 467.1015

The compound **4c** was synthesized according to the general procedure **4b** and isolated through column chromatography on silica gel. *R<sub>f</sub>* = 0.63 (30%, n-hexane/ ethyl acetate), eluent 12% (n-hexane/ethyl acetate), yellow gummy (129.7 mg, 88%).

**<sup>1</sup>H NMR (600 MHz, CDCl<sub>3</sub>)** δ 7.59 (d, *J* = 7.3 Hz, 2H), 7.39 (d, *J* = 7.7 Hz, 2H), 6.90 (s, 1H), 6.79 (d, *J* = 8.9 Hz, 1H), 6.59 (d, *J* = 8.9 Hz, 1H), 6.24 (d, *J* = 6.0 Hz, 1H), 4.78 – 4.76 (m, 1H), 4.34 (d, *J* = 12.1 Hz, 1H), 4.27 (dd, *J* = 12.0, 5.5 Hz, 1H), 3.93 (t, *J* = 6.7 Hz, 1H), 3.76 (s, 4H), 3.64 (s, 2H), 3.30 (s, 3H), 3.27 (s, 3H), 3.20 (t, *J* = 6.9 Hz, 1H), 2.31 (s, 3H).

**<sup>13</sup>C NMR (151 MHz, CDCl<sub>3</sub>)** δ 169.5, 167.3, 155.1, 143.1, 138.2, 134.9, 132.9, 130.2, 129.8, 129.6, 128.1, 128.1, 113.9, 111.5, 110.8, 100.2, 98.7, 75.2, 74.7, 73.7, 62.0, 58.1, 54.68, 54.7, 29.3, 12.3.

**HRMS (ESI)** calcd for [C<sub>27</sub>H<sub>28</sub>ClNO<sub>7</sub>+Na]<sup>+</sup> 536.1447, found 536.1459

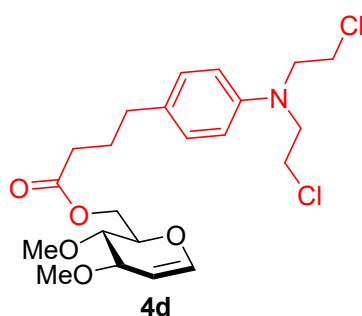

The compound **4d** was synthesized according to the general procedure **4b** and isolated through column chromatography on

silica gel.  $R_f$  = 0.7 (30%, n-hexane/ ethyl acetate), eluent 9% (n-hexane/ethyl acetate), pale yellow gummy (112.1 mg, 85%).

**$^1\text{H}$  NMR (600 MHz,  $\text{CDCl}_3$ )**  $\delta$  7.00 (d,  $J$  = 8.5 Hz, 2H), 6.57 (d,  $J$  = 8.4 Hz, 2H), 6.30 (d,  $J$  = 6.2 Hz, 1H), 4.81 (dd,  $J$  = 6.2, 2.9 Hz, 1H), 4.33 (dd,  $J$  = 12.1, 2.4 Hz, 1H), 4.25 (dd,  $J$  = 12.1, 6.0 Hz, 1H), 4.00 – 3.95 (m, 1H), 3.81 (dd,  $J$  = 5.0, 2.2 Hz, 1H), 3.63 (t,  $J$  = 7.1 Hz, 4H), 3.55 (t,  $J$  = 7.0 Hz, 4H), 3.46 (s, 3H), 3.35 (dd,  $J$  = 6.3, 3.9 Hz, 1H), 3.33 (s, 3H), 2.50 (t,  $J$  = 7.5 Hz, 2H), 2.30 (t,  $J$  = 7.5 Hz, 2H), 1.90 – 1.81 (m, 2H).

**$^{13}\text{C}$  NMR (151 MHz,  $\text{CDCl}_3$ )**  $\delta$  173.3, 144.2, 130.7, 129.8 (2C), 129.7, 112.3 (2C), 99.6, 76.3, 76.0, 74.9, 62.6, 59.3, 55.9, 53.7 (2C), 40.5 (2C), 33.9, 33.5, 26.7.

**HRMS (ESI)** calcd for  $[\text{C}_{22}\text{H}_{31}\text{Cl}_2\text{O}_5 + \text{H}]^+$  460.1652, found 460.1646.

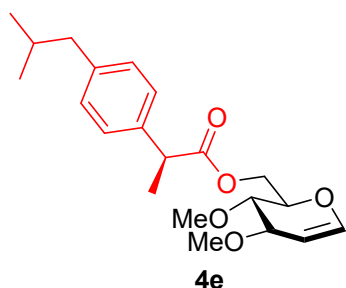

The compound **4e** was synthesized according to the general procedure **4b** and isolated through column chromatography on silica gel.  $R_f$  = 0.63 (30%, n-hexane/ ethyl acetate), eluent 12% (n-hexane/ethyl acetate), pale yellow gummy (94.7 mg, 91%).

**$^1\text{H}$  NMR (600 MHz,  $\text{CDCl}_3$ )**  $\delta$  7.14 (d,  $J$  = 7.3 Hz, 2H), 7.01 (d,  $J$  = 7.3 Hz, 2H), 6.27 (d,  $J$  = 6.0 Hz, 1H), 4.80 – 4.71 (m, 1H), 4.29 (d,  $J$  = 12.1 Hz, 1H), 4.21 (dd,  $J$  = 12.0, 4.2 Hz, 1H), 3.92 – 3.85 (m, 1H), 3.76 (d,  $J$  = 5.4 Hz, 1H), 3.69 (d,  $J$  = 7.0 Hz, 1H), 3.28 (s, 3H), 3.23 (d,  $J$  = 7.3 Hz, 1H), 3.13 (s, 3H), 2.35 (d,  $J$  = 7.0 Hz, 2H), 1.82 – 1.69 (m, 1H), 1.43 (d,  $J$  = 7.1 Hz, 3H), 0.81 (d,  $J$  = 6.4 Hz, 6H).

**$^{13}\text{C}$  NMR (151 MHz,  $\text{CDCl}_3$ )**  $\delta$  173.4, 143.3, 139.6, 136.6, 128.3 (2C), 126.2 (2C), 98.8, 75.9, 74.4, 73.8, 61.5, 58.1, 54.8, 44.0 (2C), 29.2, 21.3 (2C), 17.3.

**HRMS (ESI)** calcd for  $[\text{C}_{21}\text{H}_{30}\text{O}_5 + \text{Na}]^+$  385.1985, found 385.1991.

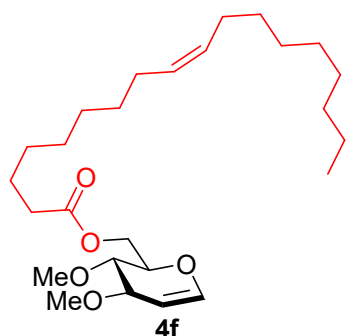

The compound **4f** was synthesized according to the general procedure **4b** and isolated through column chromatography on silica gel.  $R_f$  = 0.73 (10%, n-hexane/ ethyl acetate), eluent 4% (n-hexane/ethyl acetate), pale yellow gummy (105.3 mg, 84%).

**$^1\text{H}$  NMR (600 MHz,  $\text{CDCl}_3$ )**  $\delta$  6.30 (d,  $J$  = 6.0 Hz, 1H), 5.27 (d,  $J$  = 1.3 Hz, 2H), 4.82 – 4.78 (m, 1H), 4.33 (d,  $J$  = 12.1 Hz, 1H), 4.24 (dd,  $J$  = 12.0, 5.8 Hz, 1H), 3.97 (t,  $J$  = 6.7 Hz, 1H), 3.81 (s, 1H, *bs*), 3.46 (s, 3H), 3.35 (s, 1H, *bs*), 3.33 (s, 3H), 2.28 (t,  $J$  = 7.4 Hz, 2H), 1.94 – 1.92 (m, 4H), 1.59 – 1.54 (m, 2H), 1.23 – 1.20 (m, 20H), 0.81 (t,  $J$  = 6.7 Hz, 3H).

**$^{13}\text{C}$  NMR (151 MHz,  $\text{CDCl}_3$ )**  $\delta$  172.6, 143.2, 129.0, 128.7, 98.6, 75.4, 74.9, 73.9, 61.5, 58.3, 54.8, 33.2, 30.9, 28.8, 28.7, 28.5, 28.3 (2C), 28.2, 28.1, 28.1, 26.2, 26.2, 23.9, 21.7, 13.1.

**HRMS (ESI)** calcd for  $[C_{26}H_{46}O_5+Na]^+$  461.3239, found 461.3237.

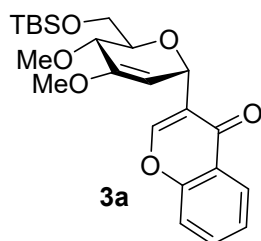

The compound **3a** was synthesized according to the general procedure **4c** and isolated through column chromatography on silica gel.  $R_f$  = 0.57 (20%, n-hexane/ ethyl acetate), eluent 10% (n-hexane/ethyl acetate), pale yellow solid (35.1 mg, 78%).

**$^1H$  NMR (600 MHz,  $CDCl_3$ )**  $\delta$  8.15 (d,  $J$  = 7.8 Hz, 1H), 8.07 (s, 1H), 7.58 (t,  $J$  = 7.7 Hz, 1H), 7.38 (d,  $J$  = 8.4 Hz, 1H), 7.32 (t,  $J$  = 7.5 Hz, 1H), 5.50 (s, 1H), 5.03 (d,  $J$  = 2.2 Hz, 1H), 4.04 (dd,  $J$  = 9.0, 6.2 Hz, 1H), 3.79 – 3.71 (m, 2H), 3.65 (d,  $J$  = 1.8 Hz, 1H), 3.50 (s, 3H), 3.41 (s, 3H), 0.82 (s, 9H), -0.00 (d,  $J$  = 5.5 Hz, 6H).

**$^{13}C$  NMR (151 MHz,  $CDCl_3$ )**  $\delta$  175.7, 155.4, 153.1, 151.0, 132.6, 124.7, 124.0, 123.3, 123.0, 117.2, 96.2, 74.7, 72.4, 64.9, 61.1, 56.9, 53.5, 24.9 (3C), 17.2, -6.4, -6.4.

**HRMS (ESI)** calcd for  $[C_{23}H_{32}O_6Si+H]^+$  433.2041, found 433.2039.

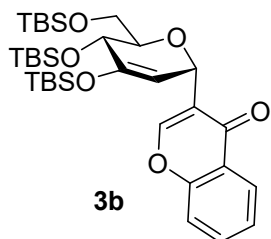

The compound **3b** was synthesized according to the general procedure **4c** and isolated through column chromatography on silica gel.  $R_f$  = 0.65 (10%, n-hexane/ ethyl acetate), eluent 3% (n-hexane/ethyl acetate), colourless gummy (28.36 mg, 73%).

**$^1H$  NMR (600 MHz,  $CDCl_3$ )**  $\delta$  8.15 (d,  $J$  = 7.9 Hz, 1H), 8.11 (s, 1H), 7.58 (t,  $J$  = 7.7 Hz, 1H), 7.39 (d,  $J$  = 8.4 Hz, 1H), 7.32 (t,  $J$  = 7.5 Hz, 1H), 5.46 (s, 1H, *bs*), 5.04 (s, 1H), 3.97 (s, 1H, *bs*), 3.92 (t,  $J$  = 6.4 Hz, 1H), 3.73 (d,  $J$  = 6.8 Hz, 2H), 0.86 (s, 18H), 0.83 (s, 9H), 0.11 (s, 3H), 0.08 (s, 3H), 0.06 (s, 3H), 0.04 (s, 3H), -0.00 (s, 6H).

**$^{13}C$  NMR (151 MHz,  $CDCl_3$ )**  $\delta$  175.5, 155.4, 153.9, 147.3, 132.4, 124.7, 124.0, 123.8, 123.0, 117.2, 103.7, 66.2, 64.4, 61.1, 59.4, 24.9 (6C), 24.8 (3C), 17.3, 17.2, 17.1, -5.1, -5.2 (2C), -5.6, -6.4, -6.5.

**HRMS (ESI)** calcd for  $[C_{33}H_{56}O_6Si_3+H]^+$  633.3457, found 633.3433.

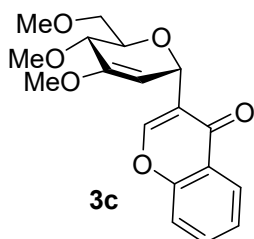

The compound **3c** was synthesized according to the general procedure **4c** and isolated through column chromatography on silica gel.  $R_f$  = 0.45 (30%, n-hexane/ ethyl acetate), eluent 18% (n-hexane/ethyl acetate), brownish gummy (35.5 mg, 67%).

**$^1H$  NMR (600 MHz,  $CDCl_3$ )**  $\delta$  8.23 (dd,  $J$  = 8.0, 1.5 Hz, 1H), 8.15 (d,  $J$  = 0.9 Hz, 1H), 7.67 (ddd,  $J$  = 8.6, 7.2, 1.6 Hz, 1H), 7.46 (d,  $J$  = 8.4 Hz, 1H), 7.44 – 7.37 (m,



1H), 5.73 – 5.42 (m, 1H), 5.11 (d,  $J = 2.7$  Hz, 1H), 4.31 – 4.17 (m, 1H), 3.69 – 3.63 (m, 2H), 3.58 (s, 3H), 3.54 (dd,  $J = 11.0, 6.2$  Hz, 1H), 3.51 (s, 3H), 3.41 (s, 3H).

**$^{13}\text{C}$  NMR (151 MHz,  $\text{CDCl}_3$ )**  $\delta$  176.8, 156.4, 154.2, 152.5, 133.6, 125.7, 125.1, 124.0, 123.9, 118.2, 97.1, 74.0, 73.5, 71.0, 65.7, 59.4, 58.2, 54.6.

**HRMS (ESI)** calcd for  $[\text{C}_{18}\text{H}_{20}\text{O}_6 + \text{Na}]^+$  355.1152, found 355.1154.

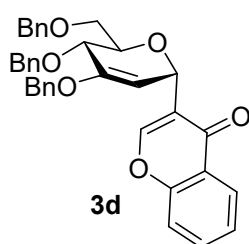

The compound **3d** was synthesized according to the general procedure **4c** and isolated through column chromatography on silica gel.  $R_f = 0.40$  (20%, n-hexane/ ethyl acetate), eluent 12% (n-hexane/ethyl acetate), as a white solid (27.9 mg, 69%).

**$^1\text{H}$  NMR (600 MHz,  $\text{CDCl}_3$ )**  $\delta$  8.24 (d,  $J = 7.8$  Hz, 1H), 8.11 (s, 1H), 7.66 (t,  $J = 7.6$  Hz, 1H), 7.45 (d,  $J = 8.4$  Hz, 1H), 7.40 (t,  $J = 7.4$  Hz, 1H), 7.37 – 7.26 (m, 15H), 5.67 (s, 1H, *bs*), 5.19 (s, 1H, *bs*), 4.81 (m,  $J = 9.8$  Hz, 3H), 4.63 (d,  $J = 11.5$  Hz, 1H), 4.55 (s, 2H), 4.22 (d,  $J = 2.9$  Hz, 1H), 4.03 (s, 1H, *bs*), 3.75 – 3.67 (m, 1H), 3.64 – 3.56 (m, 1H).

**$^{13}\text{C}$  NMR (151 MHz,  $\text{CDCl}_3$ )**  $\delta$  176.8, 156.4, 154.4, 152.4, 138.3, 138.0, 136.7, 133.7, 128.5 (2C), 128.4 (2C), 128.3 (2C), 128.1 (2C), 127.9, 127.8 (2C), 127.7, 127.7, 127.5 (2C), 125.8, 125.1, 124.1, 123.6, 118.2, 97.9, 74.4, 73.5, 72.97, 71.5, 69.1, 68.5, 66.1.

**HRMS (ESI)** calcd for  $[\text{C}_{36}\text{H}_{32}\text{O}_6 + \text{Na}]^+$  583.2091, found 583.2060.

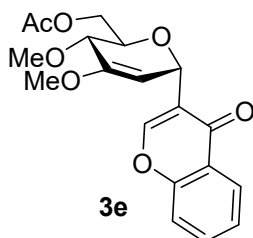

The compound **3e** was synthesized according to the general procedure **3e** and isolated through column chromatography on silica gel.  $R_f = 0.35$  (30%, n-hexane/ ethyl acetate), eluent 17% (n-hexane/ethyl acetate), brownish gummy (32.5 mg, 65%).

**$^1\text{H}$  NMR (500 MHz,  $\text{CDCl}_3$ )**  $\delta$  8.21 (d,  $J = 7.9$  Hz, 1H), 8.09 (s, 1H), 7.65 (t,  $J = 8.0$  Hz, 1H), 7.44 (d,  $J = 8.6$  Hz, 1H), 7.39 (t,  $J = 7.5$  Hz, 1H), 5.64 (s, 1H), 5.06 (d,  $J = 2.6$  Hz, 1H), 4.29 (td,  $J = 9.8, 4.2$  Hz, 1H), 4.25 – 4.15 (m, 2H), 3.61 (d,  $J = 1.9$  Hz, 1H), 3.57 (s, 3H), 3.49 (s, 3H), 2.07 (s, 3H).

**$^{13}\text{C}$  NMR (126 MHz,  $\text{CDCl}_3$ )**  $\delta$  176.3, 170.4, 156.2, 153.9, 152.4, 133.4, 125.6, 124.9, 123.9, 123.7, 117.9, 96.8, 73.4, 72.7, 65.7, 62.6, 58.1, 54.3, 20.5.

**HRMS (ESI)** calcd for  $[\text{C}_{19}\text{H}_{20}\text{O}_7 + \text{H}]^+$  361.1282, found 361.1290

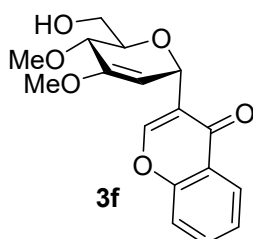

The compound **3f** was synthesized according to the general procedure **4c** and isolated through column chromatography on silica gel.  $R_f = 0.30$  (60%, n-hexane/ ethyl acetate), eluent 43% (n-hexane/ethyl acetate), brownish gummy (22.5 mg, 41%).

**<sup>1</sup>H NMR (600 MHz, CDCl<sub>3</sub>)** δ 8.15 (dd, *J* = 8.0, 1.2 Hz, 1H), 8.01 (s, 1H), 7.62 – 7.57 (m, 1H), 7.37 (d, *J* = 8.4 Hz, 1H), 7.33 (t, *J* = 7.5 Hz, 1H), 5.64 (d, *J* = 2.8 Hz, 1H), 4.85 (d, *J* = 3.2 Hz, 1H), 3.82 (td, *J* = 6.1, 4.1 Hz, 1H), 3.73 (dd, *J* = 11.7, 6.7 Hz, 1H), 3.68 – 3.62 (m, 2H), 3.54 (s, 3H), 3.46 (s, 3H).

**<sup>13</sup>C NMR (151 MHz, CDCl<sub>3</sub>)** δ 175.9, 155.4, 153.8, 153.5, 132.8, 124.9, 124.2, 123.0, 122.0, 117.2, 94.5, 73.1, 72.1, 64.7, 60.5, 58.1, 53.6.

**HRMS (ESI)** calcd for [C<sub>17</sub>H<sub>18</sub>O<sub>6</sub>+Na]<sup>+</sup> 341.0996, found 341.1003.

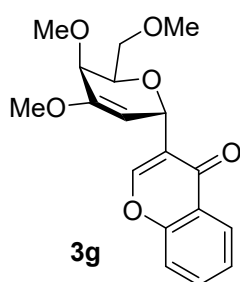

The compound **3g** was synthesized according to the general procedure xx and isolated through column chromatography on silica gel. *R<sub>f</sub>* = 0.43 (30%, n-hexane/ ethyl acetate), eluent 18% (n-hexane/ethyl acetate), as a pale yellow solid (37.6 mg, 71%).

**<sup>1</sup>H NMR (600 MHz, CDCl<sub>3</sub>)** δ 8.22 (d, *J* = 7.9 Hz, 1H), 8.12 (s, 1H), 7.67 (t, *J* = 7.7 Hz, 1H), 7.46 (d, *J* = 8.5 Hz, 1H), 7.40 (t, *J* = 7.5 Hz, 1H), 5.75 (d, *J* = 3.1 Hz, 1H), 5.38 (d, *J* = 3.4 Hz, 1H), 4.00 (td, *J* = 6.0, 1.9 Hz, 1H), 3.67 (d, *J* = 6.0 Hz, 2H), 3.63 (s, 3H), 3.61 (d, *J* = 1.5 Hz, 1H), 3.50 (s, 3H), 3.43 (s, 3H).

**<sup>13</sup>C NMR (151 MHz, CDCl<sub>3</sub>)** δ 176.8, 156.4, 154.2, 152.5, 133.6, 125.7, 125.1, 124.0, 123.9, 118.2, 97.1, 74.0, 73.5, 71.0, 65.7, 59.4, 58.2, 54.6.

**HRMS (ESI)** calcd for [C<sub>18</sub>H<sub>20</sub>O<sub>6</sub>+H]<sup>+</sup> 333.1333, found 333.1324.

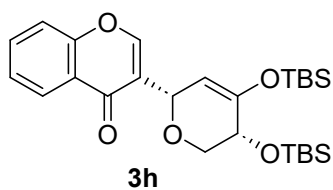

The compound **3h** was synthesized according to the general procedure **4c** and isolated through column chromatography on silica gel. *R<sub>f</sub>* = 0.57 (20%, n-hexane/ ethyl acetate), eluent 10% (n-hexane/ethyl acetate), white gummy (26.8 mg, 63%).

**<sup>1</sup>H NMR (600 MHz, CDCl<sub>3</sub>)** δ 8.12 (d, *J* = 7.9 Hz, 1H), 7.99 (s, 1H), 7.54 (t, *J* = 7.7 Hz, 1H), 7.35 (d, *J* = 8.4 Hz, 1H), 7.28 (t, *J* = 7.5 Hz, 1H), 5.36 (s, 1H, *bs*), 4.95 (s, 1H, *bs*), 3.86 – 3.79 (m, 2H), 3.72 – 3.67 (m, 1H), 0.81 (s, 18H), 0.06 (s, 3H), 0.03 (s, 3H), -0.00 (s, 3H), -0.05 (s, 3H). **<sup>13</sup>C NMR (151 MHz, CDCl<sub>3</sub>)** δ 175.4, 155.4, 153.6, 148.7, 132.5, 124.8, 124.0, 123.5, 123.0, 117.2, 104.8, 70.2, 67.3, 66.3, 24.9 (3C), 24.8 (3C), 17.2, 17.1, -5.2 (2C), -5.5 (2C).

**HRMS (ESI)** calcd for [C<sub>26</sub>H<sub>40</sub>O<sub>5</sub>Si<sub>2</sub>+Na]<sup>+</sup> 511.2306, found 511.2302

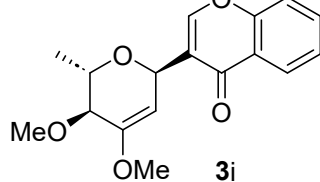

The compound **3i** was synthesized according to the general procedure **4c** and isolated through column chromatography on silica gel.  $R_f = 0.50$  (20%, n-hexane/ ethyl acetate), eluent 12% (n-hexane/ethyl acetate), pale yellow solid (43.0 mg, 75%).

**$^1\text{H}$  NMR (600 MHz,  $\text{CDCl}_3$ )**  $\delta$  8.17 (d,  $J = 7.9$  Hz, 1H), 8.03 (s, 1H), 7.60 (t,  $J = 7.7$  Hz, 1H), 7.39 (d,  $J = 8.4$  Hz, 1H), 7.34 (t,  $J = 7.5$  Hz, 1H), 5.53 (s, 1H, *bs*), 4.99 (d,  $J = 1.8$  Hz, 1H), 4.19 (qd,  $J = 6.6, 2.2$  Hz, 1H), 3.50 (s, 3H), 3.43 (s, 3H), 3.36 (s, 1H, *bs*), 1.26 (d,  $J = 6.7$  Hz, 3H).

**$^{13}\text{C}$  NMR (151 MHz,  $\text{CDCl}_3$ )**  $\delta$  175.7, 155.4, 153.2, 150.8, 132.6, 124.7, 124.1, 123.3, 123.0, 117.2, 96.3, 76.7, 70.1, 63.2, 56.8, 53.4, 15.3.

**HRMS (ESI)** calcd for  $[\text{C}_{17}\text{H}_{18}\text{O}_5 + \text{H}]^+$  303.1227, found 303.1226

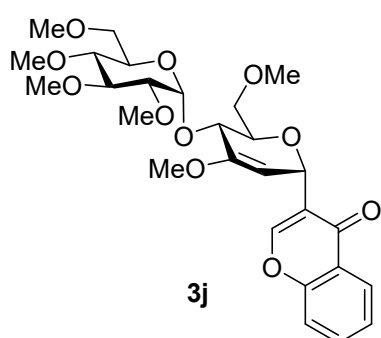

The compound **3j** was synthesized according to the general procedure **4c** and isolated through column chromatography on silica gel.  $R_f = 0.27$  (40%, n-hexane/ ethyl acetate), eluent 35% (n-hexane/ethyl acetate), brownish gummy (23.4 mg, 57%).

**$^1\text{H}$  NMR (600 MHz,  $\text{CDCl}_3$ )**  $\delta$  8.16 (dd,  $J = 8.0, 1.5$  Hz, 1H), 8.14 (d,  $J = 0.8$  Hz, 1H), 7.60 (ddd,  $J = 8.6, 7.2, 1.6$  Hz, 1H), 7.41 (d,  $J = 8.4$  Hz, 1H), 7.35 – 7.32 (m, 1H), 5.58 – 5.54 (m, 1H), 5.38 (d,  $J = 3.8$  Hz, 1H), 5.02 (d,  $J = 2.7$  Hz, 1H), 4.26 – 4.18 (m, 1H), 4.02 (dd,  $J = 3.1, 1.0$  Hz, 1H), 3.63 (ddd,  $J = 10.2, 3.2, 2.2$  Hz, 1H), 3.61 – 3.58 (m, 1H), 3.57 (s, 3H), 3.54 (dd,  $J = 10.5, 3.6$  Hz, 1H), 3.50 (d,  $J = 2.0$  Hz, 1H), 3.48 (s, 3H), 3.46 (s, 3H), 3.45 (d,  $J = 4.7$  Hz, 1H), 3.44 – 3.41 (m, 1H), 3.34 (s, 3H), 3.33 (s, 3H), 3.32 (s, 3H), 3.19 – 3.12 (m, 2H).

**$^{13}\text{C}$  NMR (151 MHz,  $\text{CDCl}_3$ )**  $\delta$  176.8, 156.4, 154.9, 152.3, 133.6, 125.7, 125.1, 124.0, 123.9, 118.3, 97.5, 96.2, 82.7, 81.4, 79.3, 75.4, 70.9, 70.8, 70.5, 69.4, 65.4, 60.8, 60.5, 59.2 (2C), 57.6, 54.4.

**HRMS (ESI)** calcd for  $[\text{C}_{27}\text{H}_{36}\text{O}_{11} + \text{Na}]^+$  559.2150, found 559.2167

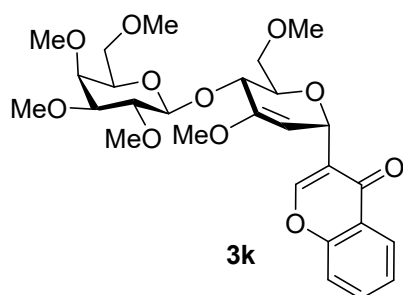

The compound **3k** was synthesized according to the general procedure **4c** and isolated through column chromatography

on silica gel.  $R_f = 0.35$  (50%, n-hexane/ ethyl acetate), eluent 38% (n-hexane/ethyl acetate), pale yellow gummy (22.6 mg, 55%).

**$^1\text{H}$  NMR (600 MHz,  $\text{CDCl}_3$ )**  $\delta$  8.16 (dd,  $J = 8.0, 1.1$  Hz, 1H), 8.07 (s, 1H), 7.62 – 7.58 (m, 1H), 7.39 (d,  $J = 8.4$  Hz, 1H), 7.34 (t,  $J = 7.5$  Hz, 1H), 5.53 (s, 1H, *bs*), 5.04 (d,  $J = 2.3$  Hz, 1H), 4.41 – 4.35 (m, 1H), 4.32 (d,  $J = 7.7$  Hz, 1H), 3.97 (s, 1H), 3.62 (dd,  $J = 10.0, 7.5$  Hz,

1H), 3.58 (d,  $J = 3.3$  Hz, 2H), 3.57 (s, 3H), 3.48 (s, 3H), 3.45 (s, 6H), 3.44 (s, 1H, *bs*), 3.43 (d,  $J = 4.1$  Hz, 1H), 3.42 (s, 1H, *bs*), 3.32 (d,  $J = 2.2$  Hz, 6H), 3.29 (dd,  $J = 9.5, 7.9$  Hz, 1H), 3.07 (dd,  $J = 9.7, 3.0$  Hz, 1H).

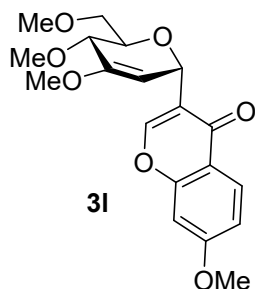

**$^{13}\text{C}$  NMR (151 MHz,  $\text{CDCl}_3$ )**  $\delta$  175.7, 155.4, 153.3, 149.5, 132.6, 124.7, 124.1, 123.3, 123.0, 117.2, 101.2, 97.2, 83.0, 79.4, 73.9, 73.7, 72.2, 70.9, 69.7, 69.4, 64.1, 60.2, 59.9, 58.3, 58.2, 57.3, 53.5.

**HRMS (ESI)** calcd for  $[\text{C}_{27}\text{H}_{36}\text{O}_{11}+\text{H}]^+$  537.2330, found 537.2308

The compound **3l** was synthesized according to the general procedure **4c** and isolated through column chromatography on silica gel.  $R_f = 0.30$  (30%, n-hexane/ ethyl acetate), eluent 24% (n-hexane/ethyl acetate), pale yellow solid (36.4 mg, 63%).

**$^1\text{H}$  NMR (600 MHz,  $\text{CDCl}_3$ )**  $\delta$  8.06 (d,  $J = 8.9$  Hz, 1H), 7.99 (d,  $J = 0.9$  Hz, 1H), 6.90 (dd,  $J = 8.9, 2.3$  Hz, 1H), 6.77 (d,  $J = 2.3$  Hz, 1H), 5.57 – 5.50 (m, 1H), 5.04 (d,  $J = 2.7$  Hz, 1H), 4.14 (dt,  $J = 7.0, 4.6$  Hz, 1H), 3.83 (s, 3H), 3.59 – 3.57 (m, 2H), 3.51 (s, 3H), 3.47 – 3.45 (m, 1H), 3.44 (s, 3H), 3.34 (s, 3H).

**$^{13}\text{C}$  NMR (151 MHz,  $\text{CDCl}_3$ )**  $\delta$  175.2, 163.1, 157.2, 152.7, 151.3, 126.1, 122.6, 116.9, 113.7, 99.1, 96.2, 72.9, 72.5, 69.9, 64.6, 58.3, 57.2, 54.8, 53.5.

**HRMS (ESI)** calcd for  $[\text{C}_{19}\text{H}_{22}\text{O}_7+\text{H}]^+$  363.1438, found 363.1436.

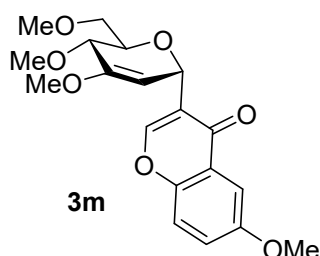

The compound **3m** was synthesized according to the general procedure **4c** and isolated through column chromatography on silica gel.  $R_f = 0.33$  (30%, n-hexane/ ethyl acetate), eluent 22% (n-hexane/ethyl acetate), brownish gummy (37.5 mg, 65%).

**$^1\text{H}$  NMR (600 MHz,  $\text{CDCl}_3$ )**  $\delta$  8.06 (s, 1H), 7.51 (d,  $J = 2.7$  Hz, 1H), 7.33 (d,  $J = 9.1$  Hz, 1H), 7.20 (s, 1H), 5.56 (s, 1H, *bs*), 5.03 (d,  $J = 2.2$  Hz, 1H), 4.16 – 4.12 (m, 1H), 3.83 (s, 3H), 3.62 – 3.57 (m, 2H), 3.51 (s, 3H), 3.46 (s, 1H, *bs*), 3.44 (s, 3H), 3.34 (s, 3H).

**$^{13}\text{C}$  NMR (151 MHz,  $\text{CDCl}_3$ )**  $\delta$  175.6, 155.9, 153.0, 151.5, 150.3, 123.5, 122.8, 122.0, 118.6, 103.6, 96.0, 72.8, 72.4, 70.0, 64.7, 58.3, 57.2, 54.9, 53.5.

**HRMS (ESI)** calcd for  $[\text{C}_{19}\text{H}_{22}\text{O}_7+\text{H}]^+$  363.1438, found 363.1452.

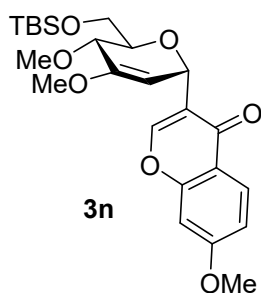

The compound **3n** was synthesized according to the general procedure **4c** and isolated through column chromatography on silica gel.  $R_f = 0.35$  (20%, n-hexane/ ethyl acetate), eluent 17% (n-hexane/ethyl acetate), white solid (35.6 mg, 74%).

**<sup>1</sup>H NMR (600 MHz, CDCl<sub>3</sub>)** δ 8.04 (d, *J* = 8.9 Hz, 1H), 7.99 (s, 1H), 6.89 (dd, *J* = 8.9, 2.3 Hz, 1H), 6.76 (d, *J* = 2.3 Hz, 1H), 5.48 (s, 1H, *bs*), 5.03 (d, *J* = 2.5 Hz, 1H), 4.04 (dd, *J* = 6.2, 3.1 Hz, 1H), 3.82 (s, 3H), 3.75 (m, 2H), 3.65 (d, *J* = 1.9 Hz, 1H), 3.50 (s, 3H), 3.42 (s, 3H), 0.82 (s, 9H), -0.00 (d, *J* = 1.1 Hz, 6H).

**<sup>13</sup>C NMR (151 MHz, CDCl<sub>3</sub>)** δ 176.1, 164.0, 158.2, 153.6, 151.9, 127.1, 124.1, 117.9, 114.7, 100.1, 97.4, 75.7, 73.4, 65.9, 62.1, 57.9, 55.8, 54.5, 25.9 (3C), 18.2, -5.4, -5.4.

**HRMS (ESI)** calcd for [C<sub>24</sub>H<sub>34</sub>O<sub>7</sub>Si + H]<sup>+</sup> 463.2147, found 463.2161.

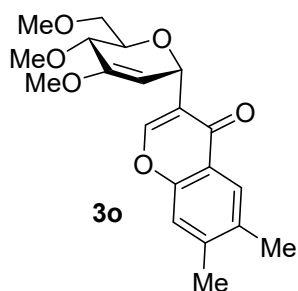

The compound **3o** was synthesized according to the general procedure **4c** and isolated through column chromatography on silica gel. *R<sub>f</sub>* = 0.30 (30%, n-hexane/ ethyl acetate), eluent 25% (n-hexane/ethyl acetate), yellow solid (35.0 mg, 61%).

**<sup>1</sup>H NMR (600 MHz, CDCl<sub>3</sub>)** δ 8.01 (s, 1H), 7.88 (s, 1H), 7.16 (s, 1H), 5.54 (d, *J* = 1.1 Hz, 1H), 5.03 (d, *J* = 2.6 Hz, 1H), 4.14 (dt, *J* =

7.0, 4.5 Hz, 1H), 3.62 – 3.56 (m, 2H), 3.50 (s, 3H), 3.47 – 3.44 (m, 1H), 3.43 (s, 3H), 3.34 (s, 3H), 2.31 (s, 3H), 2.28 (s, 3H).

**<sup>13</sup>C NMR (151 MHz, CDCl<sub>3</sub>)** δ 175.7, 154.0, 152.8, 151.3, 143.1, 133.4, 124.2, 122.4, 120.8, 117.2, 96.3, 72.8, 72.4, 69.9, 64.6, 58.3, 57.1, 53.5, 19.4, 18.3.

**HRMS (ESI)** calcd for [C<sub>20</sub>H<sub>24</sub>O<sub>6</sub> + H]<sup>+</sup> 361.1646, found 361.1641.

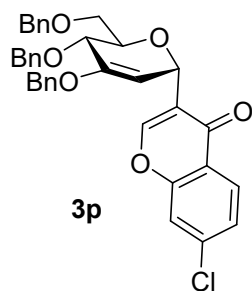

The compound **3p** was synthesized according to the general procedure **4c** and isolated through column chromatography on silica gel. *R<sub>f</sub>* = 0.52 (20%, n-hexane/ ethyl acetate), eluent 9% (n-hexane/ethyl acetate), yellow gummy (27.0 mg, 63%).

**<sup>1</sup>H NMR (600 MHz, CDCl<sub>3</sub>)** δ 8.11 (d, *J* = 2.5 Hz, 1H), 8.02 (s, 1H), 7.52 (dd, *J* = 8.9, 2.5 Hz, 1H), 7.34 (d, *J* = 8.9 Hz, 1H), 7.30 – 7.19 (m,

15H), 5.56 (s, 1H, *bs*), 5.09 (d, *J* = 2.9 Hz, 1H), 4.77 – 4.68 (m, 3H), 4.55 (d, *J* = 11.5 Hz, 1H), 4.47 (s, 2H, *bs*), 4.14 (dd, *J* = 10.6, 4.6 Hz, 1H), 3.93 (d, *J* = 4.3 Hz, 1H), 3.61 (dd, *J* = 10.2, 6.4 Hz, 1H), 3.52 (dd, *J* = 10.2, 4.6 Hz, 1H).

**<sup>13</sup>C NMR (151 MHz, CDCl<sub>3</sub>)** δ 175.7, 154.7, 154.6, 152.5, 138.2, 137.9, 136.6, 133.9, 131.1, 128.5 (2C), 128.4, 128.4, 128.3 (2C), 128.1 (2C), 127.9, 127.8 (2C), 127.7, 127.7, 127.5 (2C), 125.2, 124.9, 123.8, 120.0, 97.6, 74.4, 73.5, 73.0, 71.5, 69.2, 68.5, 66.0.

**HRMS (ESI)** calcd for [C<sub>19</sub>H<sub>22</sub>O<sub>7</sub> + H]<sup>+</sup> 595.1882, found 595.1930.

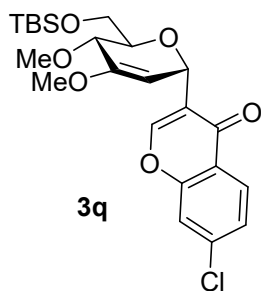

The compound **3q** was synthesized according to the general procedure **4c** and isolated through column chromatography on silica gel.  $R_f$  = 0.50 (20%, n-hexane/ ethyl acetate), eluent 12% (n-hexane/ethyl acetate), yellow solid (31.1 mg, 64%).

**$^1\text{H}$  NMR (600 MHz,  $\text{CDCl}_3$ )**  $\delta$  8.11 (d,  $J$  = 2.5 Hz, 1H), 8.08 (s, 1H), 7.52 (dd,  $J$  = 8.9, 2.5 Hz, 1H), 7.35 (d,  $J$  = 8.9 Hz, 1H), 5.47 (s, 1H, *bs*),

5.00 (d,  $J$  = 2.5 Hz, 1H), 4.03 (td,  $J$  = 6.2, 3.2 Hz, 1H), 3.74 (m, 2H), 3.65 – 3.62 (m, 1H), 3.50 (s, 3H), 3.41 (s, 3H), 0.82 (s, 9H), -0.00 (s, 6H).

**$^{13}\text{C}$  NMR (151 MHz,  $\text{CDCl}_3$ )**  $\delta$  175.6, 154.7, 154.3, 152.3, 133.9, 131.1, 125.1, 124.9, 124.5, 120.0, 96.8, 75.8, 73.4, 65.9, 62.1, 58.0, 54.5, 25.9 (3C), 18.2, -5.4, -5.4.

**HRMS (ESI)** calcd for  $[\text{C}_{23}\text{H}_{31}\text{ClO}_6\text{Si} + \text{Na}]^+$  489.1471, found 489.1487.

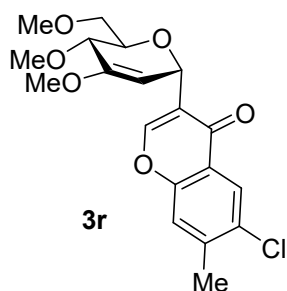

The compound **3r** was synthesized according to the general procedure **4c** and isolated through column chromatography on silica gel.  $R_f$  = 0.57 (20%, n-hexane/ ethyl acetate), eluent 10% (n-hexane/ethyl acetate), yellow solid (41.2 mg, 68%).

**$^1\text{H}$  NMR (600 MHz,  $\text{CDCl}_3$ )**  $\delta$  8.10 (s, 1H), 8.03 (s, 1H), 7.28 (s, 1H), 5.52 (s, 1H, *bs*), 5.01 (d,  $J$  = 2.2 Hz, 1H), 4.19 – 4.11 (m, 1H), 3.60 –

3.55 (m, 2H), 3.51 (s, 3H), 3.47 – 3.43 (m, 1H), 3.43 (s, 3H), 3.34 (s, 3H), 2.42 (s, 3H).

**$^{13}\text{C}$  NMR (151 MHz,  $\text{CDCl}_3$ )**  $\delta$  174.6, 153.7, 153.1, 151.5, 141.9, 130.9, 124.3, 122.8, 122.0, 119.0, 95.9, 72.9, 72.5, 69.9, 64.6, 58.3, 57.2, 53.5, 19.8.

**HRMS (ESI)** calcd for  $[\text{C}_{19}\text{H}_{21}\text{ClO}_6 + \text{H}]^+$  381.1099, found 381.1096.

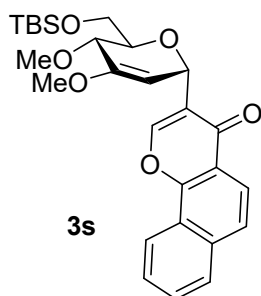

The compound **3s** was synthesized according to the general procedure **4c** and isolated through column chromatography on silica gel.  $R_f$  = 0.6 (20%, n-hexane/ ethyl acetate), eluent 8% (n-hexane/ethyl acetate), yellow gummy (37.7 mg, 75%).

**$^1\text{H}$  NMR (600 MHz,  $\text{CDCl}_3$ )**  $\delta$  8.39 (d,  $J$  = 8.2 Hz, 1H), 8.27 (s, 1H), 8.07 (d,  $J$  = 8.7 Hz, 1H), 7.84 (d,  $J$  = 8.0 Hz, 1H), 7.68 (d,  $J$  = 8.7 Hz,

1H), 7.64 – 7.56 (m, 1H), 7.16 (s, 1H, *bs*), 5.54 (d,  $J$  = 1.1 Hz, 1H), 5.09 (d,  $J$  = 2.6 Hz, 1H), 4.07 (td,  $J$  = 6.2, 3.2 Hz, 1H), 3.81 – 3.71 (m, 2H), 3.68 – 3.64 (m, 1H), 3.50 (s, 3H), 3.42 (s, 3H), 0.82 (s, 9H), -0.00 (d,  $J$  = 1.5 Hz, 6H).

**<sup>13</sup>C NMR (151 MHz, CDCl<sub>3</sub>)** δ 176.6, 153.9, 153.3, 152.1, 135.8, 129.3, 128.1, 127.2, 125.8, 125.3, 124.1, 122.4, 120.7, 120.3, 97.2, 75.8, 73.4, 66.1, 62.2, 57.9, 54.5, 25.9 (3C), 18.3, -5.4, -5.4.

**HRMS (ESI)** calcd for [C<sub>27</sub>H<sub>34</sub>O<sub>6</sub>Si + H]<sup>+</sup> 483.2197, found 483.2195.

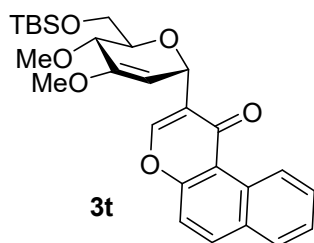

The compound **3t** was synthesized according to the general procedure **4c** and isolated through column chromatography on silica gel  $R_f$  = 0.57 (20%, n-hexane/ ethyl acetate), eluent 10% (n-hexane/ethyl acetate), brownish solid (37.1 mg, 74%).

**<sup>1</sup>H NMR (600 MHz, CDCl<sub>3</sub>)** δ 9.98 (d,  $J$  = 8.6 Hz, 1H), 8.12 (s, 1H), 7.99 (d,  $J$  = 9.0 Hz, 1H), 7.82 (d,  $J$  = 8.0 Hz, 1H), 7.67 (t,  $J$  = 7.8 Hz, 1H), 7.53 (t,  $J$  = 7.4 Hz, 1H), 7.42 (d,  $J$  = 9.0 Hz, 1H), 5.59 (s, 1H, *bs*), 5.10 (d,  $J$  = 2.0 Hz, 1H), 4.08 (td,  $J$  = 6.4, 3.0 Hz, 1H), 3.81 – 3.74 (m, 2H), 3.67 (d,  $J$  = 1.3 Hz, 1H), 3.51 (s, 3H), 3.42 (s, 3H), 0.82 (s, 9H), 0.00 (d,  $J$  = 2.4 Hz, 6H).

**<sup>13</sup>C NMR (151 MHz, CDCl<sub>3</sub>)** δ 177.4, 156.6, 151.0, 150.6, 134.4, 129.6, 128.2, 127.2 (2C), 126.0, 126.0, 125.6, 116.7, 116.2, 96.3, 74.8, 72.5, 65.0, 61.0, 56.8, 53.5, 24.8 (3C), 17.2, -6.4, -6.4.

**HRMS (ESI)** calcd for [C<sub>27</sub>H<sub>34</sub>O<sub>6</sub>Si + H]<sup>+</sup> 483.2197, found 483.2194.

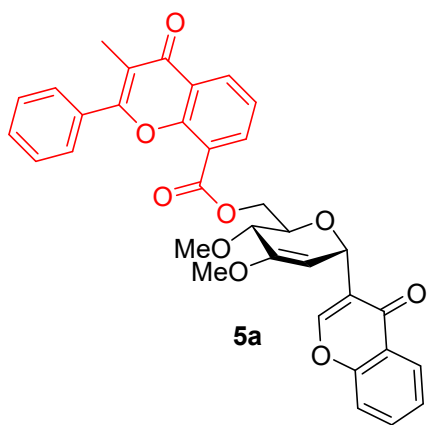

The compound **5a** was synthesized according to the general procedure **4c** and isolated through column chromatography on silica gel.  $R_f$  = 0.4 (40%, n-hexane/ ethyl acetate), eluent 27% (n-hexane/ethyl acetate), brownish solid (25.0 mg, 62%).

**<sup>1</sup>H NMR (600 MHz, CDCl<sub>3</sub>)** δ 8.38 (d,  $J$  = 7.8 Hz, 1H), 8.17 (d,  $J$  = 7.4 Hz, 1H), 8.13 (d,  $J$  = 7.9 Hz, 1H), 7.98 (s, 1H), 7.72 (d,  $J$  = 7.1 Hz, 2H), 7.59 (t,  $J$  = 7.6 Hz, 1H), 7.50 – 7.41 (m, 3H), 7.35 (dd,  $J$  = 15.1, 6.6 Hz, 3H), 5.61 (s, 1H, *bs*), 5.02 (s, 1H, *bs*), 4.57 – 4.49 (m, 1H), 4.42 (d,  $J$  = 11.6 Hz, 1H), 4.24 (d,  $J$  = 3.6 Hz, 1H), 3.60 (s, 1H, *bs*), 3.53 (s, 3H), 3.41 (s, 3H), 2.16 (s, 3H).

**<sup>13</sup>C NMR (151 MHz, CDCl<sub>3</sub>)** δ 177.3, 175.6, 162.9, 160.1, 155.3, 153.5, 153.1, 151.8, 135.3, 132.7, 131.9, 130.0, 129.5, 128.4 (2C), 127.4 (2C), 124.7, 124.2, 123.0, 122.9, 122.5, 122.2, 119.1, 117.1, 116.6, 95.6, 72.5, 71.4, 64.9, 62.7, 57.6, 53.6, 10.8.

**HRMS (ESI)** calcd for [C<sub>34</sub>H<sub>28</sub>O<sub>9</sub> + H]<sup>+</sup>, 581.1806, found 581.1819.

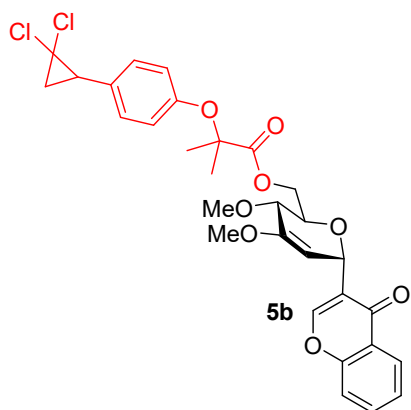

The compound **5b** was synthesized according to the general procedure **4c** and isolated through column chromatography on silica gel.  $R_f$  = 0.47 (30%, n-hexane/ ethyl acetate), eluent 18% (n-hexane/ethyl acetate), pale yellow gummy (26.6 mg, 67%).

**$^1\text{H}$  NMR (600 MHz,  $\text{CDCl}_3$ )**  $\delta$  8.15 (d,  $J$  = 7.9 Hz, 1H), 7.98 (s, 1H), 7.60 (t,  $J$  = 7.7 Hz, 1H), 7.38 (d,  $J$  = 8.4 Hz, 1H), 7.33 (t,  $J$  = 7.4 Hz, 1H), 6.98 (d,  $J$  = 7.7 Hz, 2H), 6.73

(d,  $J$  = 7.7 Hz, 2H), 5.52 (s, 1H, *bs*), 5.01 (s, 1H, *bs*), 4.38 – 4.29 (m, 1H), 4.21 (d,  $J$  = 11.6 Hz, 1H), 4.13 (d,  $J$  = 3.7 Hz, 1H), 3.50 (s, 3H), 3.46 (s, 1H, *bs*), 3.35 (s, 3H), 2.67 (d,  $J$  = 9.7 Hz, 1H), 1.80 – 1.74 (m, 1H), 1.66 – 1.62 (m, 1H), 1.52 (s, 3H), 1.49 (s, 3H).

**$^{13}\text{C}$  NMR (151 MHz,  $\text{CDCl}_3$ )**  $\delta$  176.6, 174.0, 156.4, 154.8, 154.0, 152.5, 133.7, 129.6 (2C), 128.2, 125.8, 125.2, 124.0, 123.5, 118.8 (2C), 118.2, 96.7, 79.1, 73.3, 72.3, 65.9, 63.7, 60.8, 58.5, 54.6, 34.8, 25.8, 25.5, 25.3.

**HRMS (ESI)** calcd for  $[\text{C}_{30}\text{H}_{30}\text{Cl}_2\text{O}_8+\text{H}]^+$  589.1390, found 589.1394.

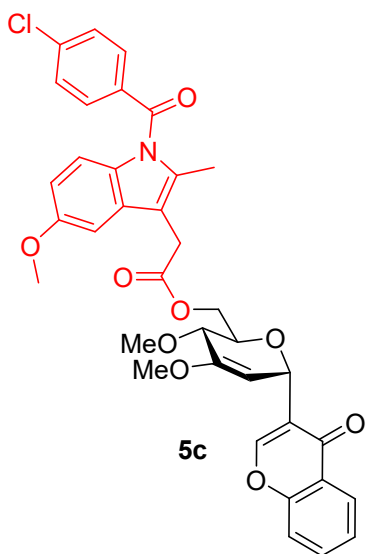

The compound **5c** was synthesized according to the general procedure **4c** and isolated through column chromatography on silica gel.  $R_f$  = 0.3 (30%, n-hexane/ ethyl acetate), eluent 25% (n-hexane/ethyl acetate), yellow gummy (25.0 mg, 65%).

**$^1\text{H}$  NMR (600 MHz,  $\text{CDCl}_3$ )**  $\delta$  8.21 (d,  $J$  = 7.9 Hz, 1H), 8.00 (s, 1H), 7.67 (t,  $J$  = 7.8 Hz, 1H), 7.64 (d,  $J$  = 7.5 Hz, 2H), 7.47 – 7.44 (m, 3H), 7.41 (t,  $J$  = 7.5 Hz, 1H), 6.96 (s, 1H), 6.81 (d,  $J$  = 9.0 Hz, 1H), 6.57 (d,  $J$  = 9.0 Hz, 1H), 5.56 (s, 1H, *bs*), 5.05 (s, 1H, *bs*), 4.38 – 4.30 (m, 1H), 4.25 – 4.21 (m, 1H), 4.19 (d,  $J$  = 3.3 Hz, 1H), 3.80 (s, 3H), 3.70 (d,  $J$  = 2.9 Hz, 2H), 3.56 (s, 3H), 3.51 (d,  $J$  = 3.1 Hz, 1H), 3.40 (s, 3H), 2.34 (s, 3H).

**$^{13}\text{C}$  NMR (151 MHz,  $\text{CDCl}_3$ )**  $\delta$  176.5, 170.6, 168.3, 156.4, 156.1, 154.0, 152.6, 139.2, 136.0, 133.9, 133.7, 131.2 (2C), 130.7, 130.5, 129.1 (2C), 125.8, 125.2, 124.0, 123.5, 118.2, 114.9, 112.3, 111.8, 101.2, 96.7, 73.2, 72.4, 65.7, 63.1, 58.5, 55.7, 54.6, 30.3, 13.3.

**HRMS (ESI)** calcd for  $[\text{C}_{36}\text{H}_{32}\text{ClNO}_9+\text{H}]^+$  658.1838, found 658.1856.



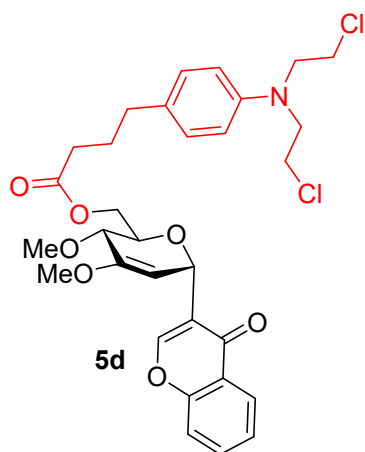

The compound **5d** was synthesized according to the general procedure **4c** and isolated through column chromatography on silica gel.  $R_f = 0.4$  (40%, n-hexane/ ethyl acetate), eluent 27% (n-hexane/ethyl acetate), brownish solid (27.2 mg, 69%).

**$^1\text{H}$  NMR (600 MHz,  $\text{CDCl}_3$ )**  $\delta$  8.16 (d,  $J = 7.9$  Hz, 1H), 8.04 (s, 1H), 7.61 (t,  $J = 7.8$  Hz, 1H), 7.39 (d,  $J = 8.4$  Hz, 1H), 7.34 (t,  $J = 7.5$  Hz, 1H), 6.97 (d,  $J = 8.4$  Hz, 2H), 6.52 (d,  $J = 8.4$  Hz, 2H), 5.59 (d,  $J = 1.0$  Hz, 1H), 5.02 (d,  $J = 2.6$  Hz, 1H), 4.26 – 4.23 (m, 1H), 4.20 – 4.12 (m, 2H), 3.61 (t,  $J = 7.1$  Hz, 4H), 3.55 (s, 1H, *bs*), 3.54 – 3.52 (t, 4H), 3.52 (s, 3H), 3.43 (s, 3H), 2.46 (t,  $J = 7.5$  Hz, 2H), 2.28 (t,  $J = 7.4$  Hz, 2H), 1.82 (p,  $J = 7.5$  Hz, 2H).

**$^{13}\text{C}$  NMR (151 MHz,  $\text{CDCl}_3$ )**  $\delta$  176.6, 173.4, 156.4, 154.2, 152.5, 144.3, 133.7, 130.5, 129.7 (2C), 125.8, 125.2, 124.0, 123.7, 118.2, 112.2 (2C), 96.9, 73.4, 72.7, 65.8, 62.5, 58.4, 54.6, 53.6 (2C), 40.5 (2C), 33.9, 33.5, 26.7.

**HRMS (ESI)** calcd for  $[\text{C}_{31}\text{H}_{35}\text{Cl}_2\text{NO}_7 + \text{H}]^+$  604.1863, found: 604.1855

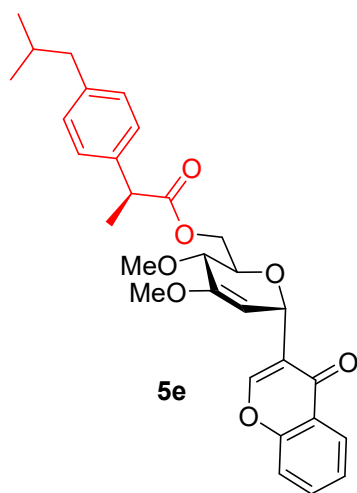

The compound **5e** was synthesized according to the general procedure **4c** and isolated through column chromatography on silica gel.  $R_f = 0.27$  (20%, n-hexane/ ethyl acetate), eluent 16% (n-hexane/ethyl acetate), pale yellow gummy (29.8 mg, 71%).

**$^1\text{H}$  NMR (600 MHz,  $\text{CDCl}_3$ )**  $\delta$  8.16 (d,  $J = 7.8$  Hz, 1H), 7.94 (s, 1H), 7.60 (t,  $J = 7.7$  Hz, 1H), 7.39 (d,  $J = 8.3$  Hz, 1H), 7.34 (t,  $J = 7.3$  Hz, 1H), 7.11 (d,  $J = 7.6$  Hz, 2H), 6.95 (d,  $J = 7.5$  Hz, 2H), 5.51 (s, 1H, *bs*), 4.98 (s, 1H, *bs*), 4.25 – 4.22 (m, 1H), 4.11 – 4.10 (m, 1H), 4.04 (d,  $J = 2.5$  Hz, 1H), 3.68 – 3.65 (m, 1H), 3.49 (s, 3H), 3.44 (d,  $J = 1.0$  Hz, 1H), 3.25 (s, 3H), 2.29 (d,  $J = 6.9$  Hz, 2H), 1.74 – 1.65 (m, 1H), 1.40 (d,  $J = 7.0$  Hz, 3H), 0.77 (d,  $J = 6.5$  Hz, 6H).

**$^{13}\text{C}$  NMR (151 MHz,  $\text{CDCl}_3$ )**  $\delta$  176.6, 174.4, 156.4, 154.1, 152.7, 140.6, 137.5, 133.7, 129.3 (2C), 127.2 (2C), 125.8, 125.2, 124.0, 123.5, 118.2, 96.4, 73.2, 72.1, 66.0, 62.9, 58.5, 55.0, 45.0, 45.0, 30.1, 22.3 (2C), 18.2.

**HRMS (ESI)** calcd for  $[\text{C}_{30}\text{H}_{34}\text{O}_7 + \text{H}]^+$  507.2377, found 507.2375.

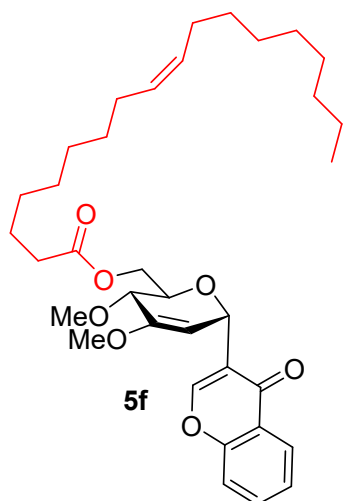

The compound **5f** was synthesized according to the general procedure **4c** and isolated through column chromatography on silica gel.  $R_f = 0.45$  (10%, n-hexane/ ethyl acetate), eluent 4% (n-hexane/ethyl acetate), pale yellow gummy (22.7 mg, 57%).

**$^1\text{H}$  NMR (600 MHz,  $\text{CDCl}_3$ )**  $\delta$  8.17 (d,  $J = 8.0$  Hz, 1H), 8.04 (s, 1H), 7.60 (t,  $J = 7.7$  Hz, 1H), 7.39 (d,  $J = 8.3$  Hz, 1H), 7.34 (t,  $J = 7.3$  Hz, 1H), 5.58 (s, 1H, *bs*), 5.26 (d,  $J = 4.1$  Hz, 2H), 5.02 (s, 1H, *bs*), 4.27 – 4.21 (m, 1H), 4.16 (s, 2H, *bs*), 3.56 (s, 1H, *bs*), 3.52 (s, 3H), 3.44 (s, 3H), 2.26 (t,  $J = 7.4$  Hz, 2H), 1.97 – 1.88 (m, 4H), 1.59 – 1.48 (m, 2H), 1.19 (s, 20H, *bs*), 0.80 (t,  $J = 6.5$  Hz, 3H).

**$^{13}\text{C}$  NMR (151 MHz,  $\text{CDCl}_3$ )**  $\delta$  175.6, 172.6, 155.4, 153.1, 151.5, 132.7, 129.0, 128.7, 124.8, 124.1, 123.0, 122.7, 117.2, 95.8, 72.4, 71.6, 64.8, 61.5, 57.4, 53.6, 33.1, 30.9, 28.7, 28.7, 28.5, 28.3 (3C, *bs*), 28.1, 28.1, 26.2, 26.1, 23.9, 21.7, 13.1.

**HRMS (ESI)** calcd for  $[\text{C}_{35}\text{H}_{50}\text{O}_7 + \text{H}]^+$  583.3629, found 583.3628.

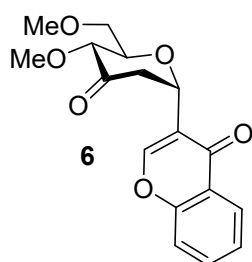

The compound **6** was synthesized according to the scheme **1B** and isolated through column chromatography on silica gel.  $R_f = 0.30$  (30%, n-hexane/ ethyl acetate), eluent 20% (n-hexane/ethyl acetate), pale yellow gummy (21.0 mg, 73%).

**$^1\text{H}$  NMR (600 MHz,  $\text{CDCl}_3$ )**  $\delta$  8.14 (d,  $J = 6.9$  Hz, 1H), 8.00 (s, 1H), 7.65 – 7.57 (m, 1H), 7.39 (d,  $J = 7.7$  Hz, 1H), 7.34 (t,  $J = 6.3$  Hz, 1H), 5.45 (s, 1H, *bs*), 4.00 (d,  $J = 3.0$  Hz, 1H), 3.85 (d,  $J = 6.5$  Hz, 1H), 3.64 – 3.54 (m, 2H), 3.43 (s, 3H), 3.32 (s, 3H), 3.07 – 3.02 (m, 1H), 2.64 (dd,  $J = 15.5, 7.2$  Hz, 1H).

**$^{13}\text{C}$  NMR (151 MHz,  $\text{CDCl}_3$ )**  $\delta$  205.7, 176.3, 156.2, 154.0, 133.9, 125.9, 125.3, 123.9, 123.4, 118.2, 81.2, 76.6, 72.1, 68.5, 59.5, 59.1, 44.3.

**HRMS (ESI)** calcd for  $[\text{C}_{17}\text{H}_{18}\text{O}_6 + \text{H}]^+$  319.1176, found 319.1172.

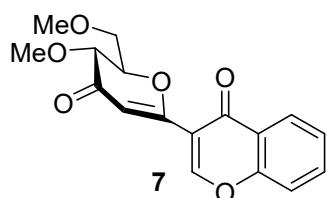

The compound **7** was synthesized according to scheme **1B** and isolated through column chromatography on silica gel.  $R_f = 0.35$  (30%, n-hexane/ ethyl acetate), eluent 20% (n-hexane/ethyl acetate), yellow solid (24.5 mg, 86%).

**$^1\text{H}$  NMR (600 MHz,  $\text{CDCl}_3$ )**  $\delta$  8.51 (s, 1H), 8.20 (d,  $J = 7.9$  Hz, 1H), 7.64 (t,  $J = 7.7$  Hz, 1H), 7.45 – 7.36 (m, 2H), 6.88 (s, 1H), 4.39 (dd,  $J = 11.2, 2.7$  Hz, 1H), 3.91 (d,  $J = 11.2$  Hz, 1H), 3.75 (s, 2H, *bs*), 3.61 (s, 3H), 3.41 (s, 3H).

**<sup>13</sup>C NMR (151 MHz, CDCl<sub>3</sub>)** δ 193.9, 174.1, 161.7, 157.7, 155.4, 134.2, 126.5, 126.1, 124.3, 118.1, 116.2, 105.5, 80.5, 76.2, 70.6, 60.6, 59.5.

**HRMS (ESI)** calcd for [C<sub>17</sub>H<sub>16</sub>O<sub>6</sub>+H]<sup>+</sup> 317.1020, found 317.1021.

## References

- 1 J. Zhao, S. Wei, X. Ma and H. Shao, *Carbohydr. Res.*, 2010, **345**, 168–171.
- 2 Q. Tong, R.-F. Xiu, J.-H. Chen, Y. Zhang, B.-D. Cui, N.-W. Wan, Y.-Z. Chen and W.-Y. Han, *ACS Catal.*, 2023, **13**, 12692–12699.
- 3 Q. Yang, Y. He, T. Wang, L. Zeng and Z. Zhang, *Mol. Divers.*, 2016, **20**, 9–16.

## 7. NMR spectrum of compounds

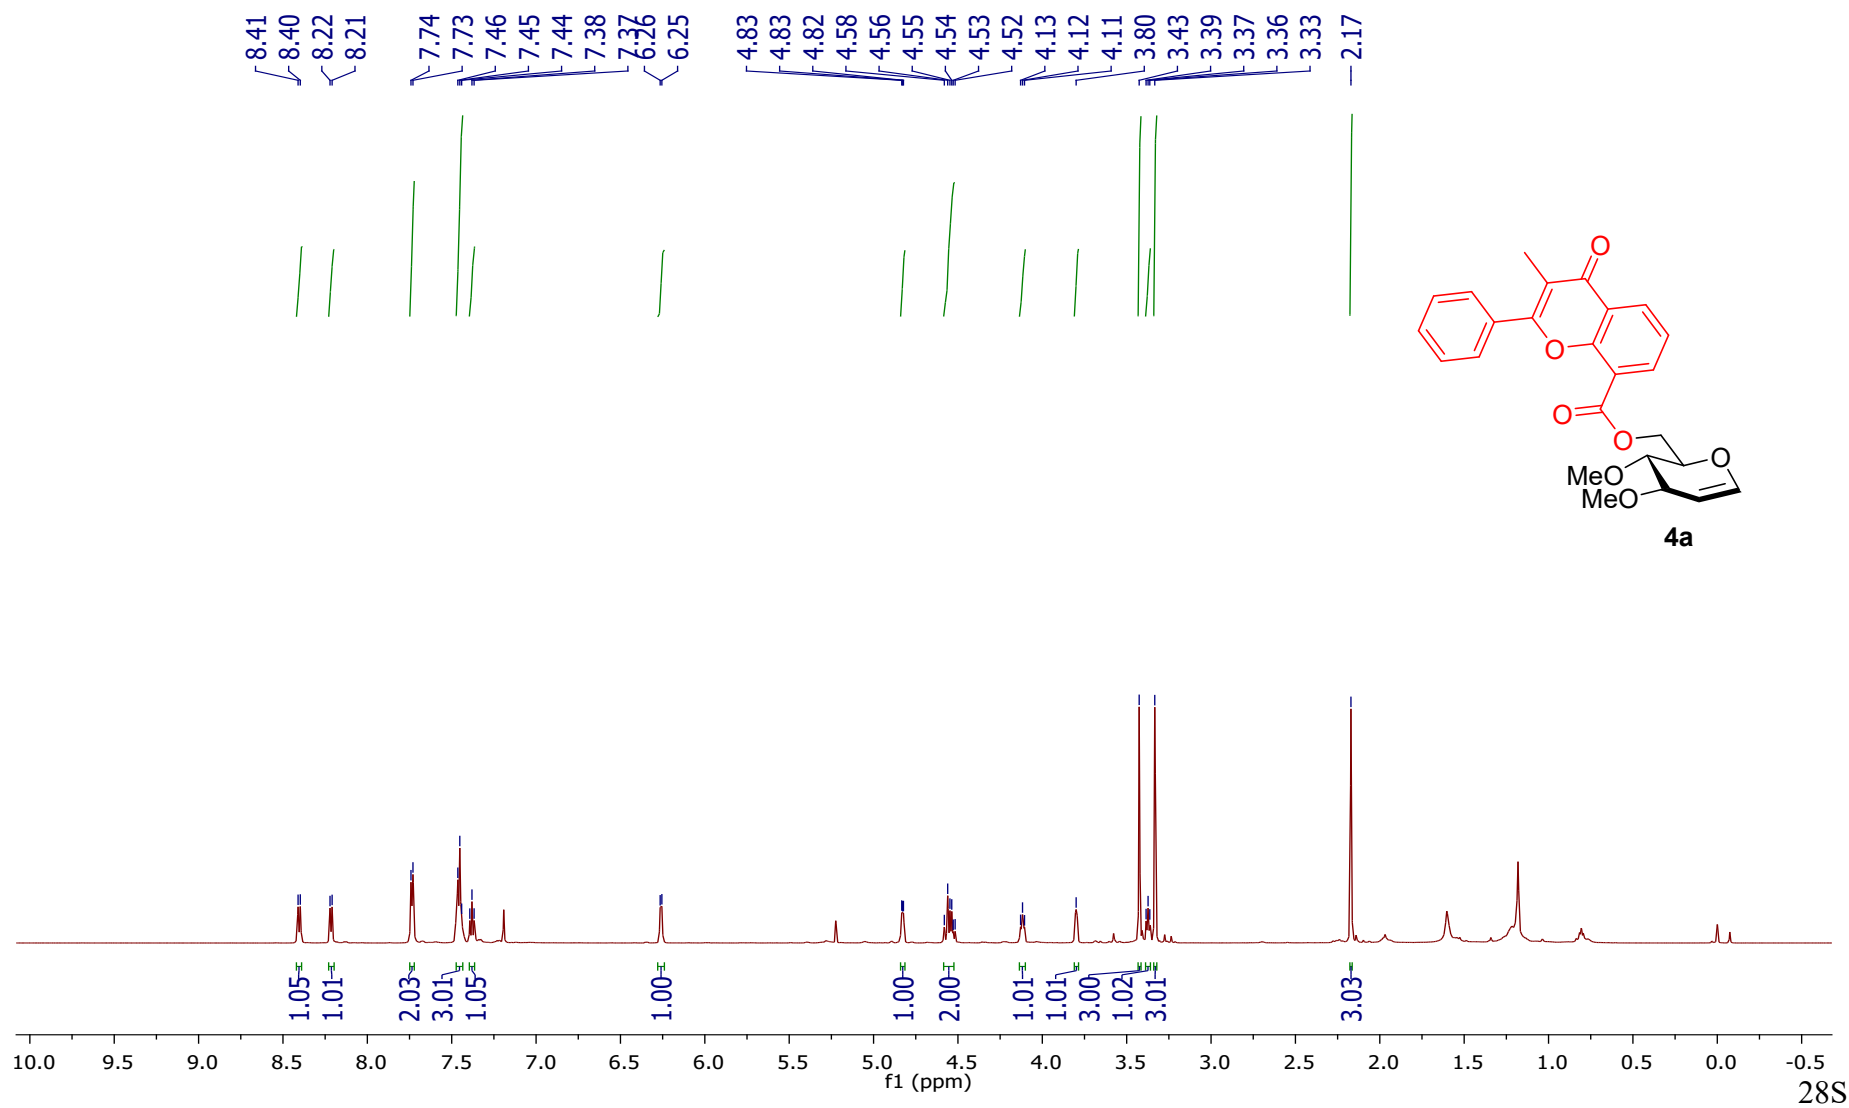

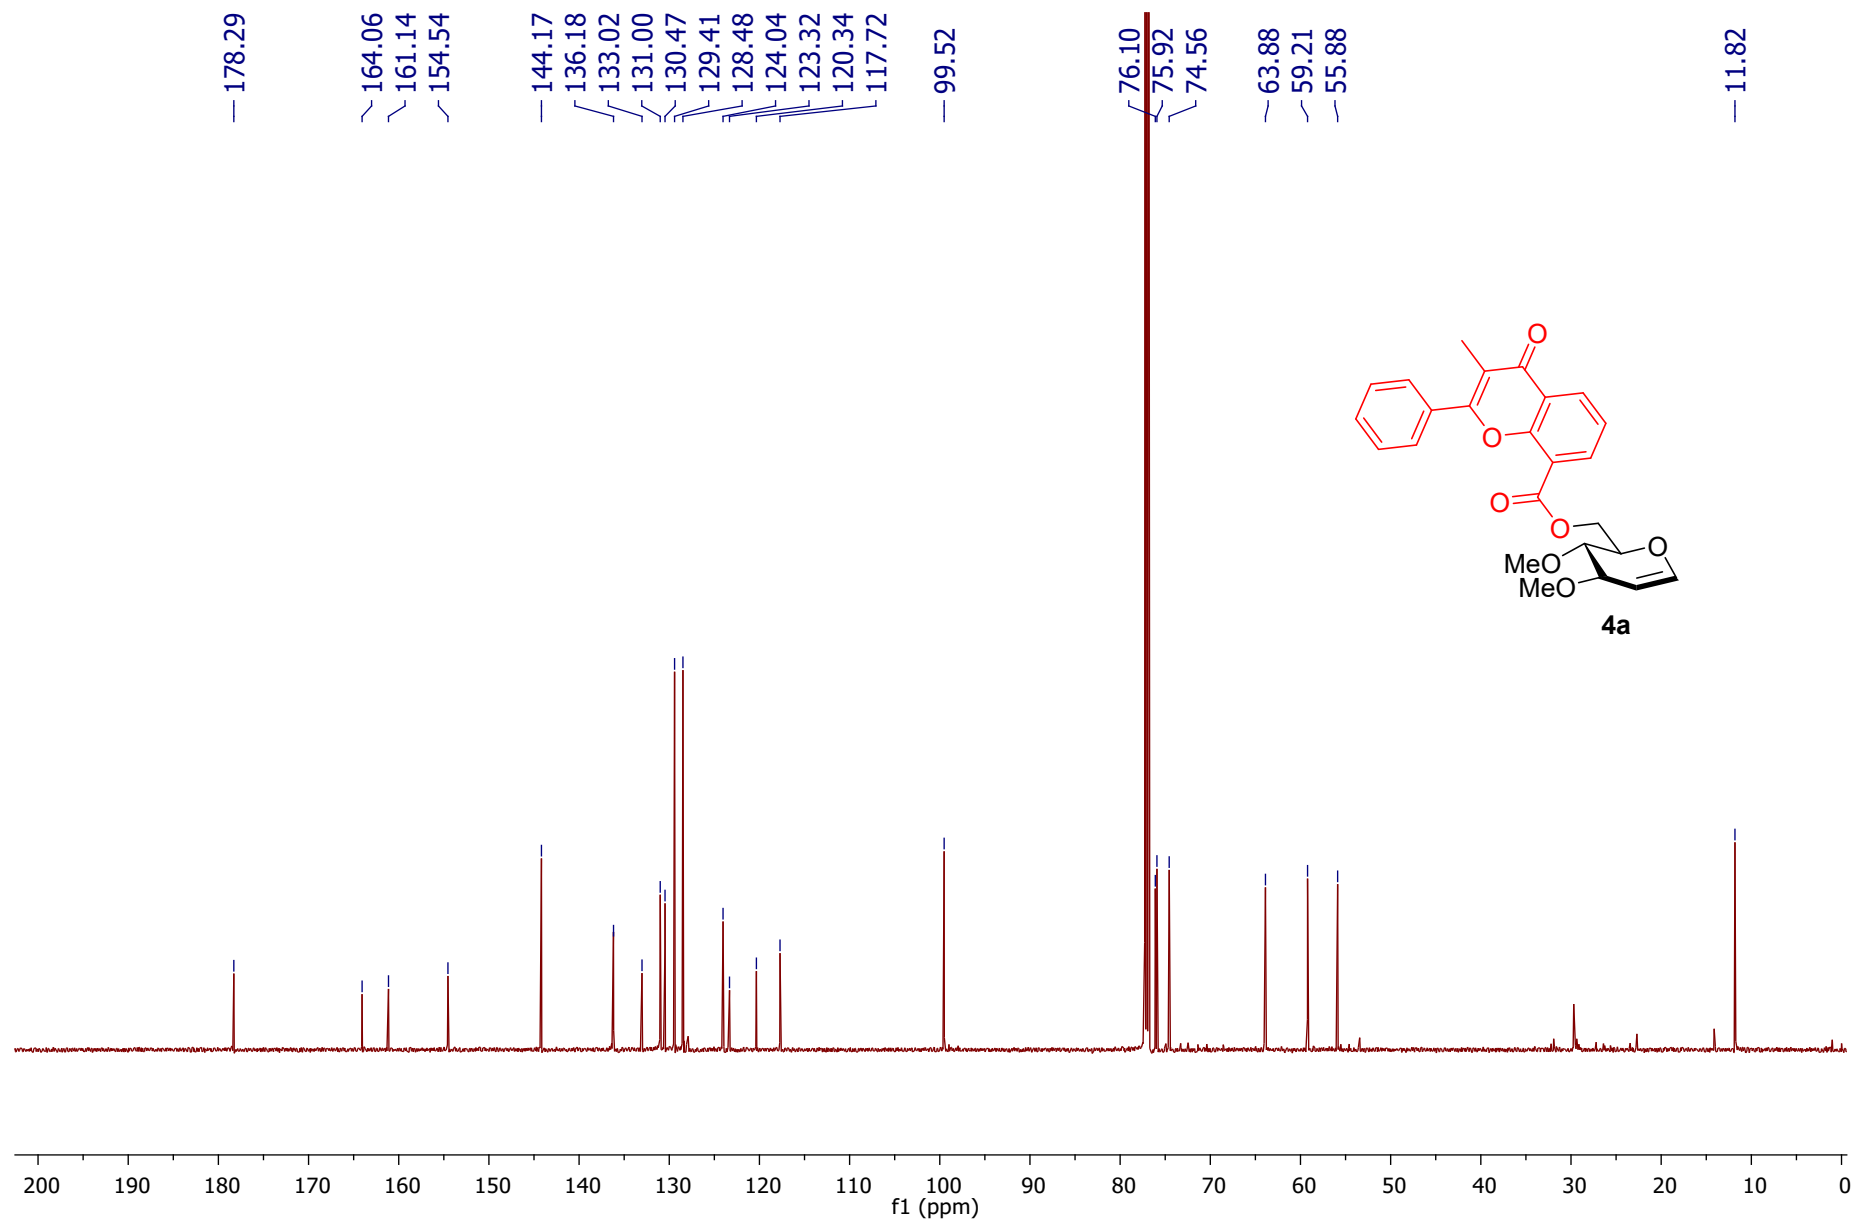

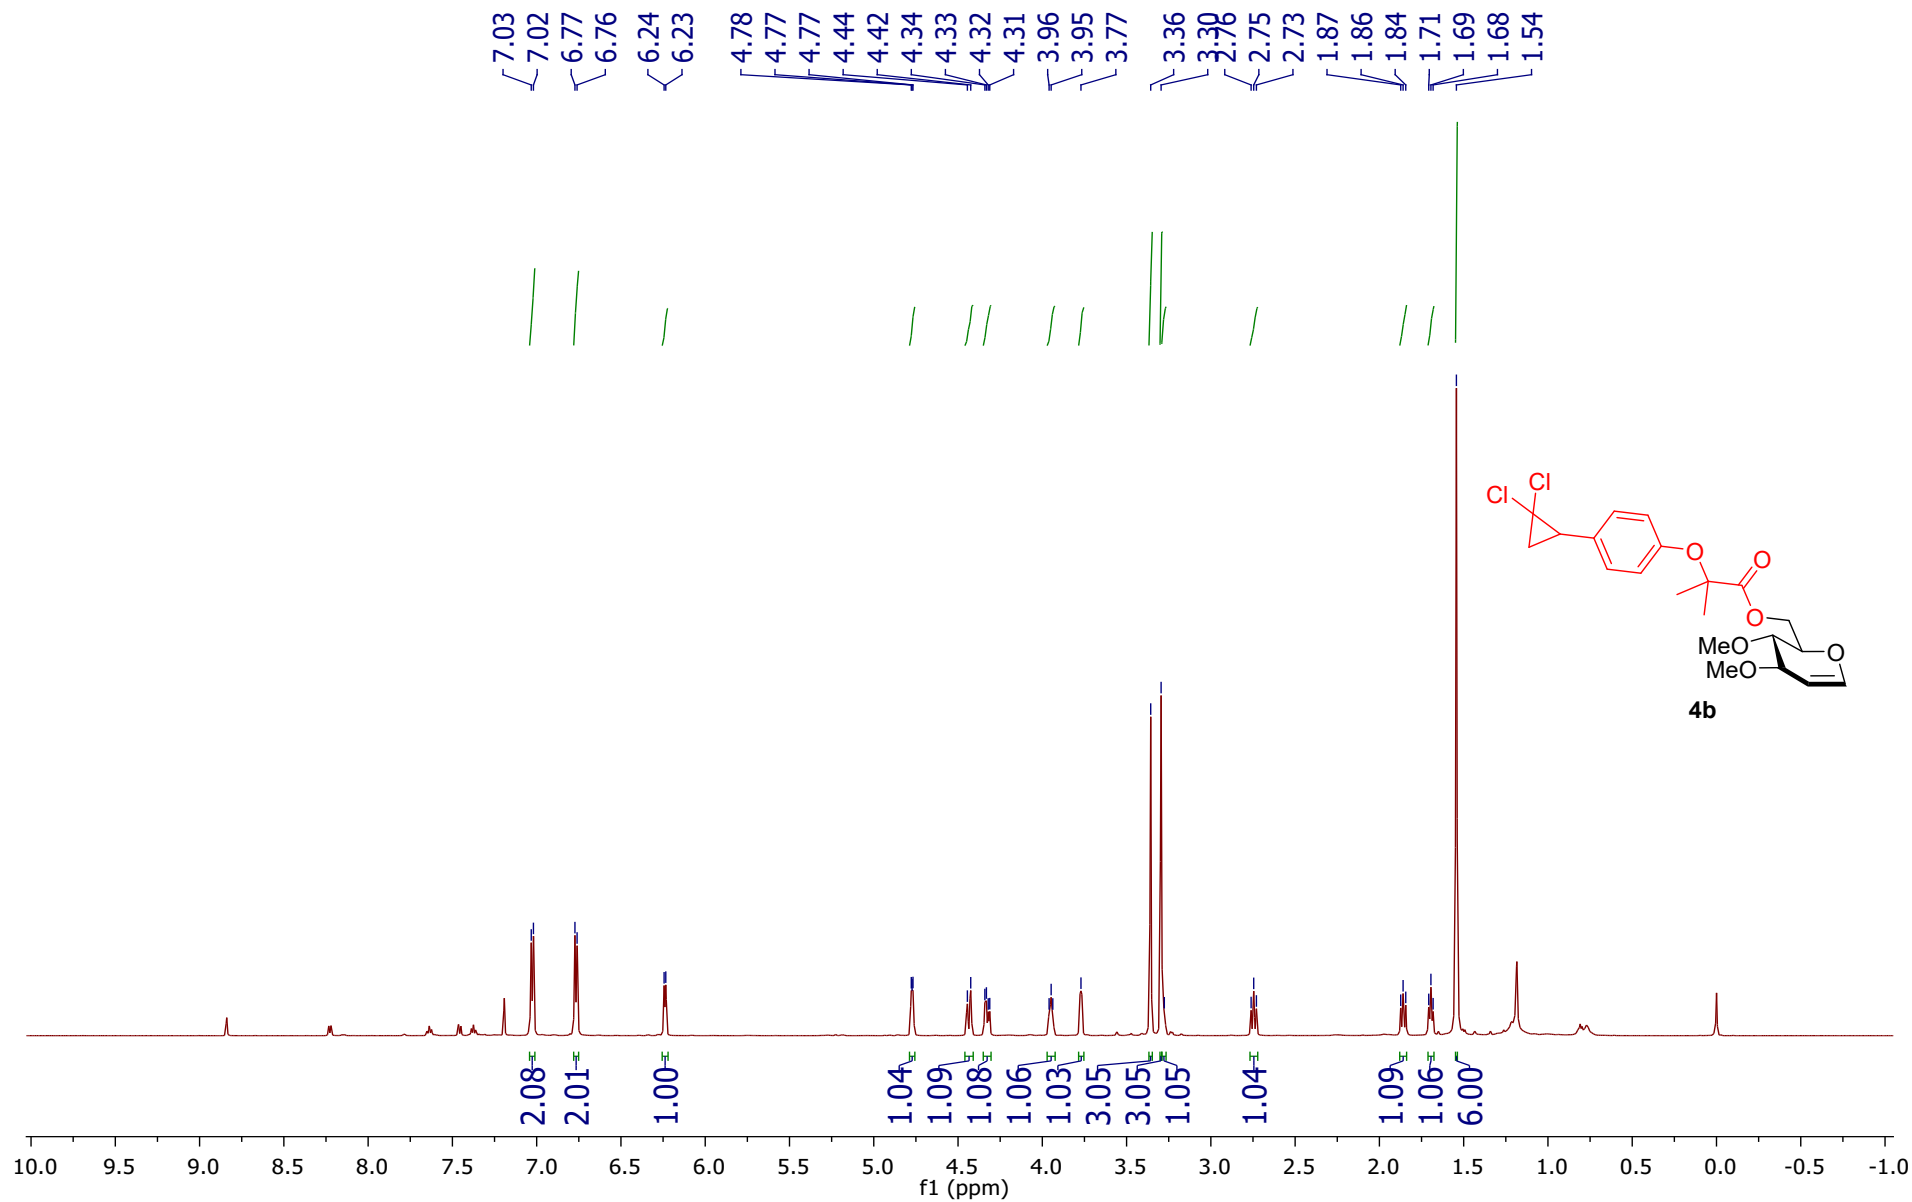

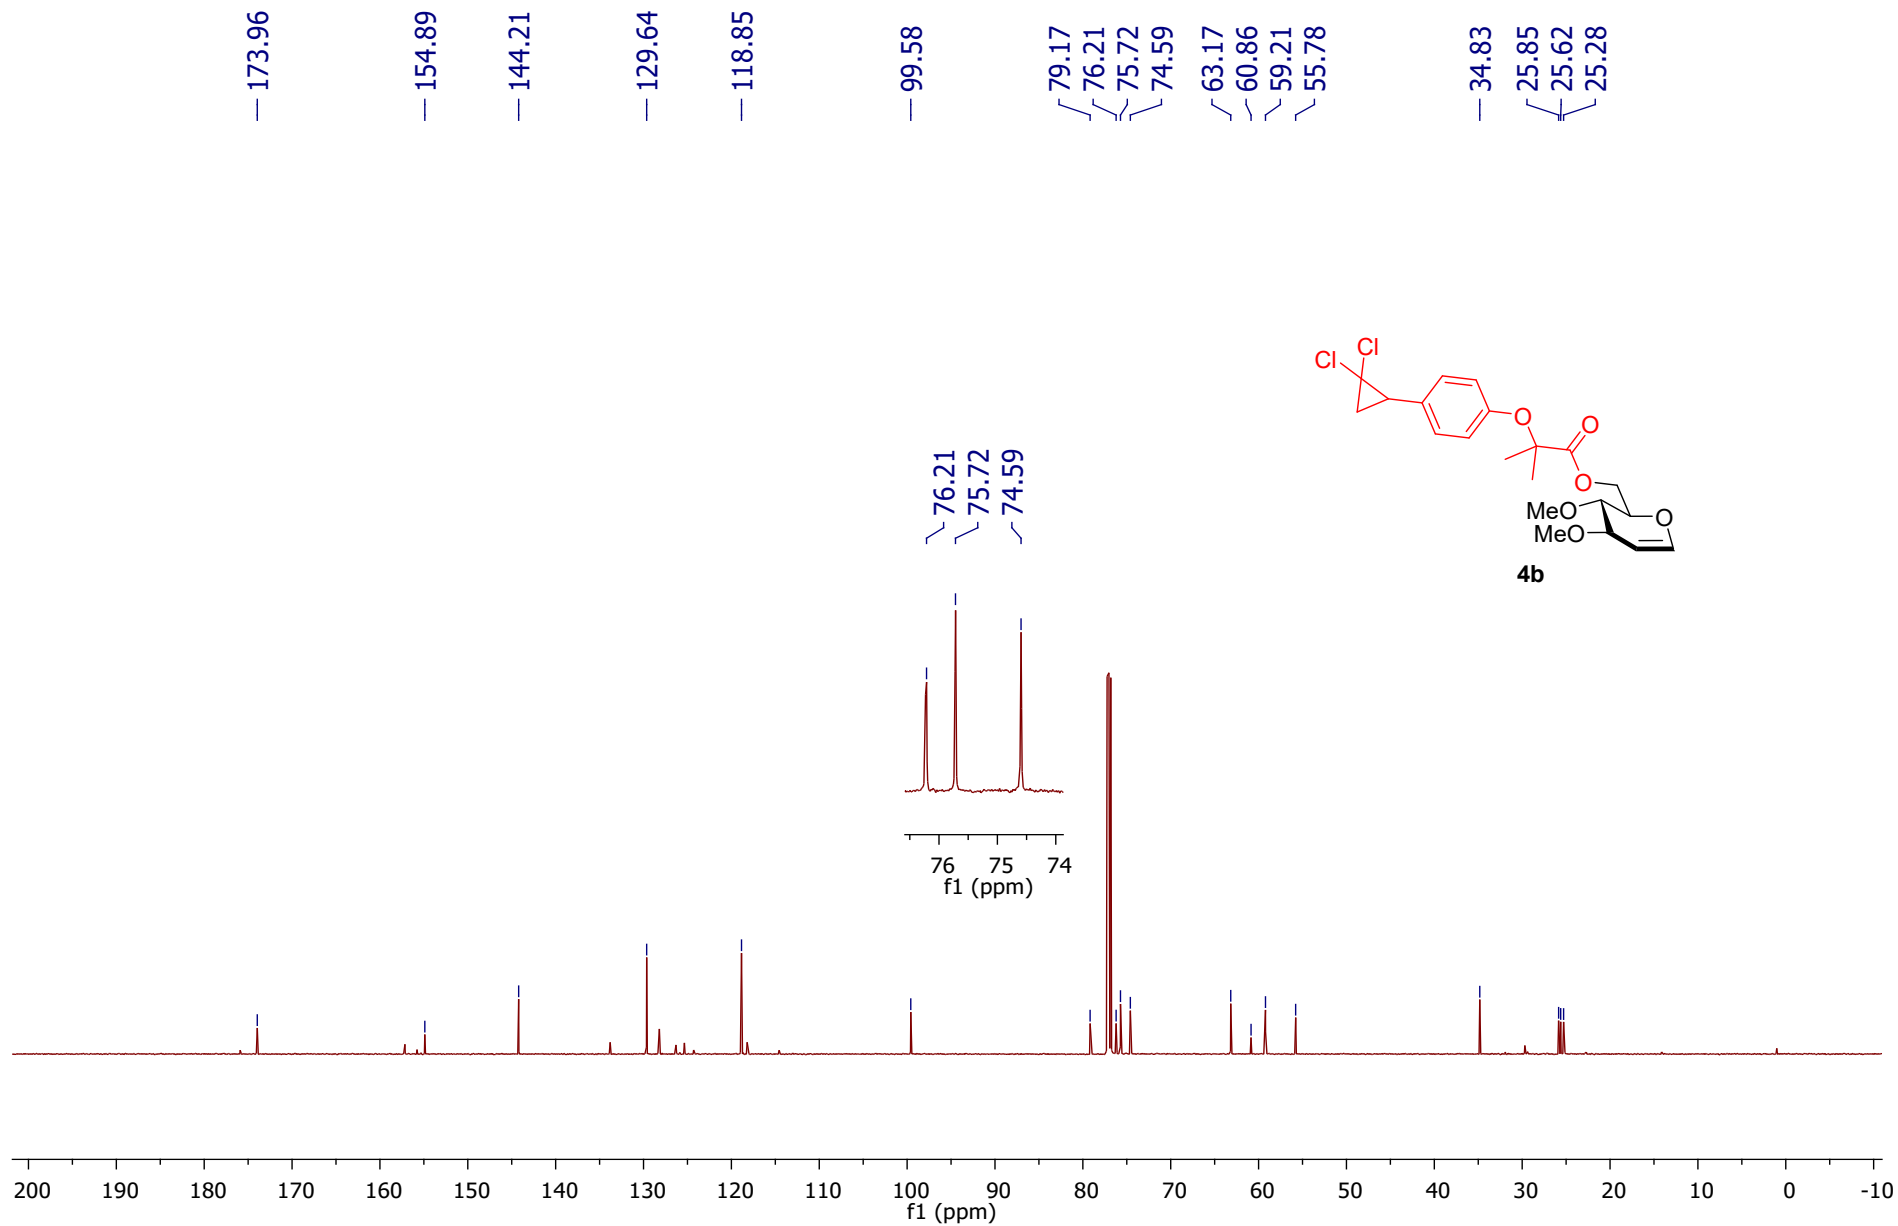

31S

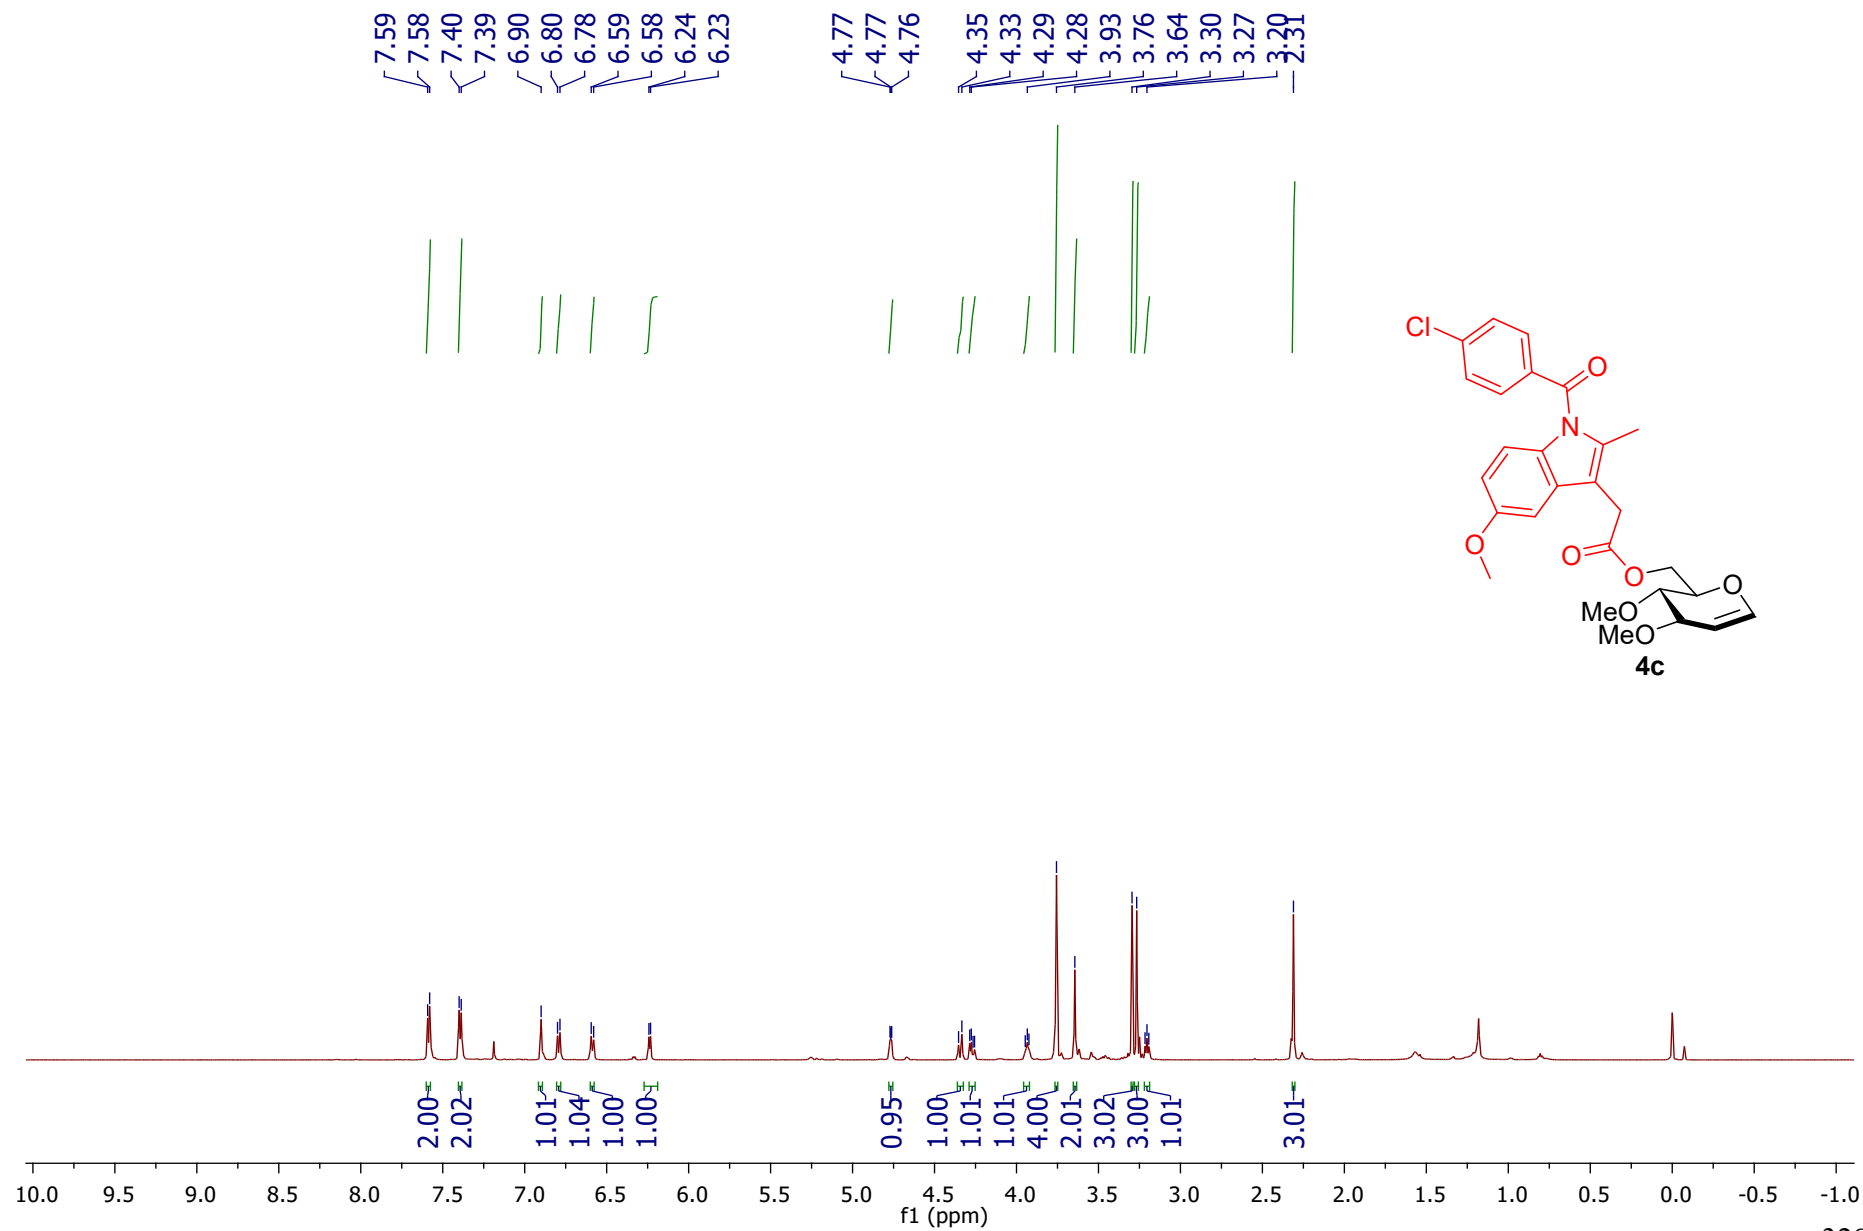



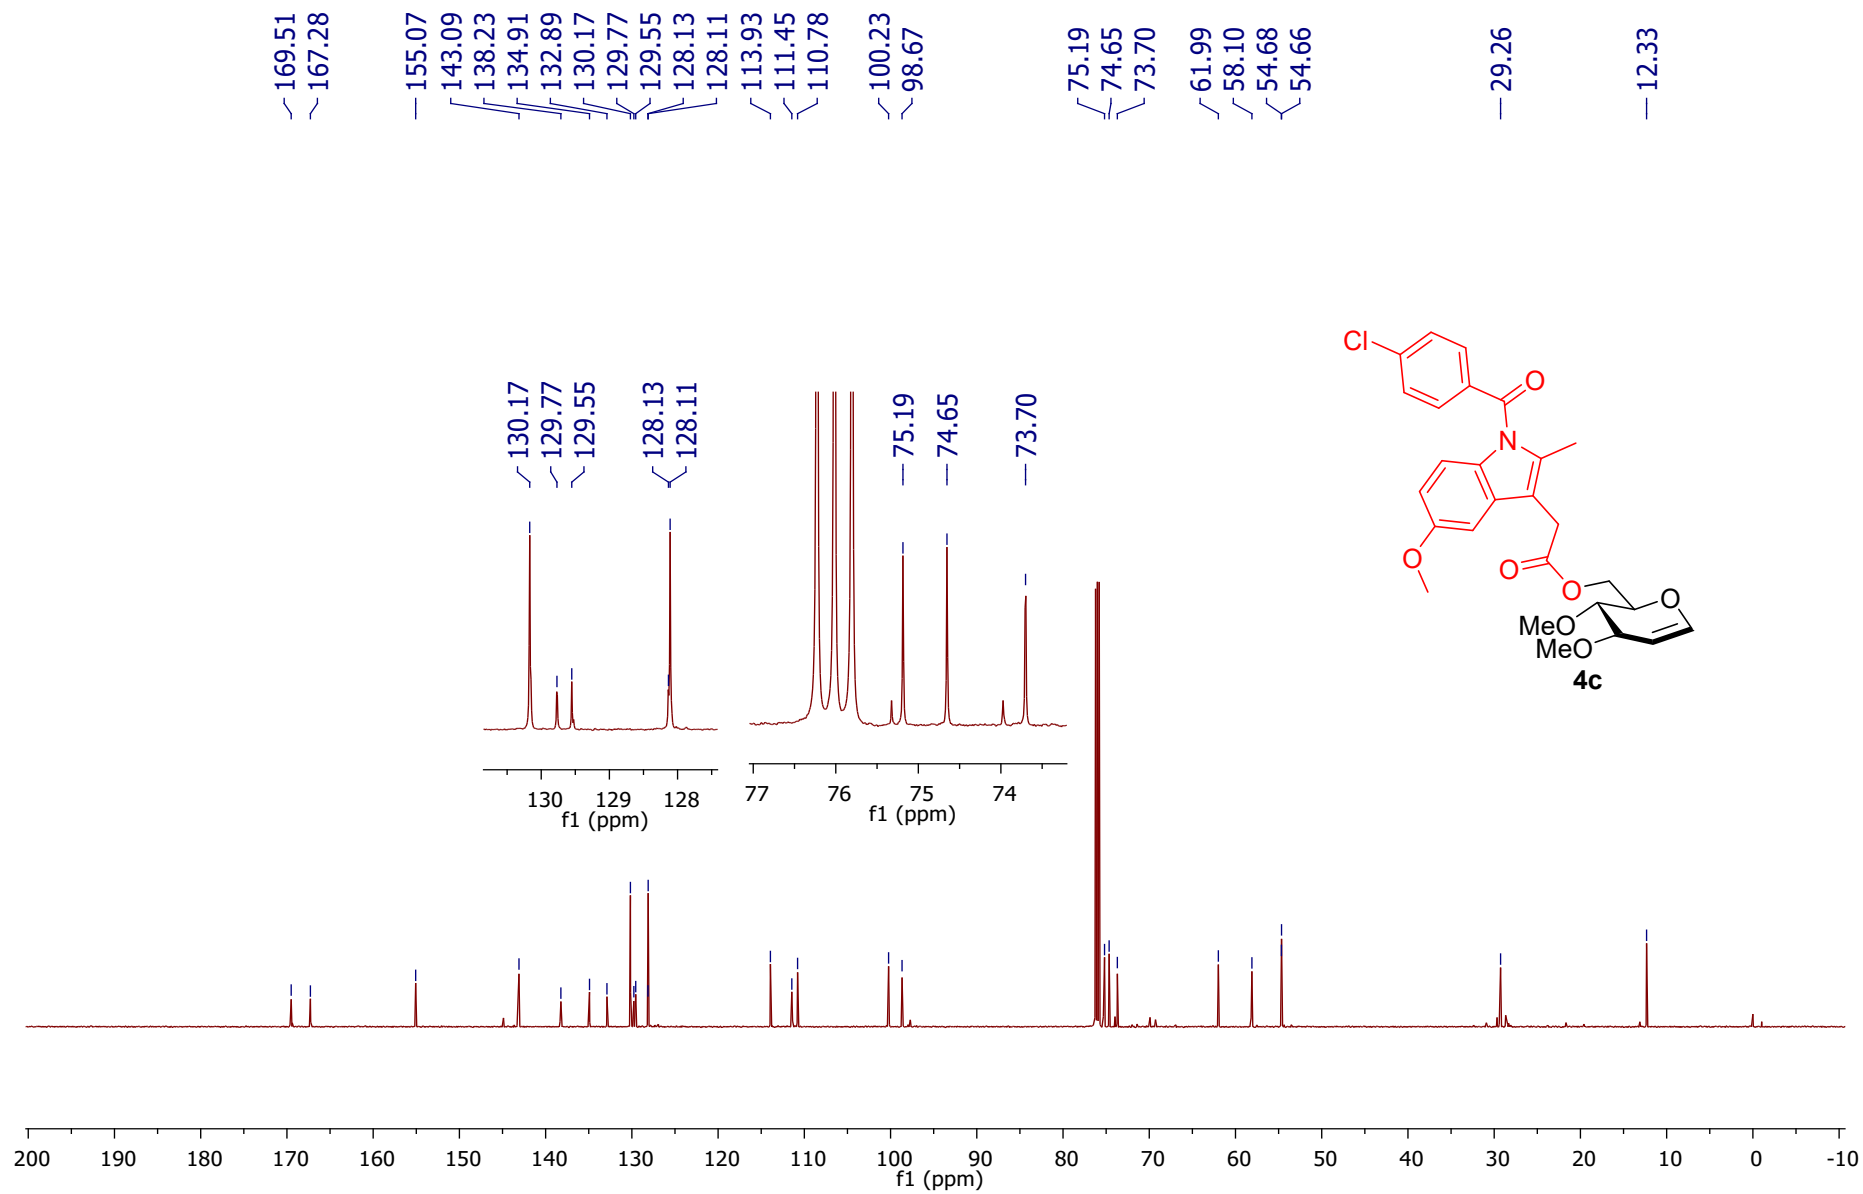

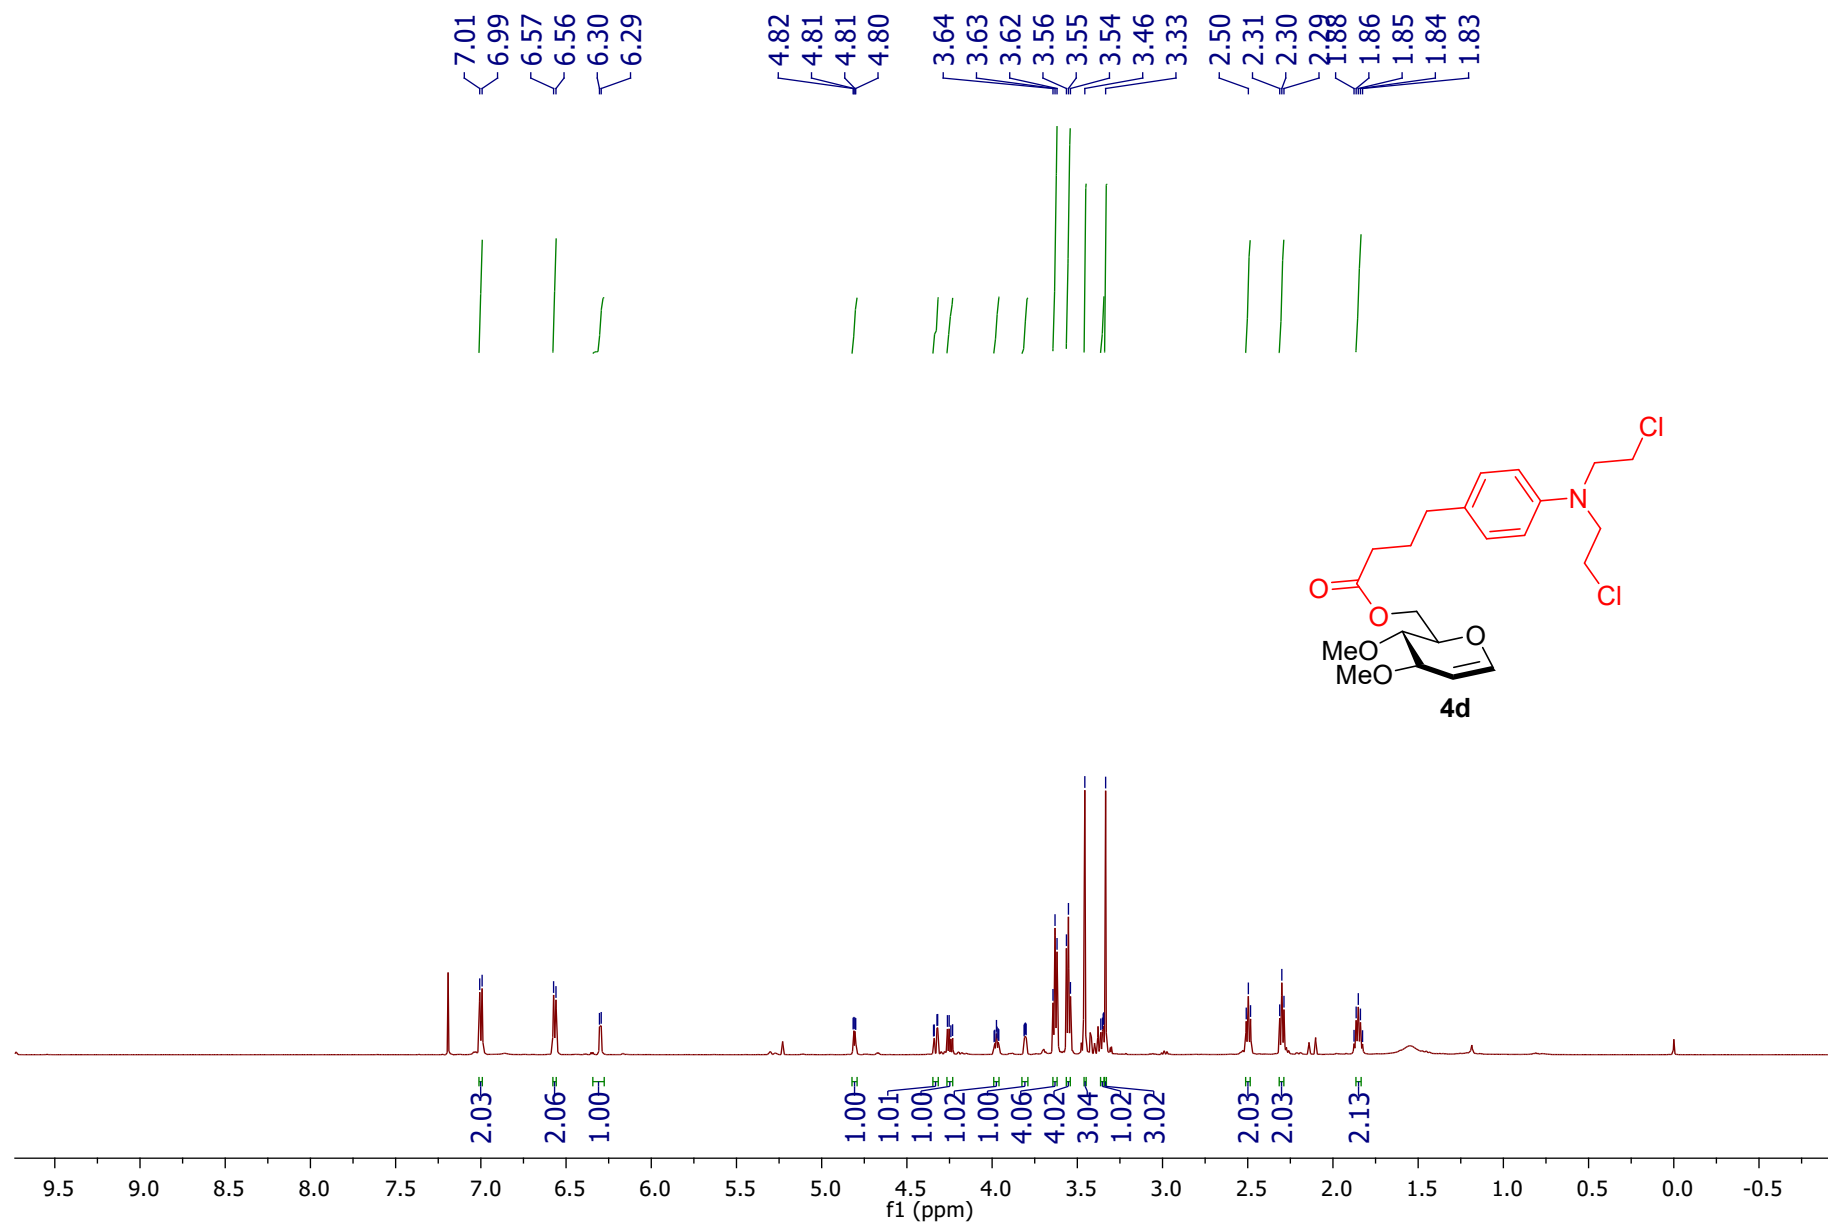

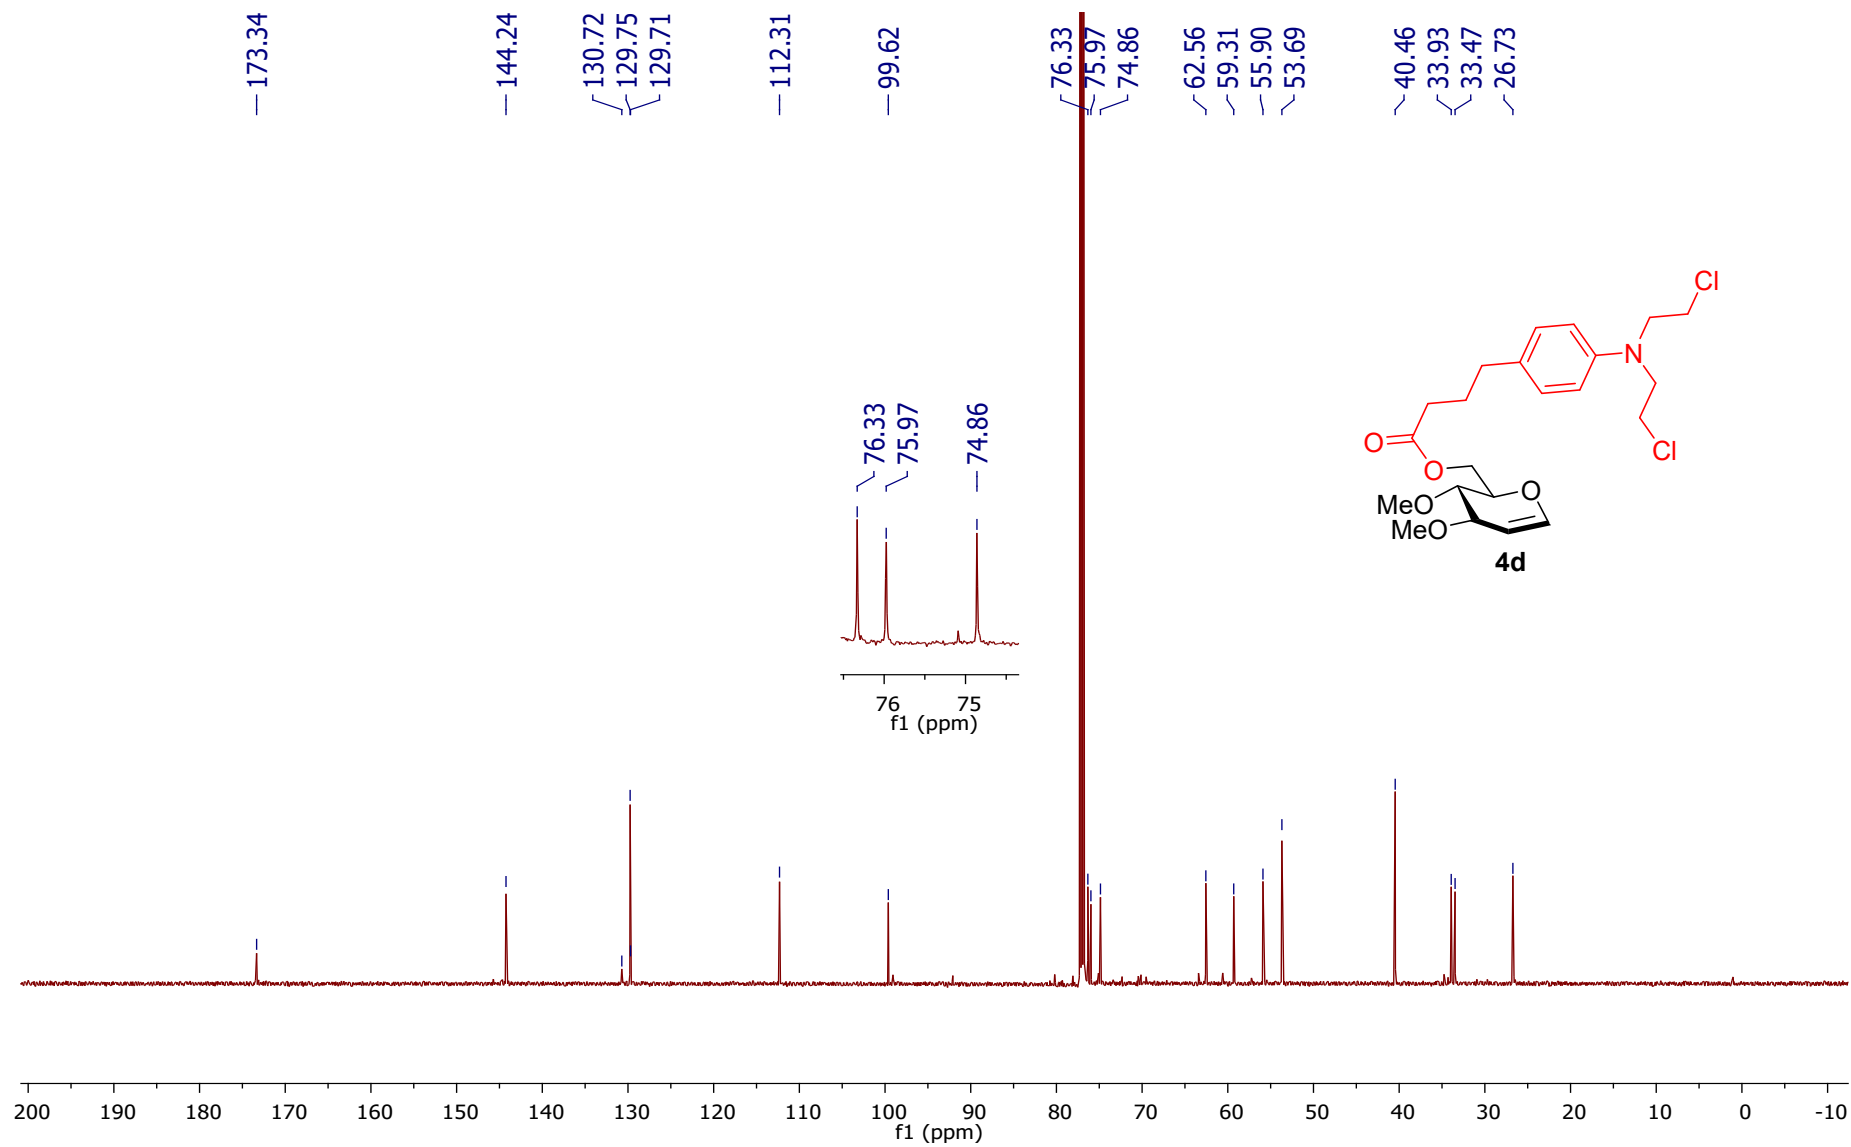

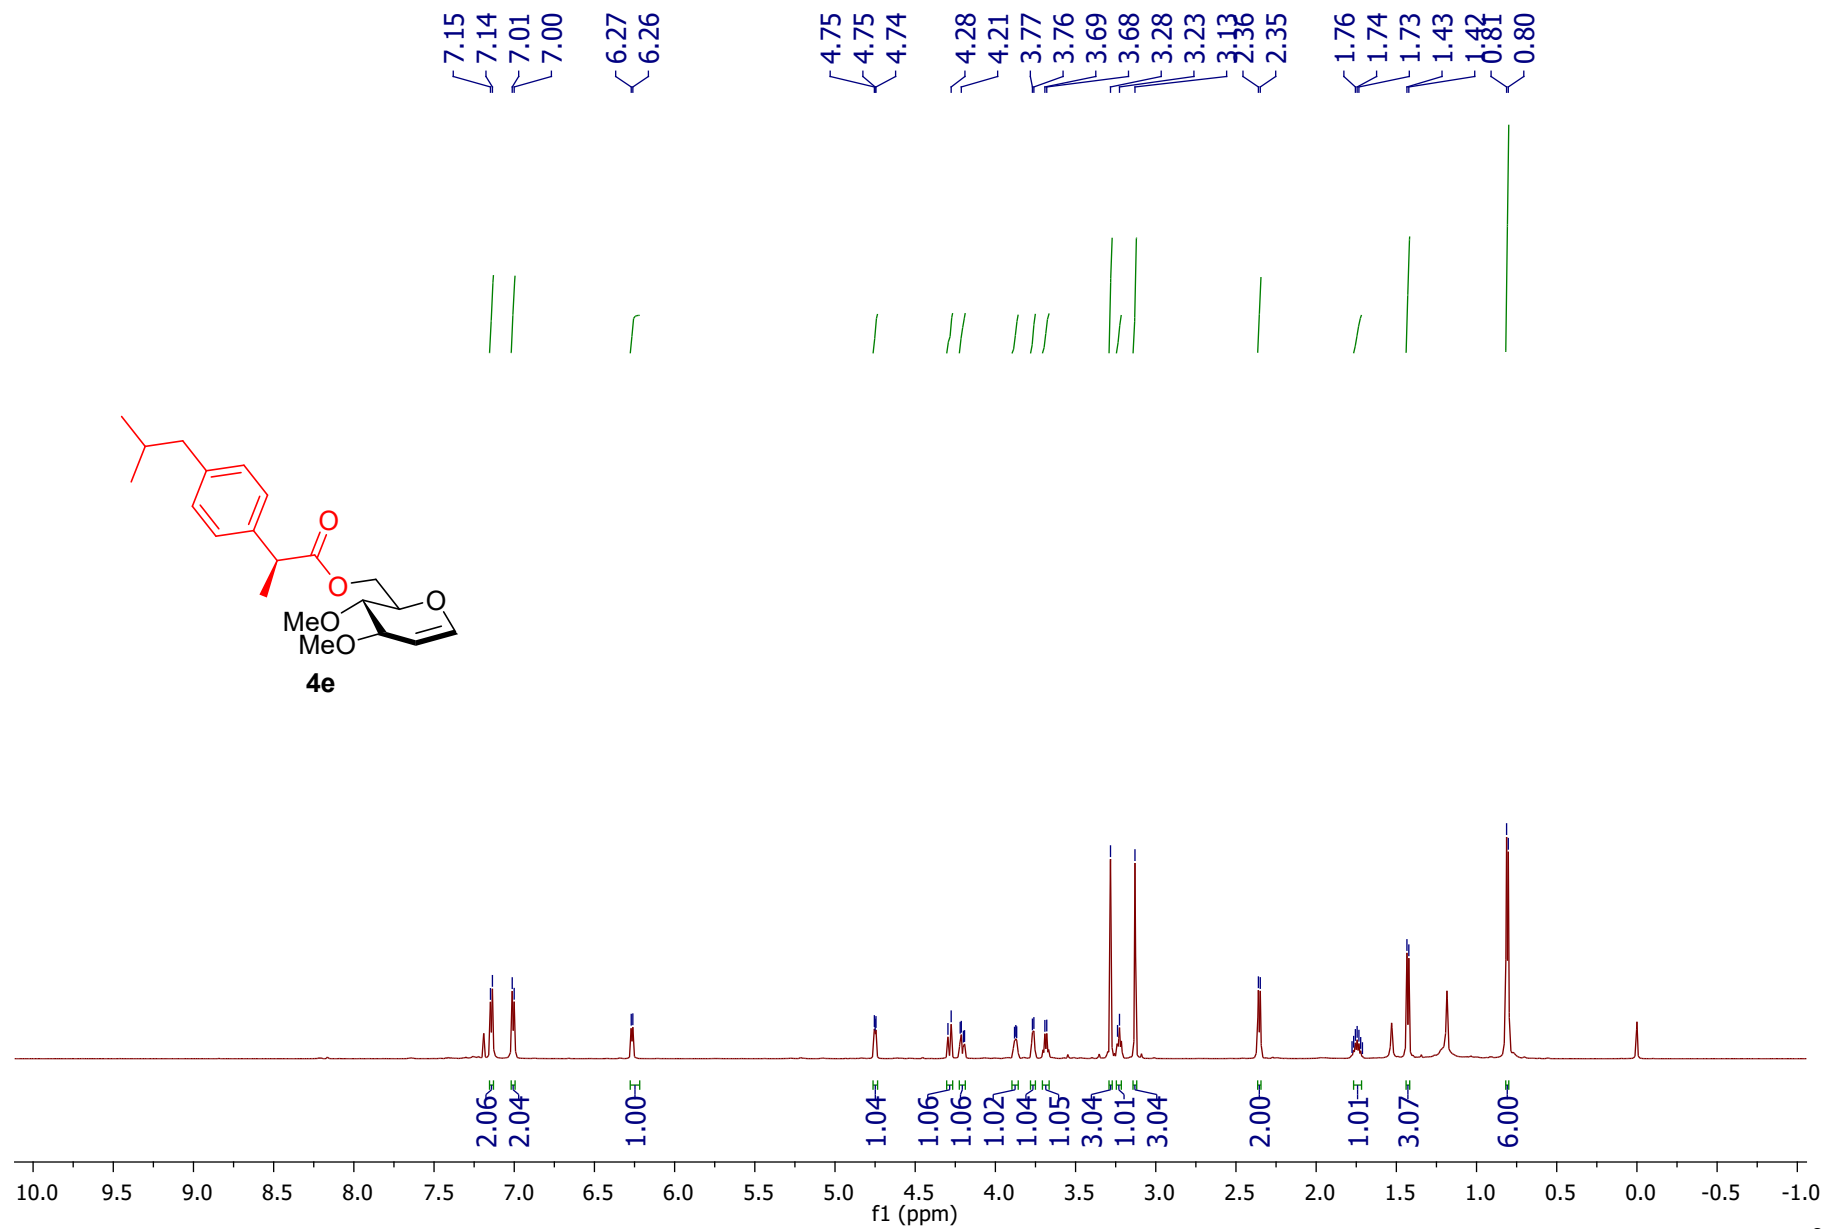

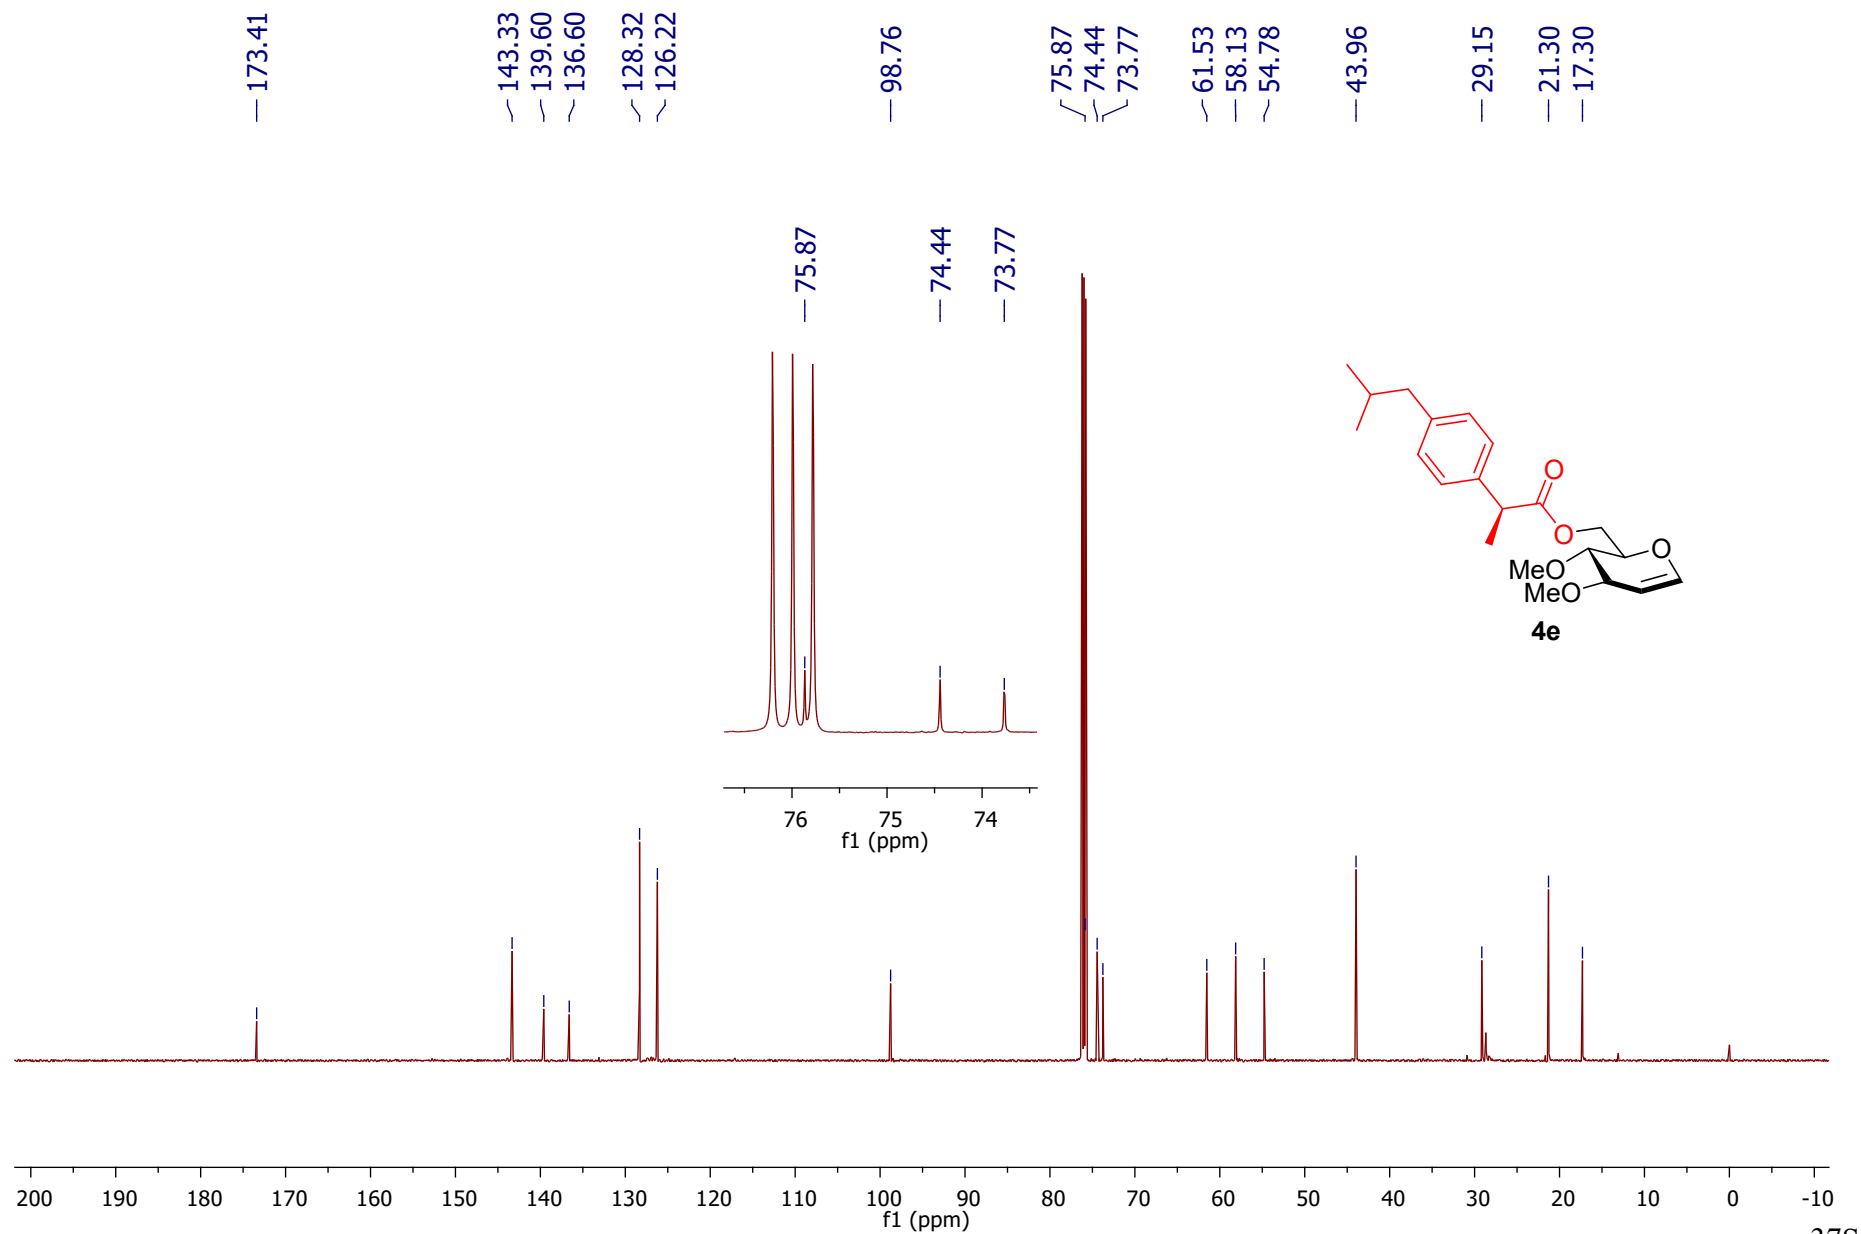

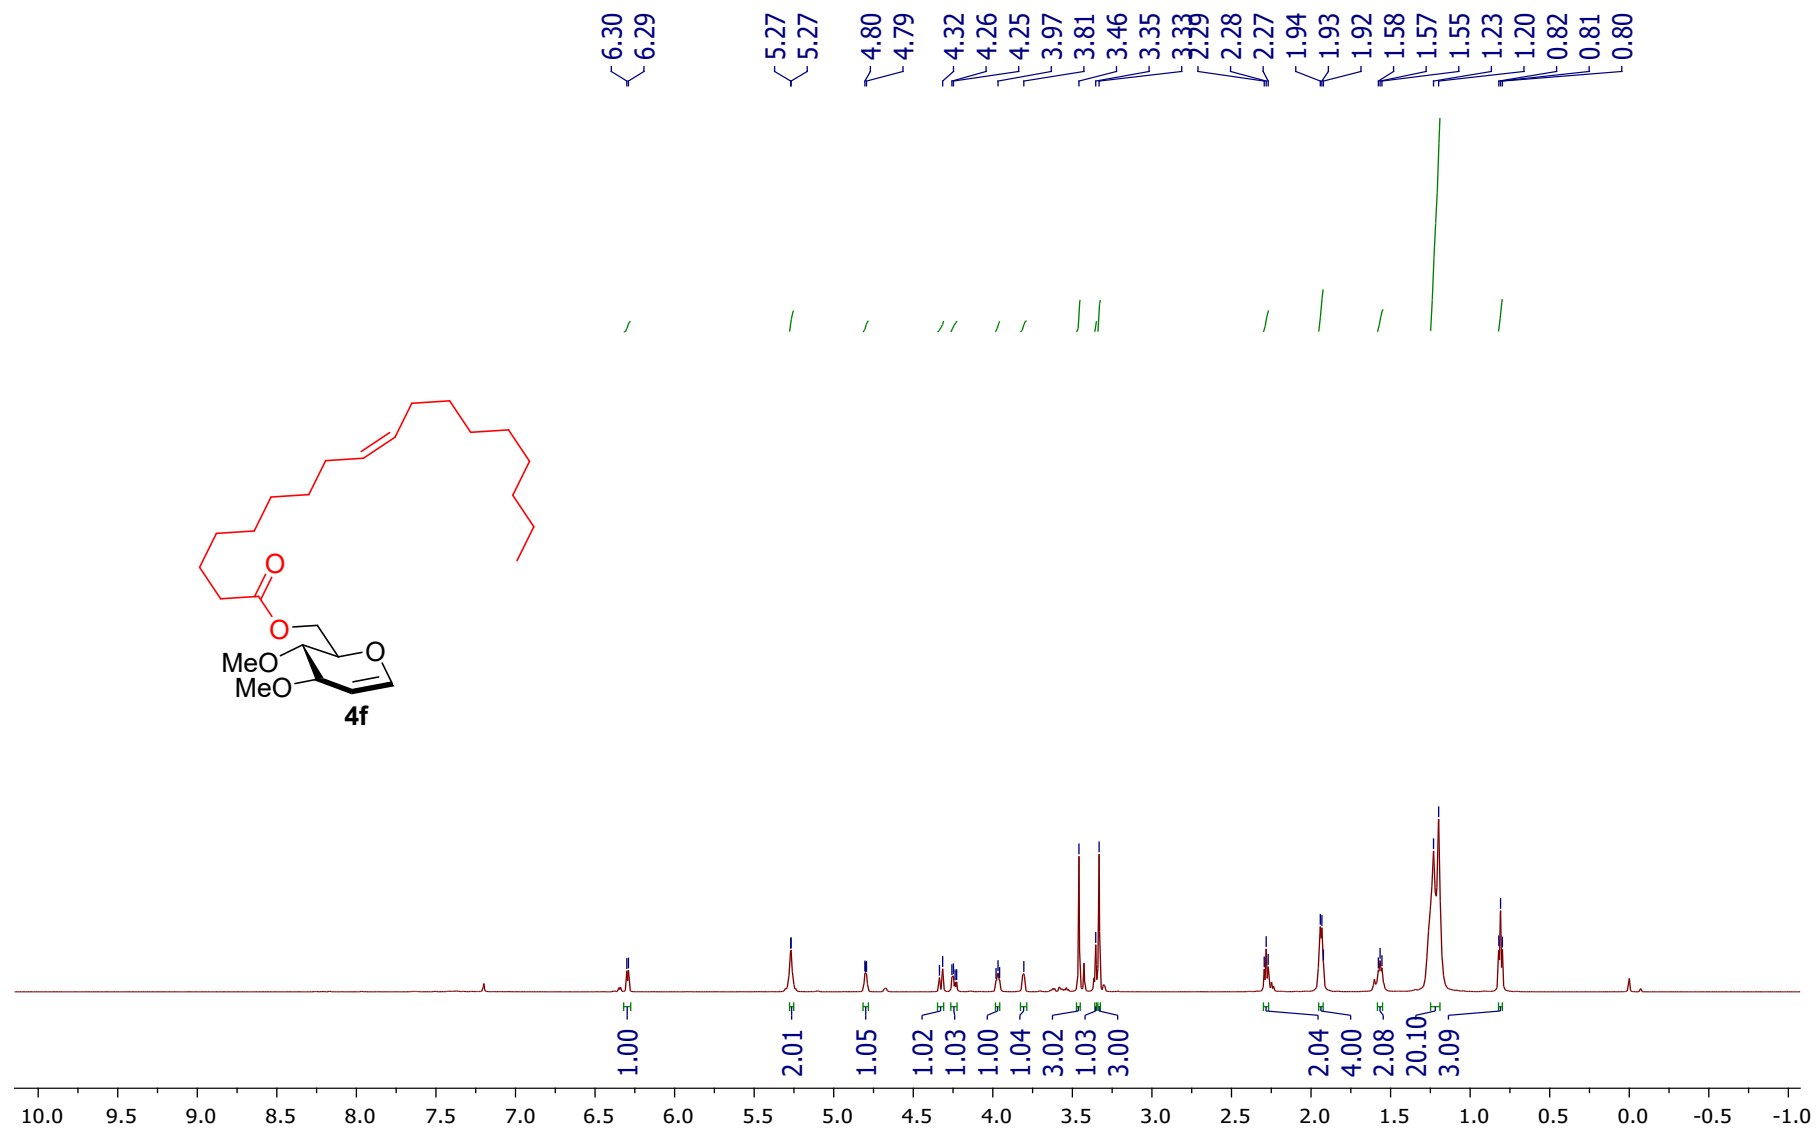

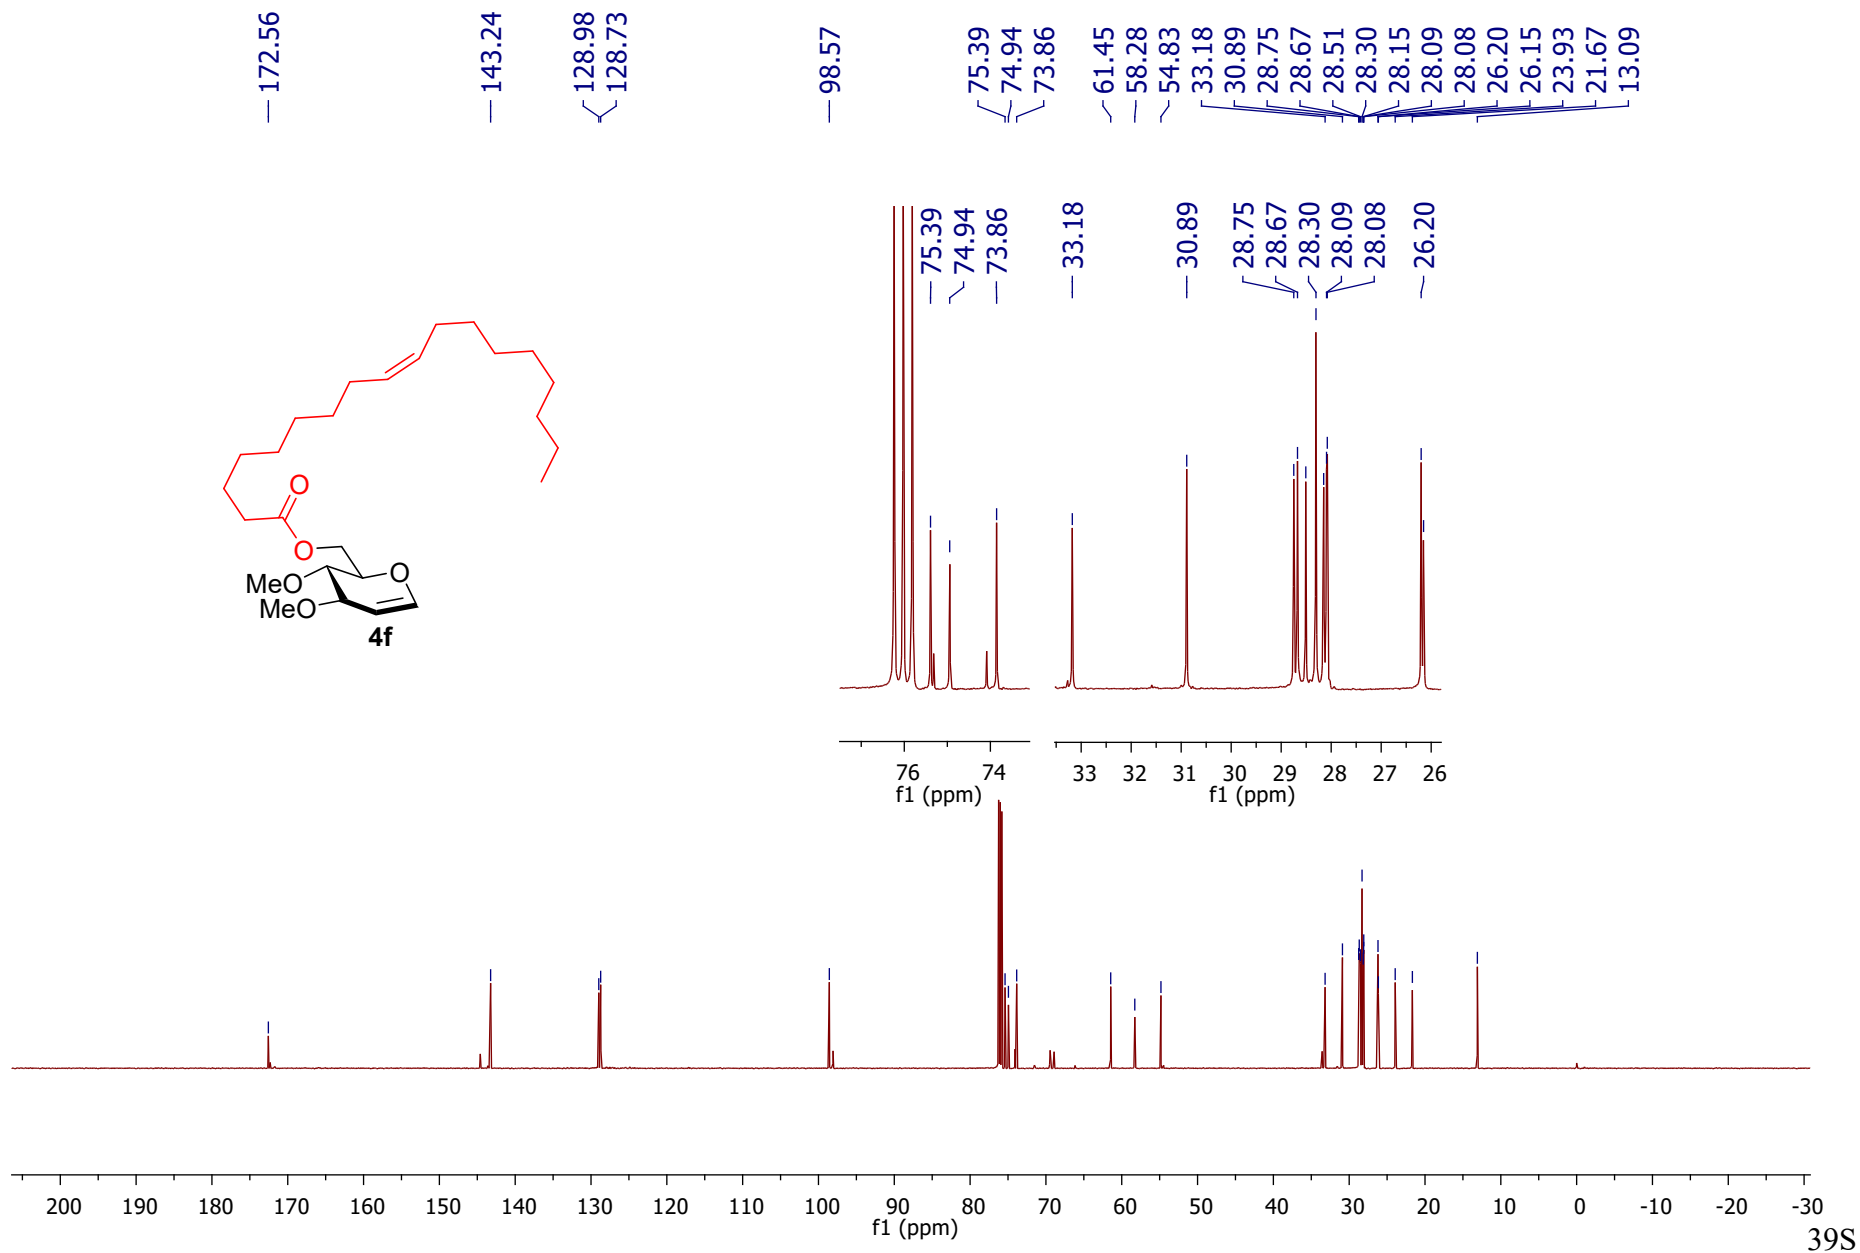

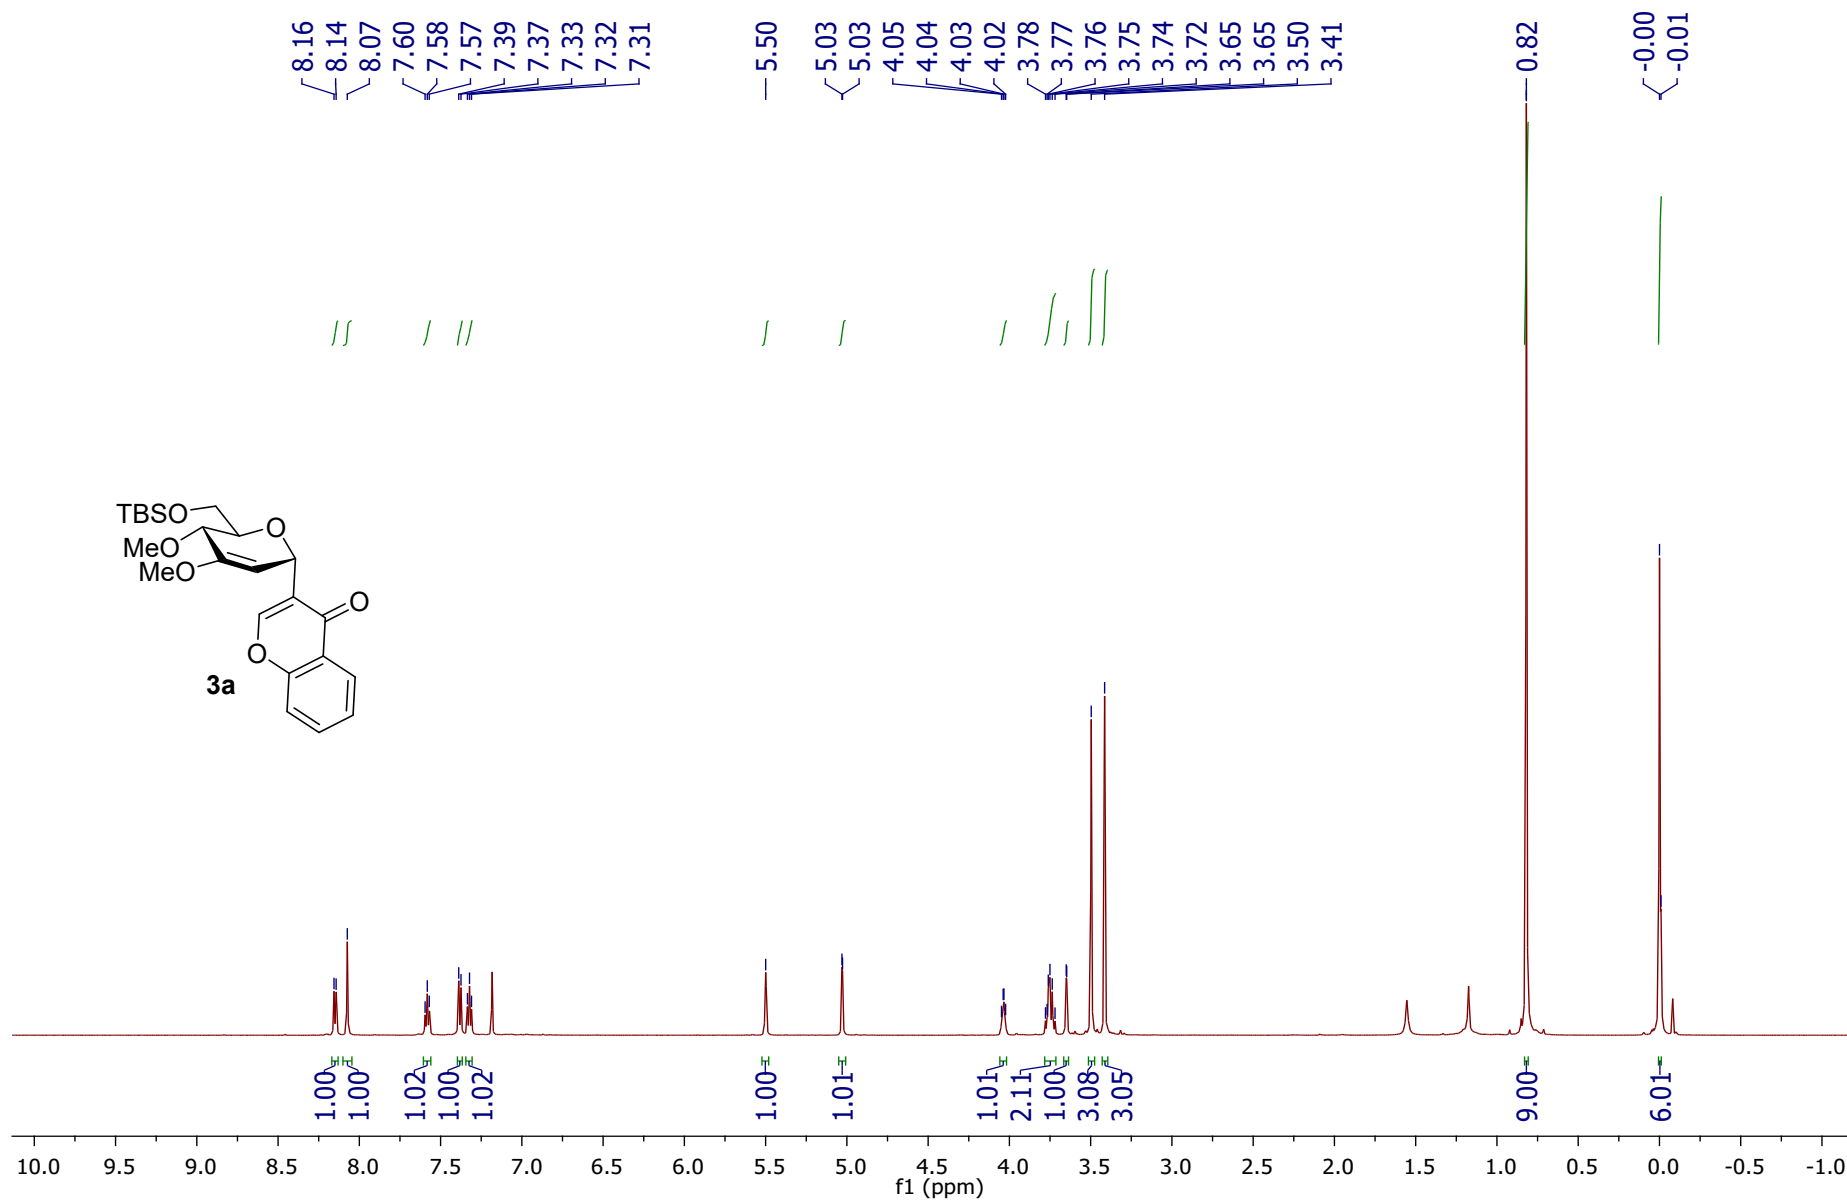



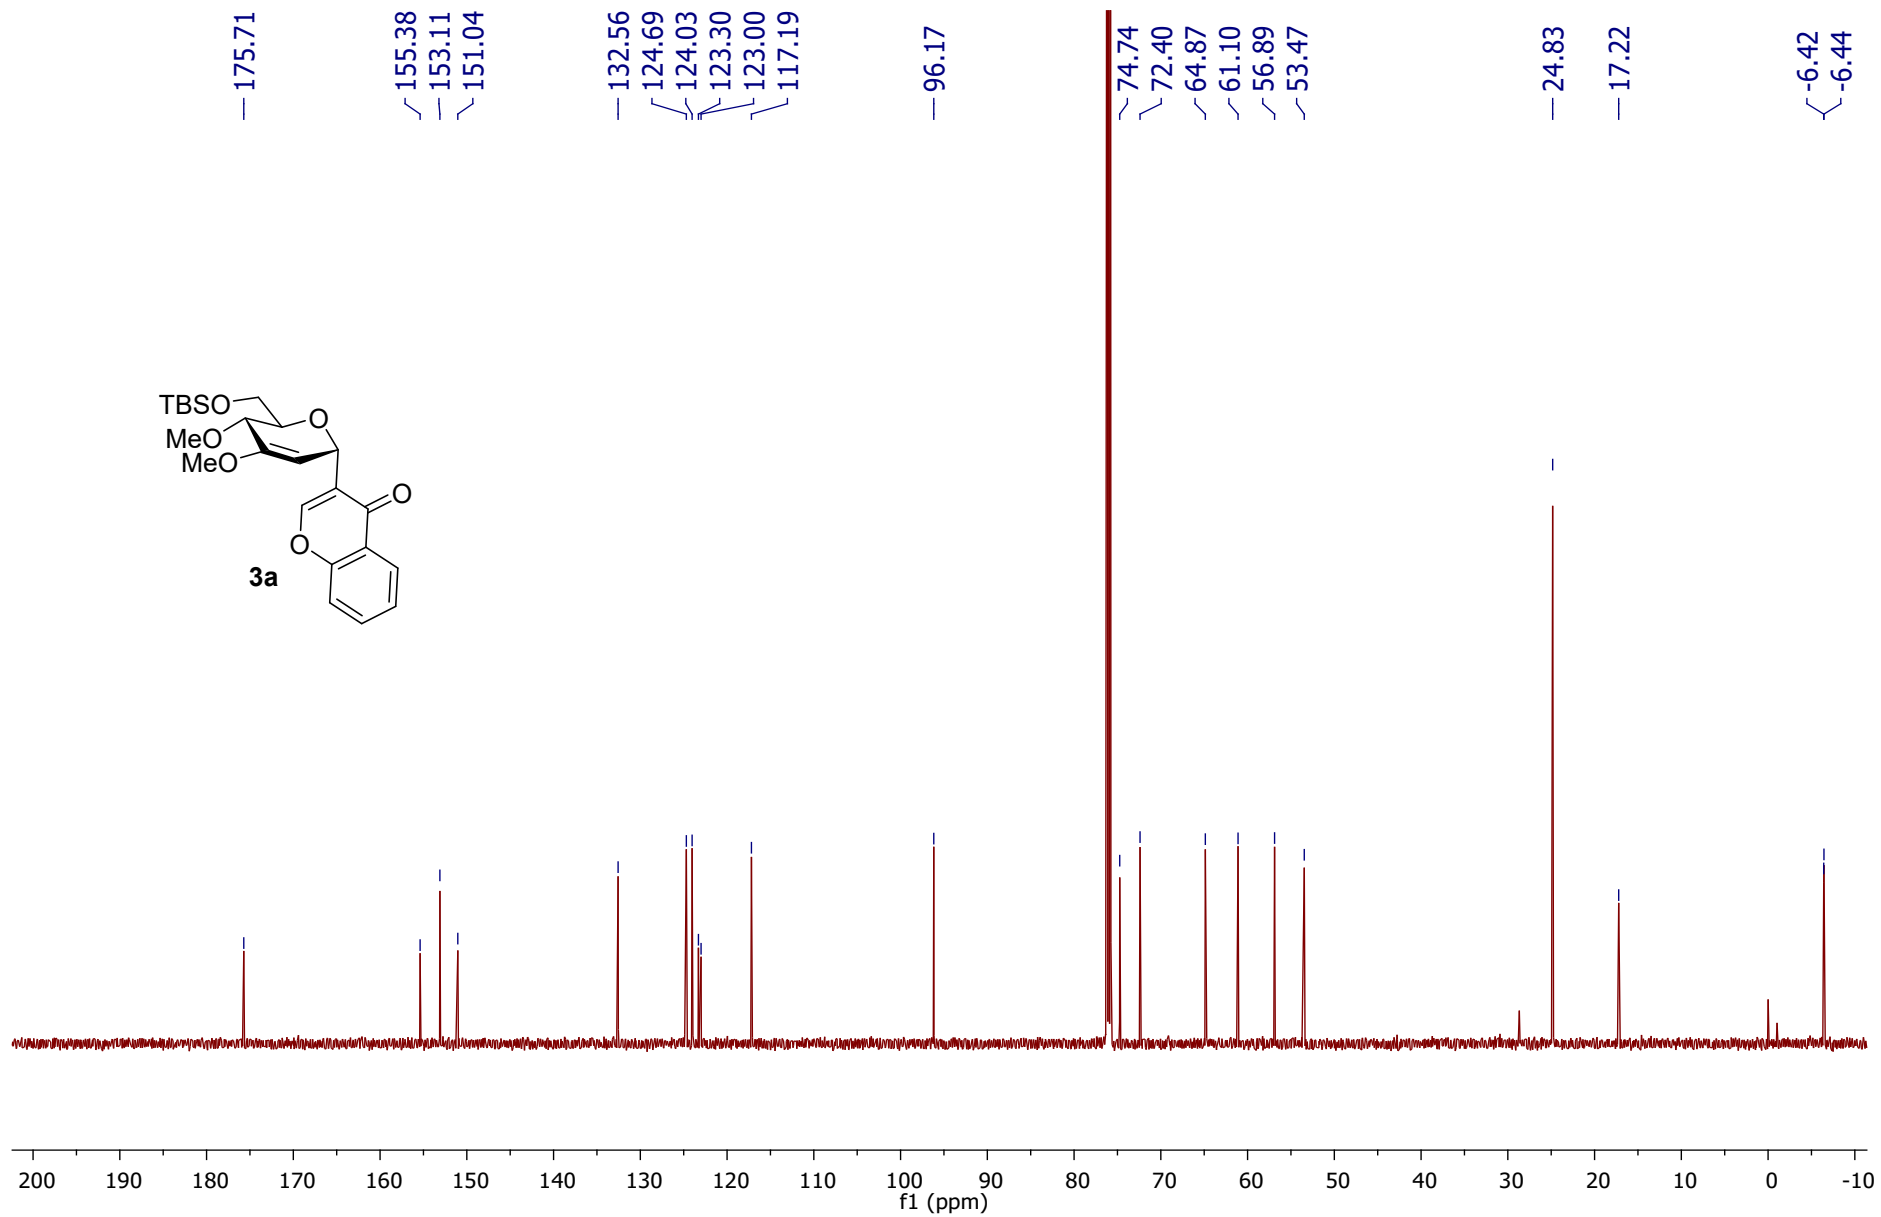

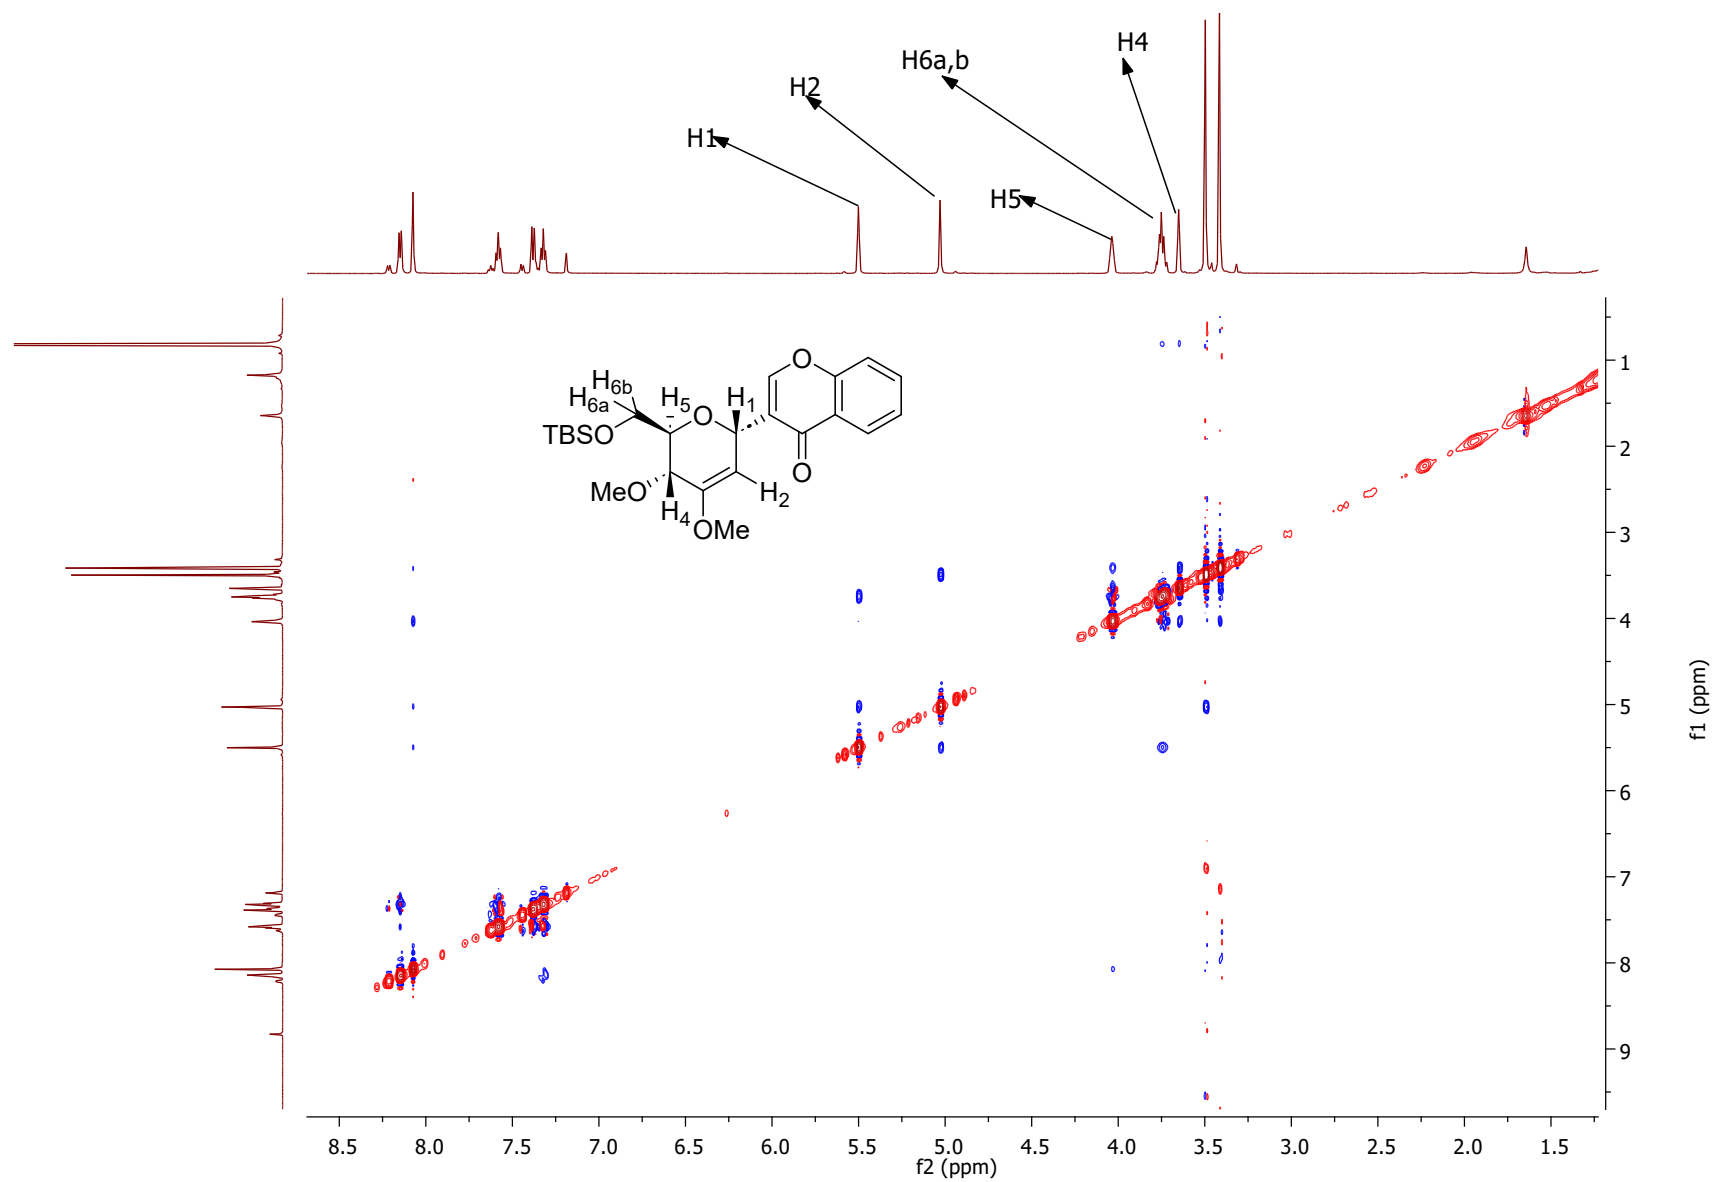

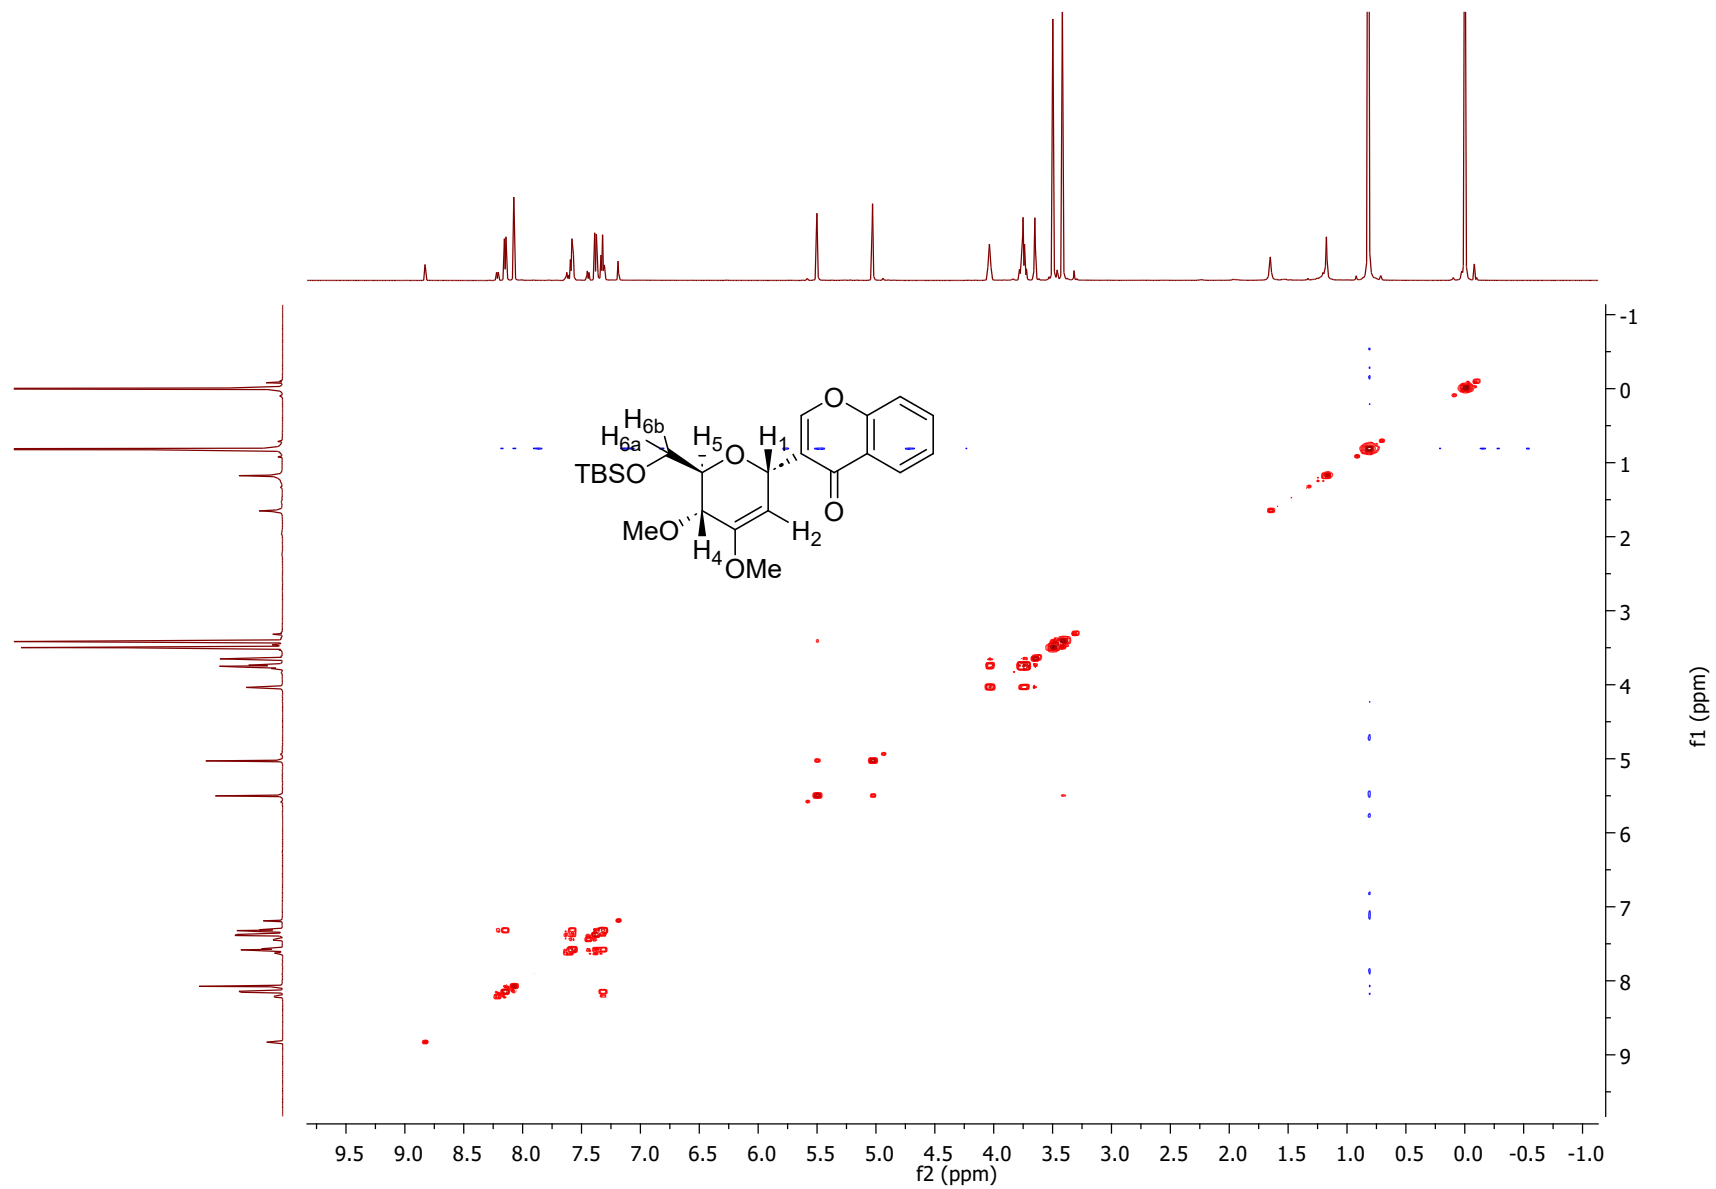

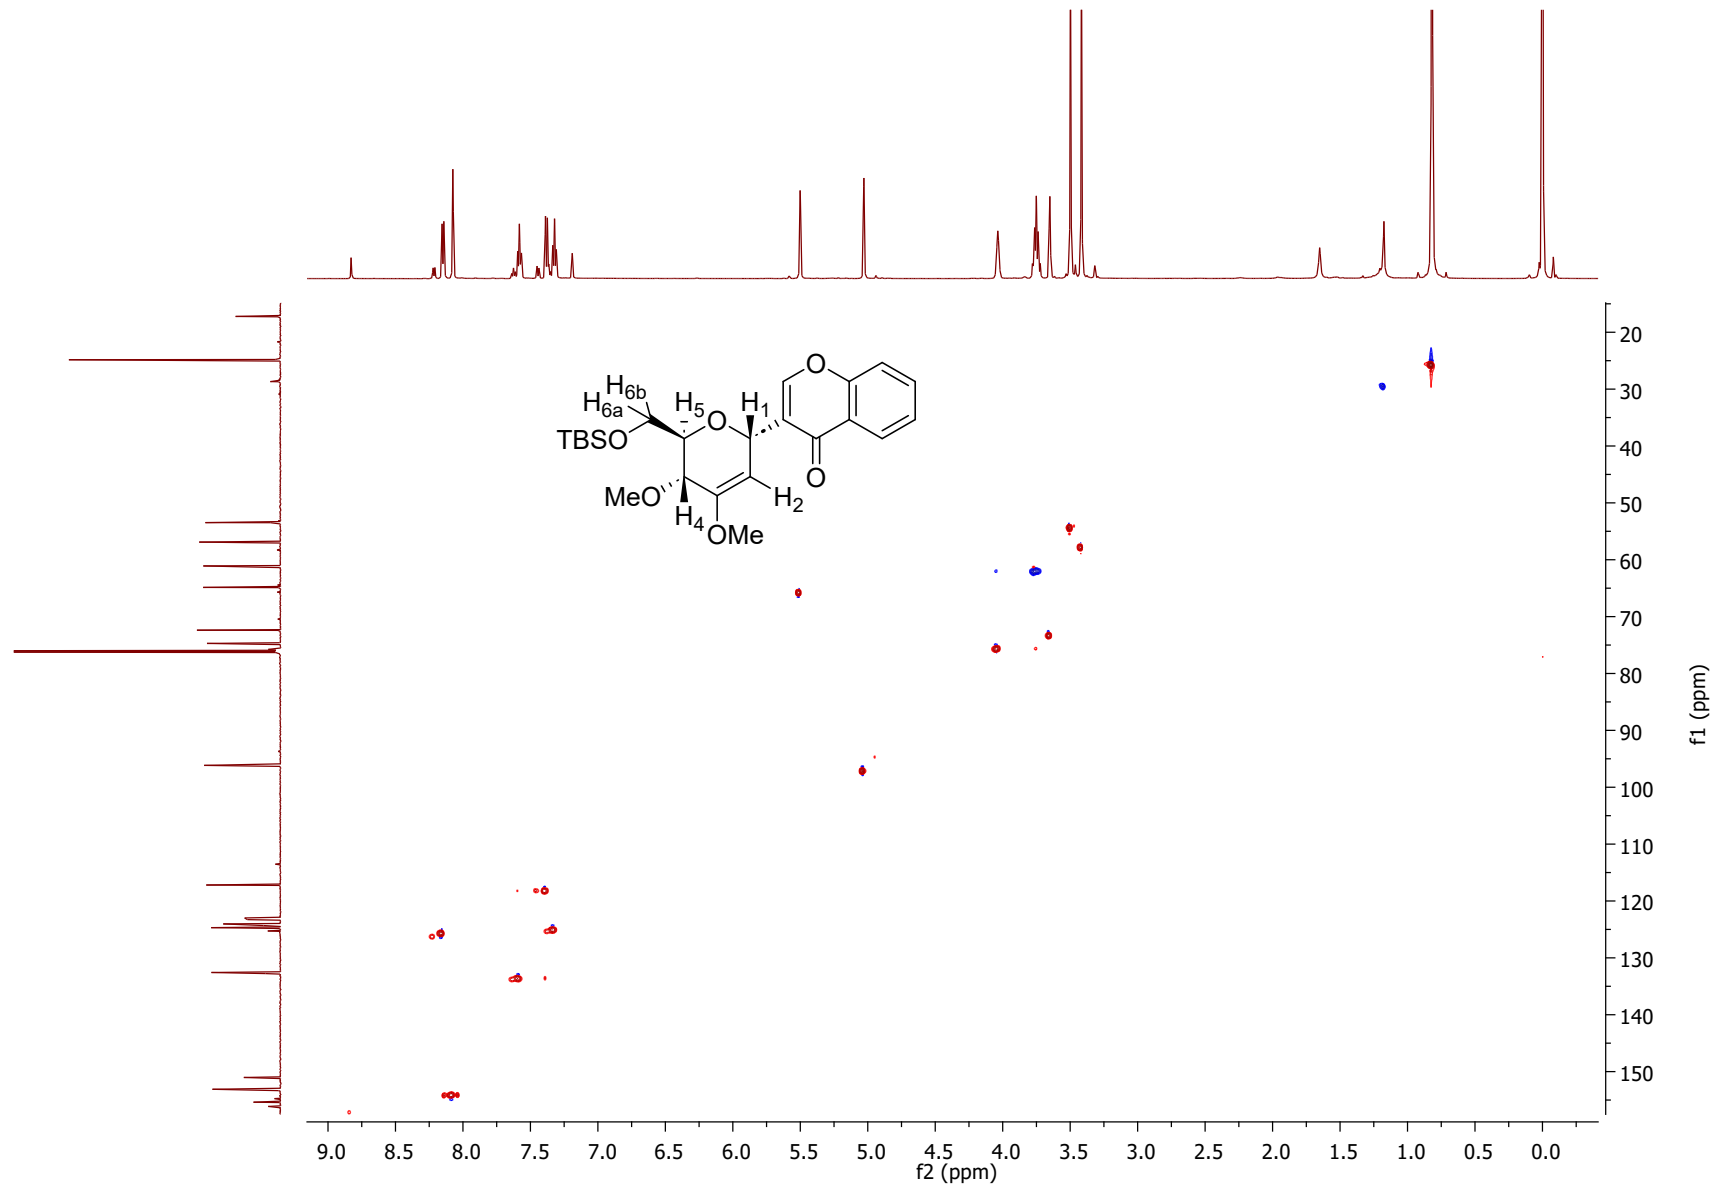

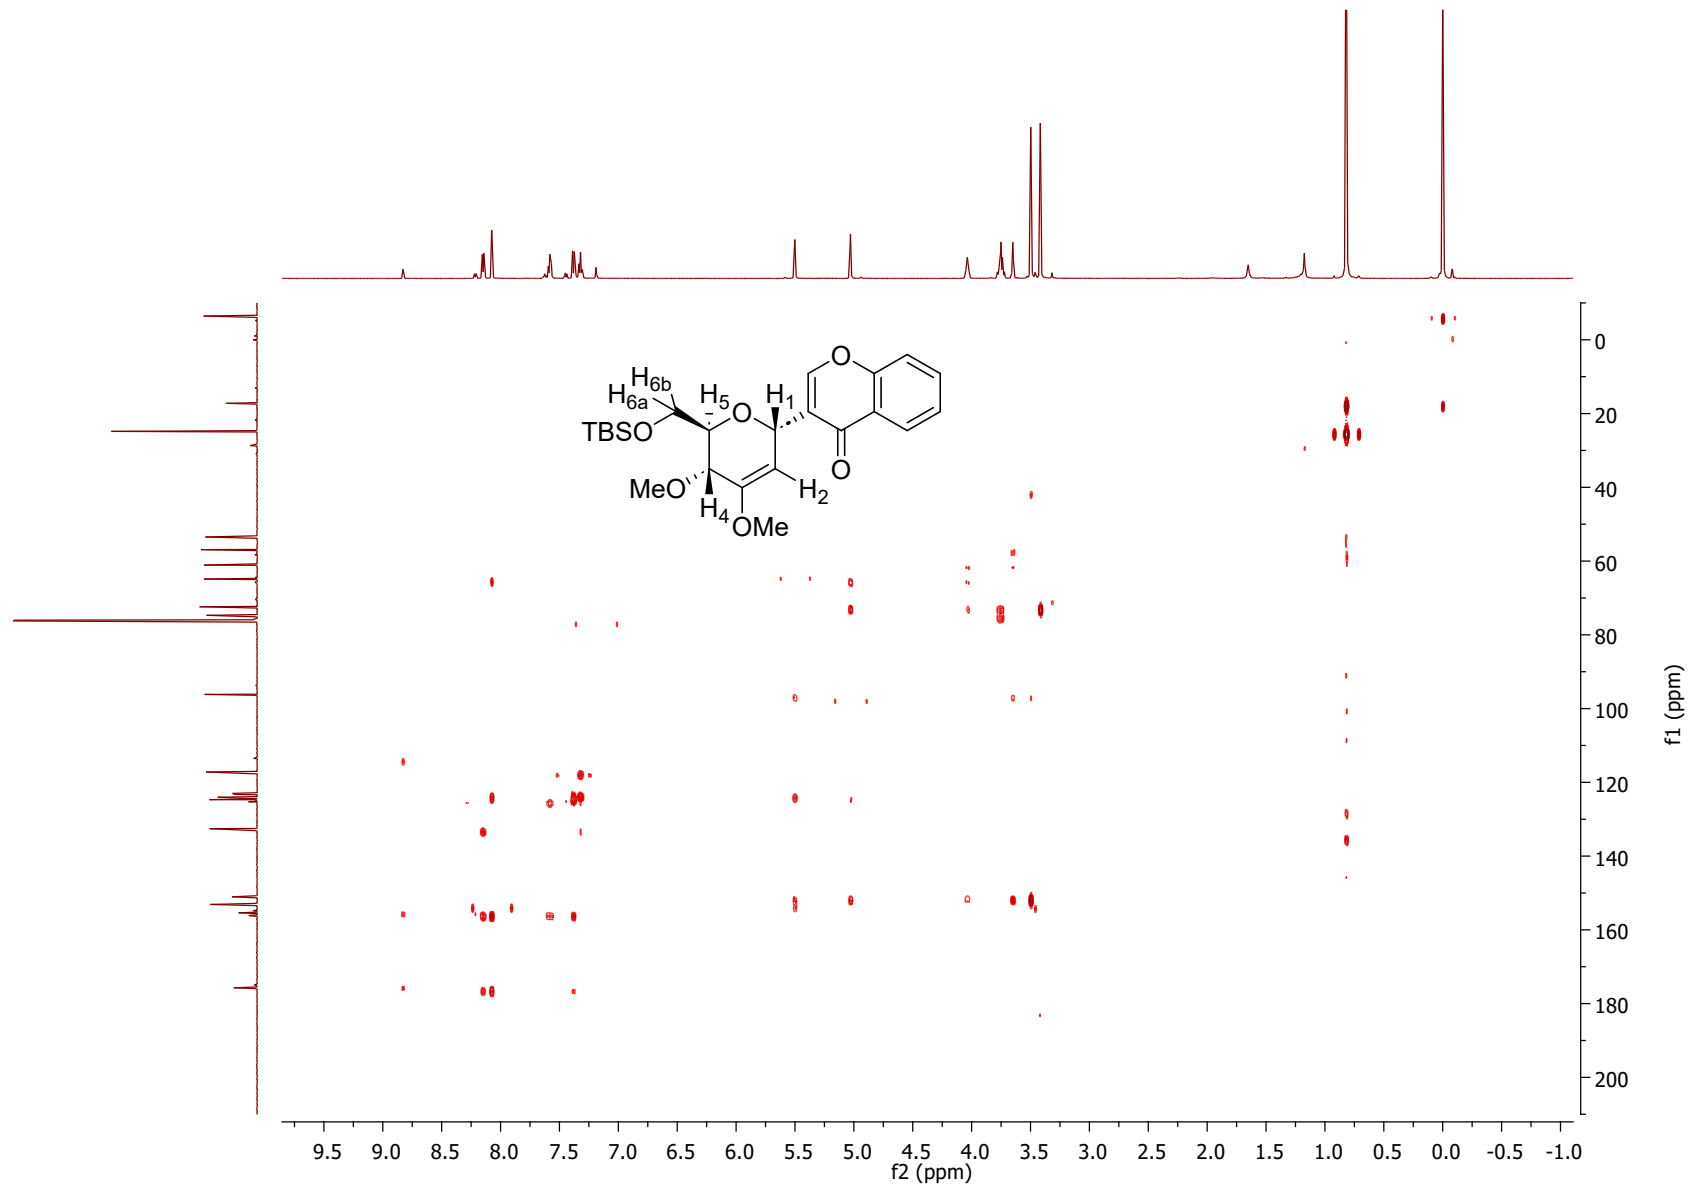

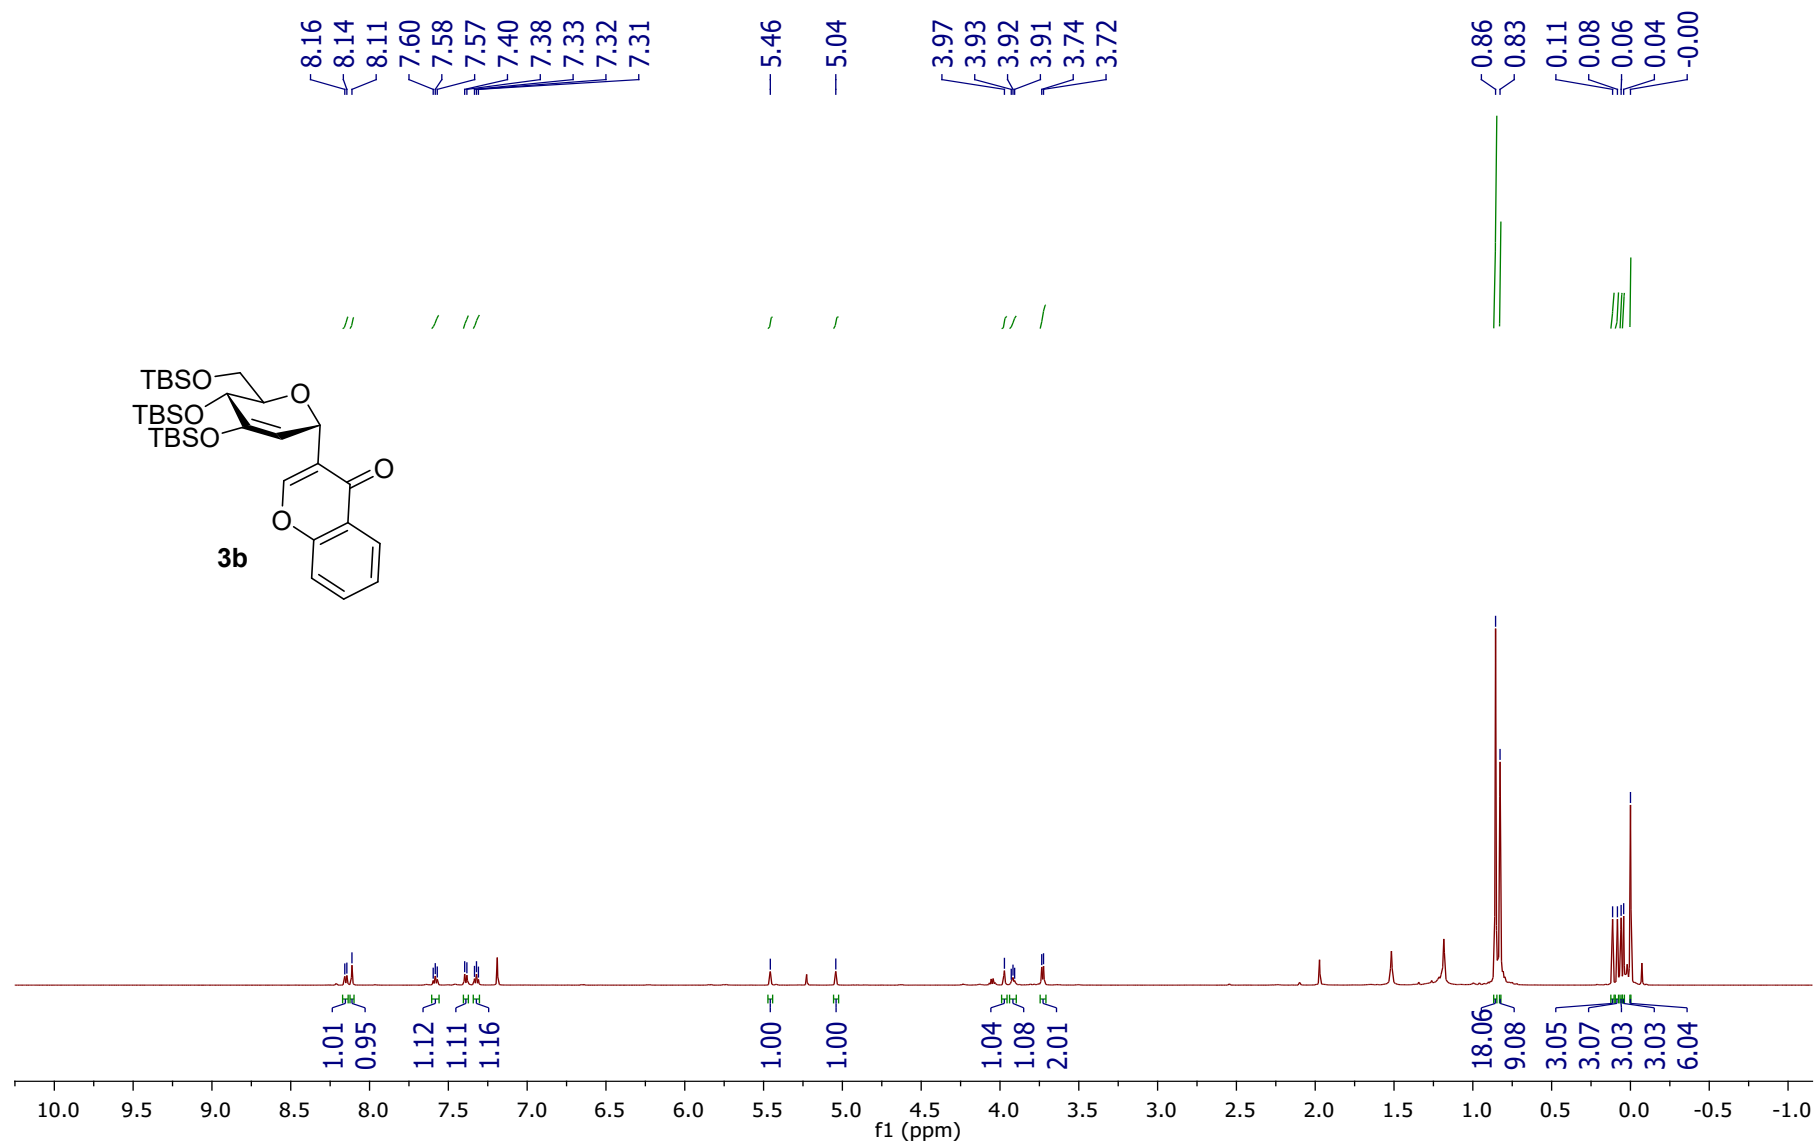

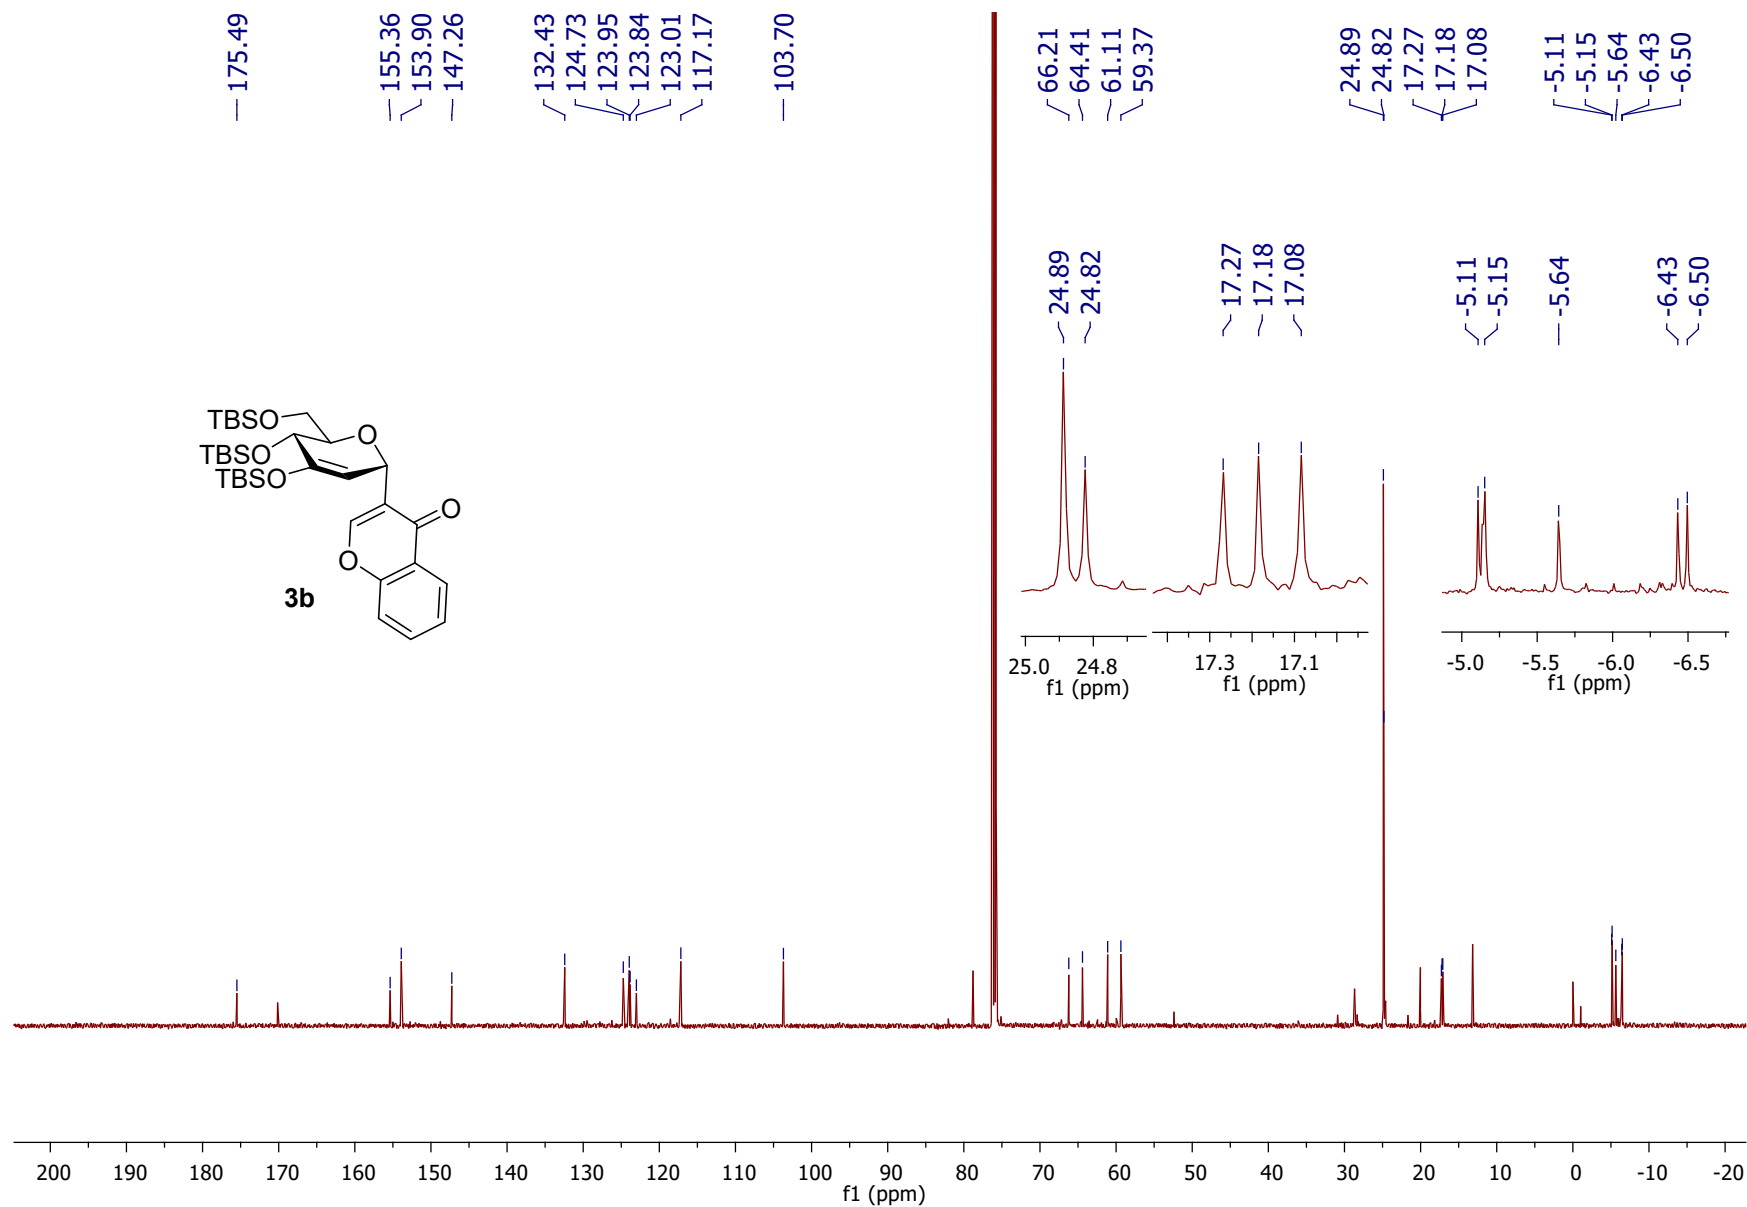

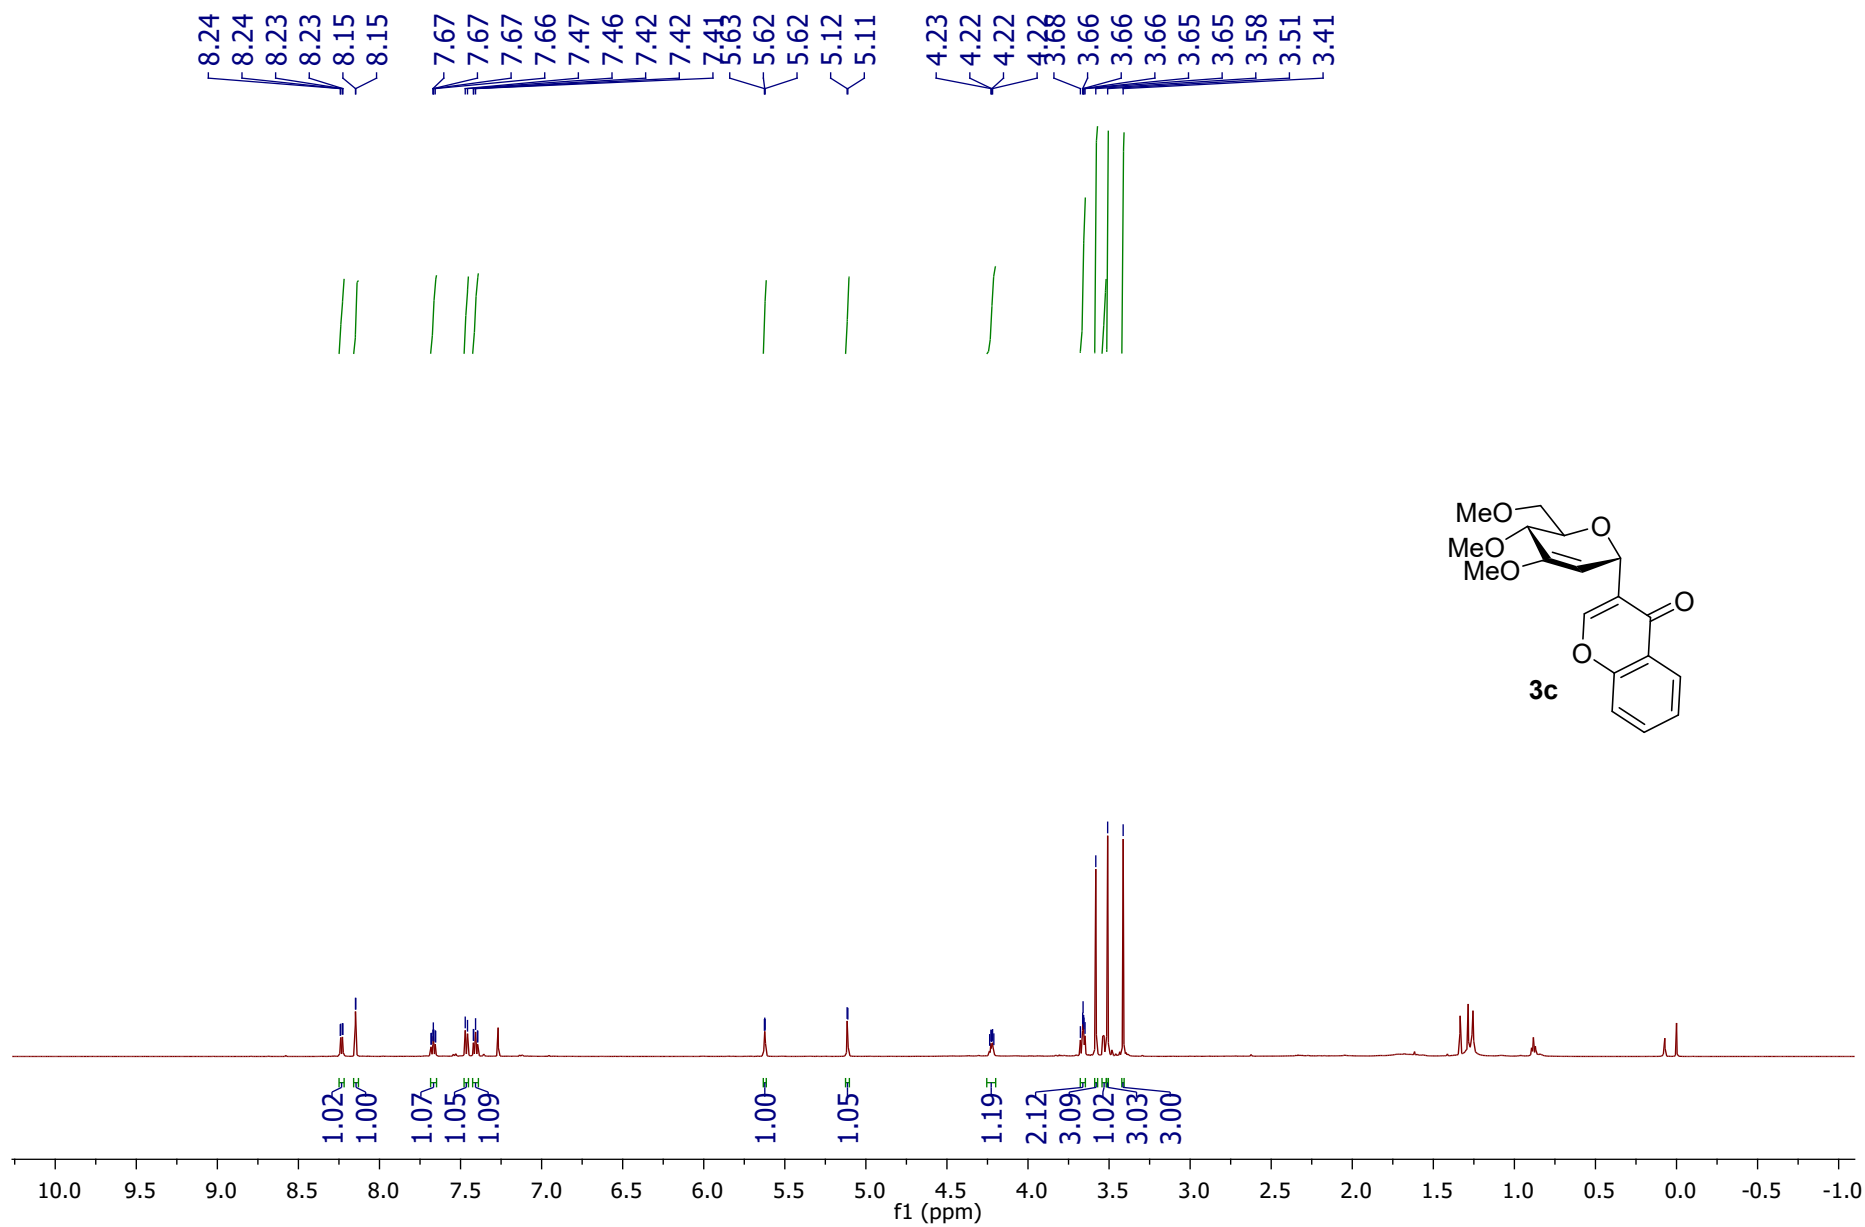



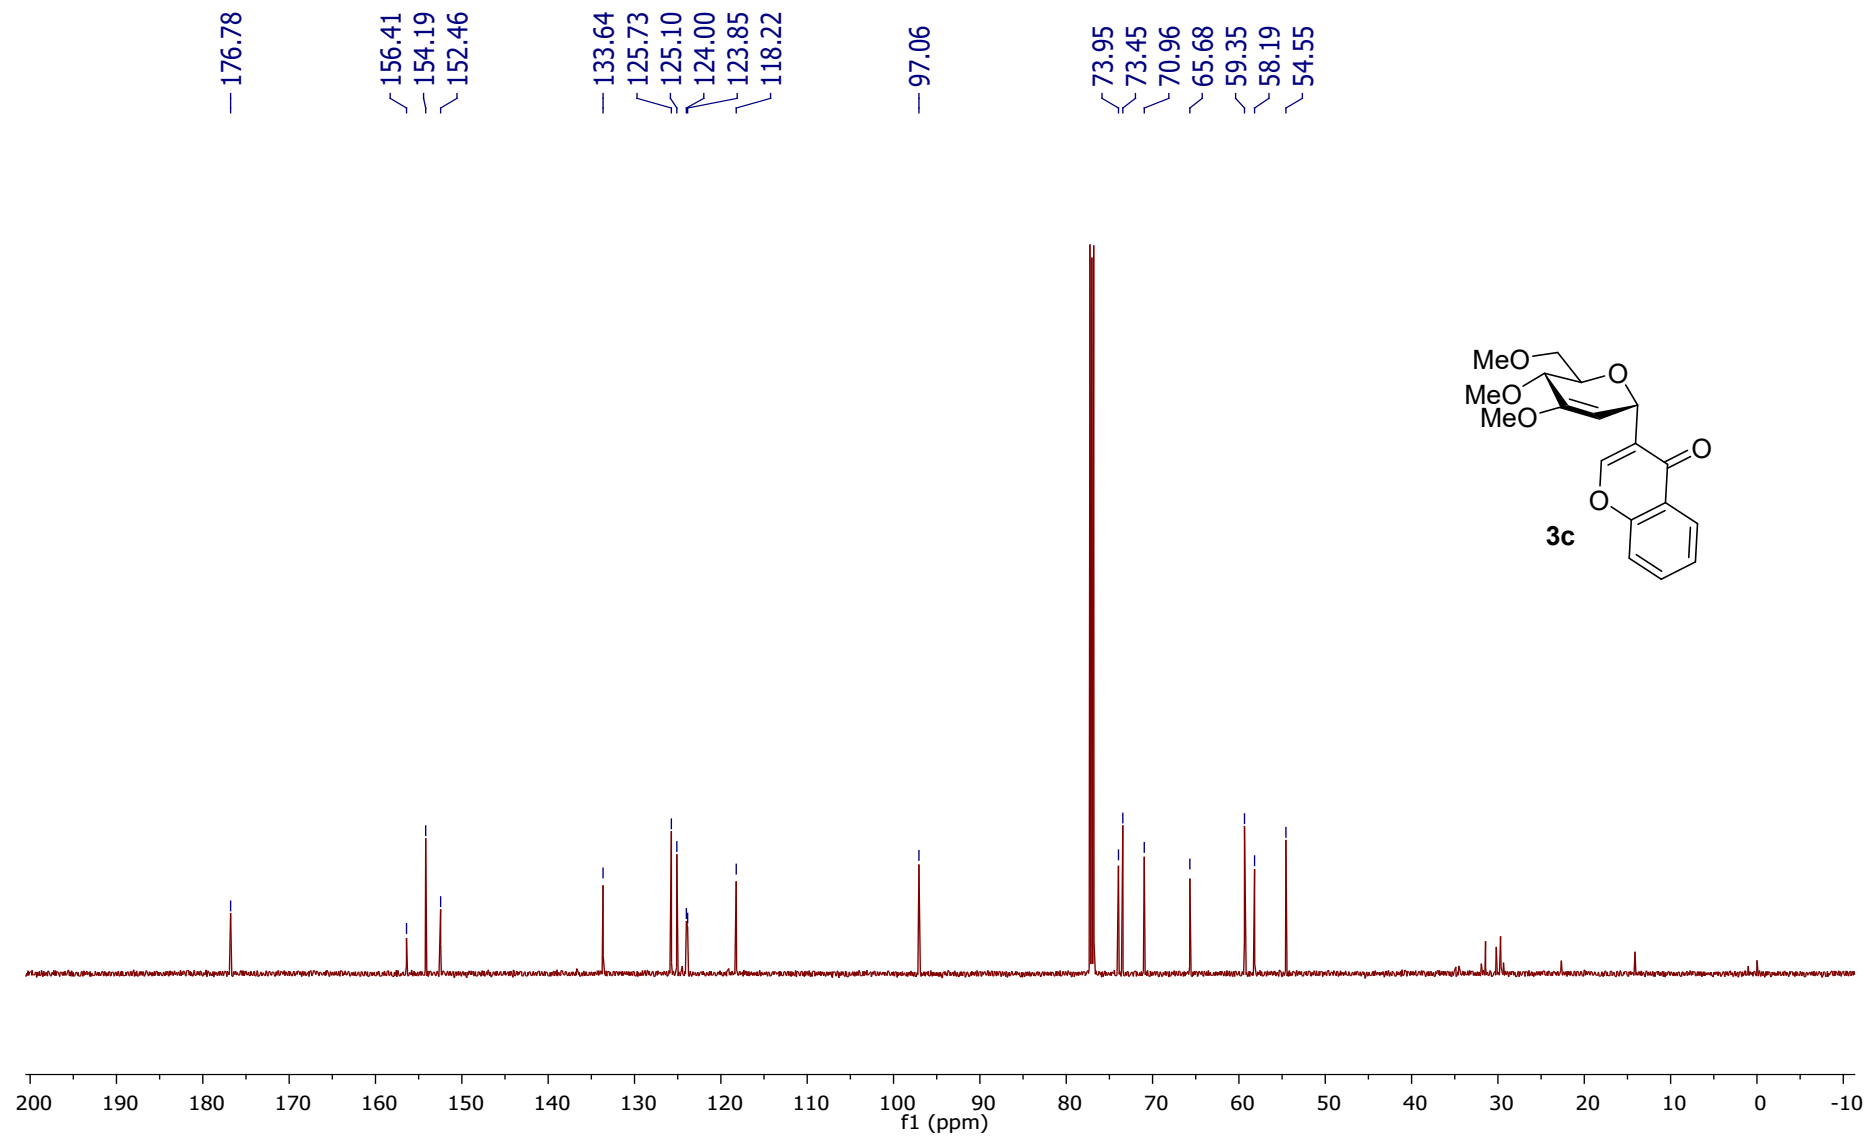

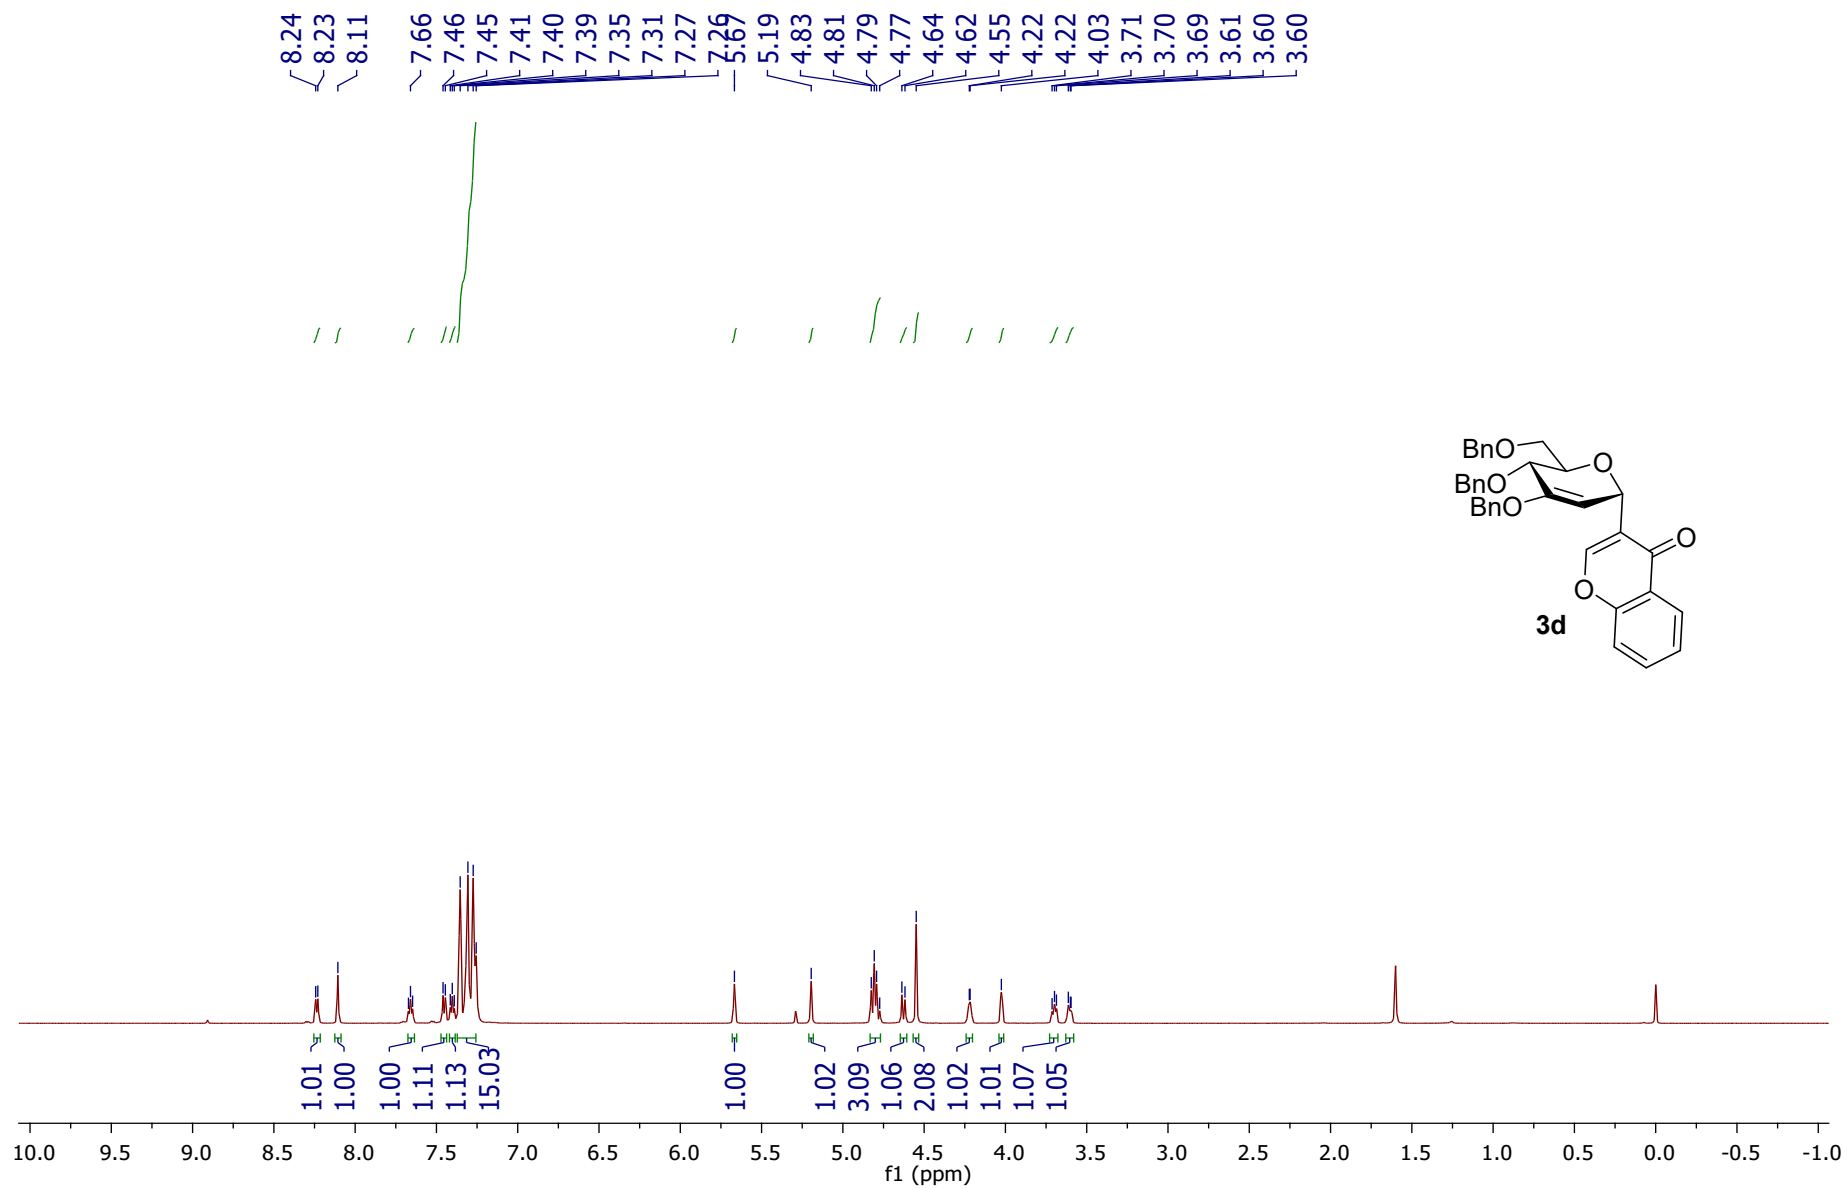

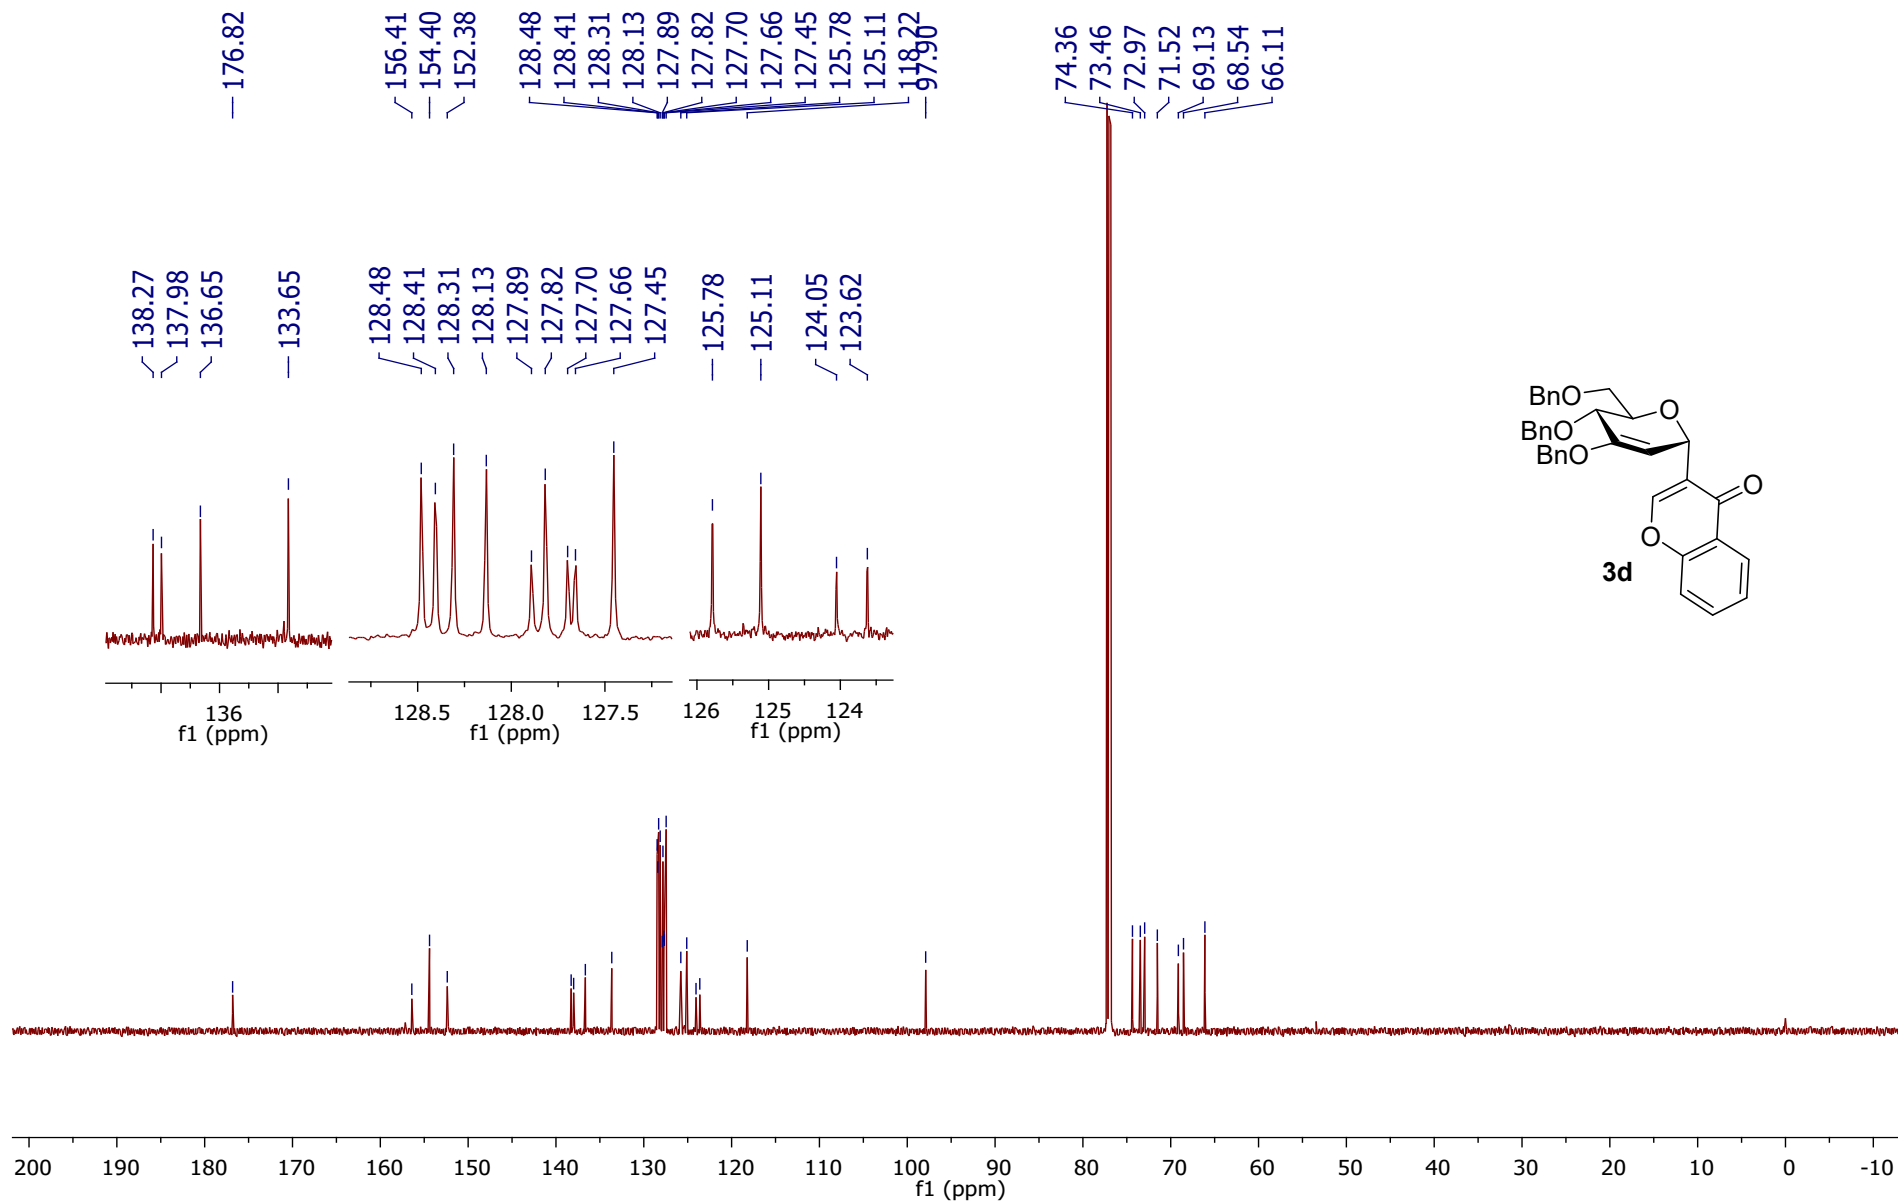

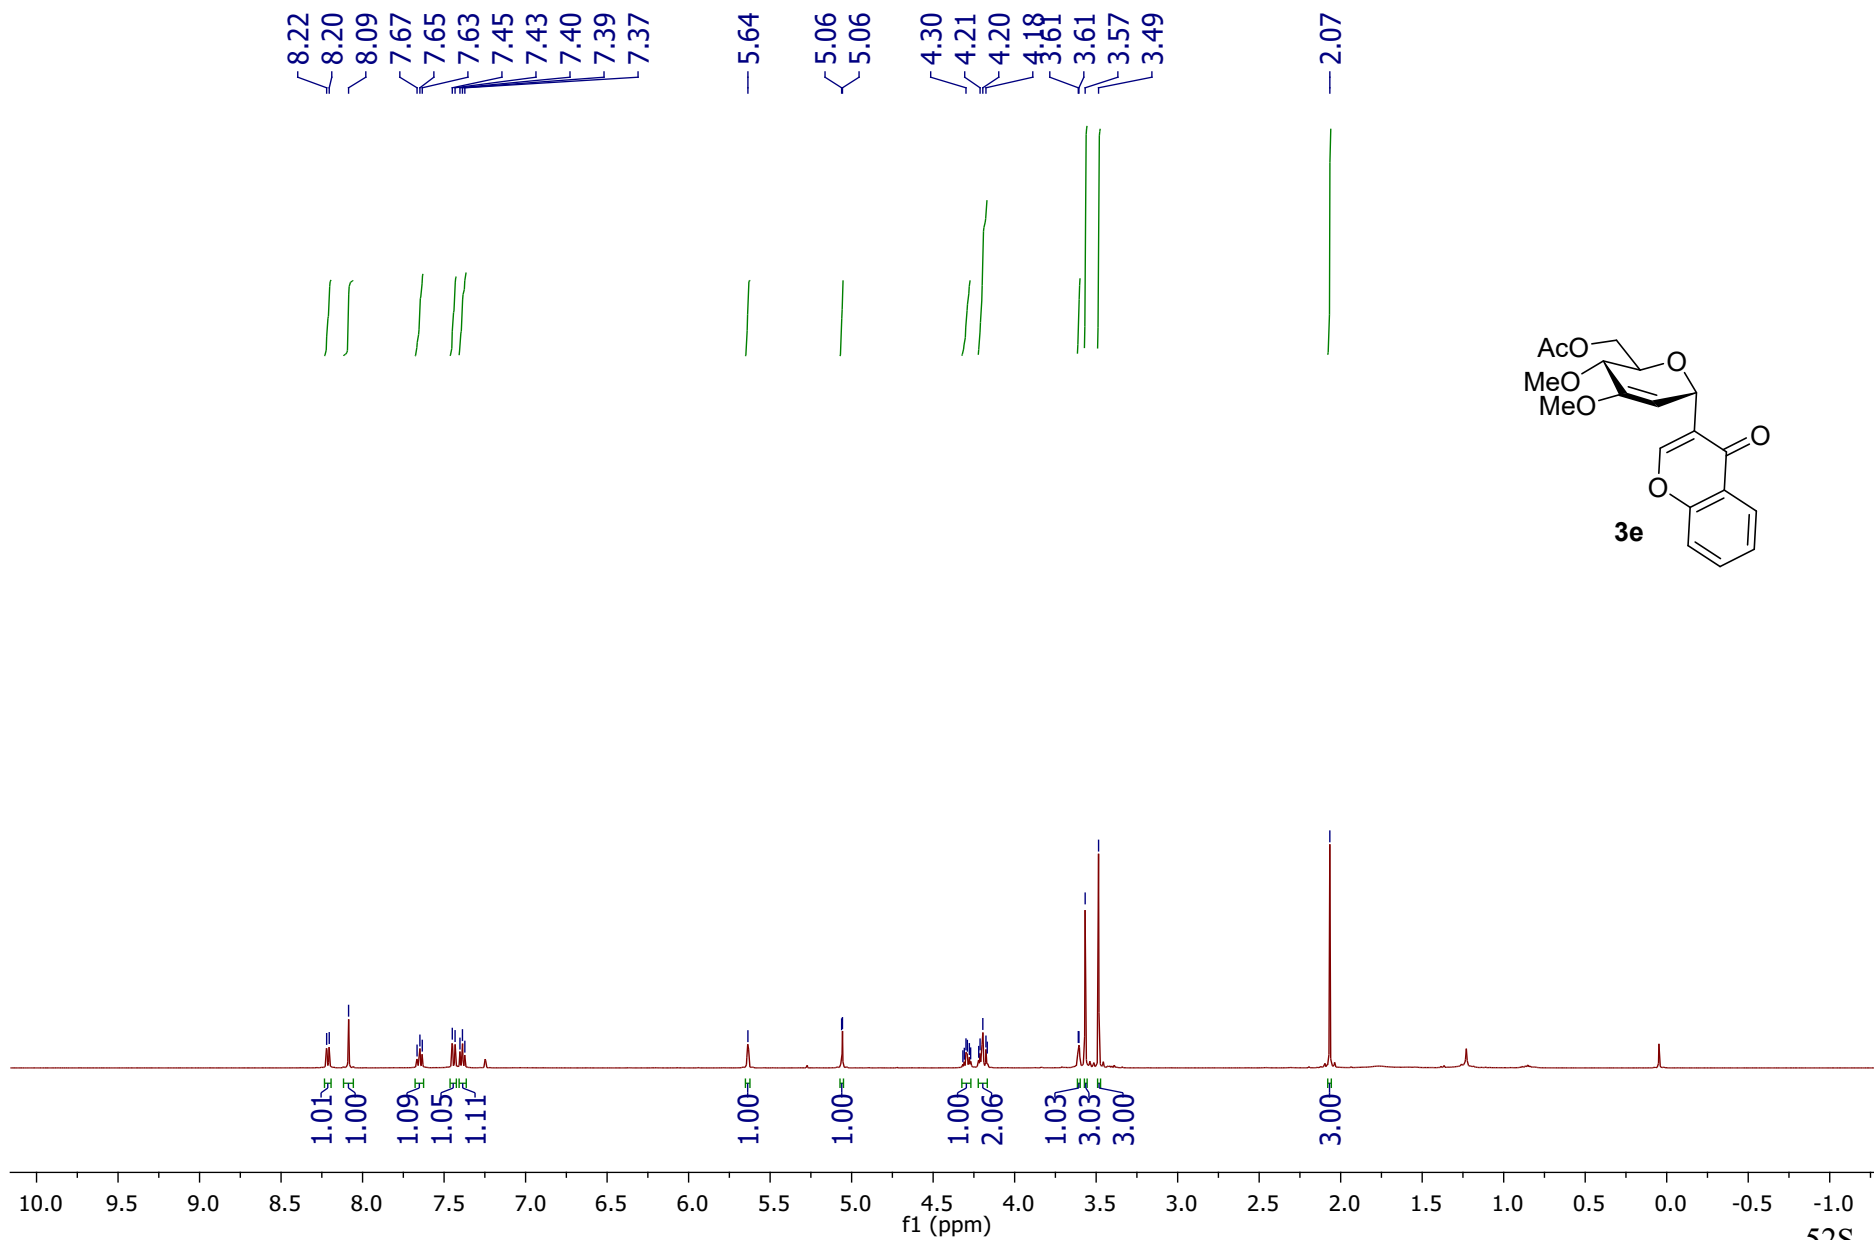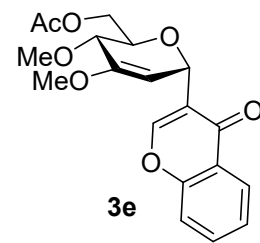

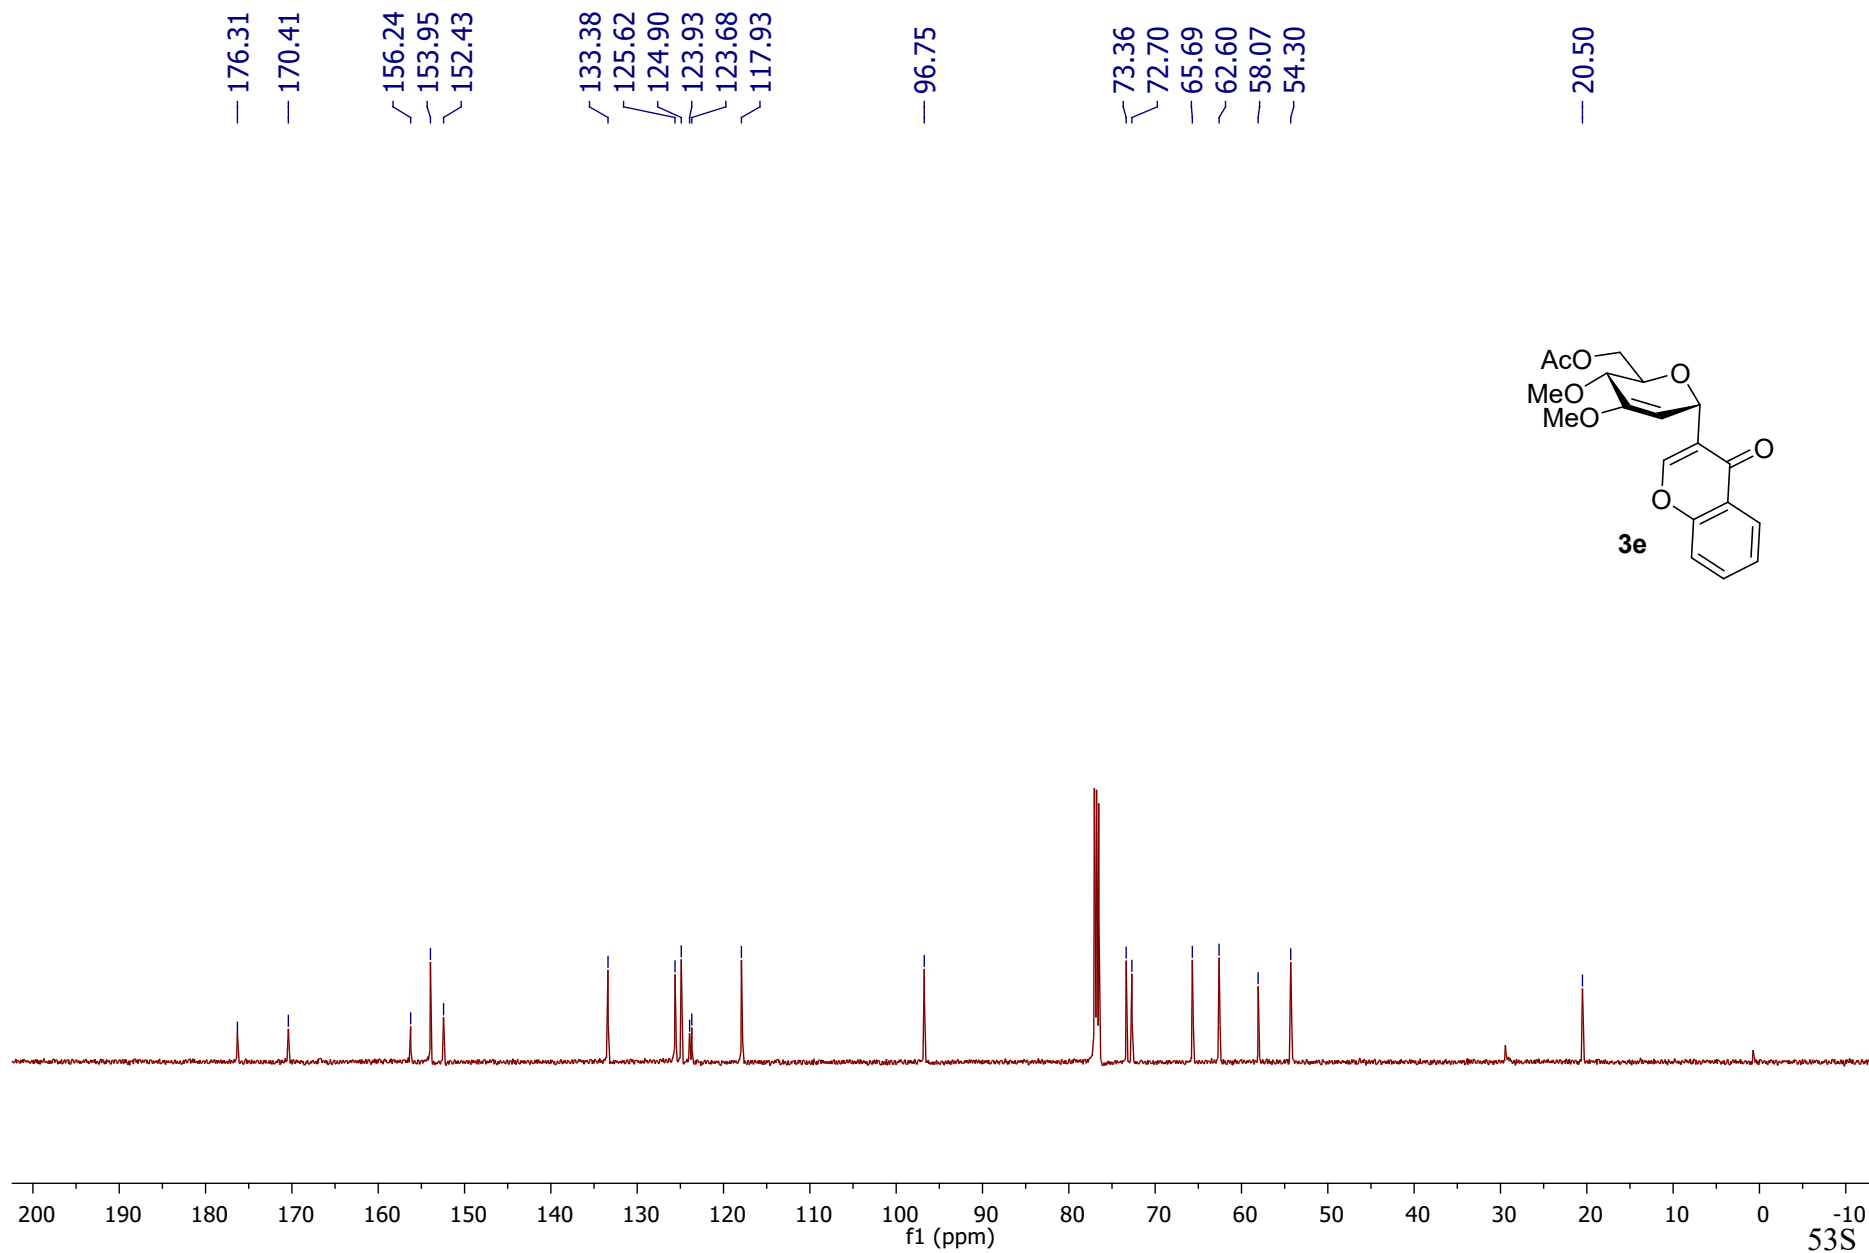

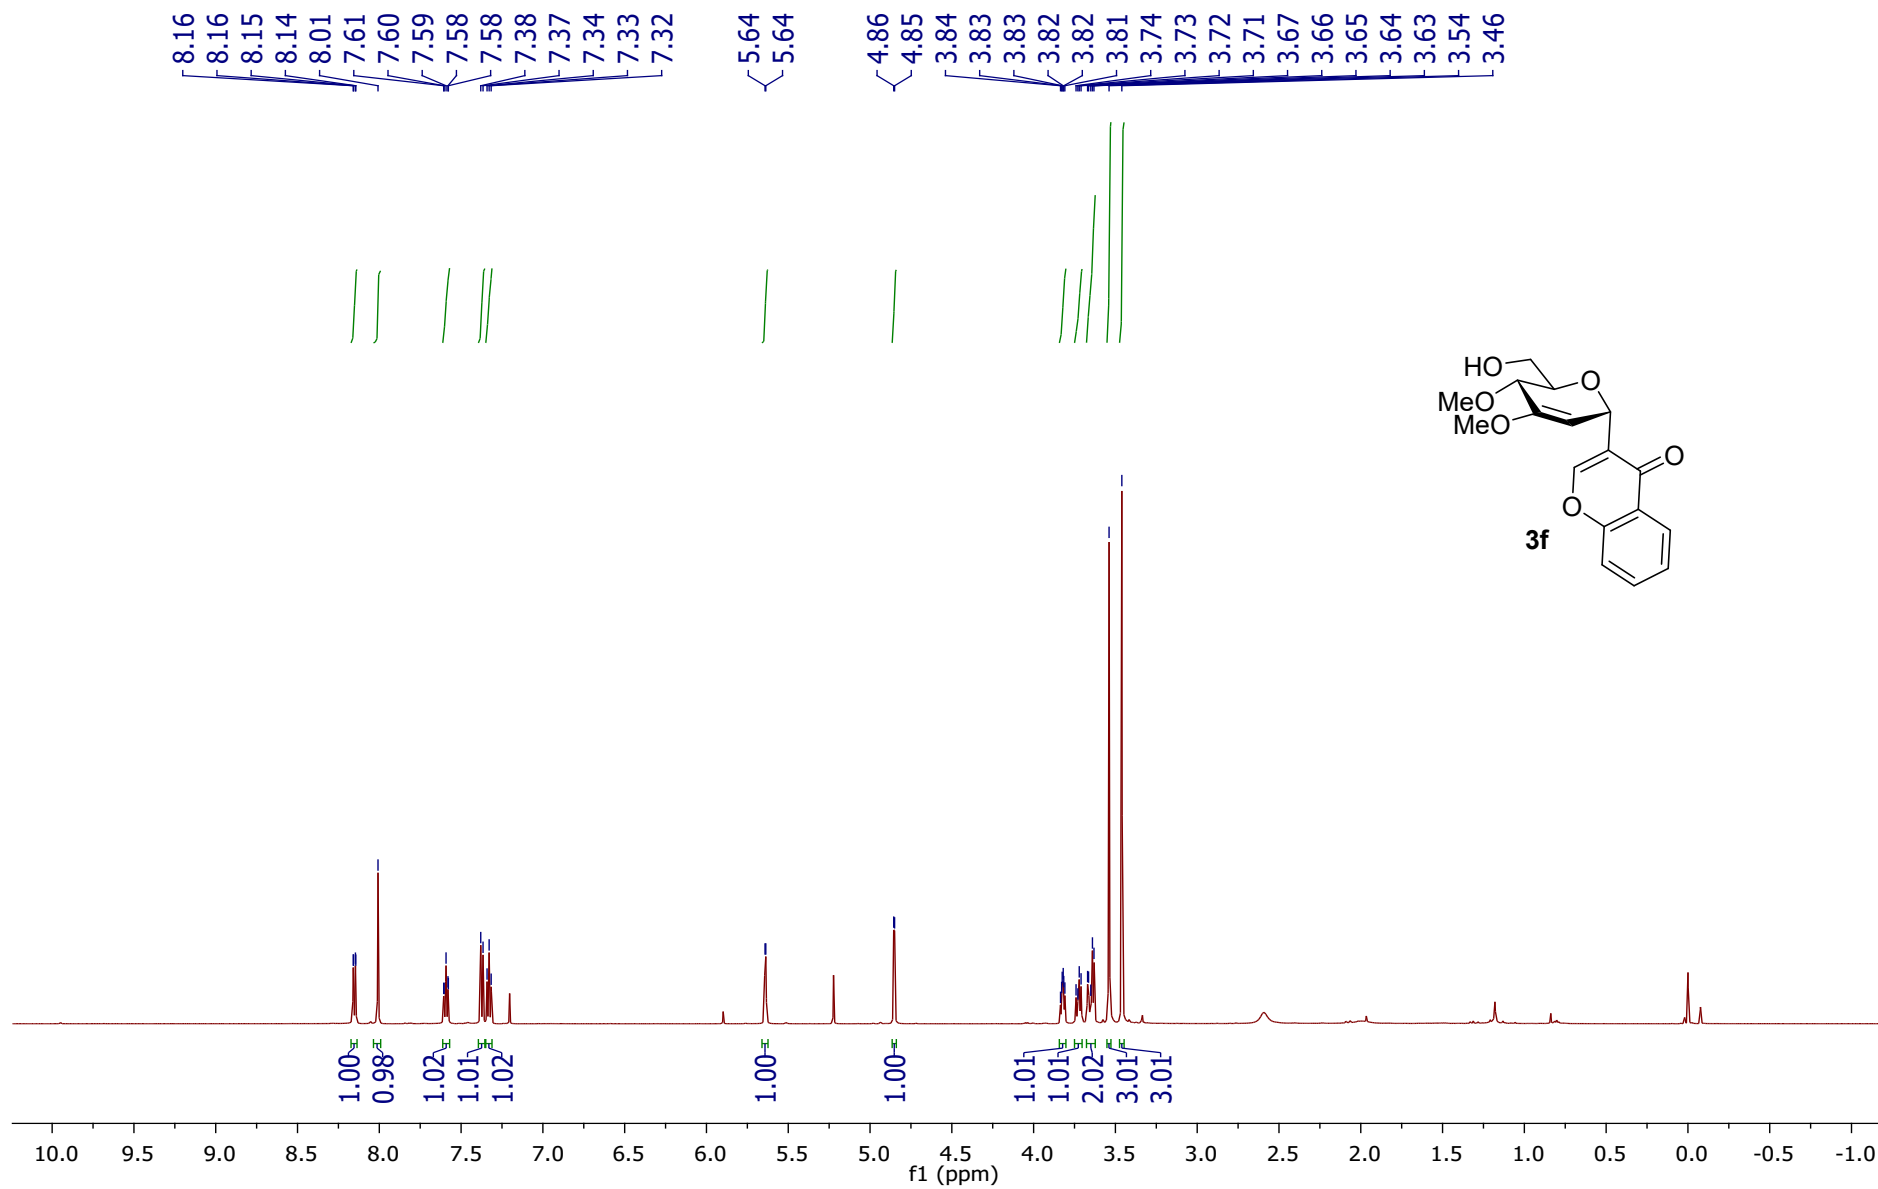

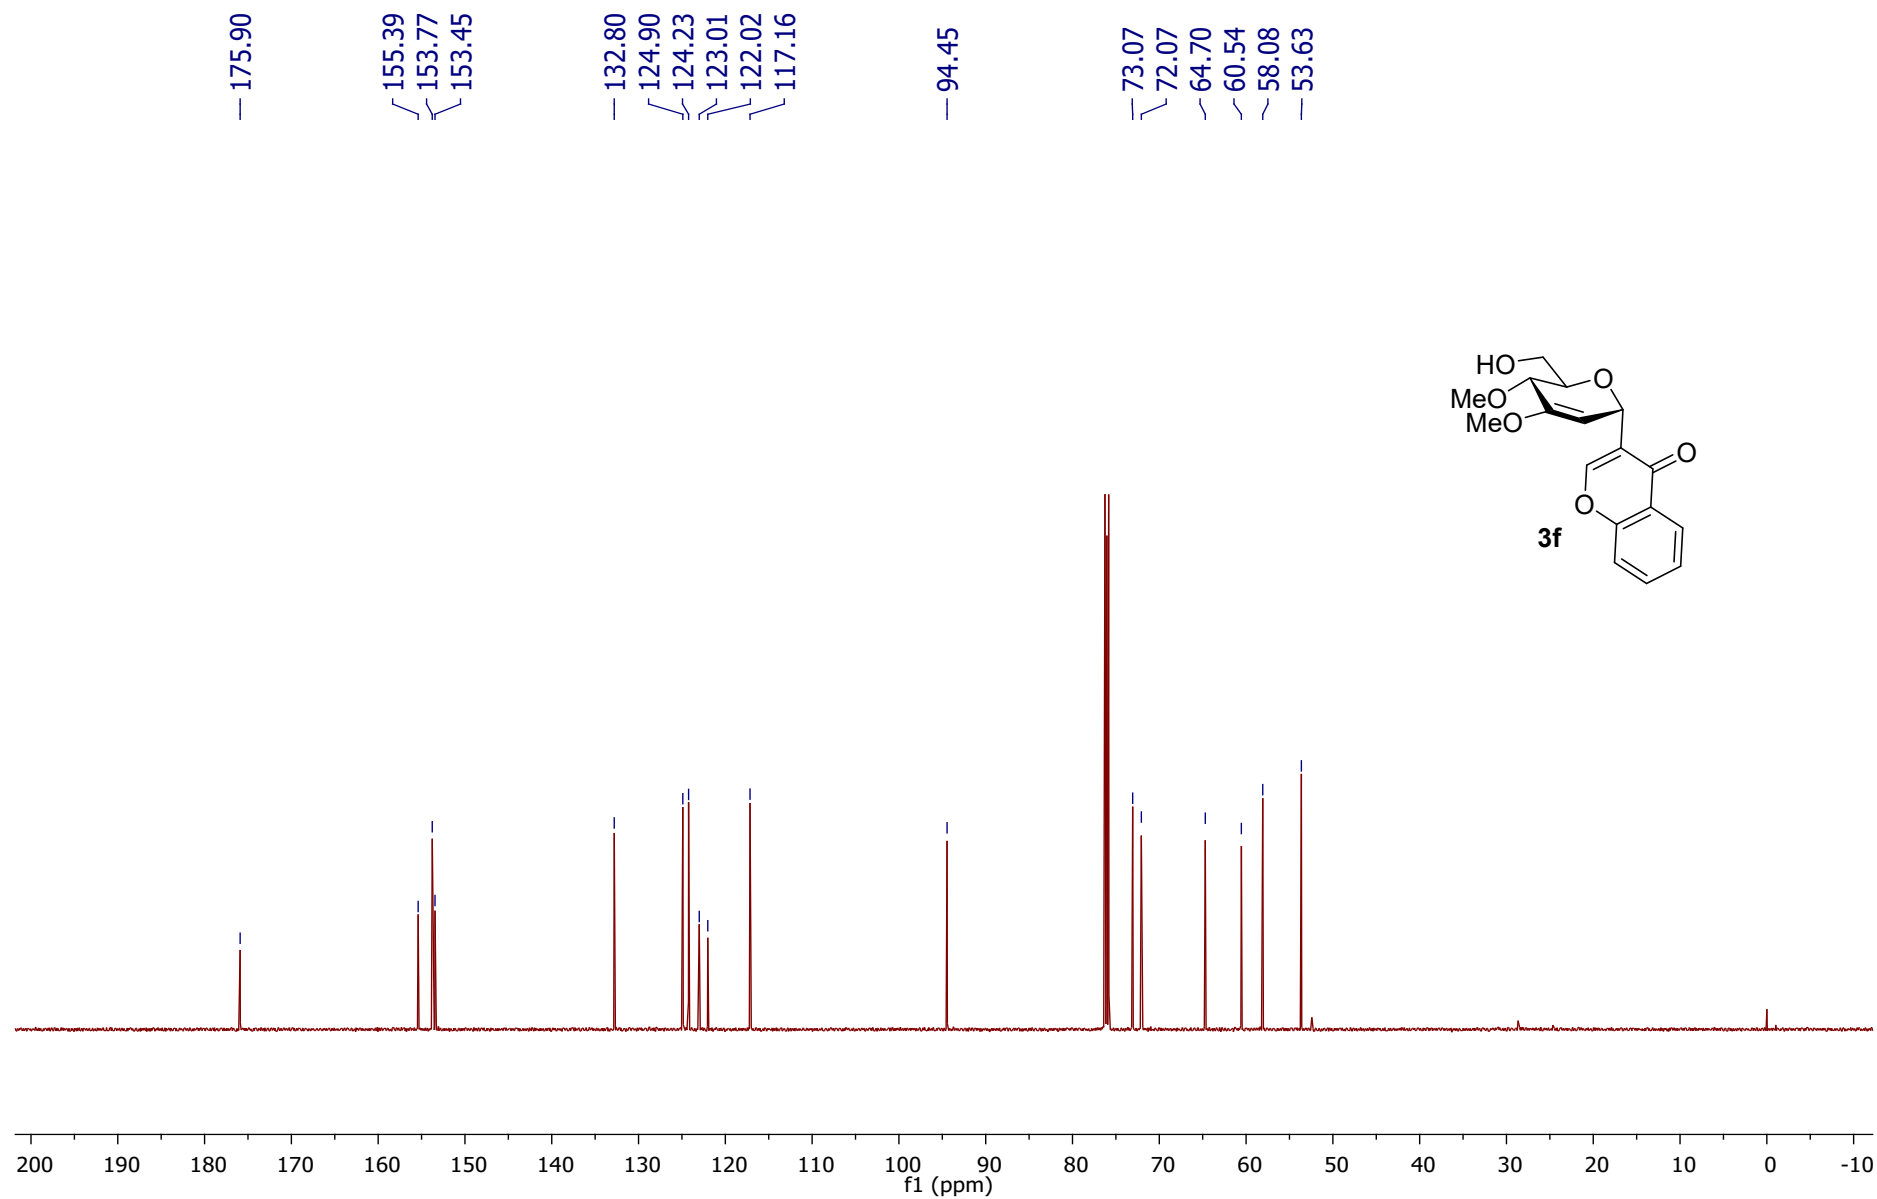

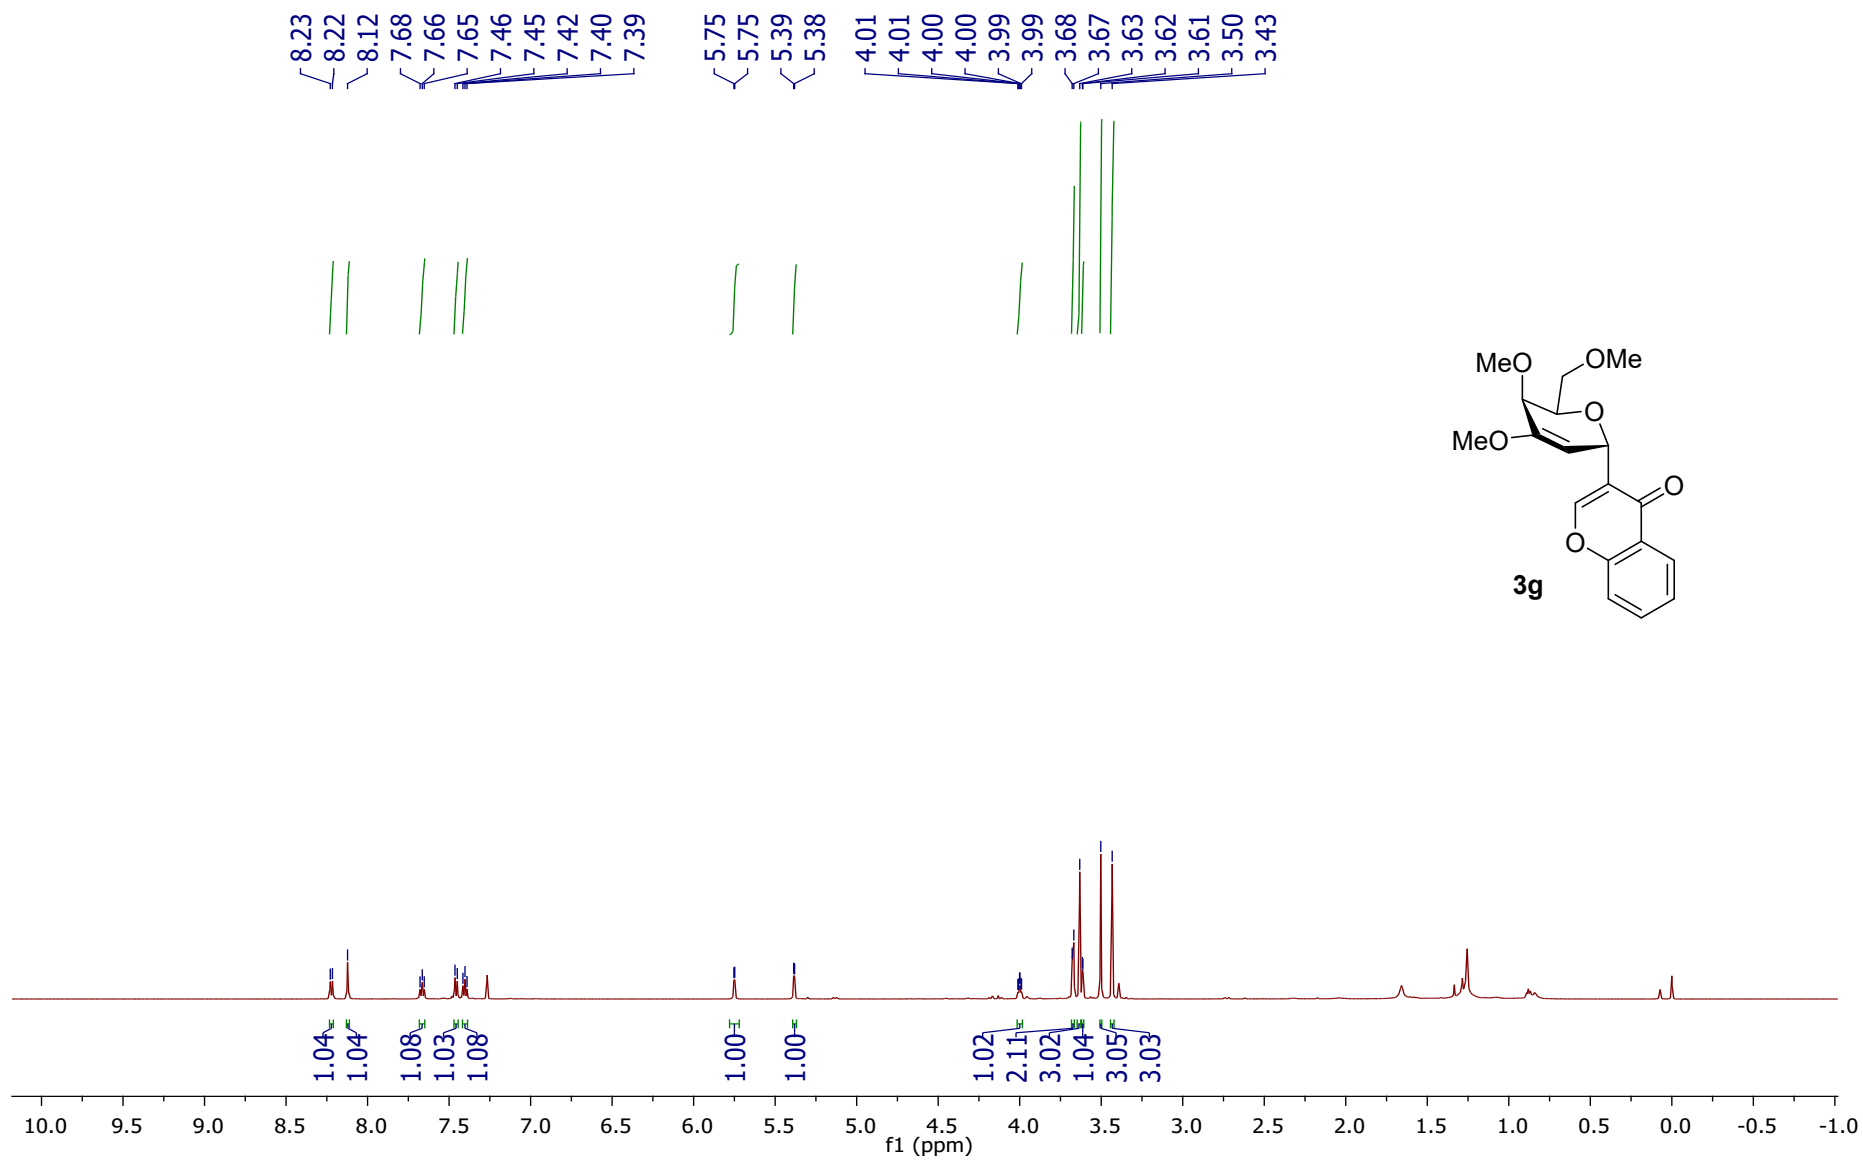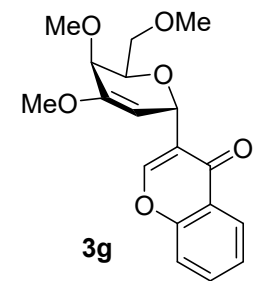



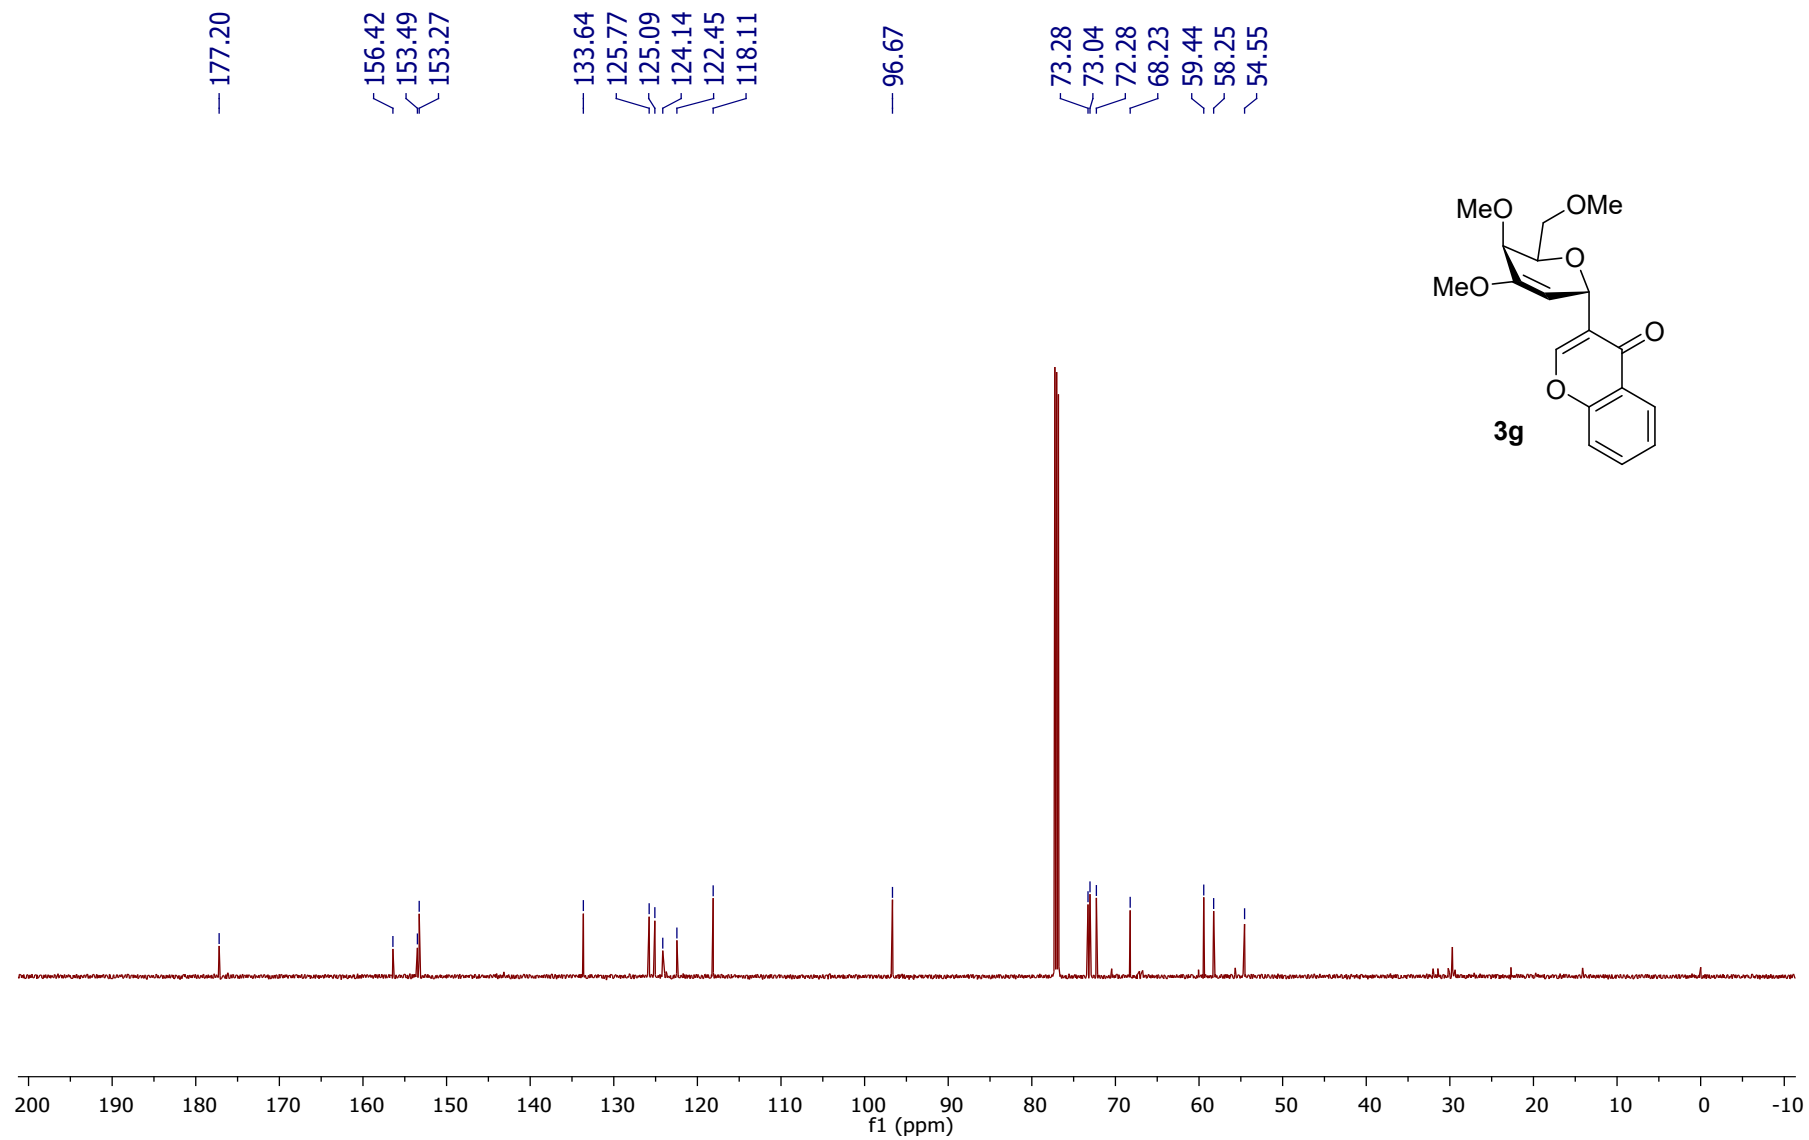

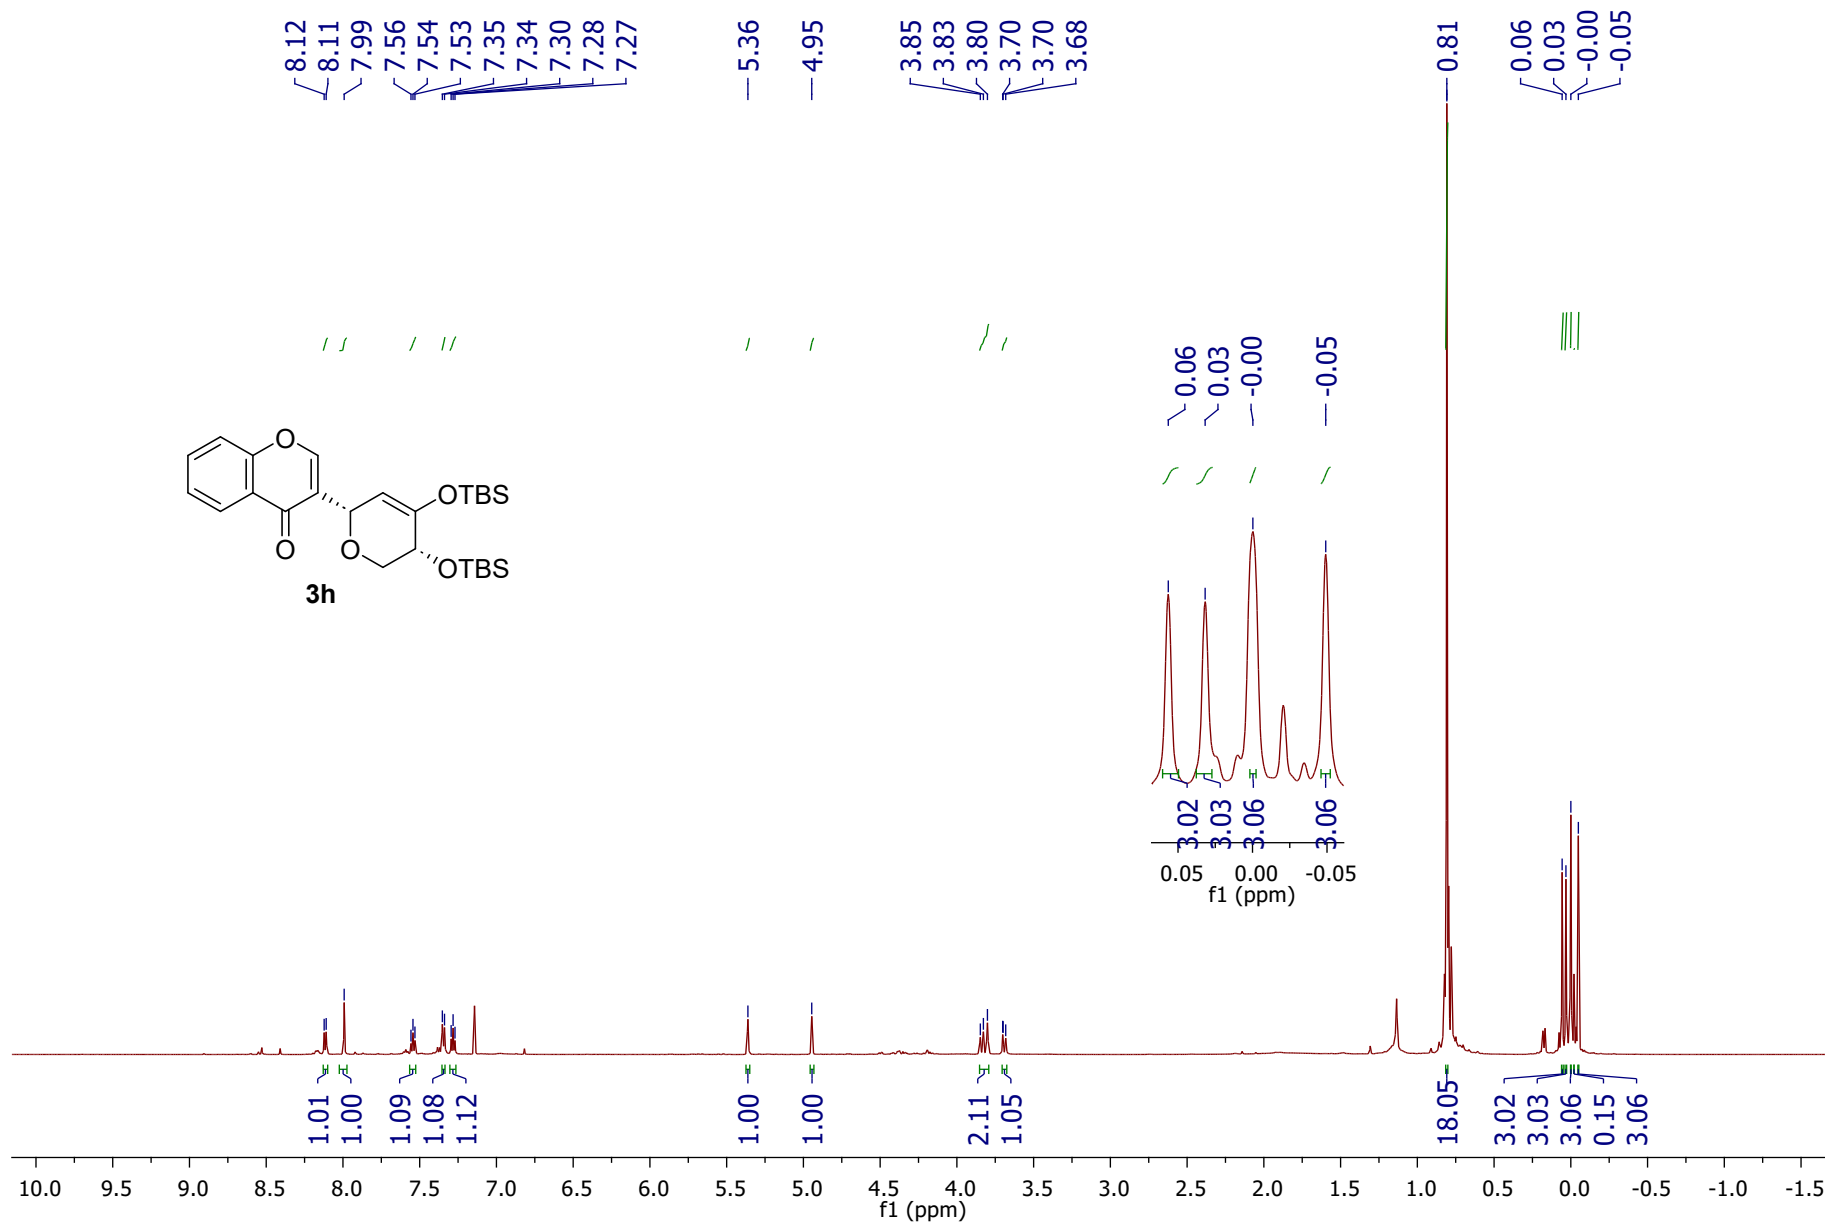

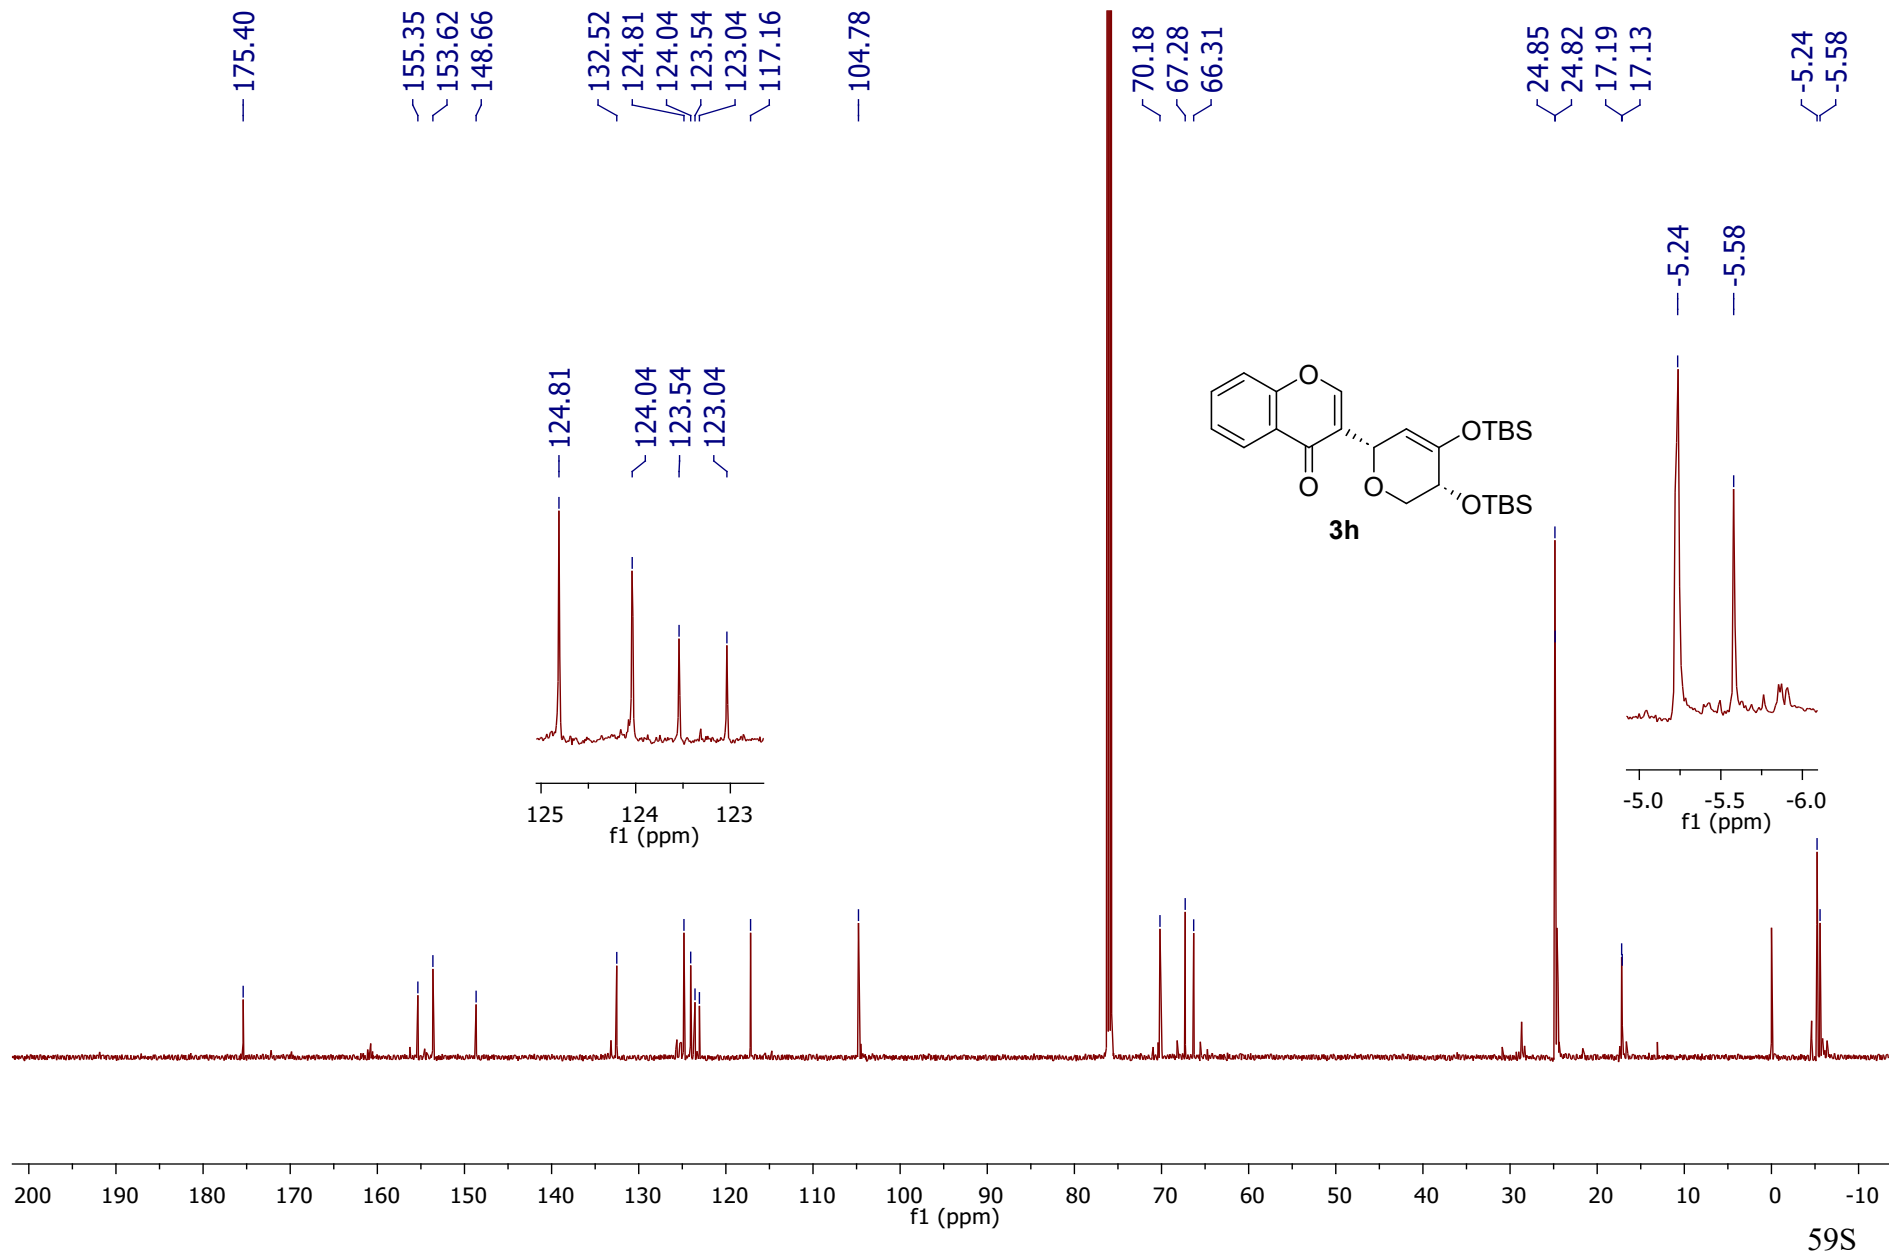

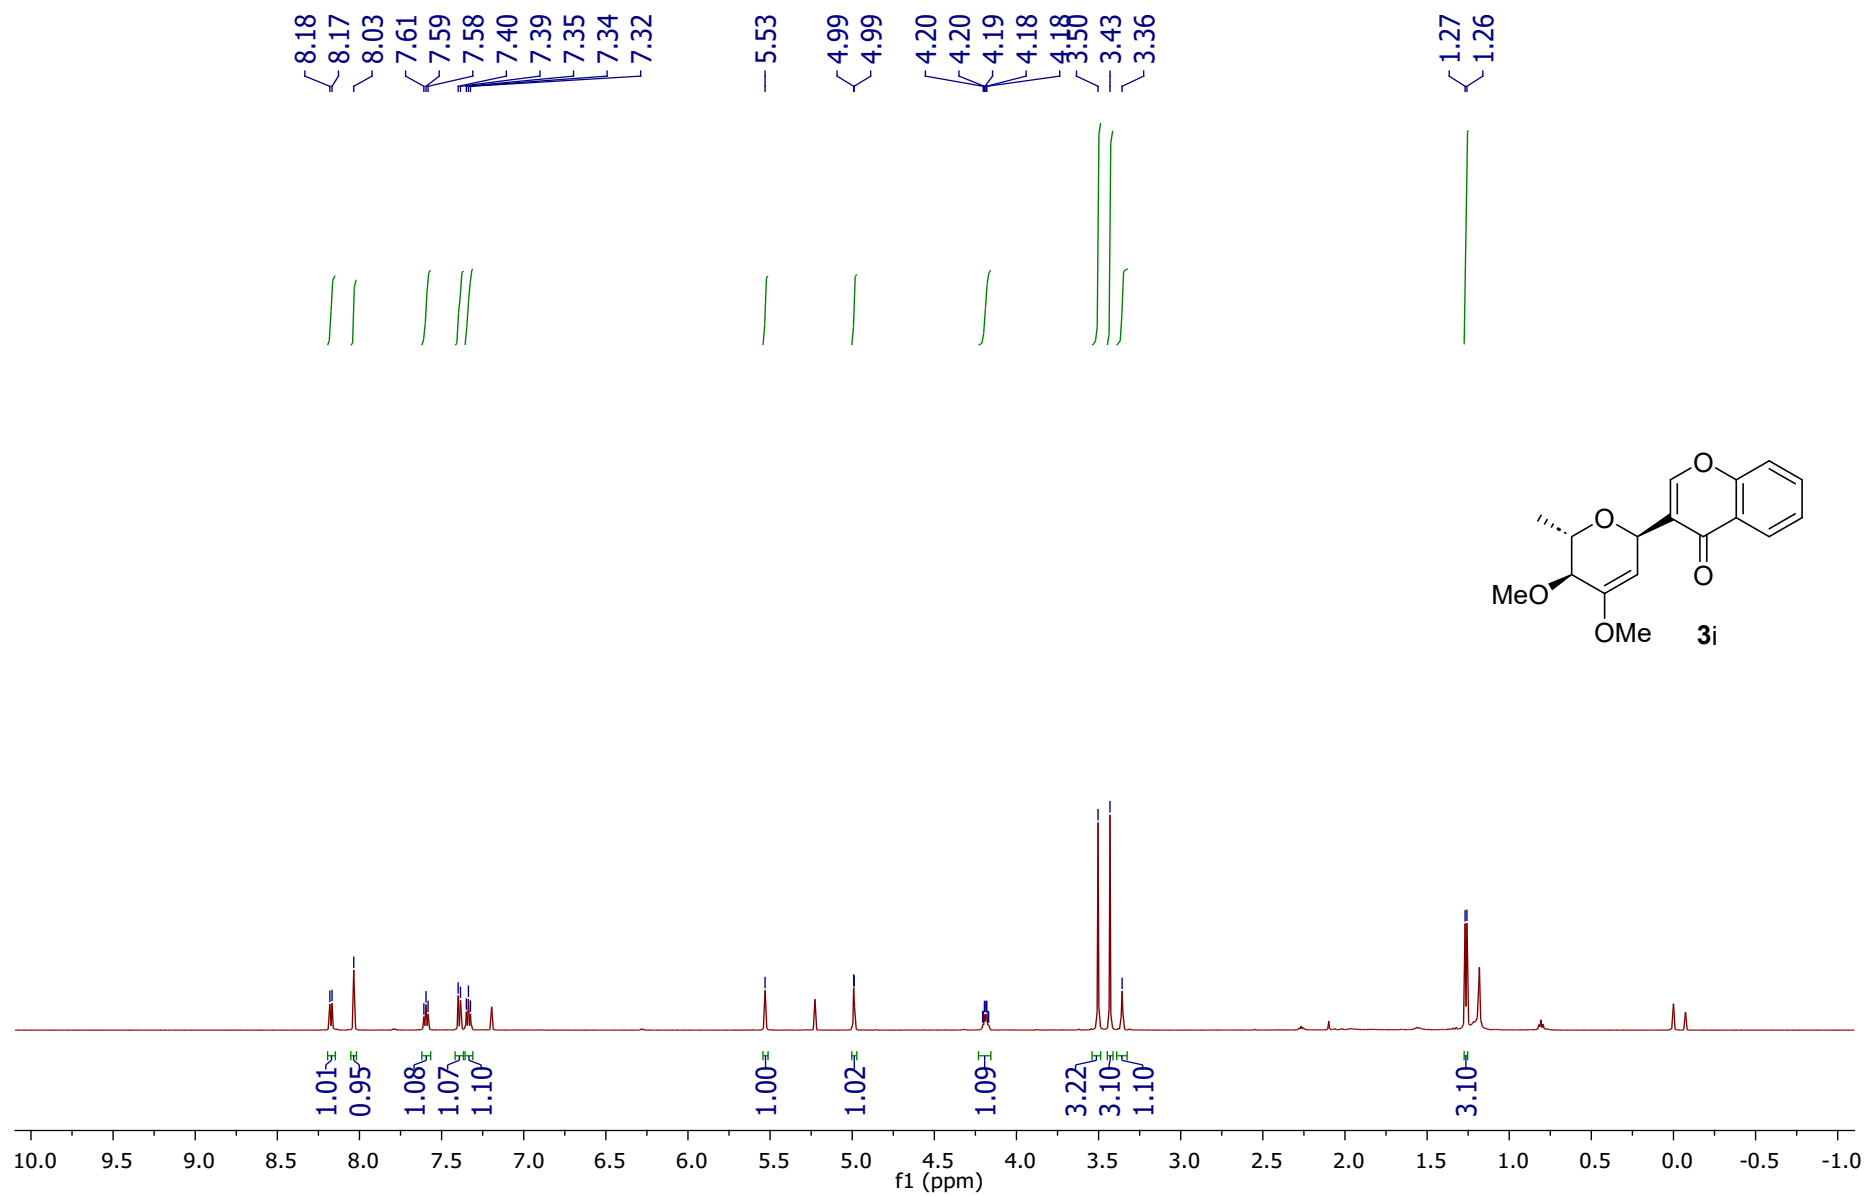

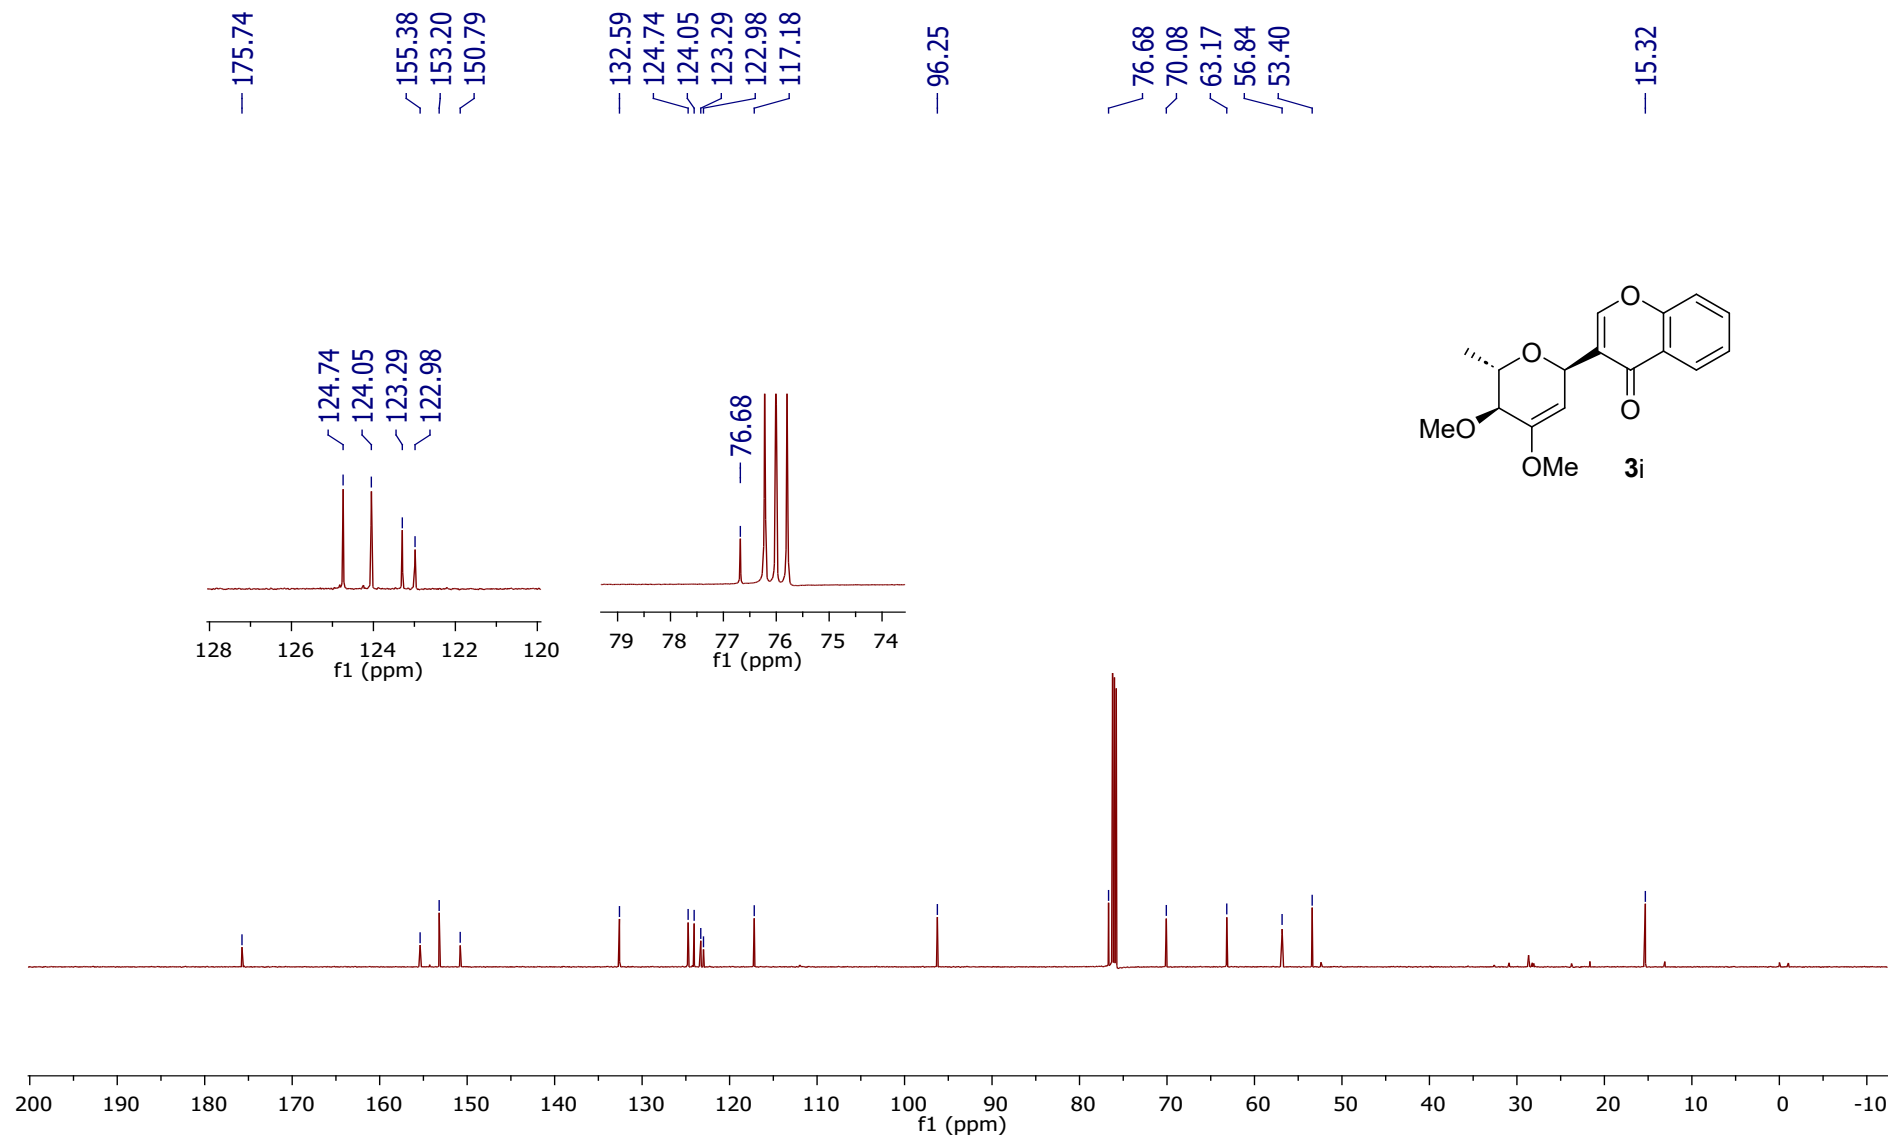

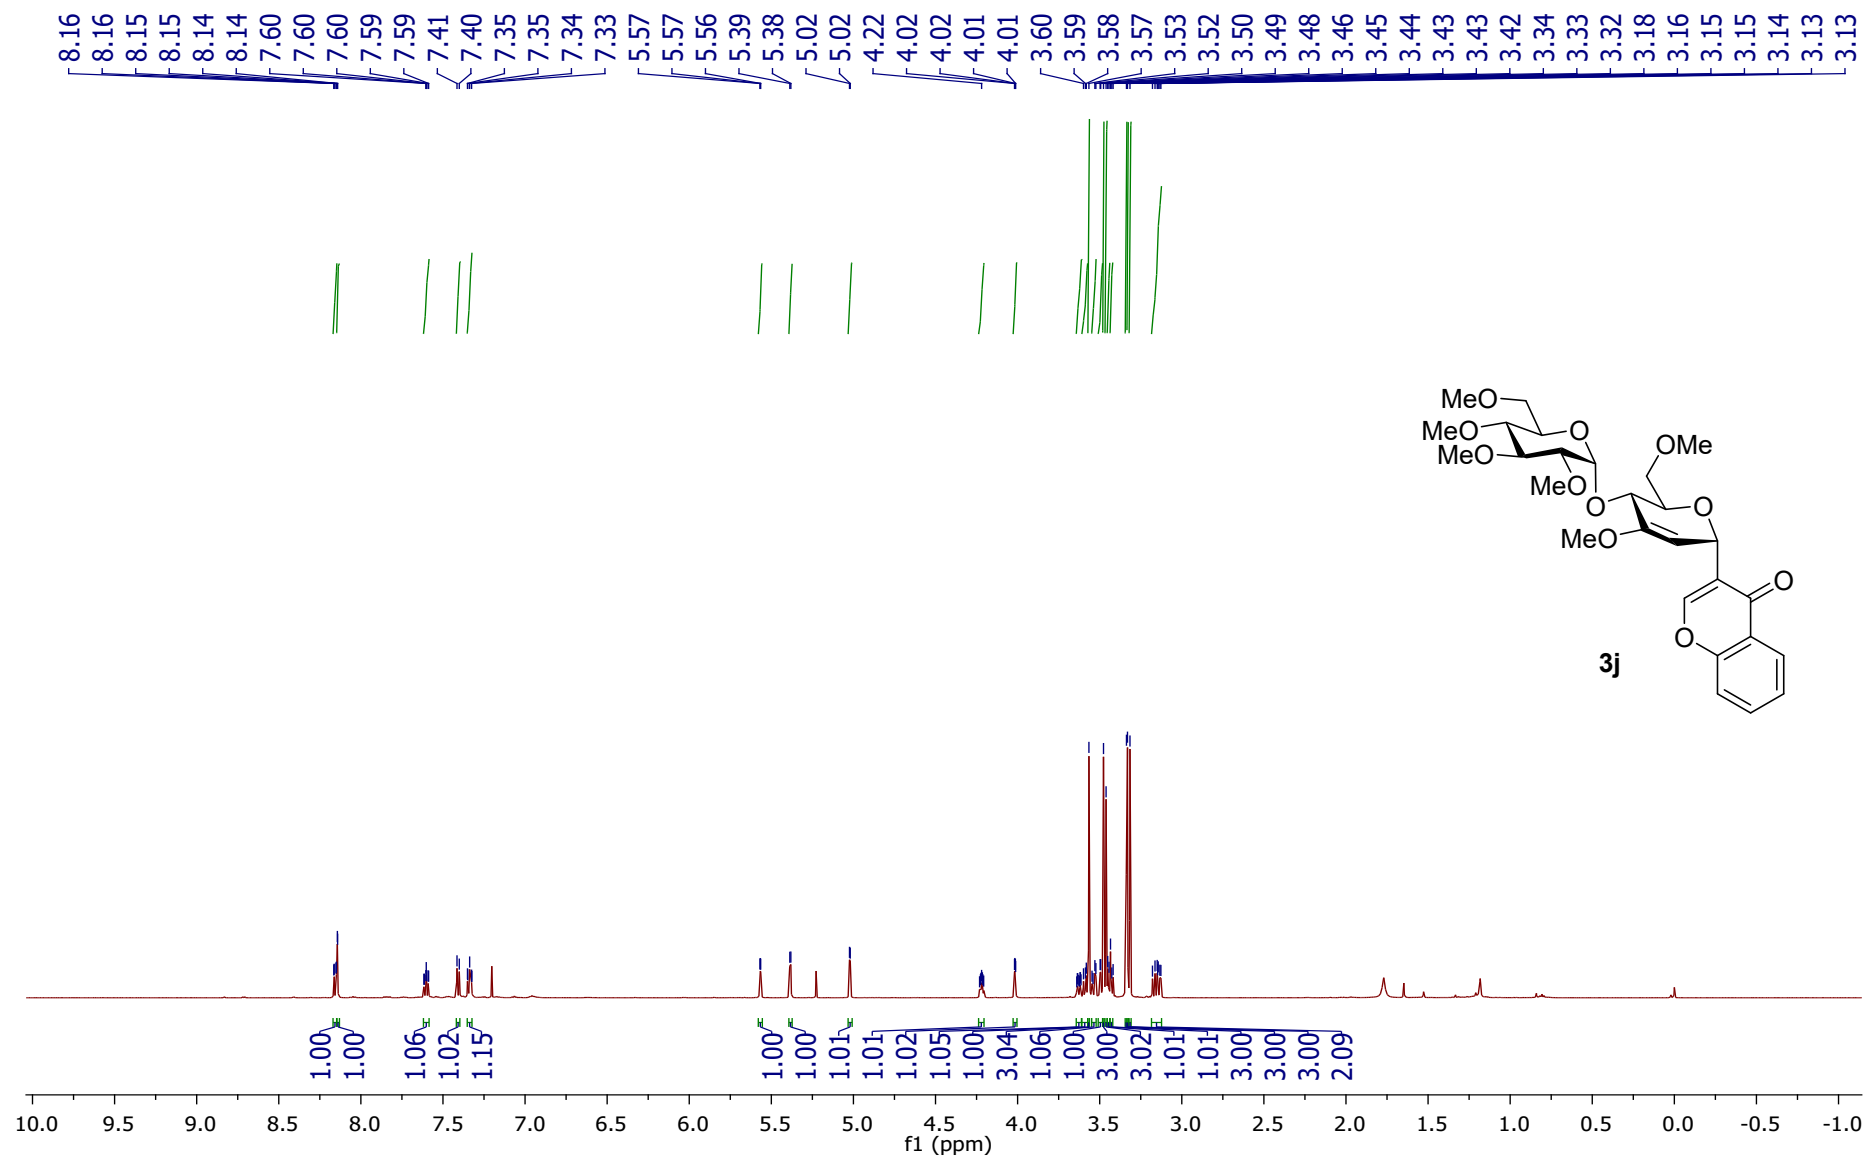

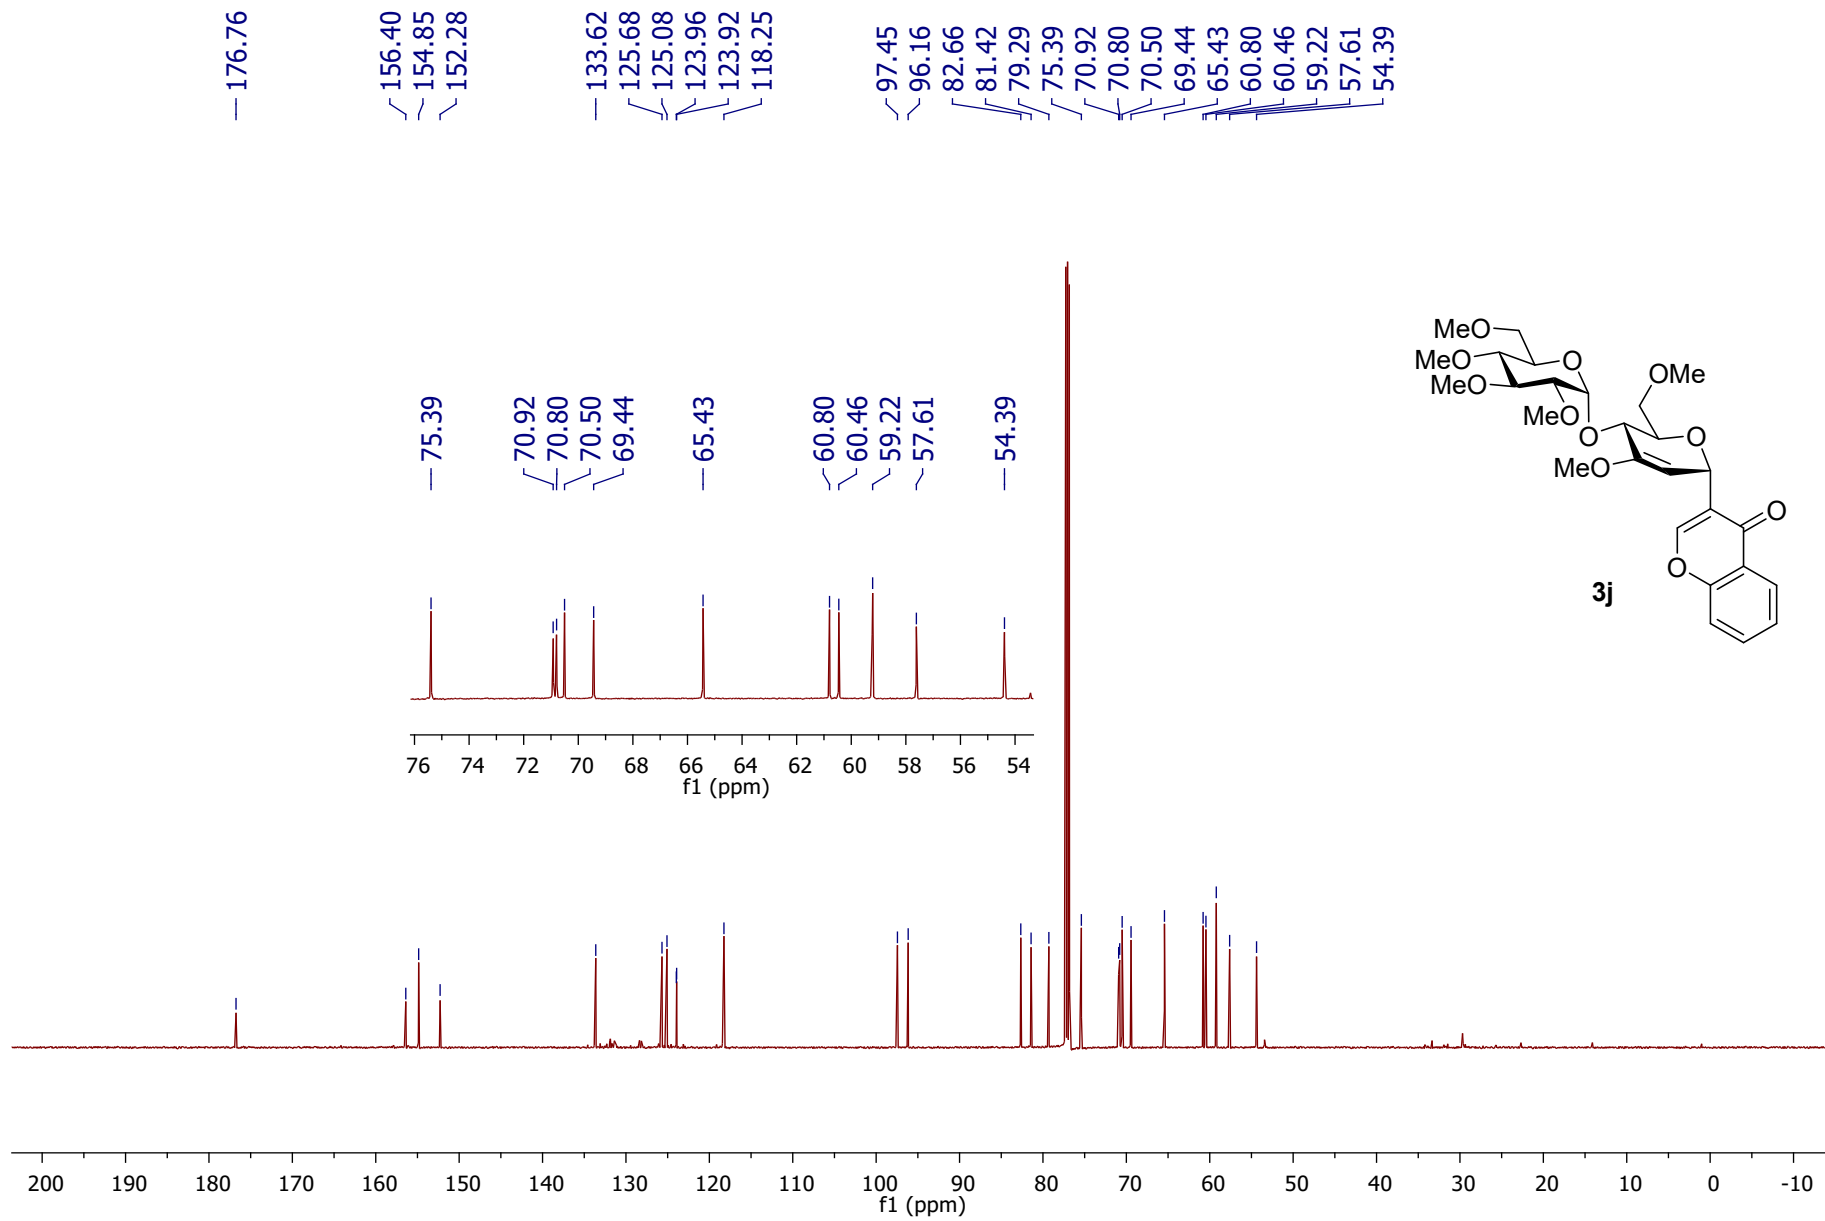

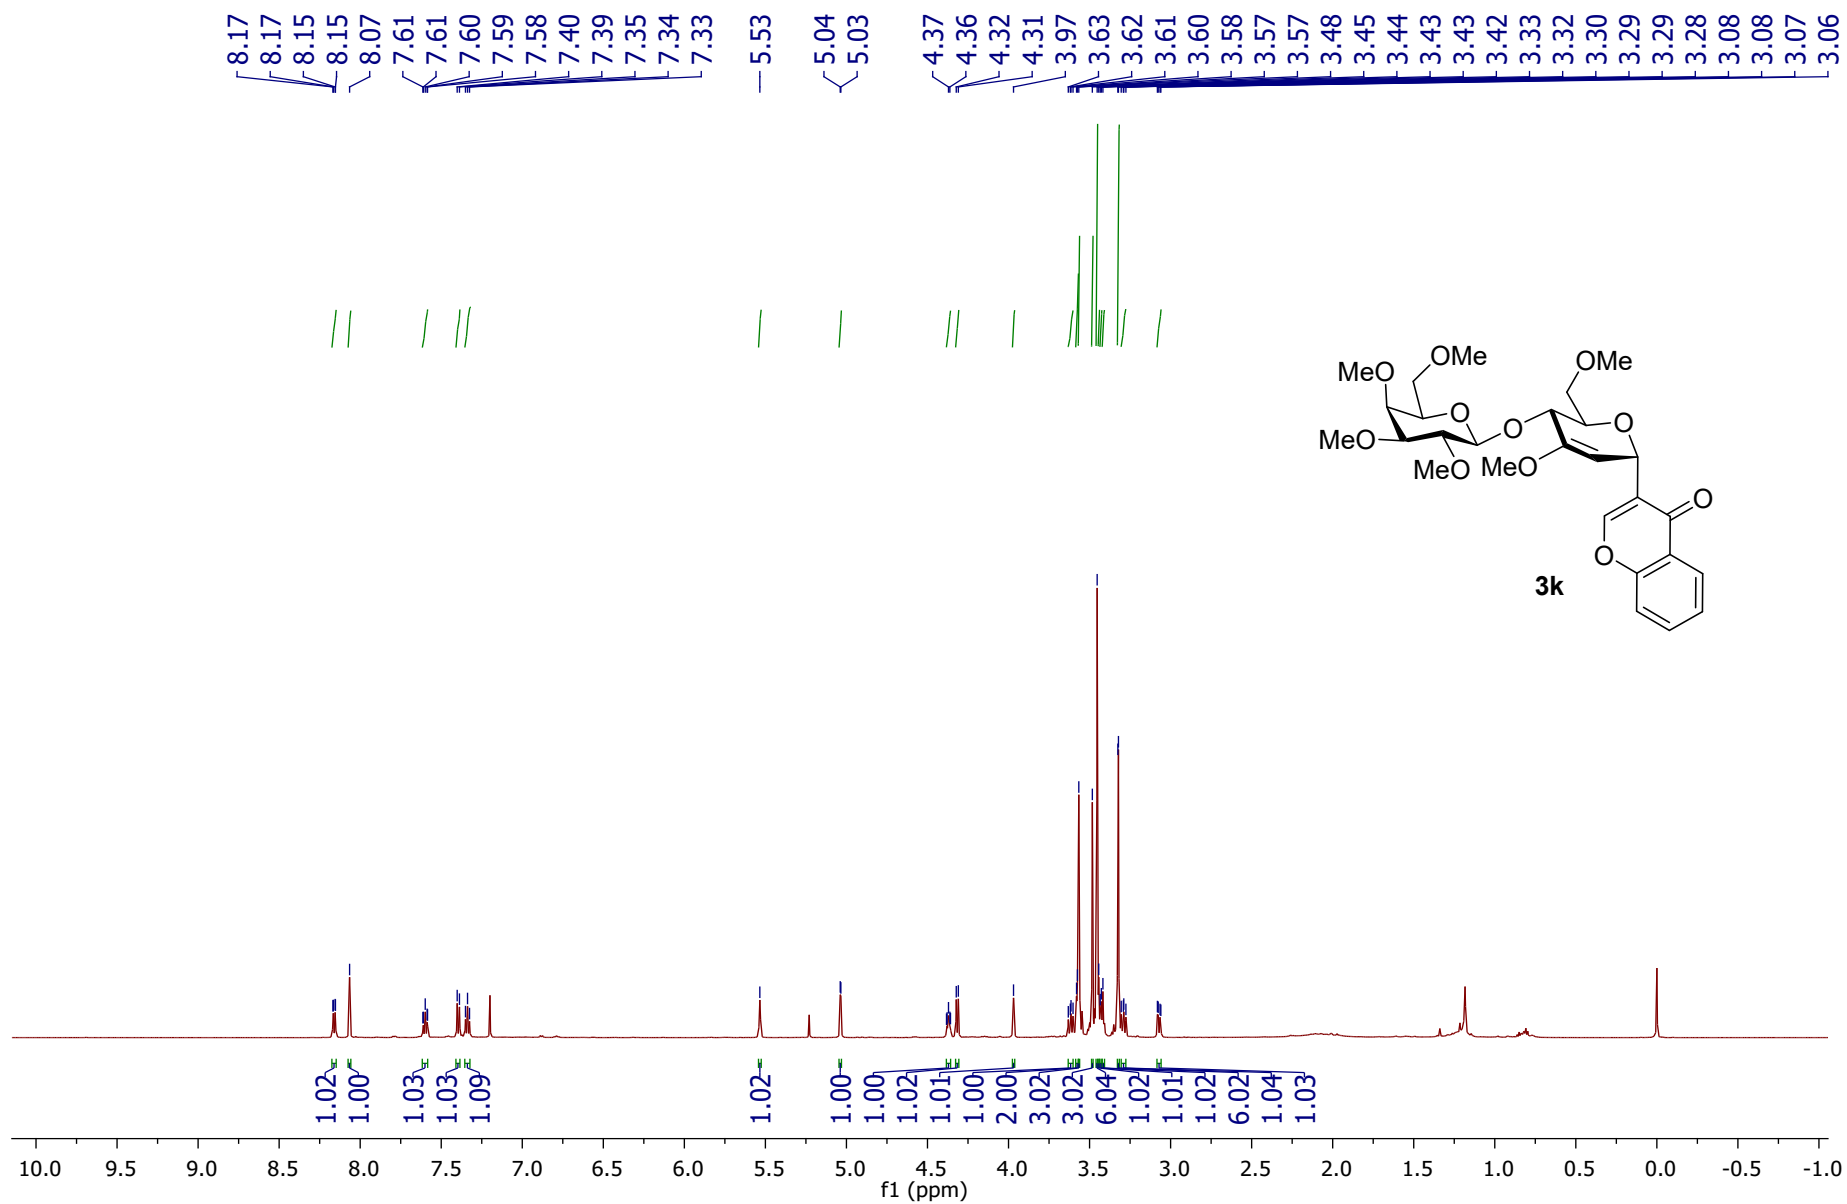



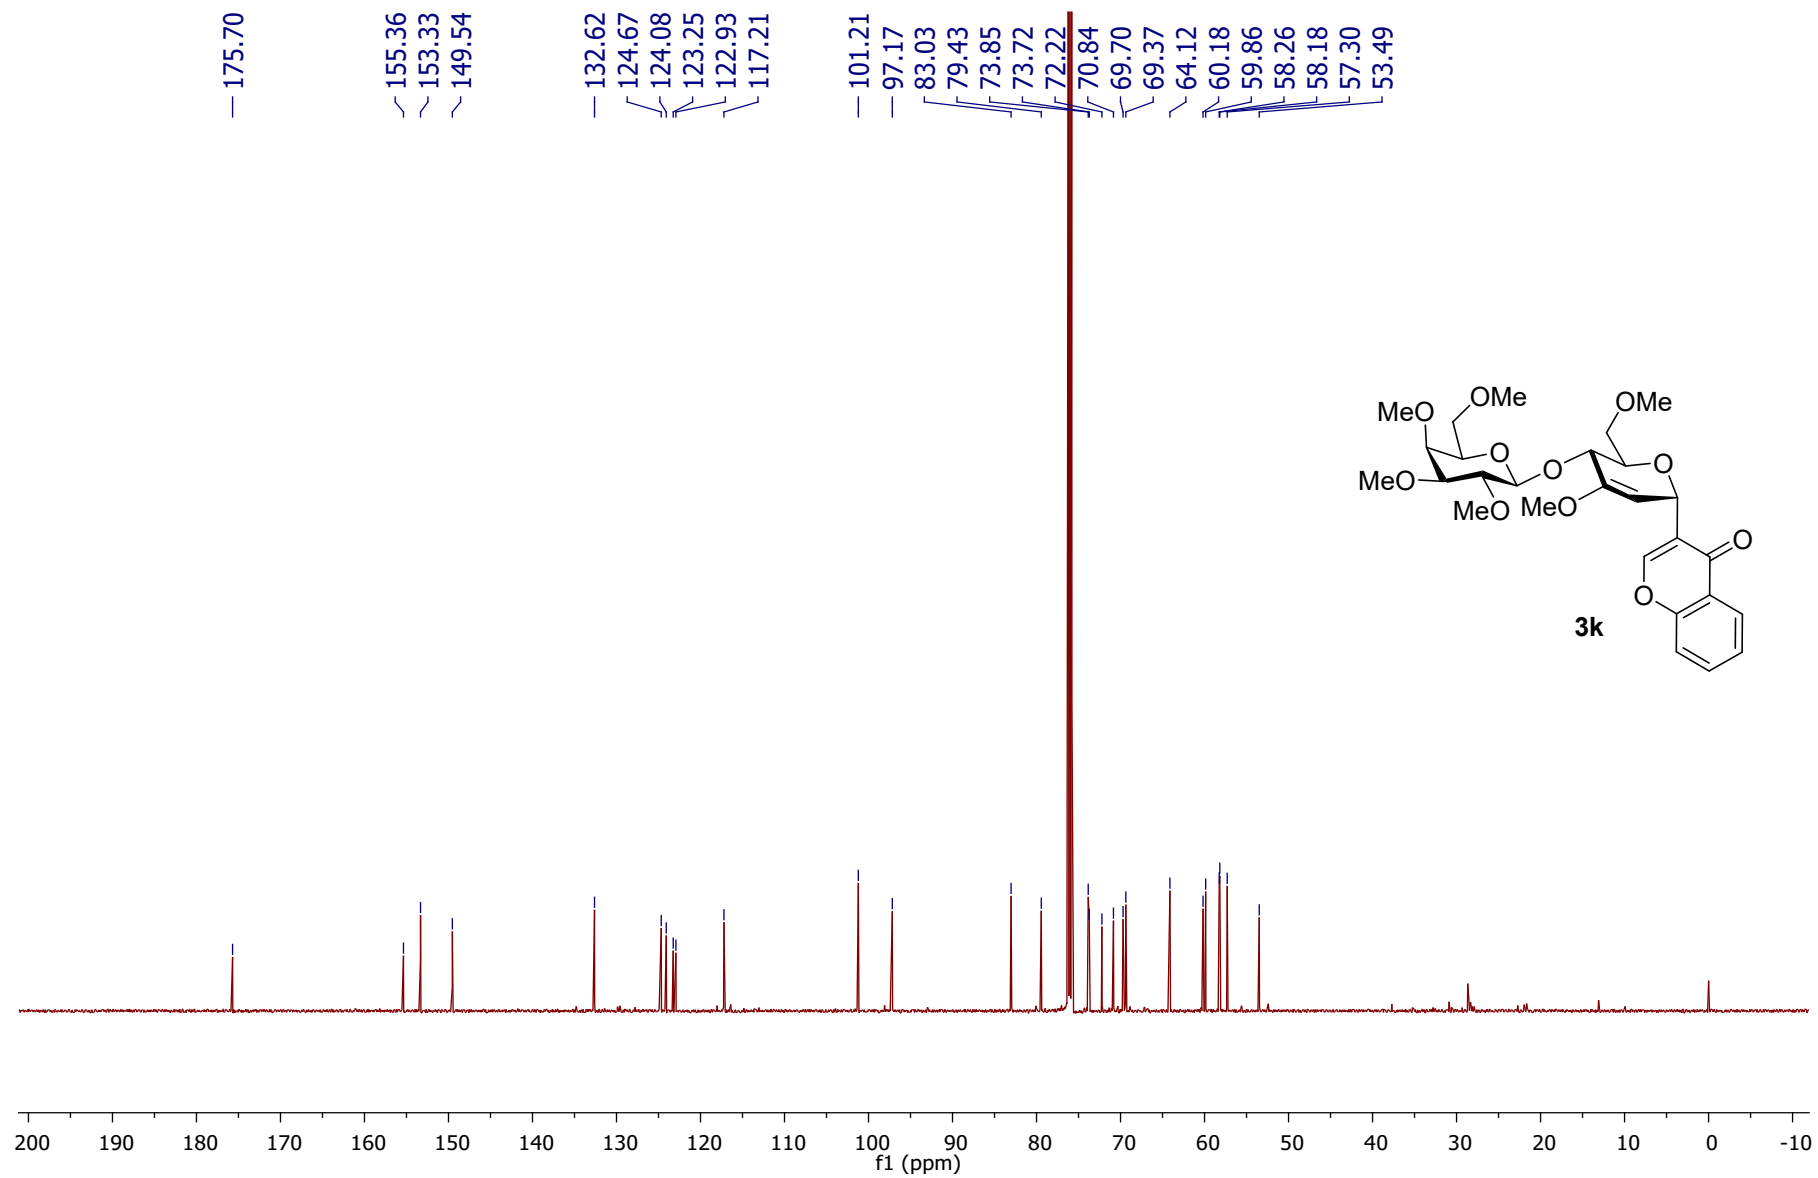

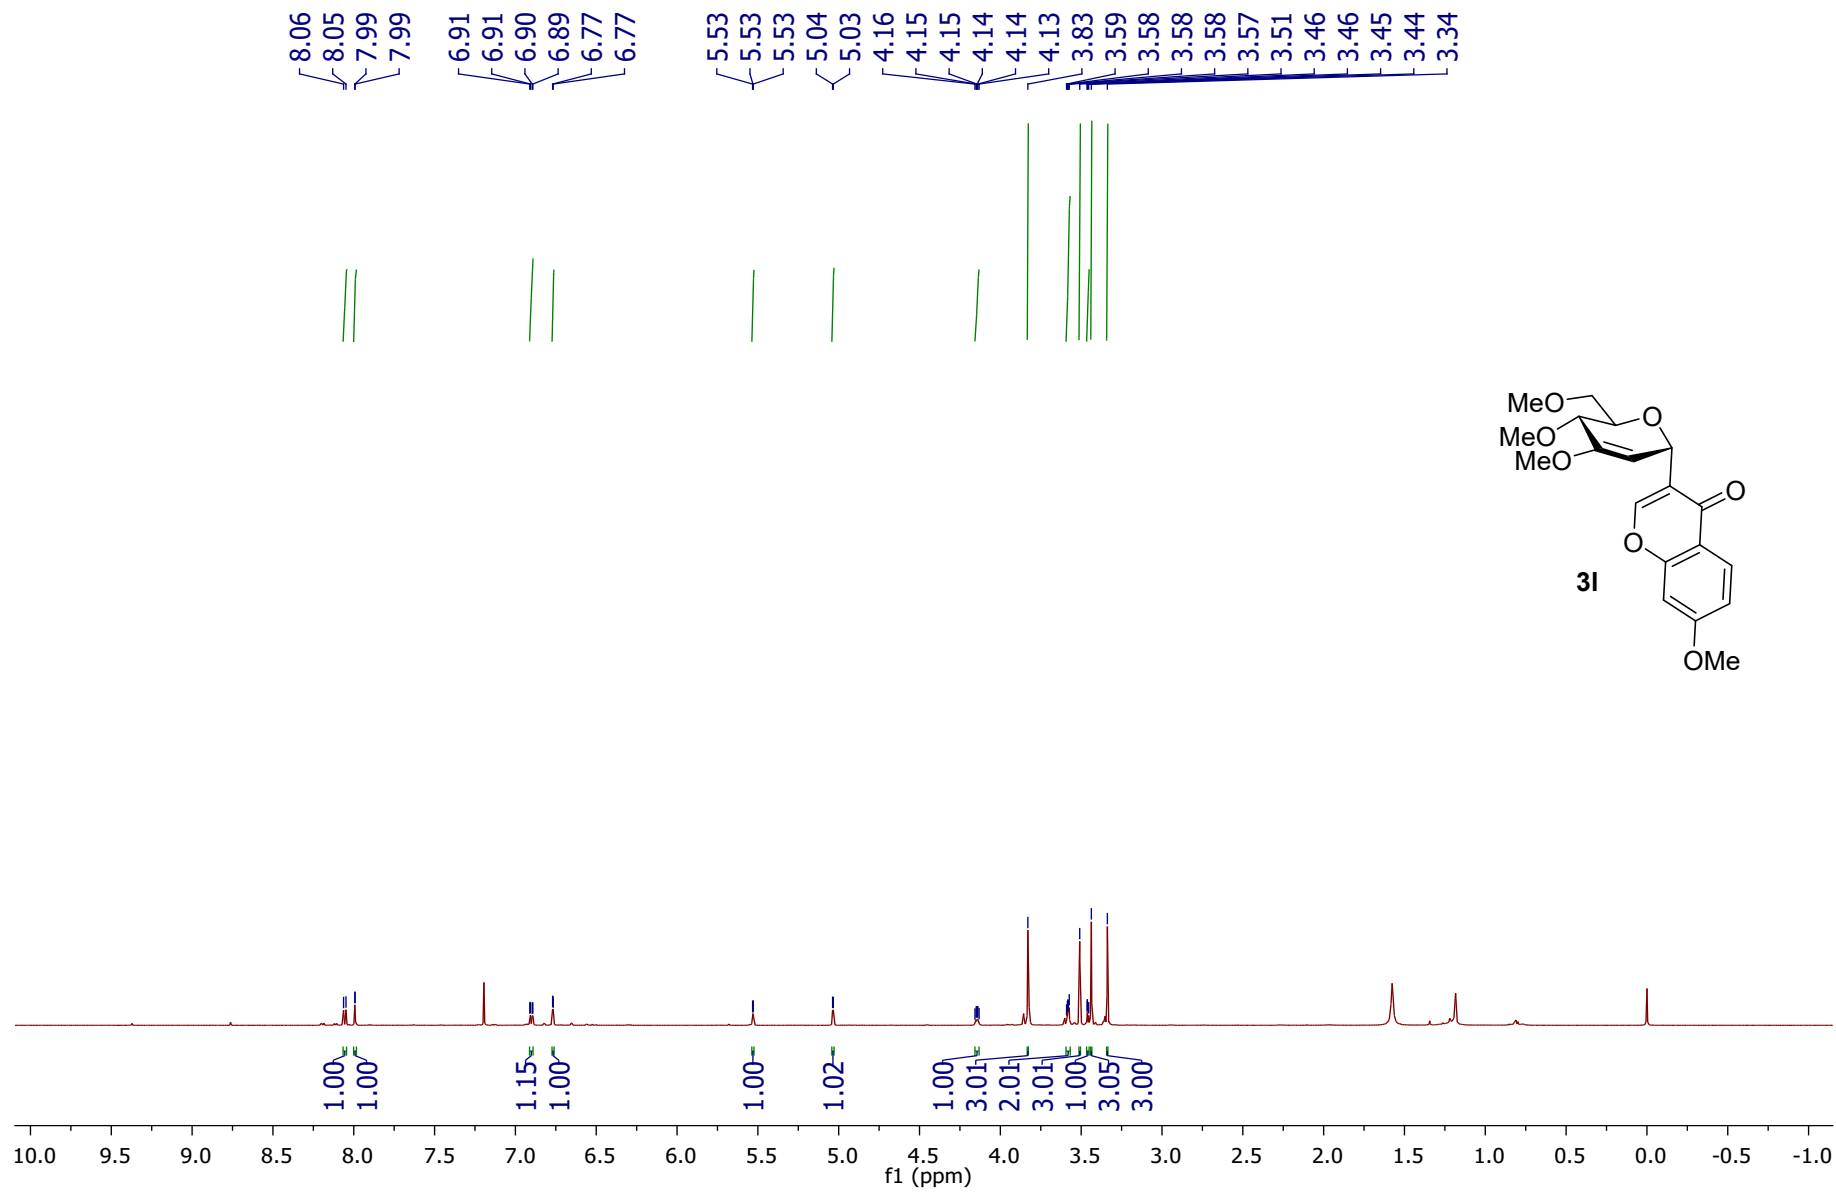

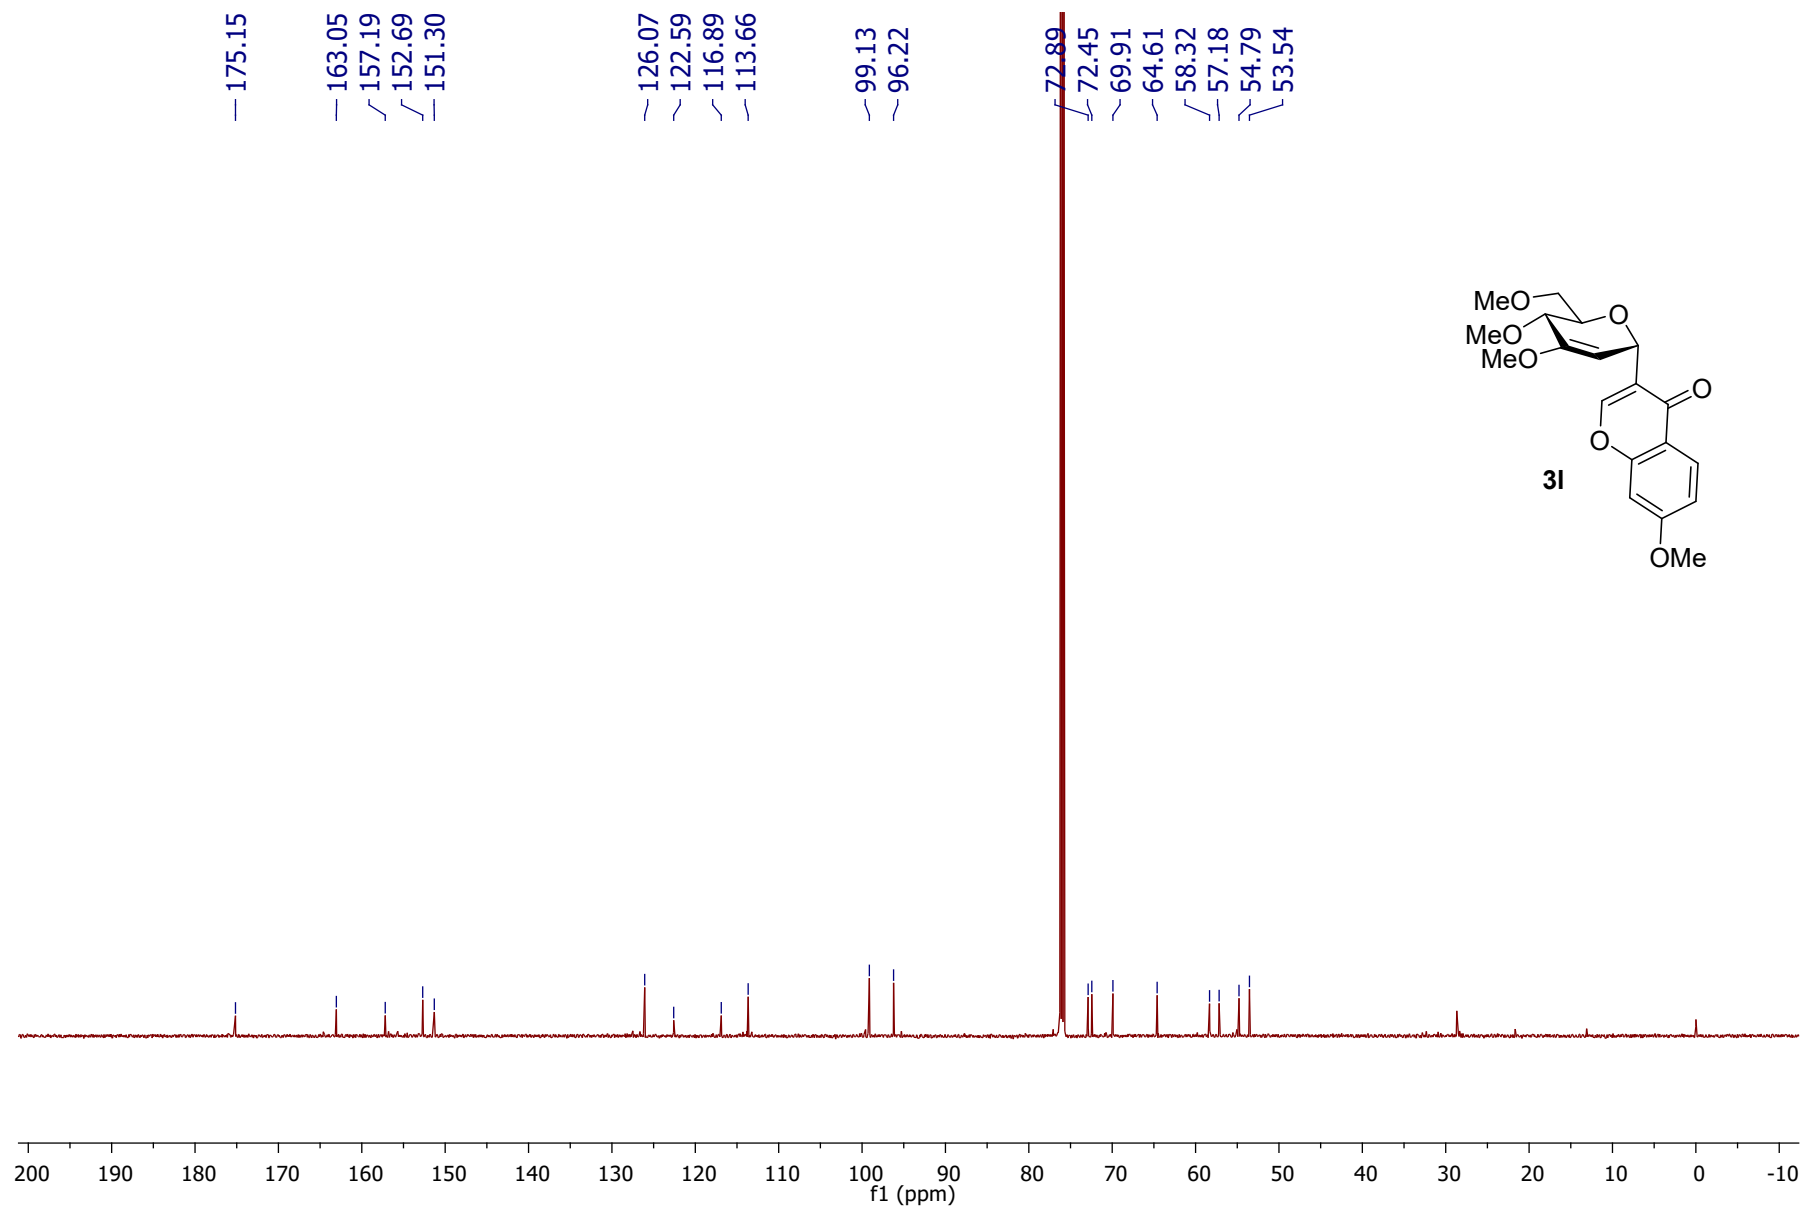

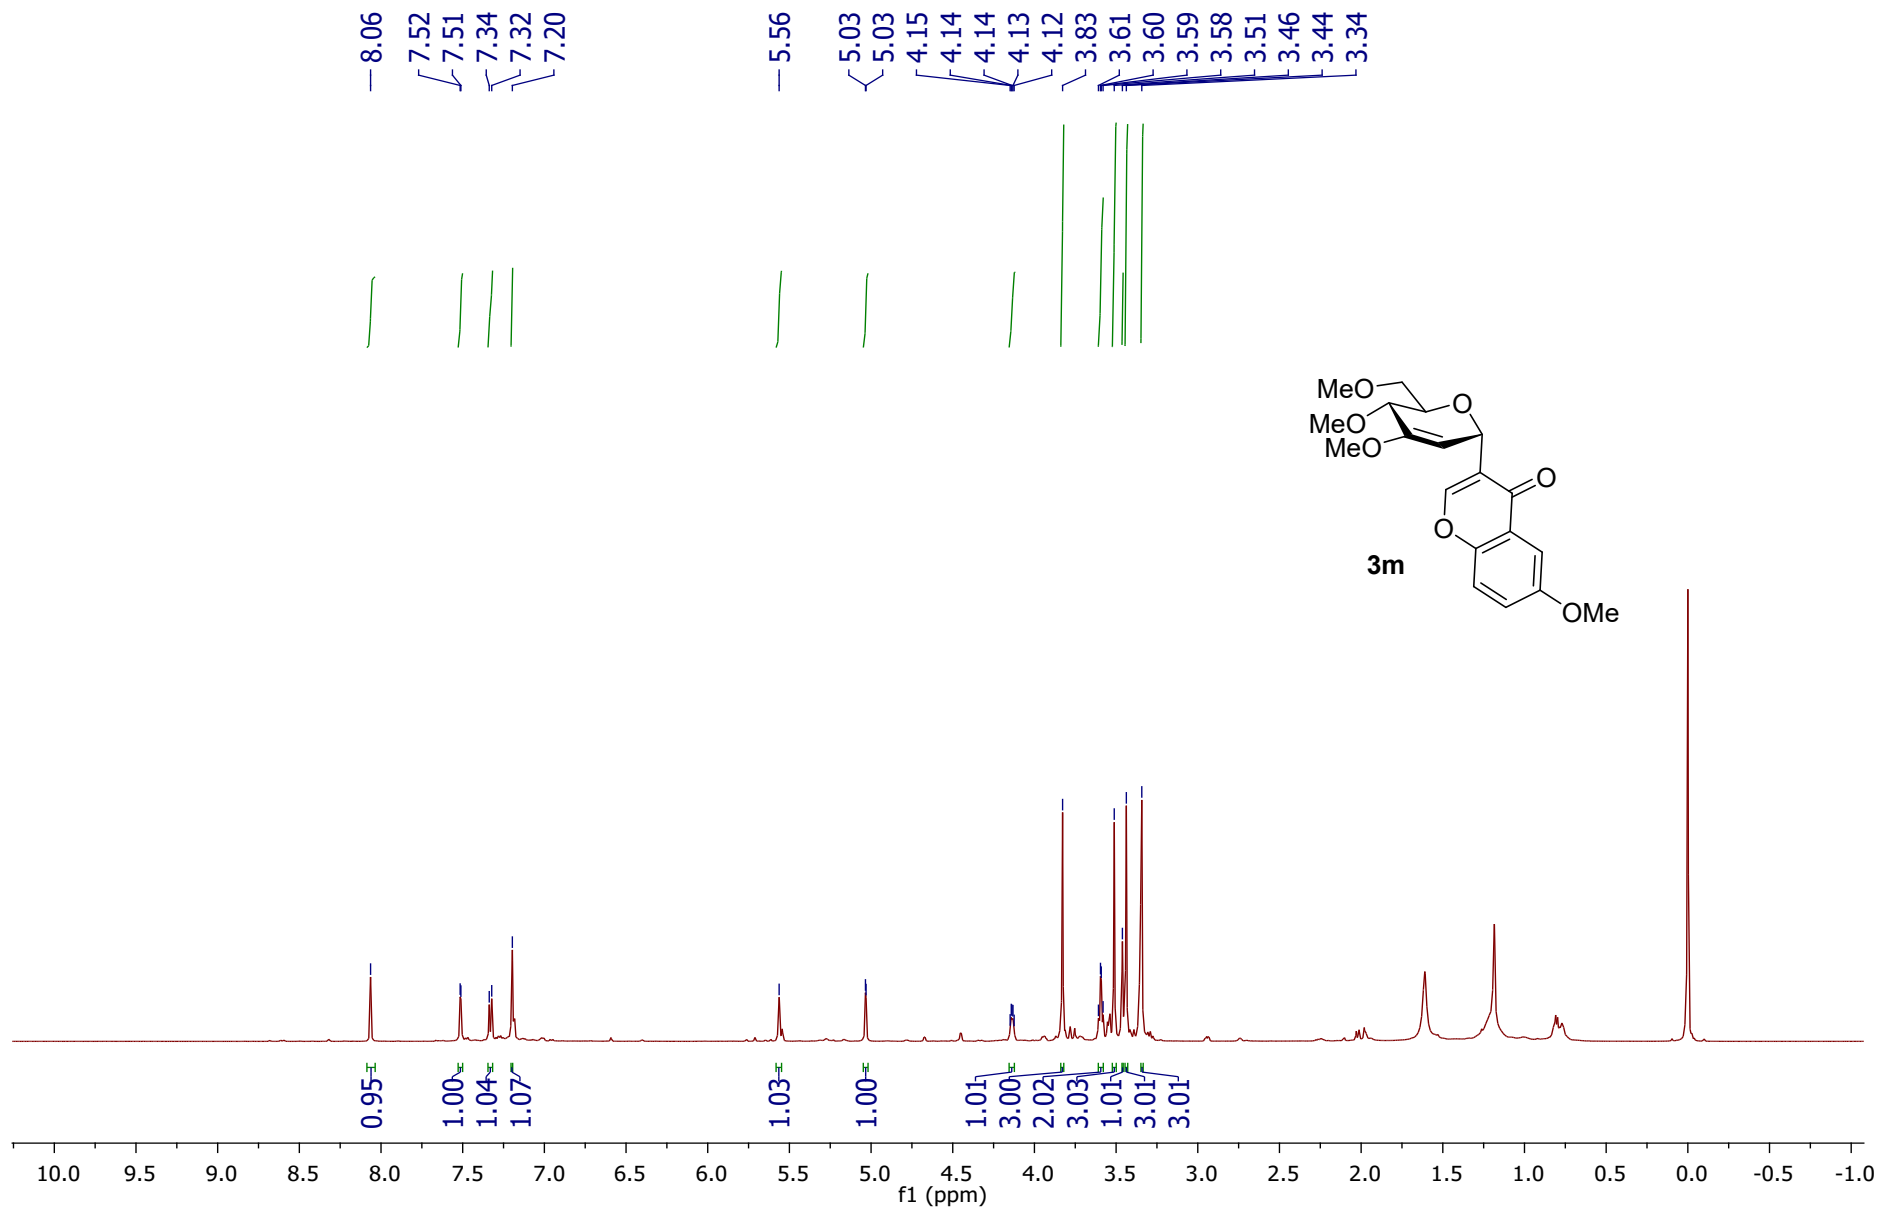

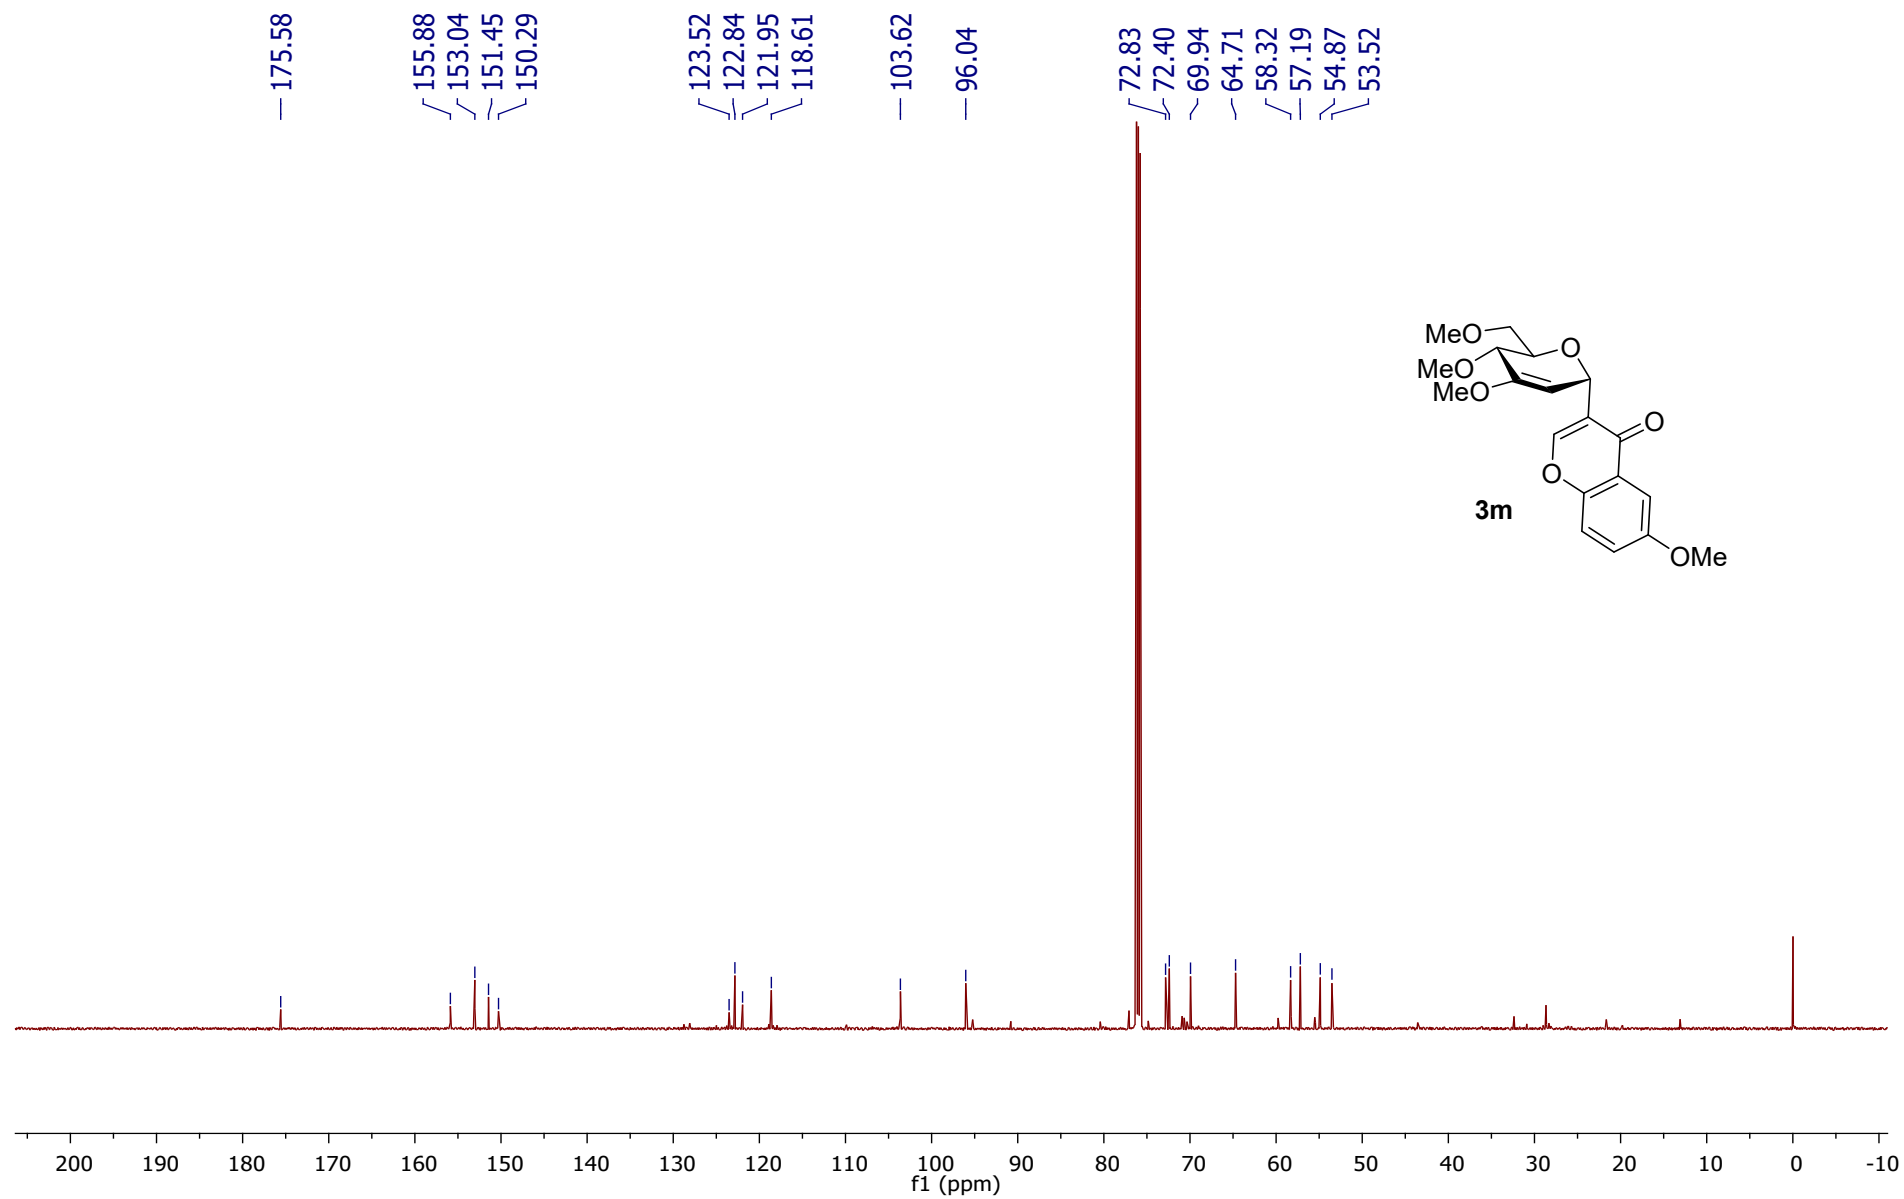

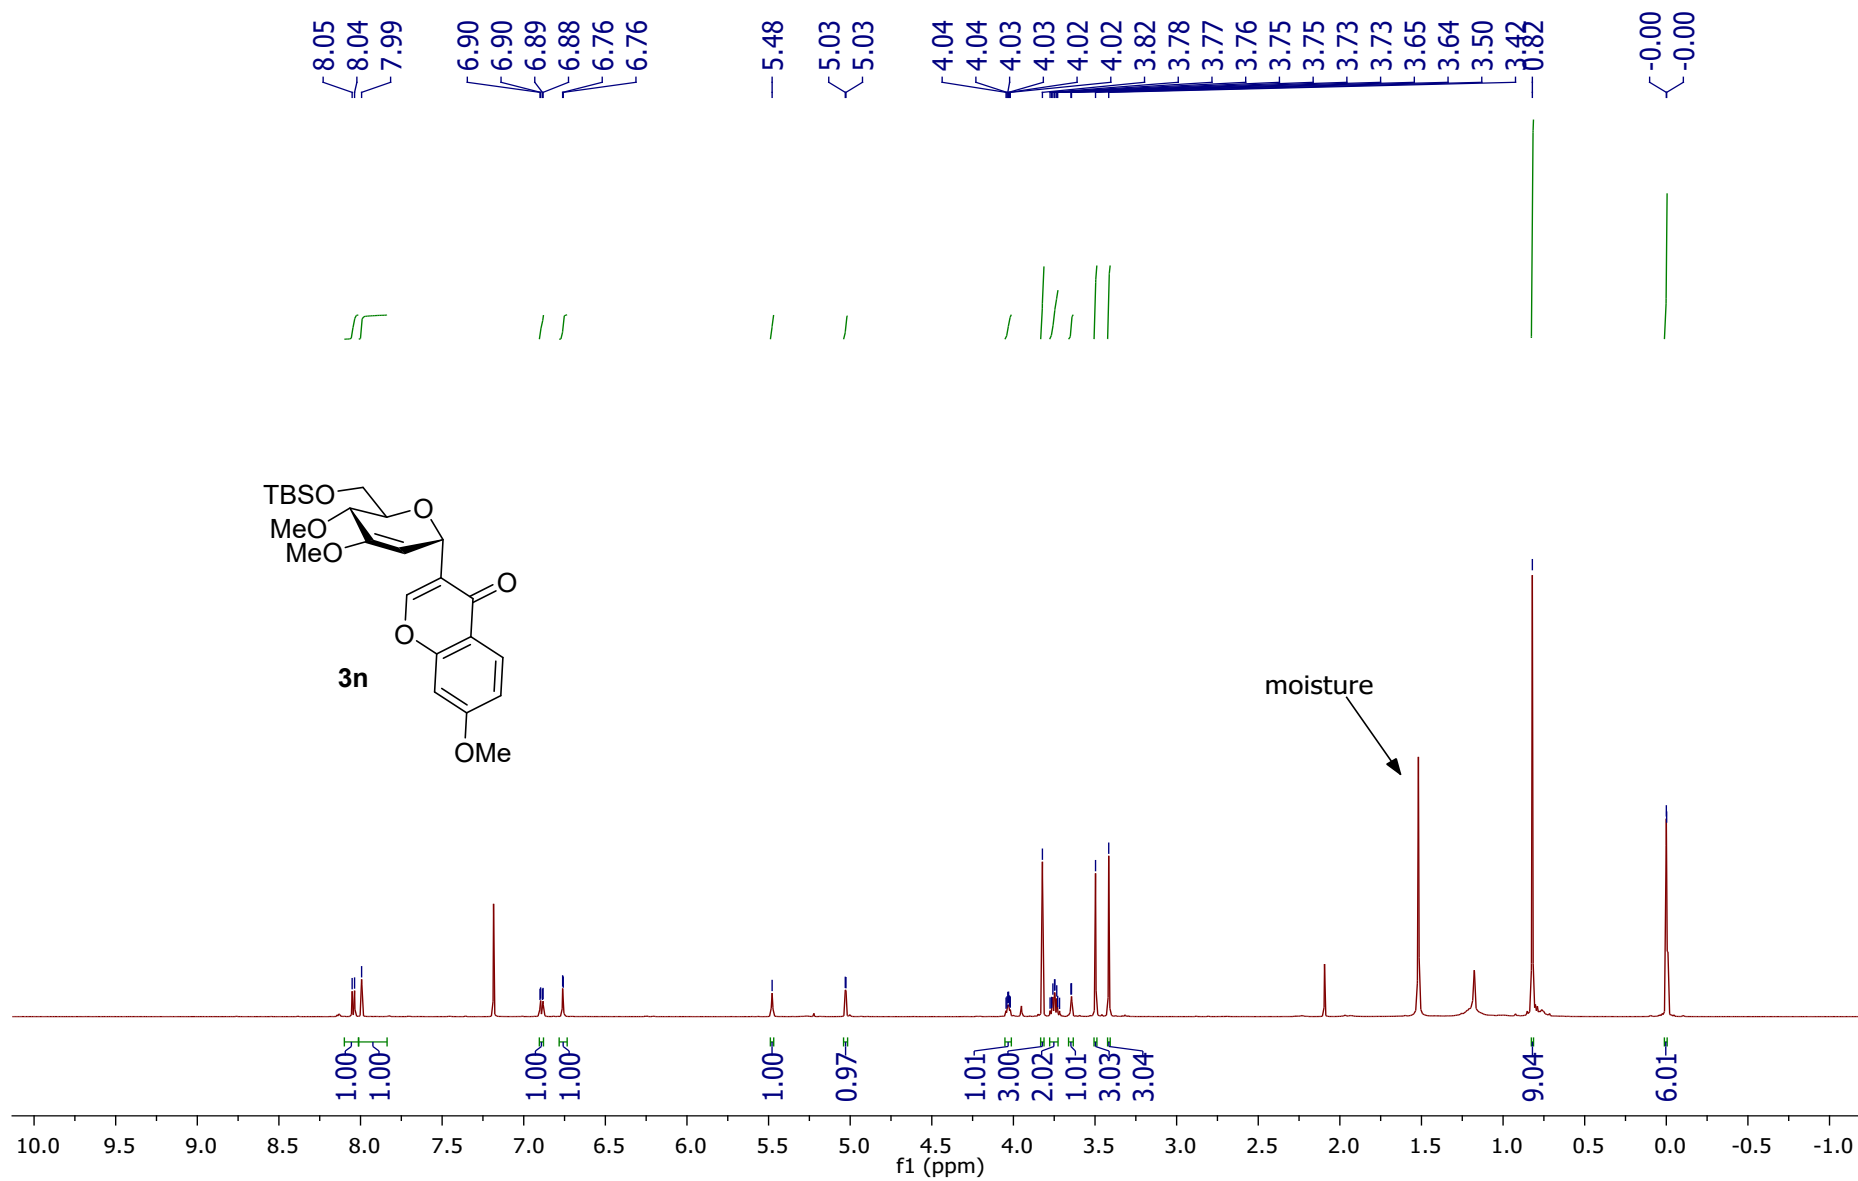



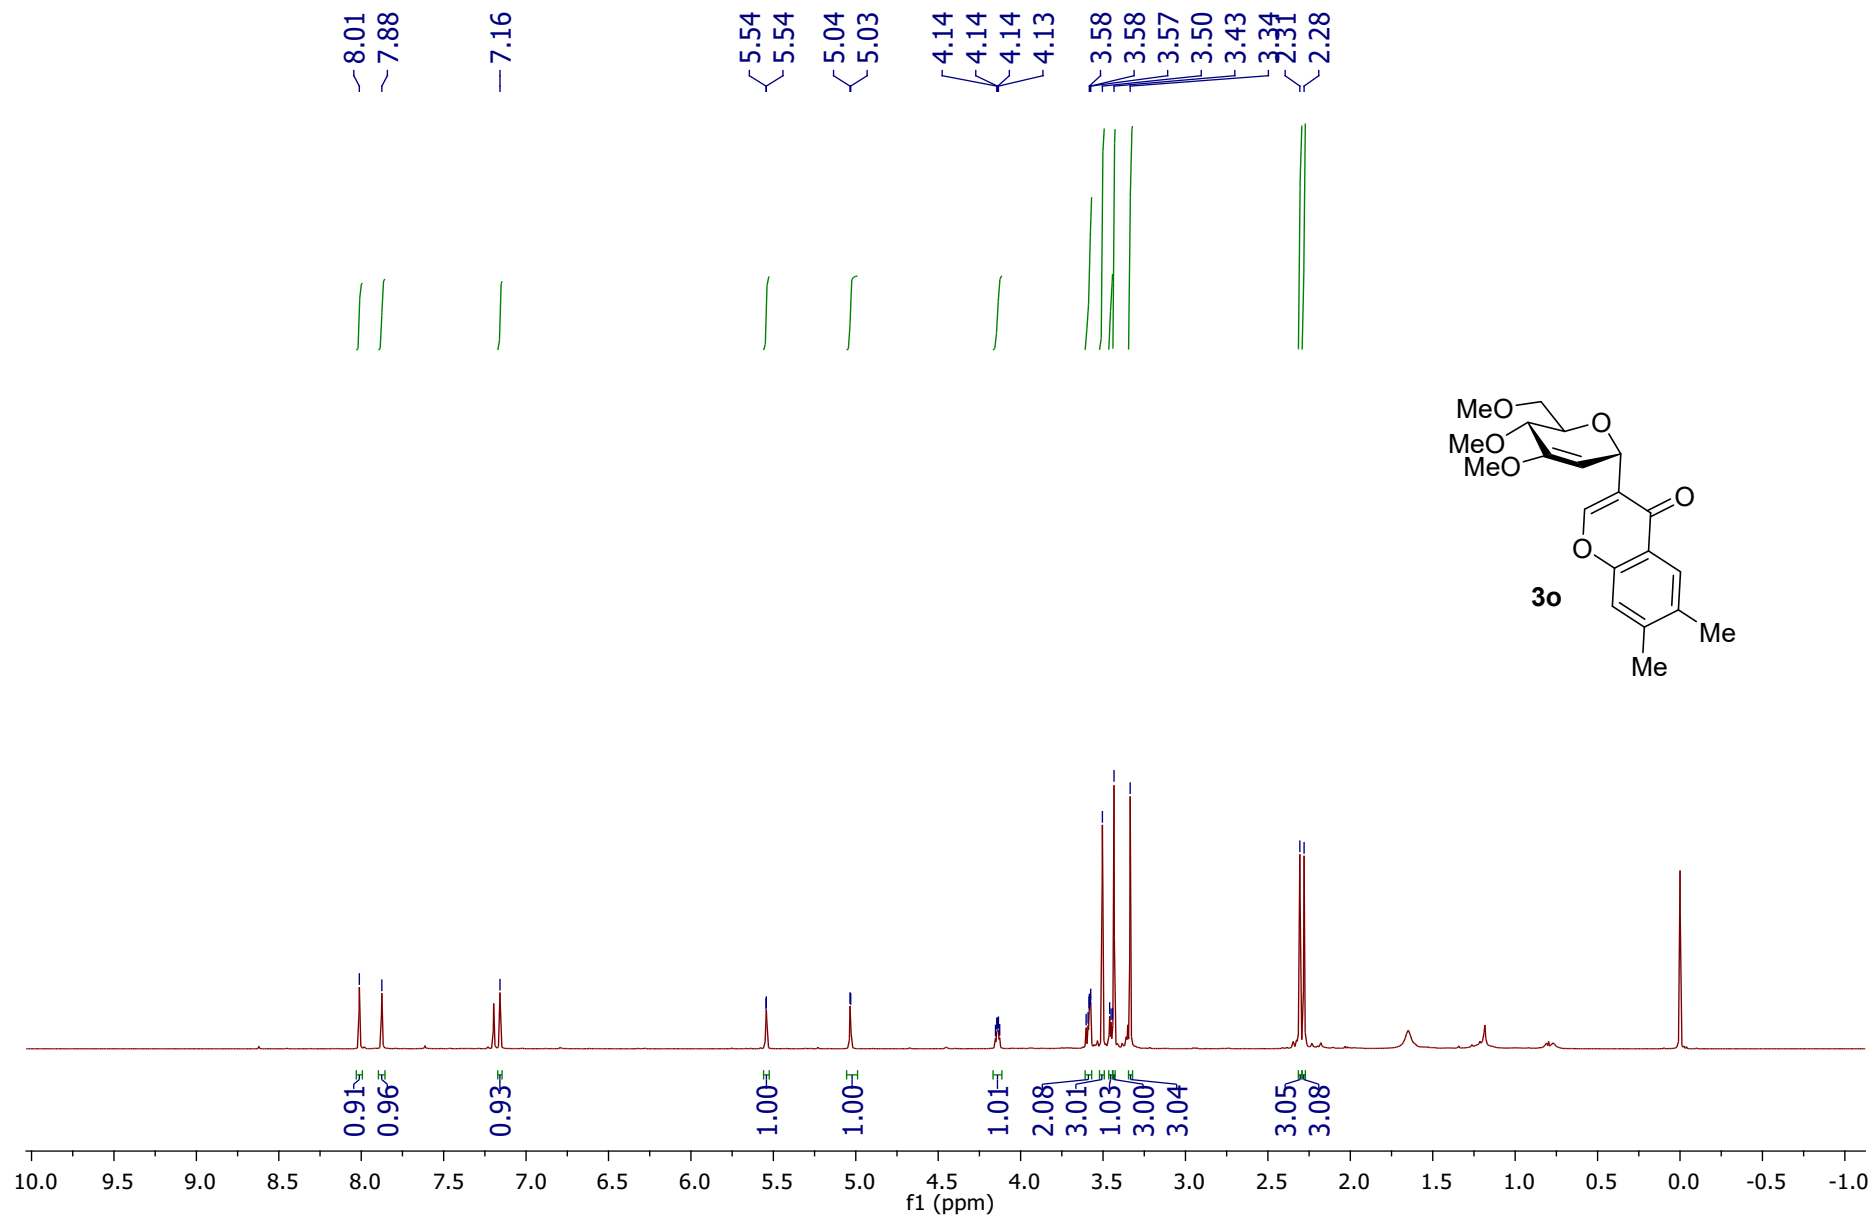



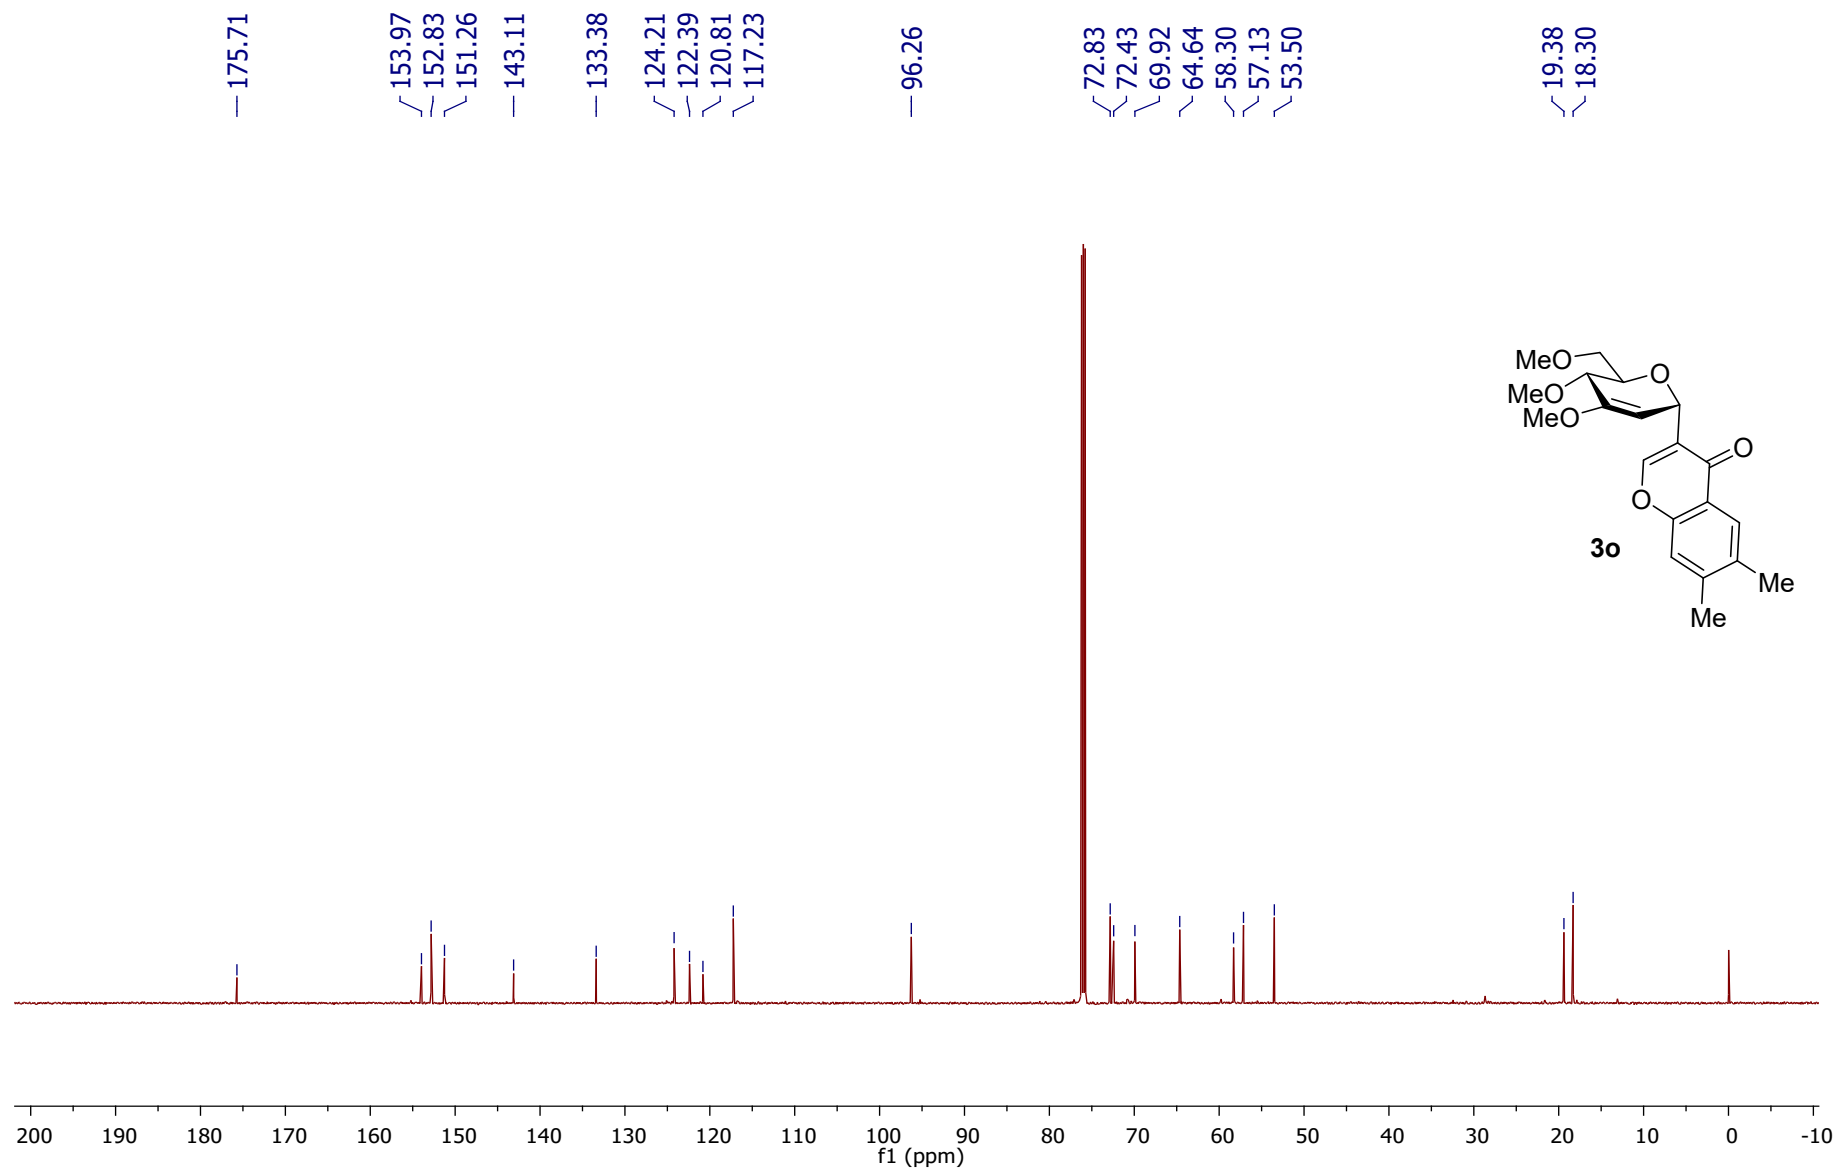

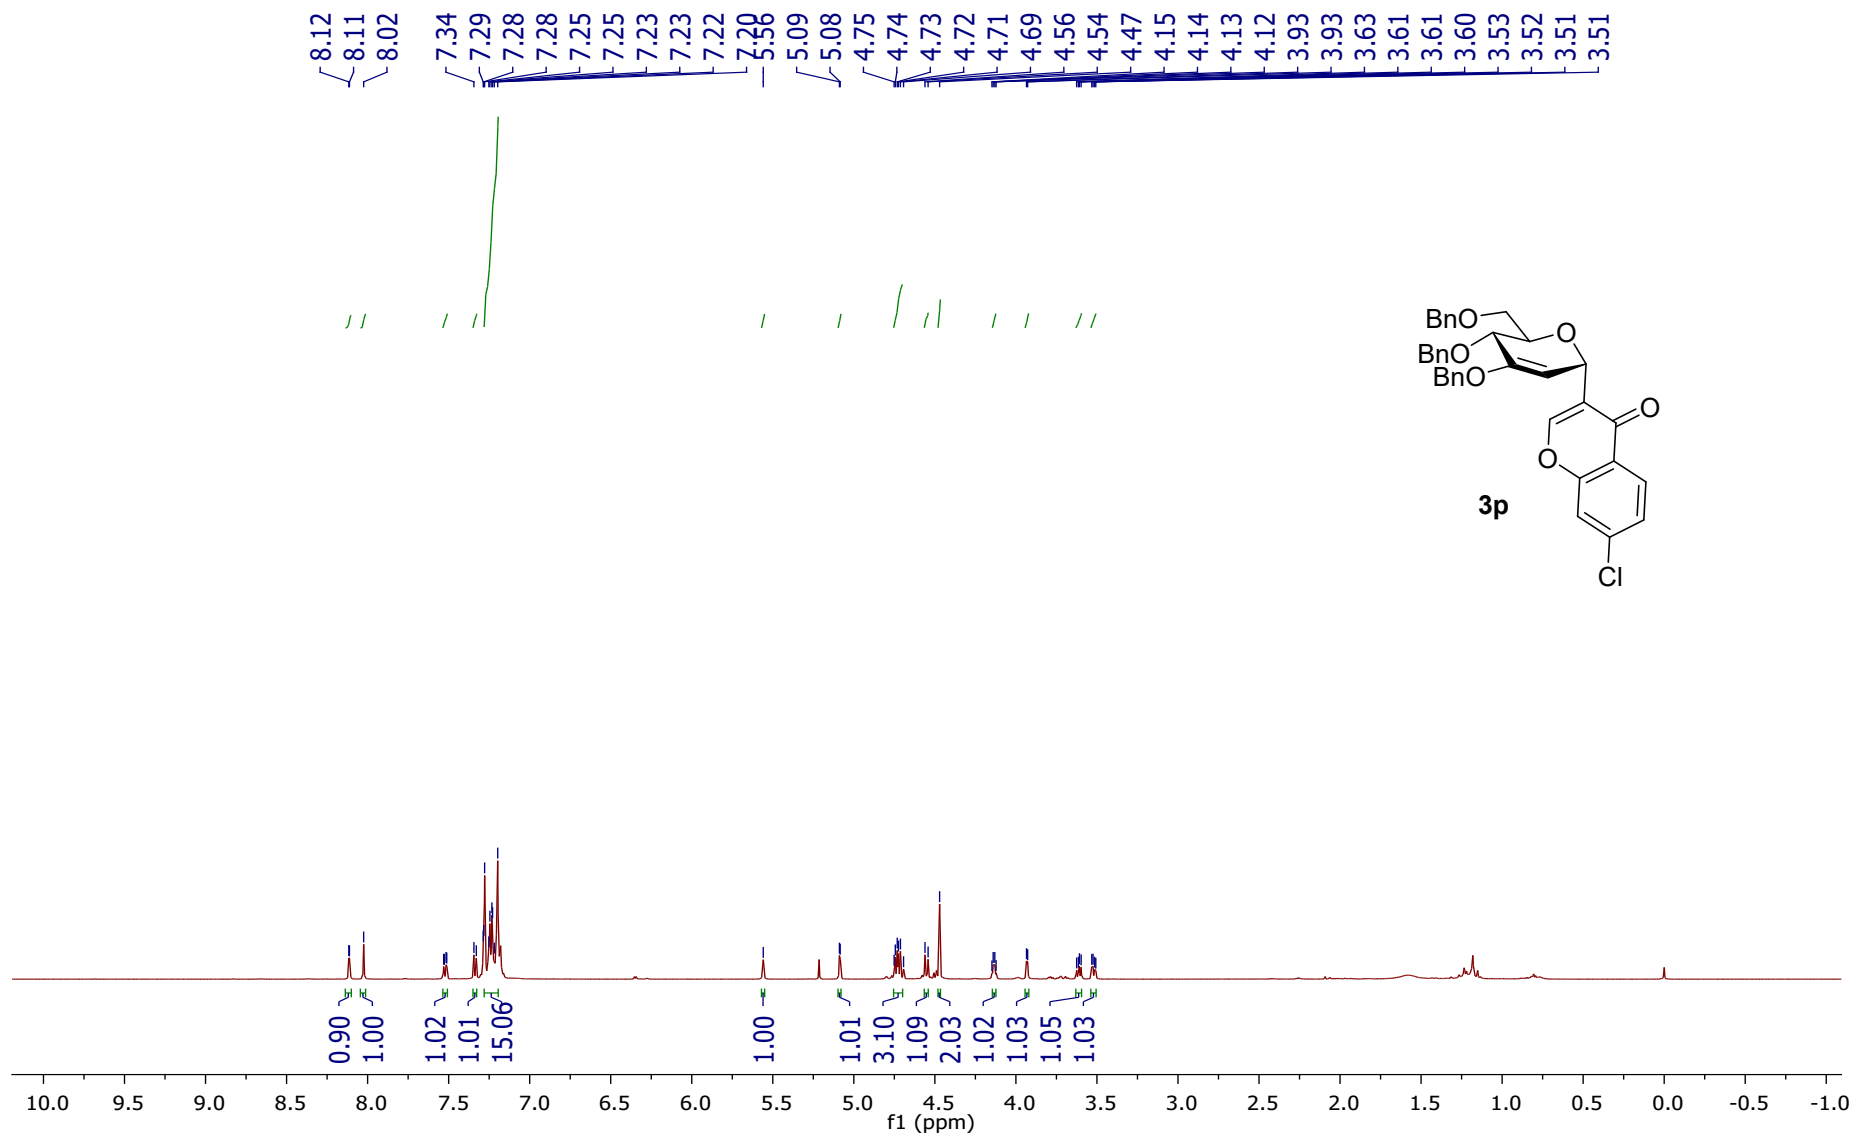

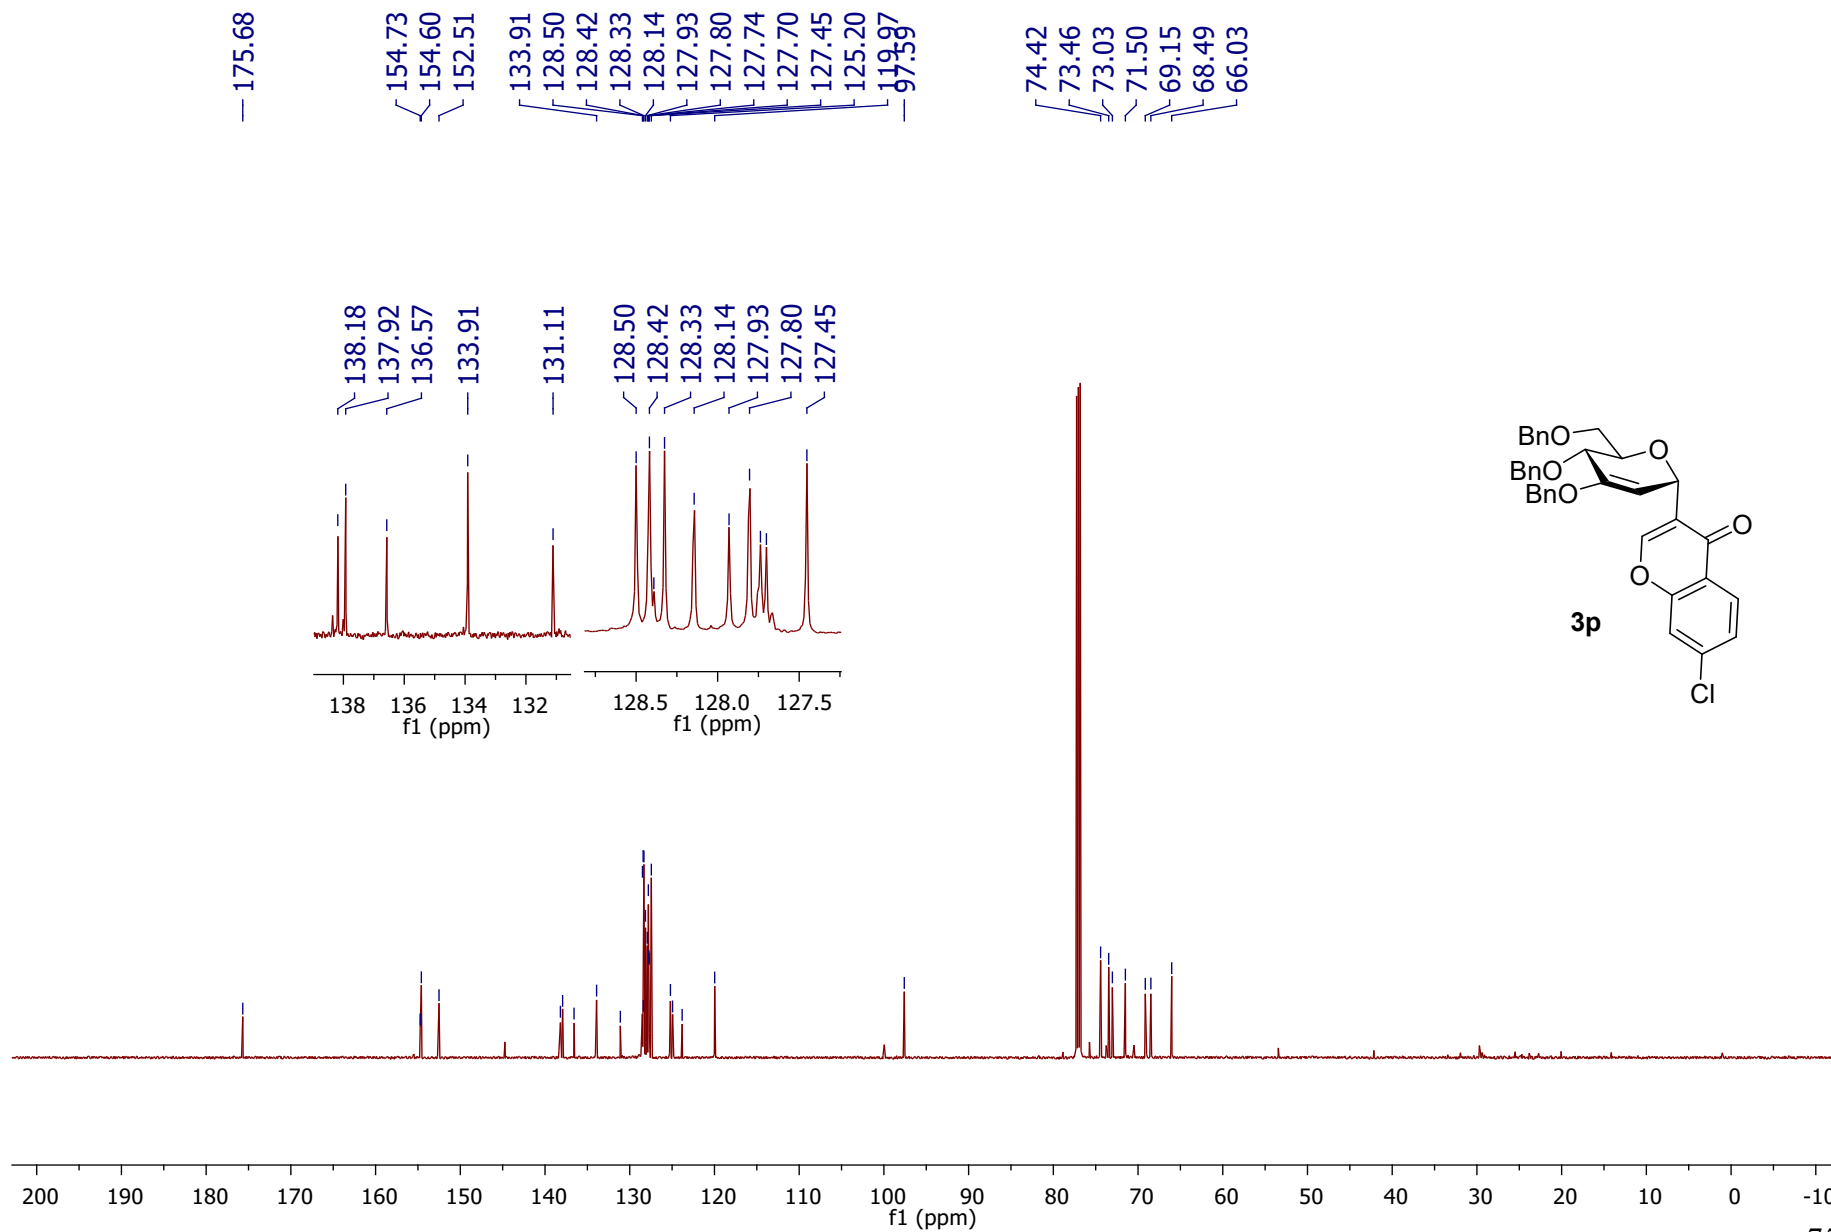

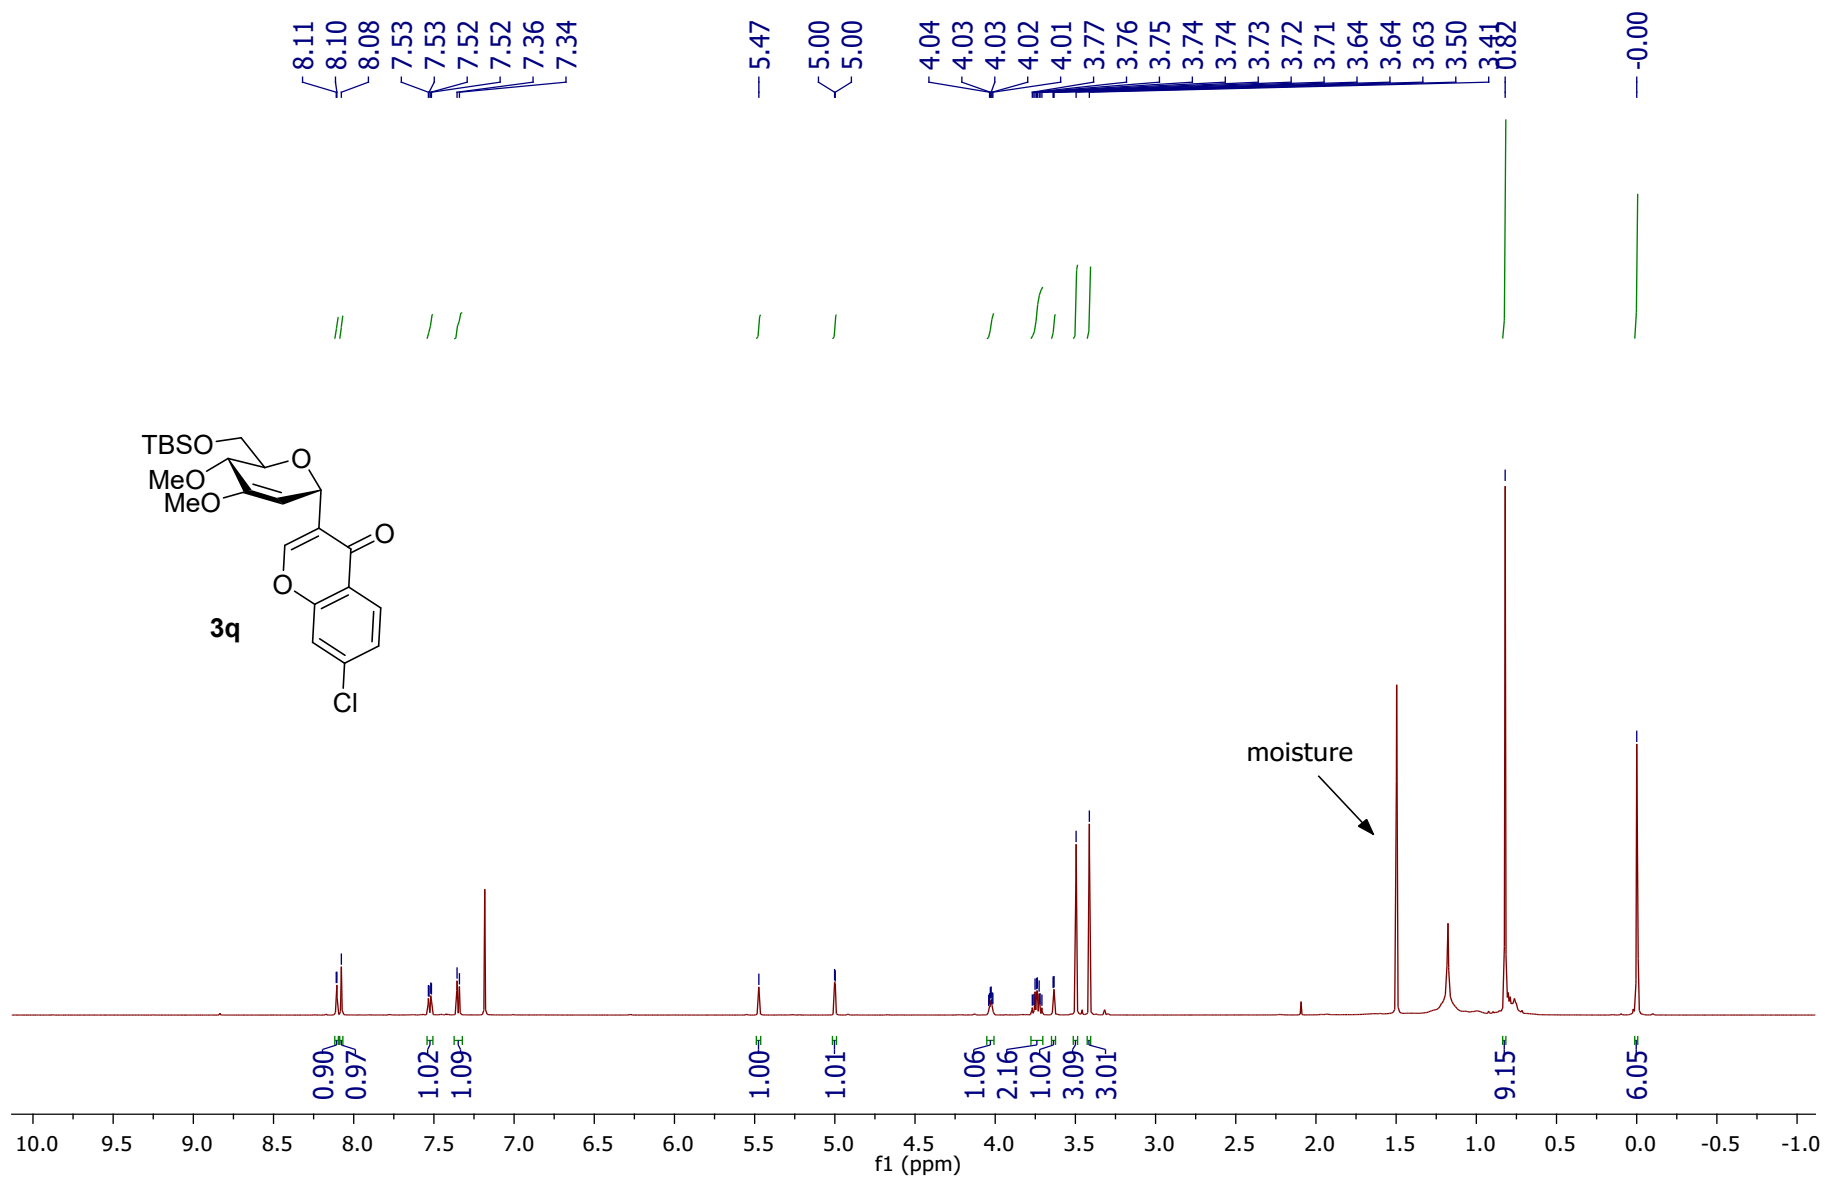

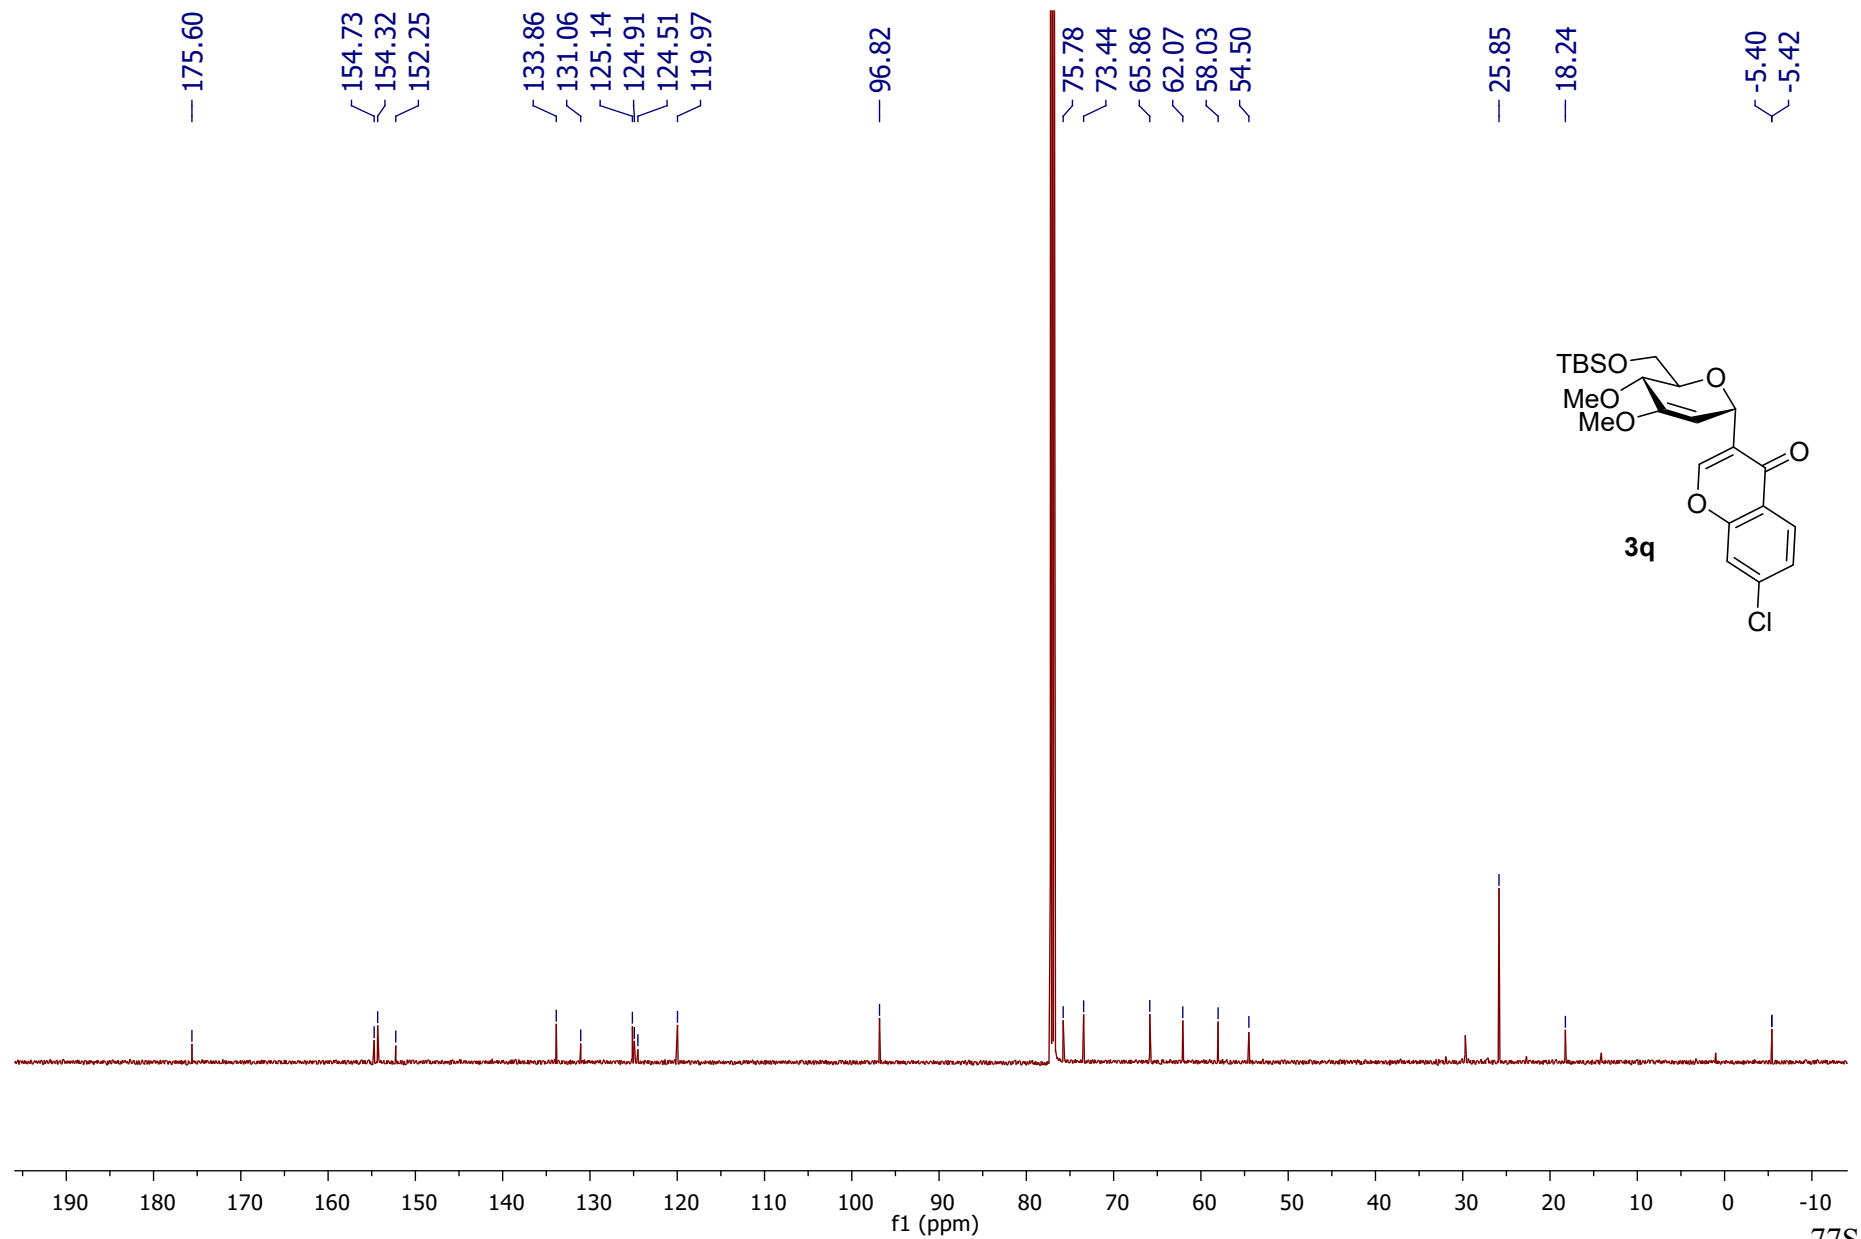

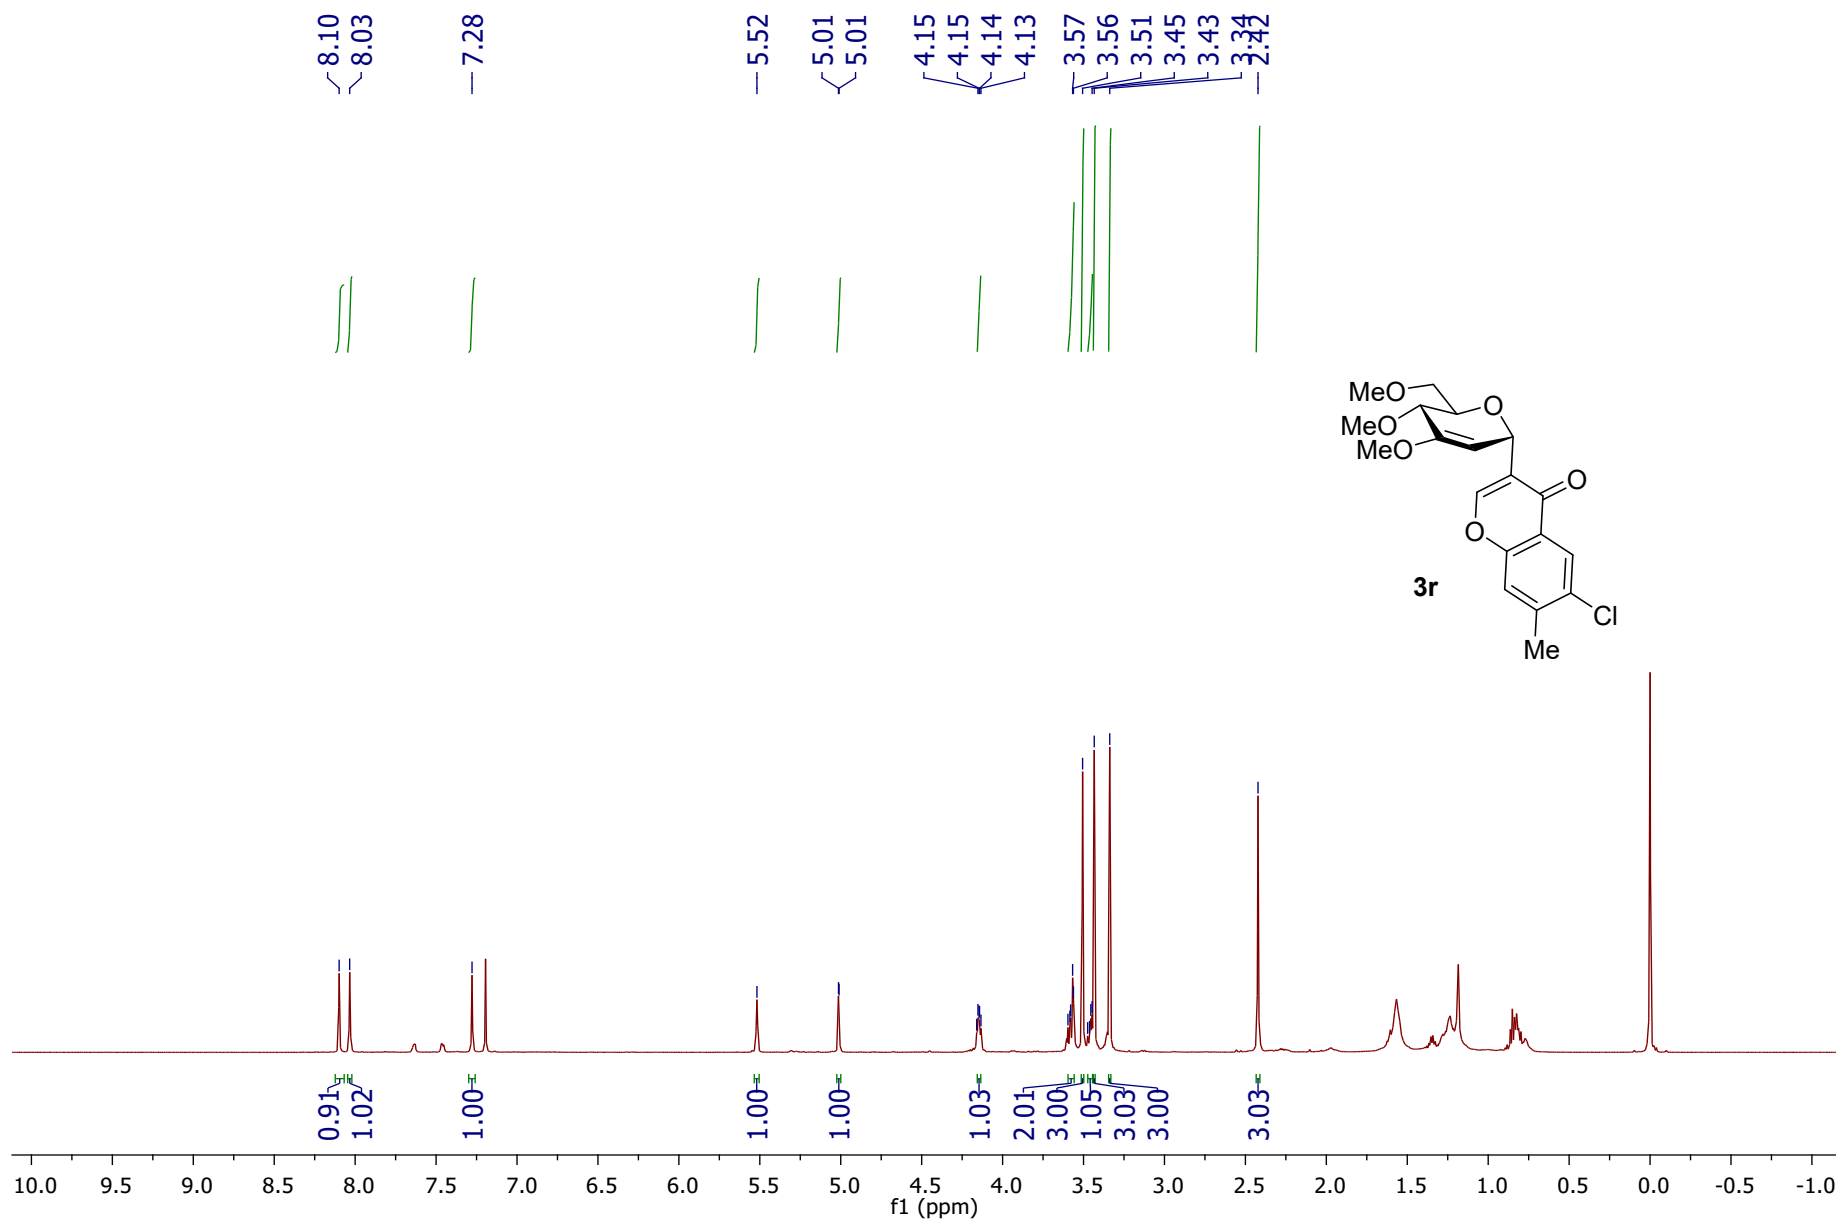

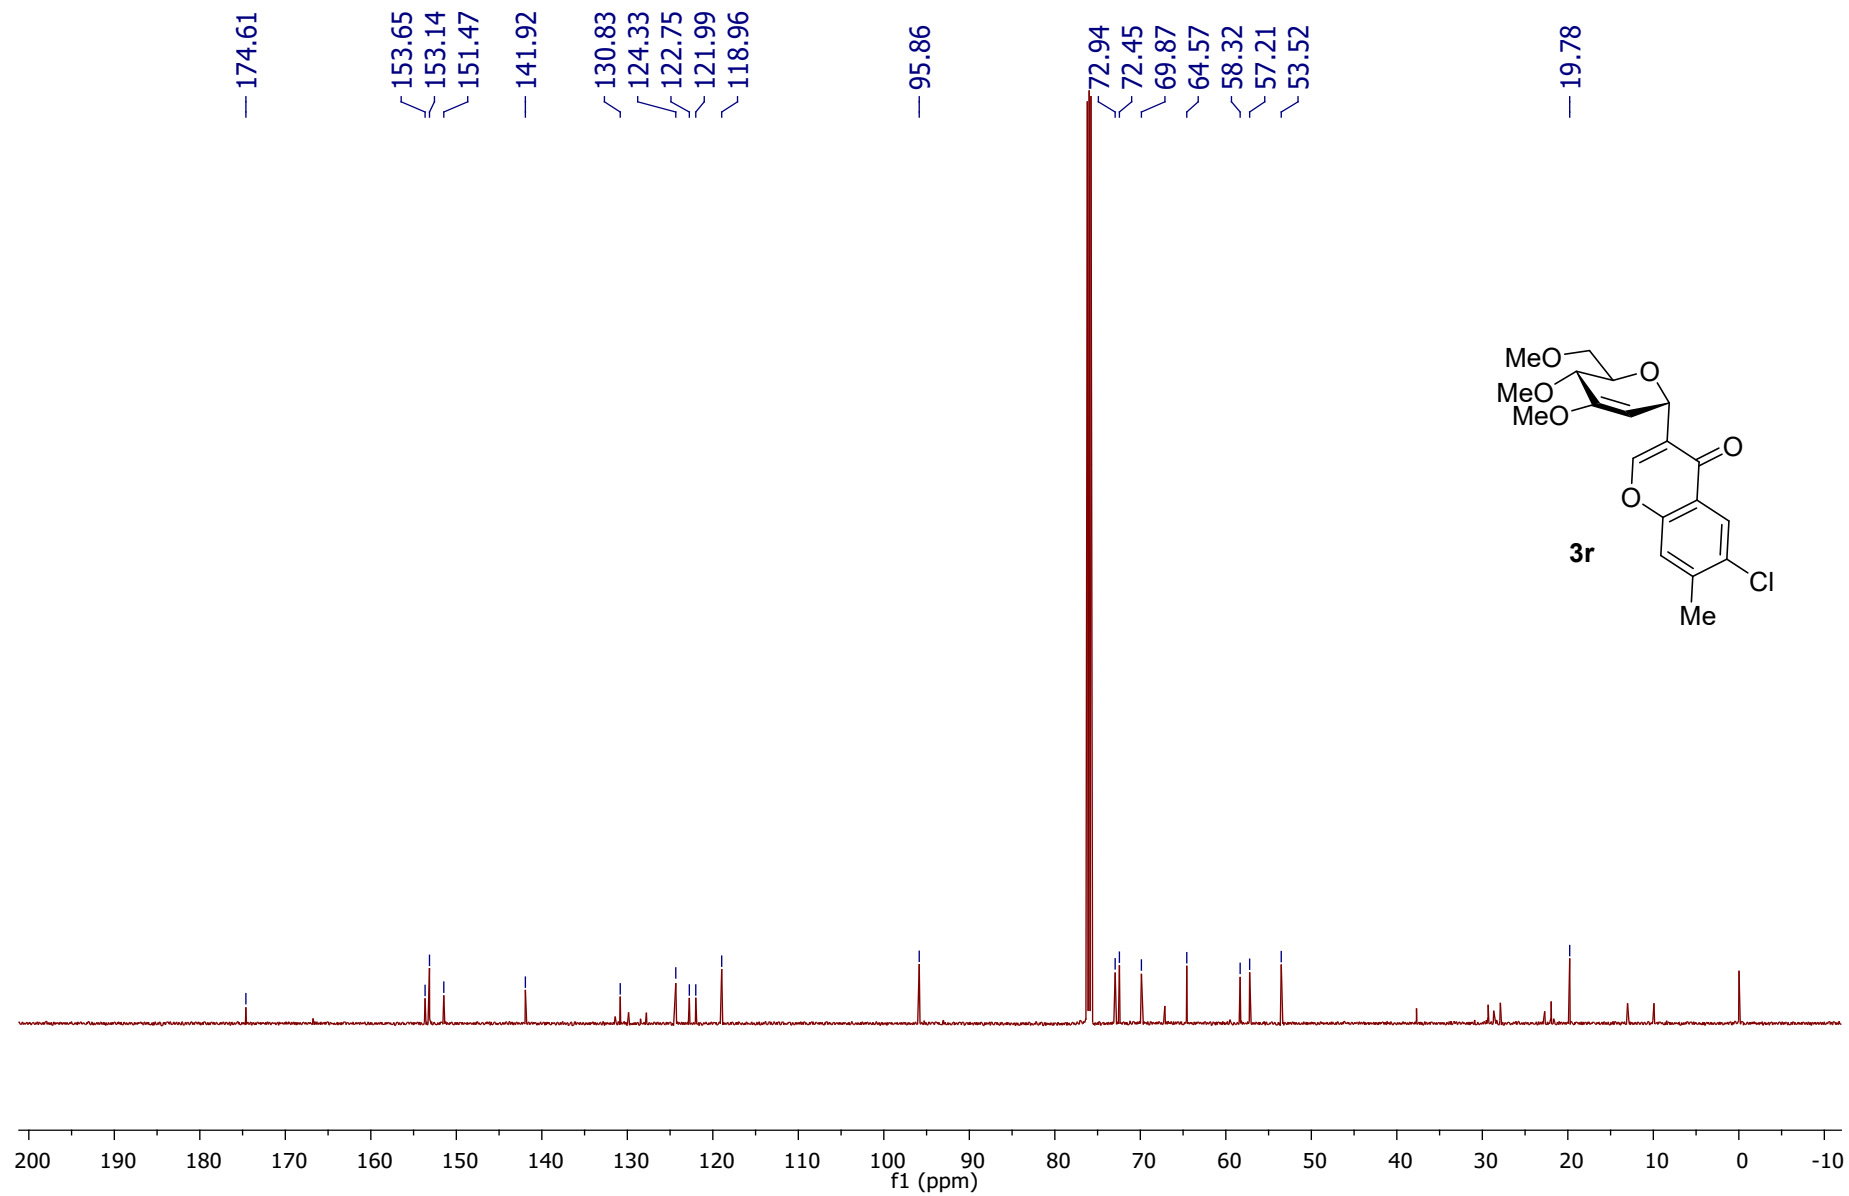

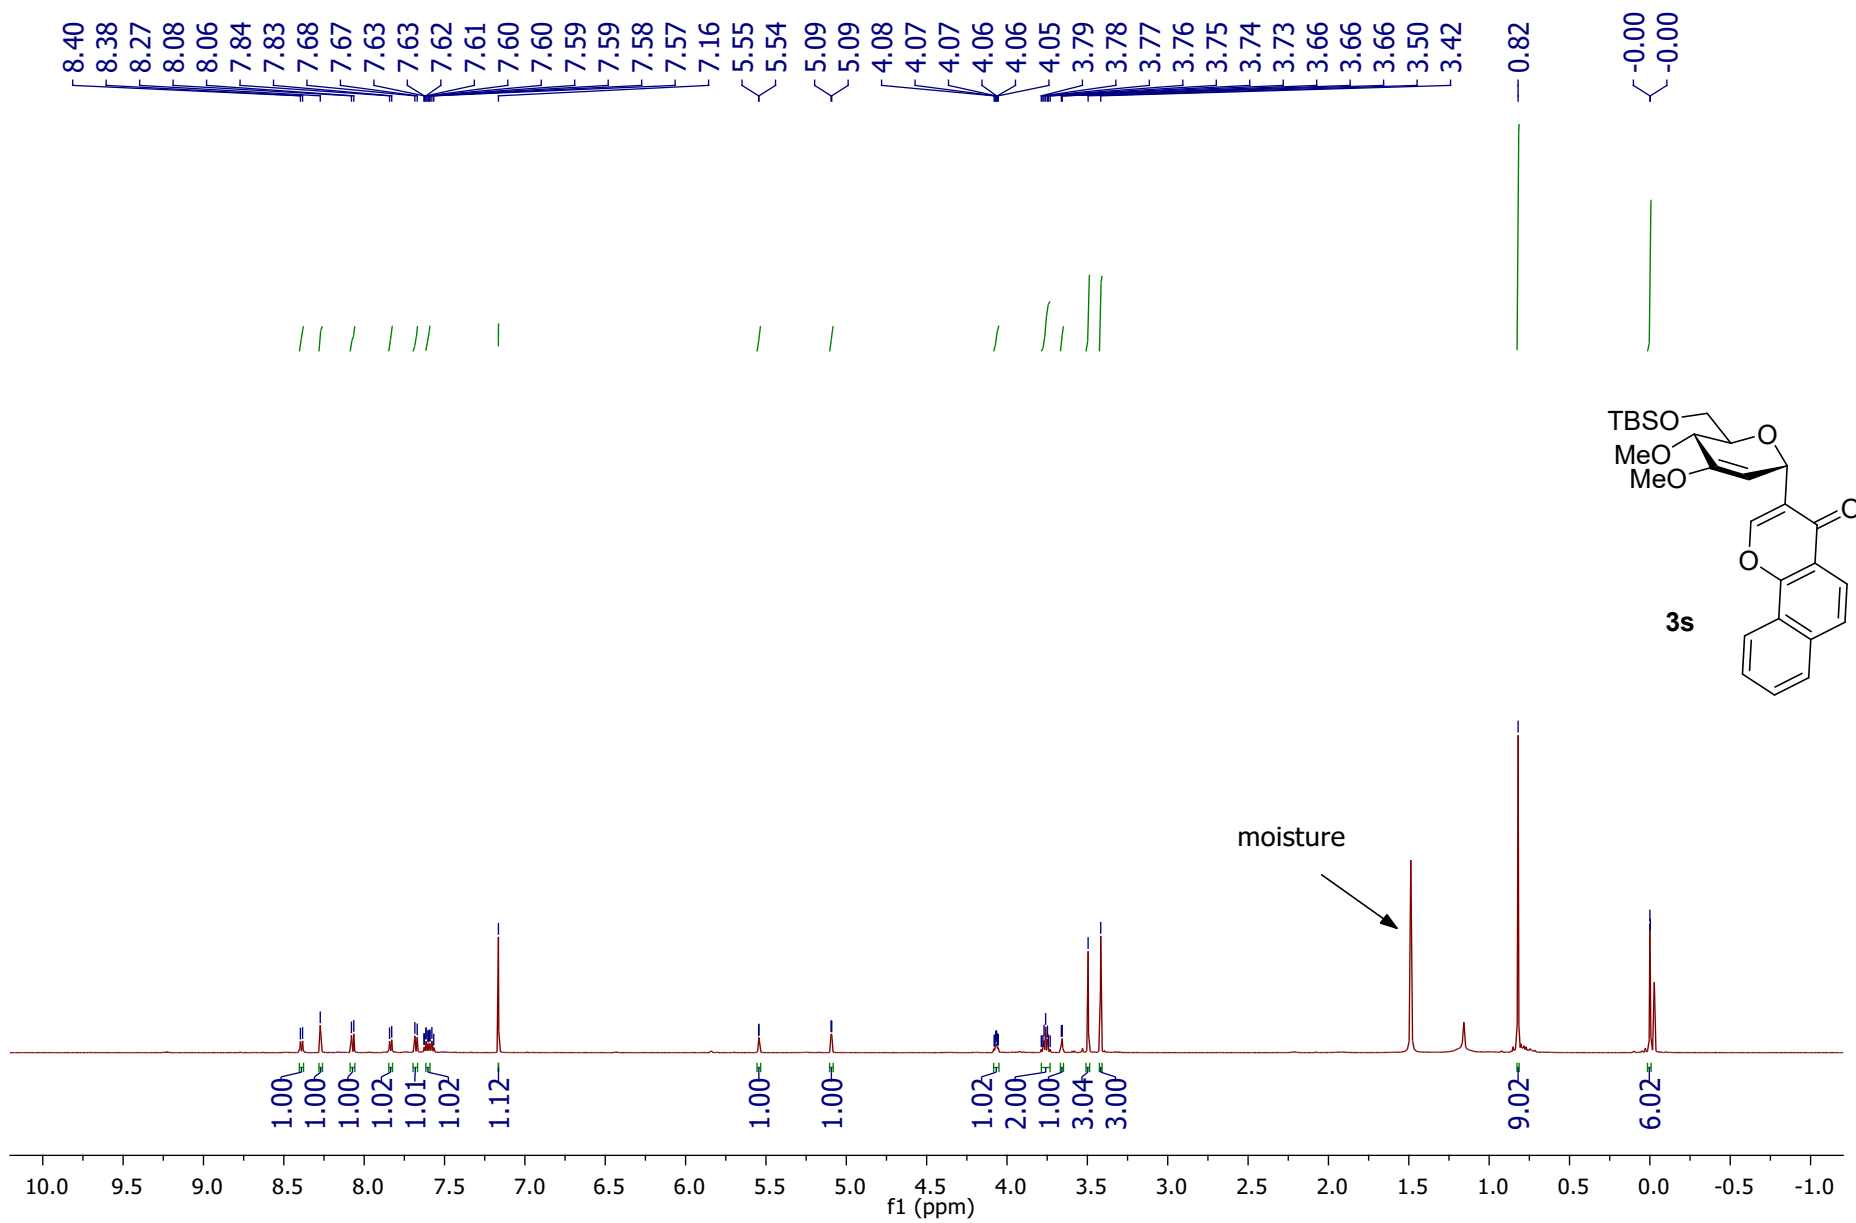

80S



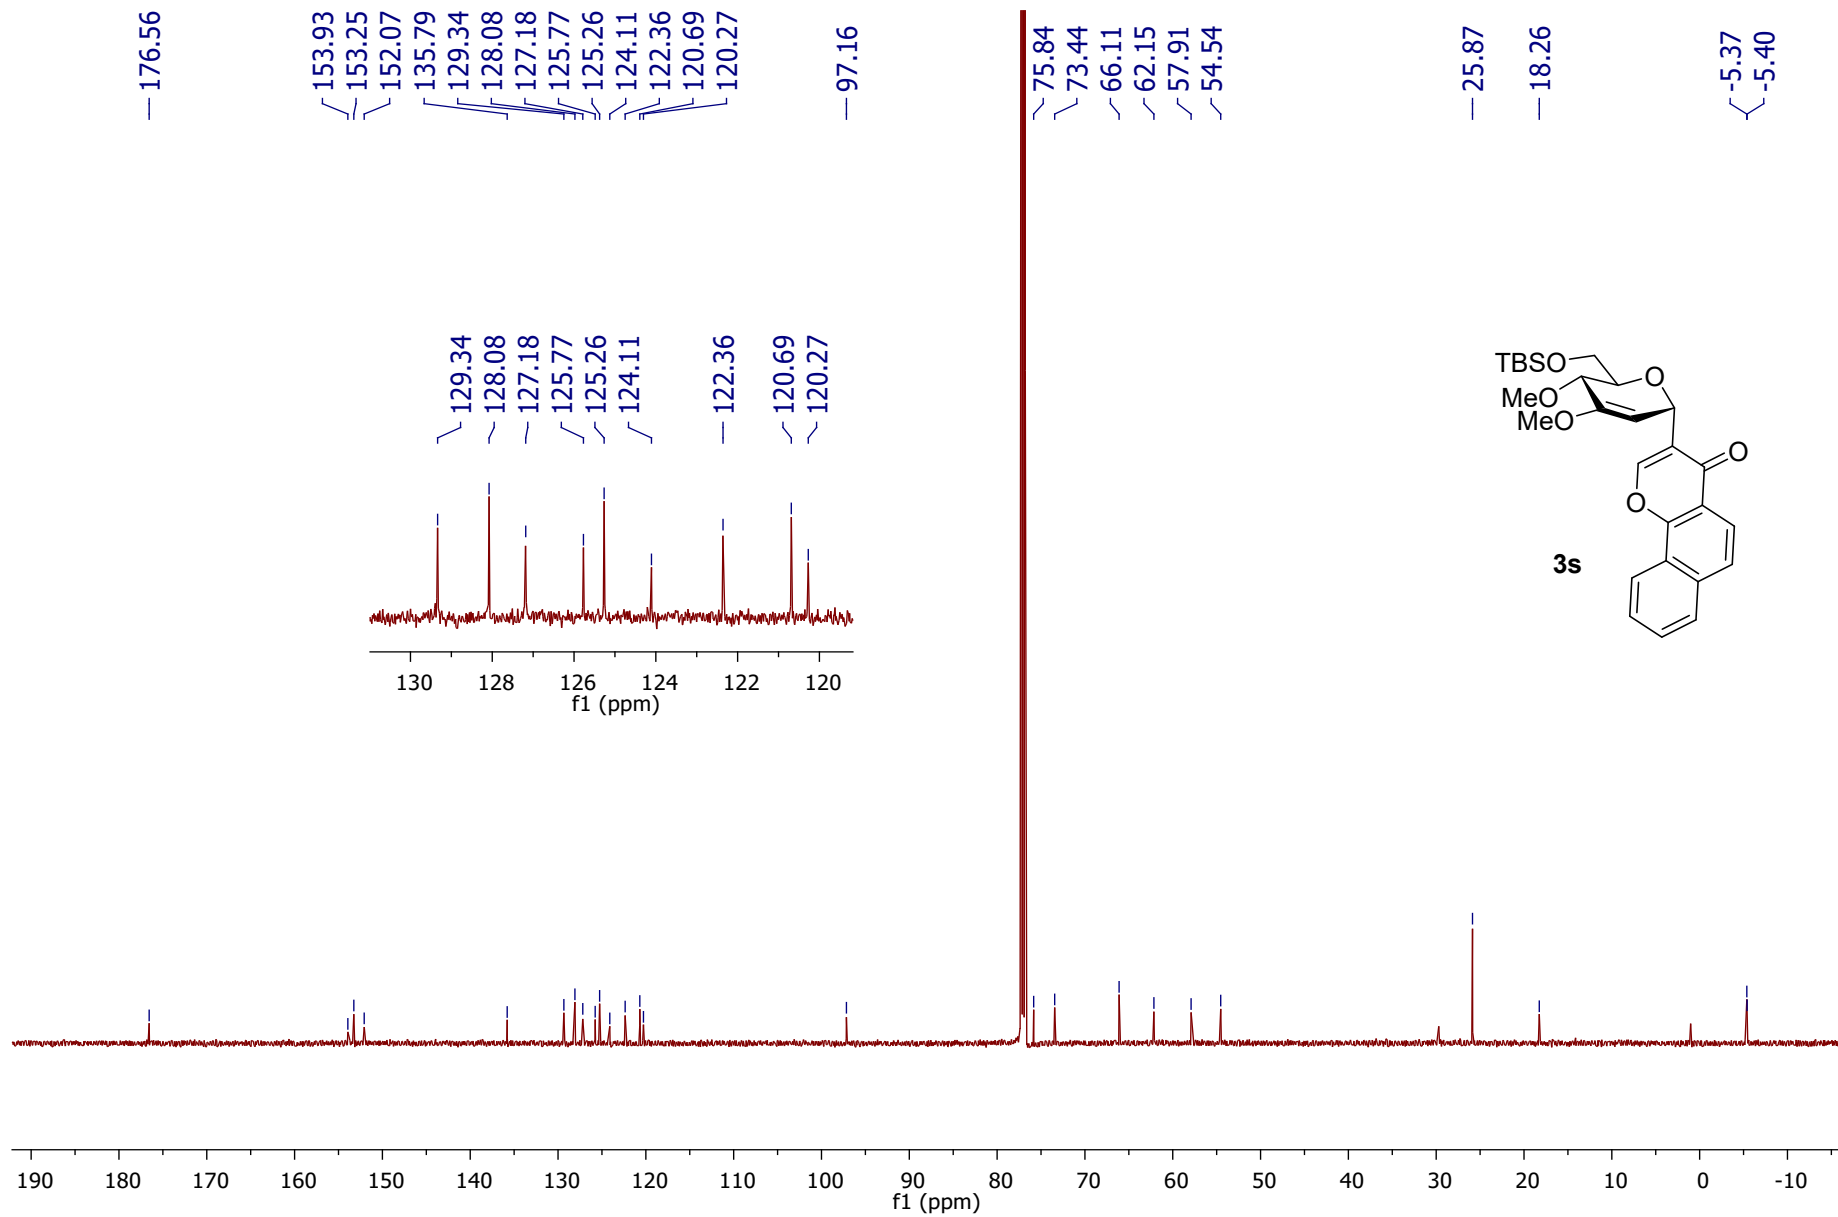



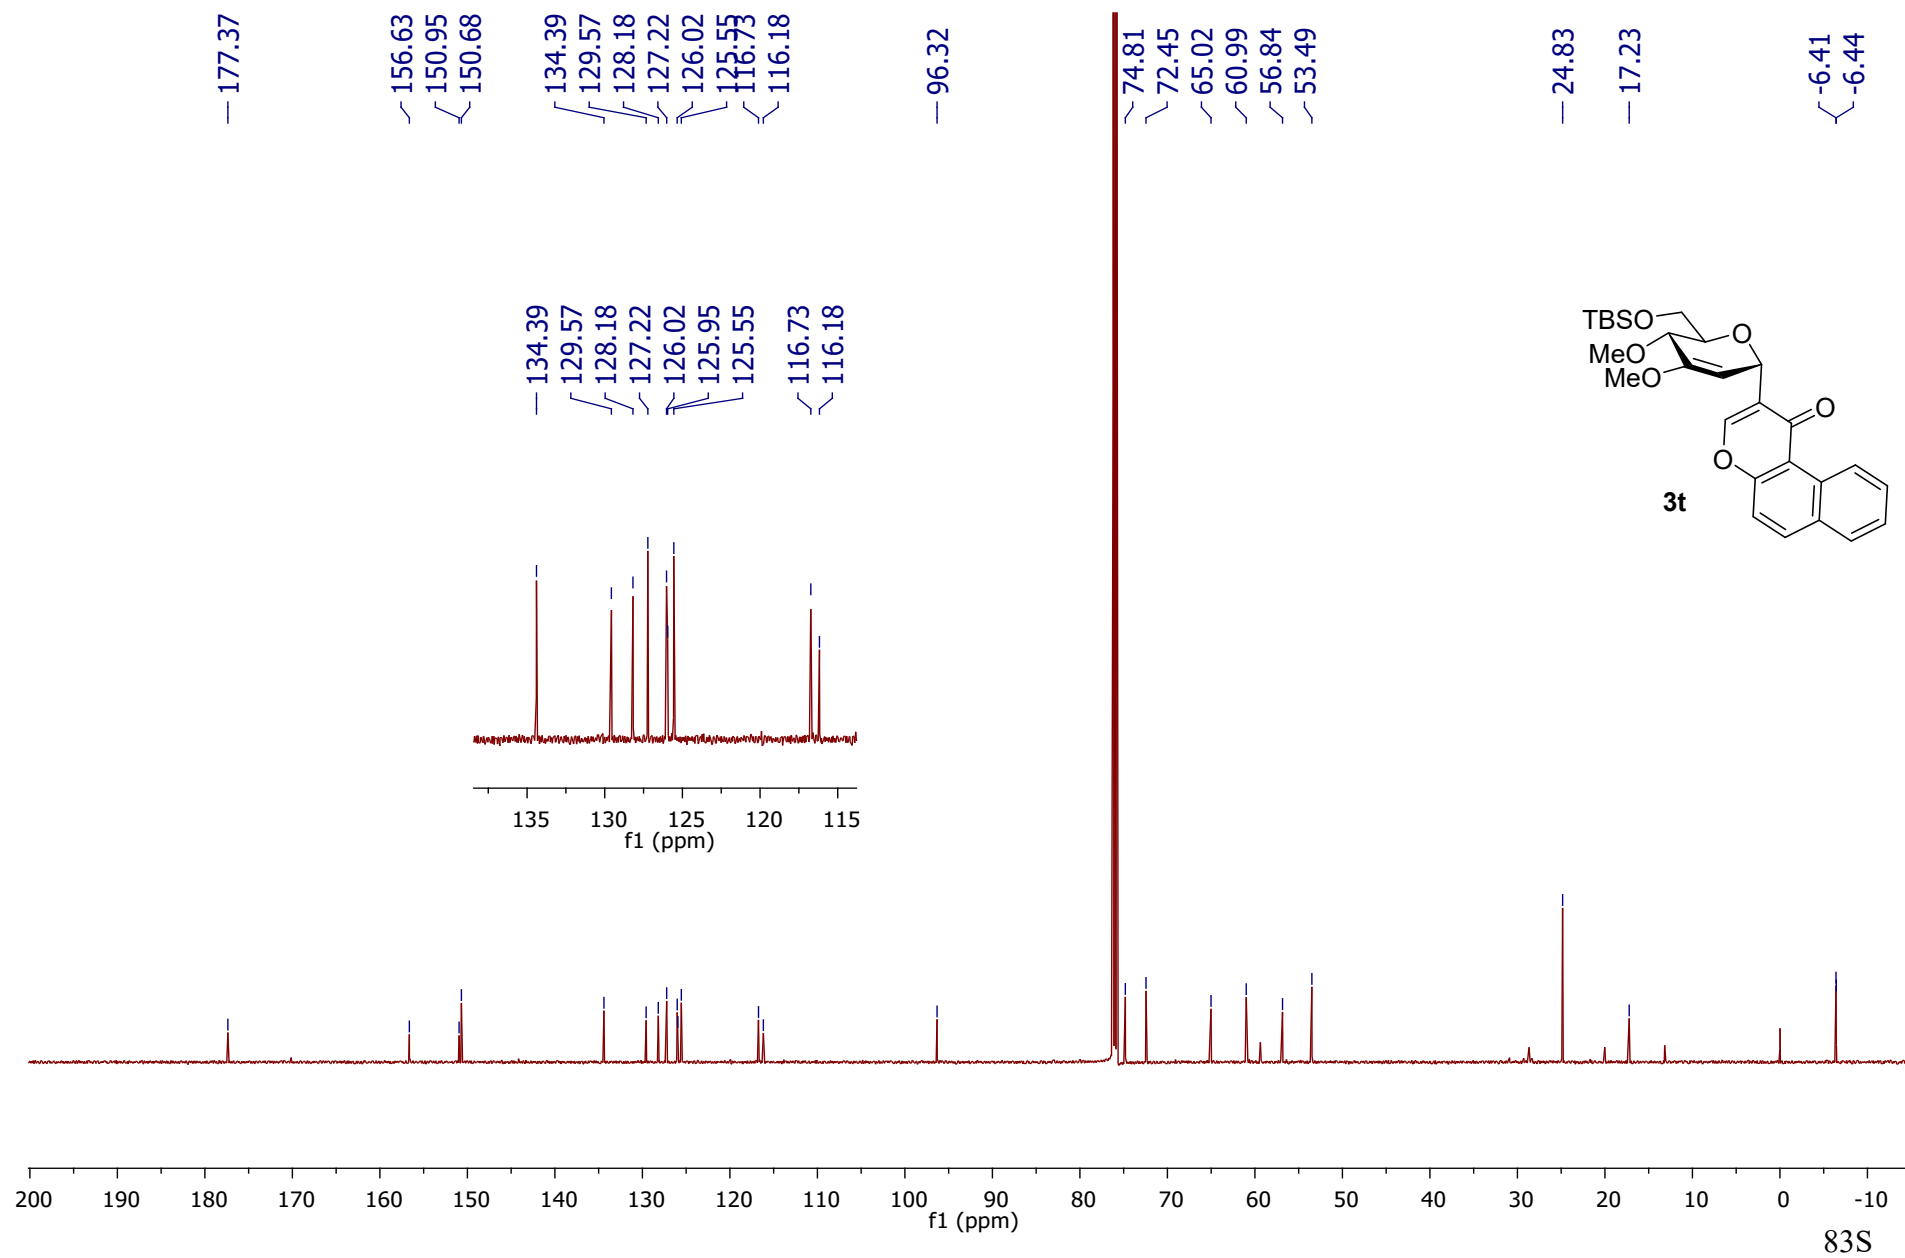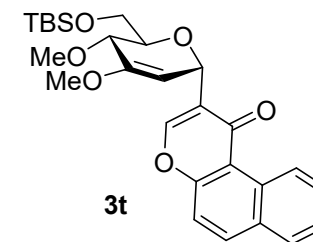

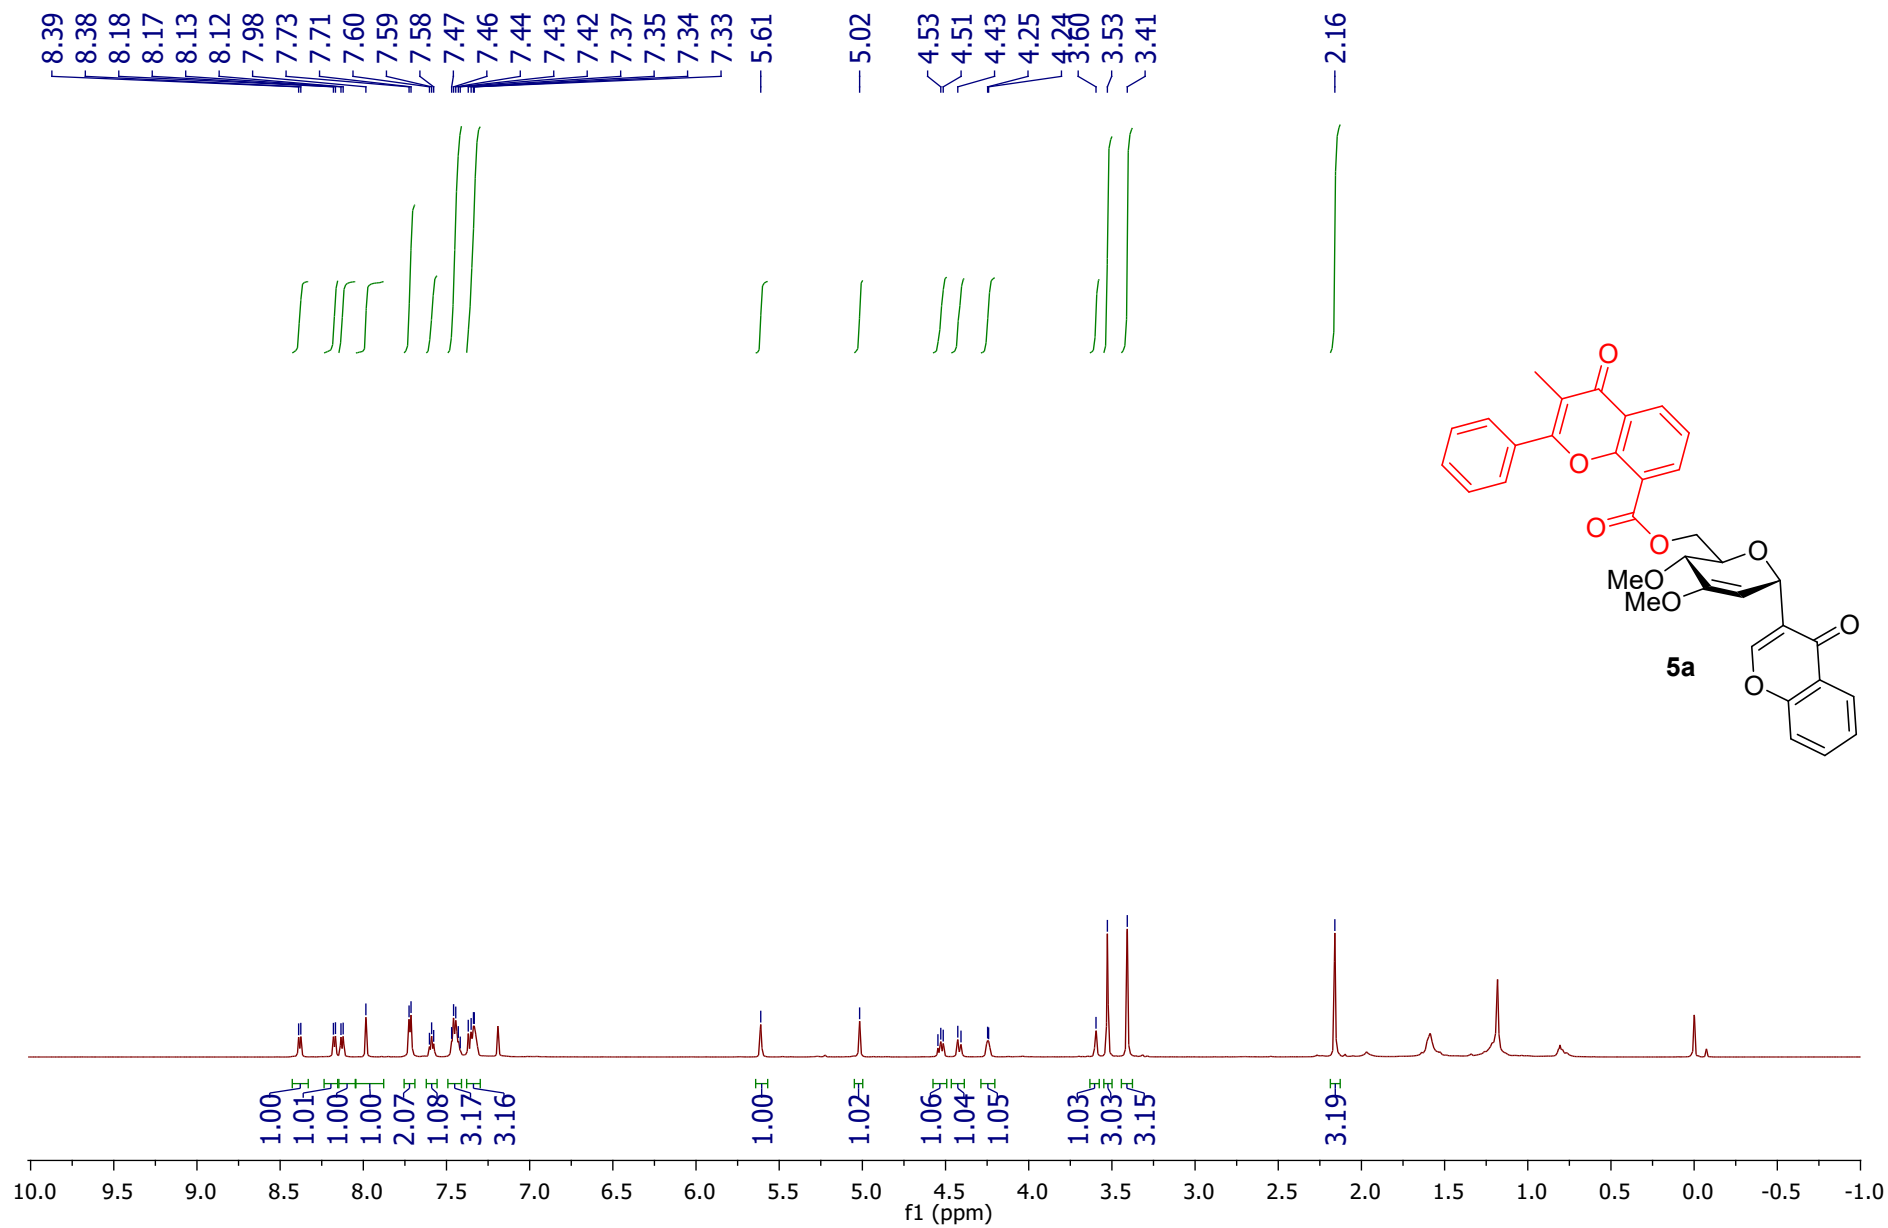

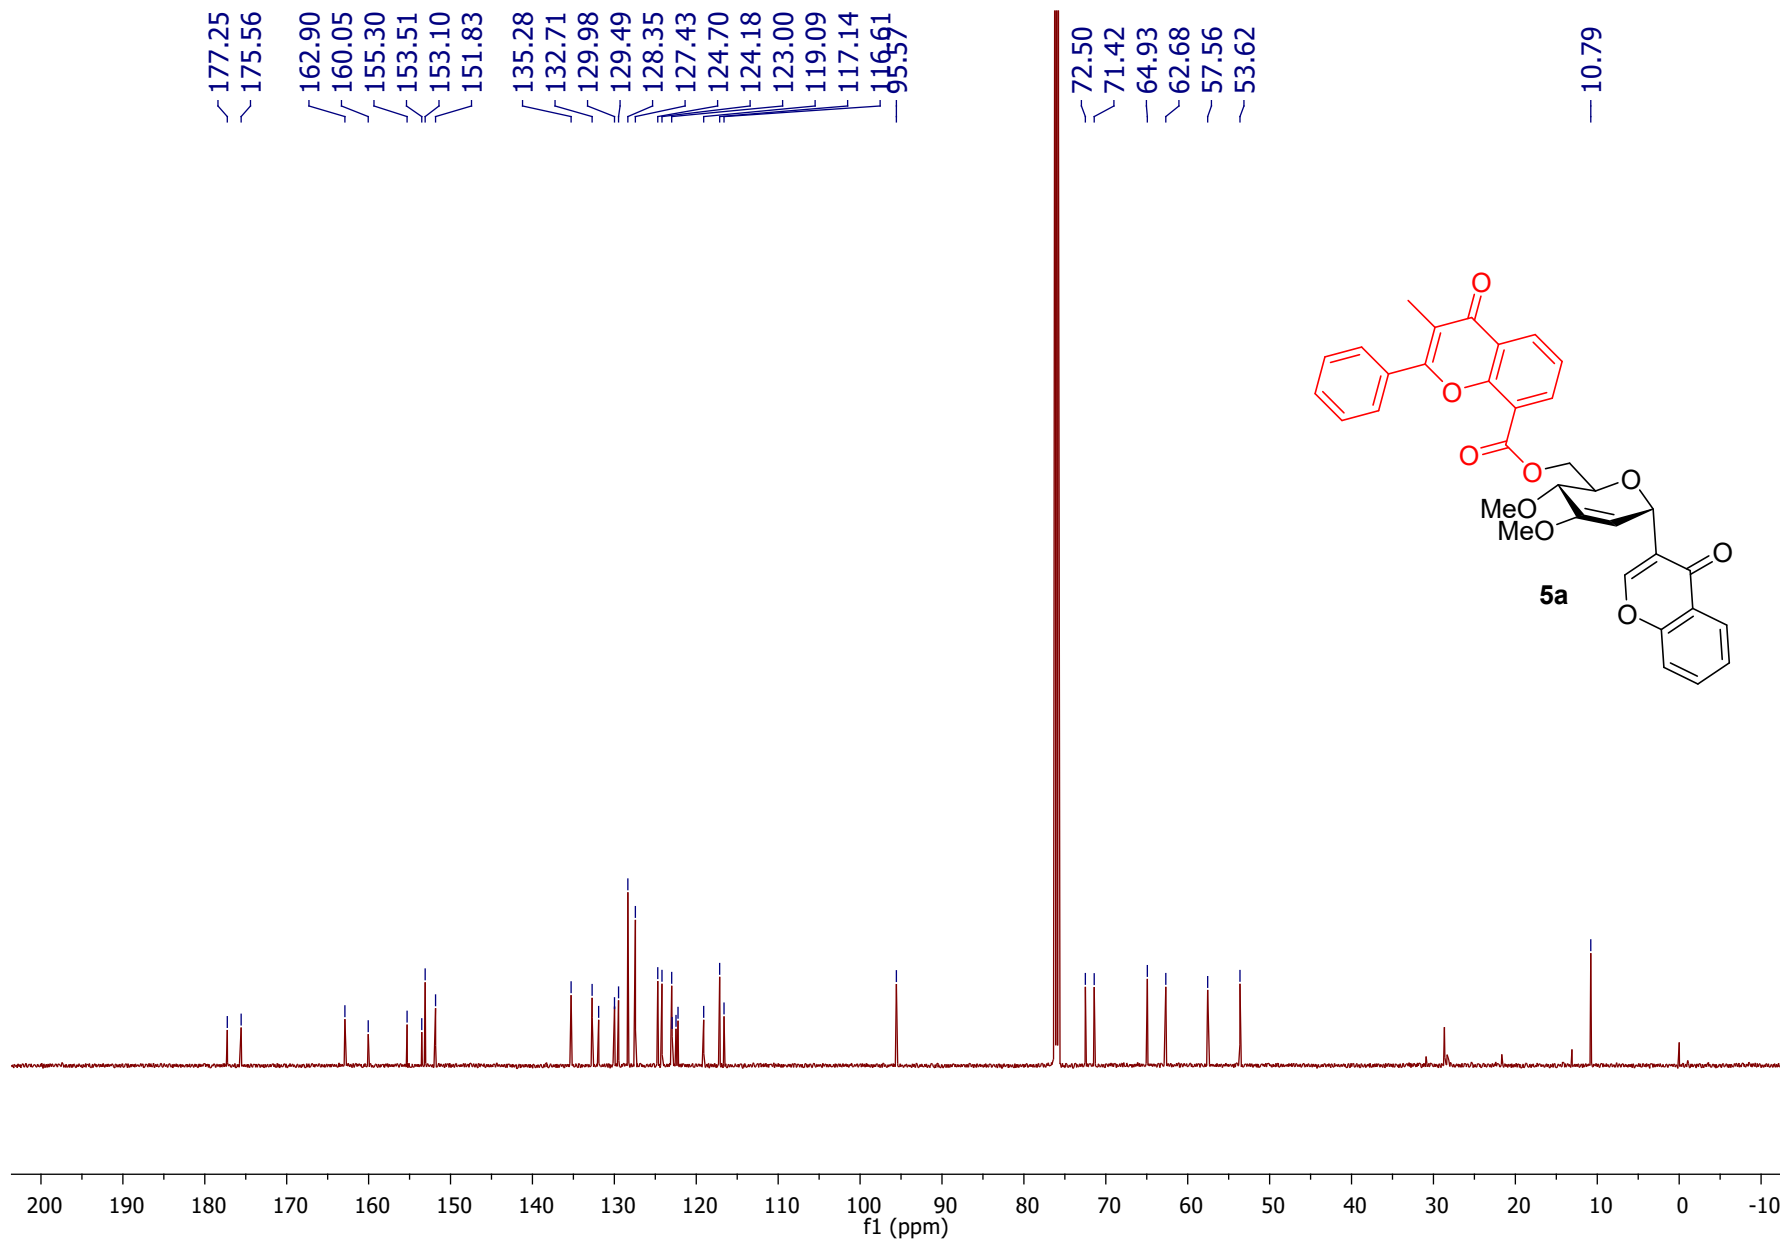

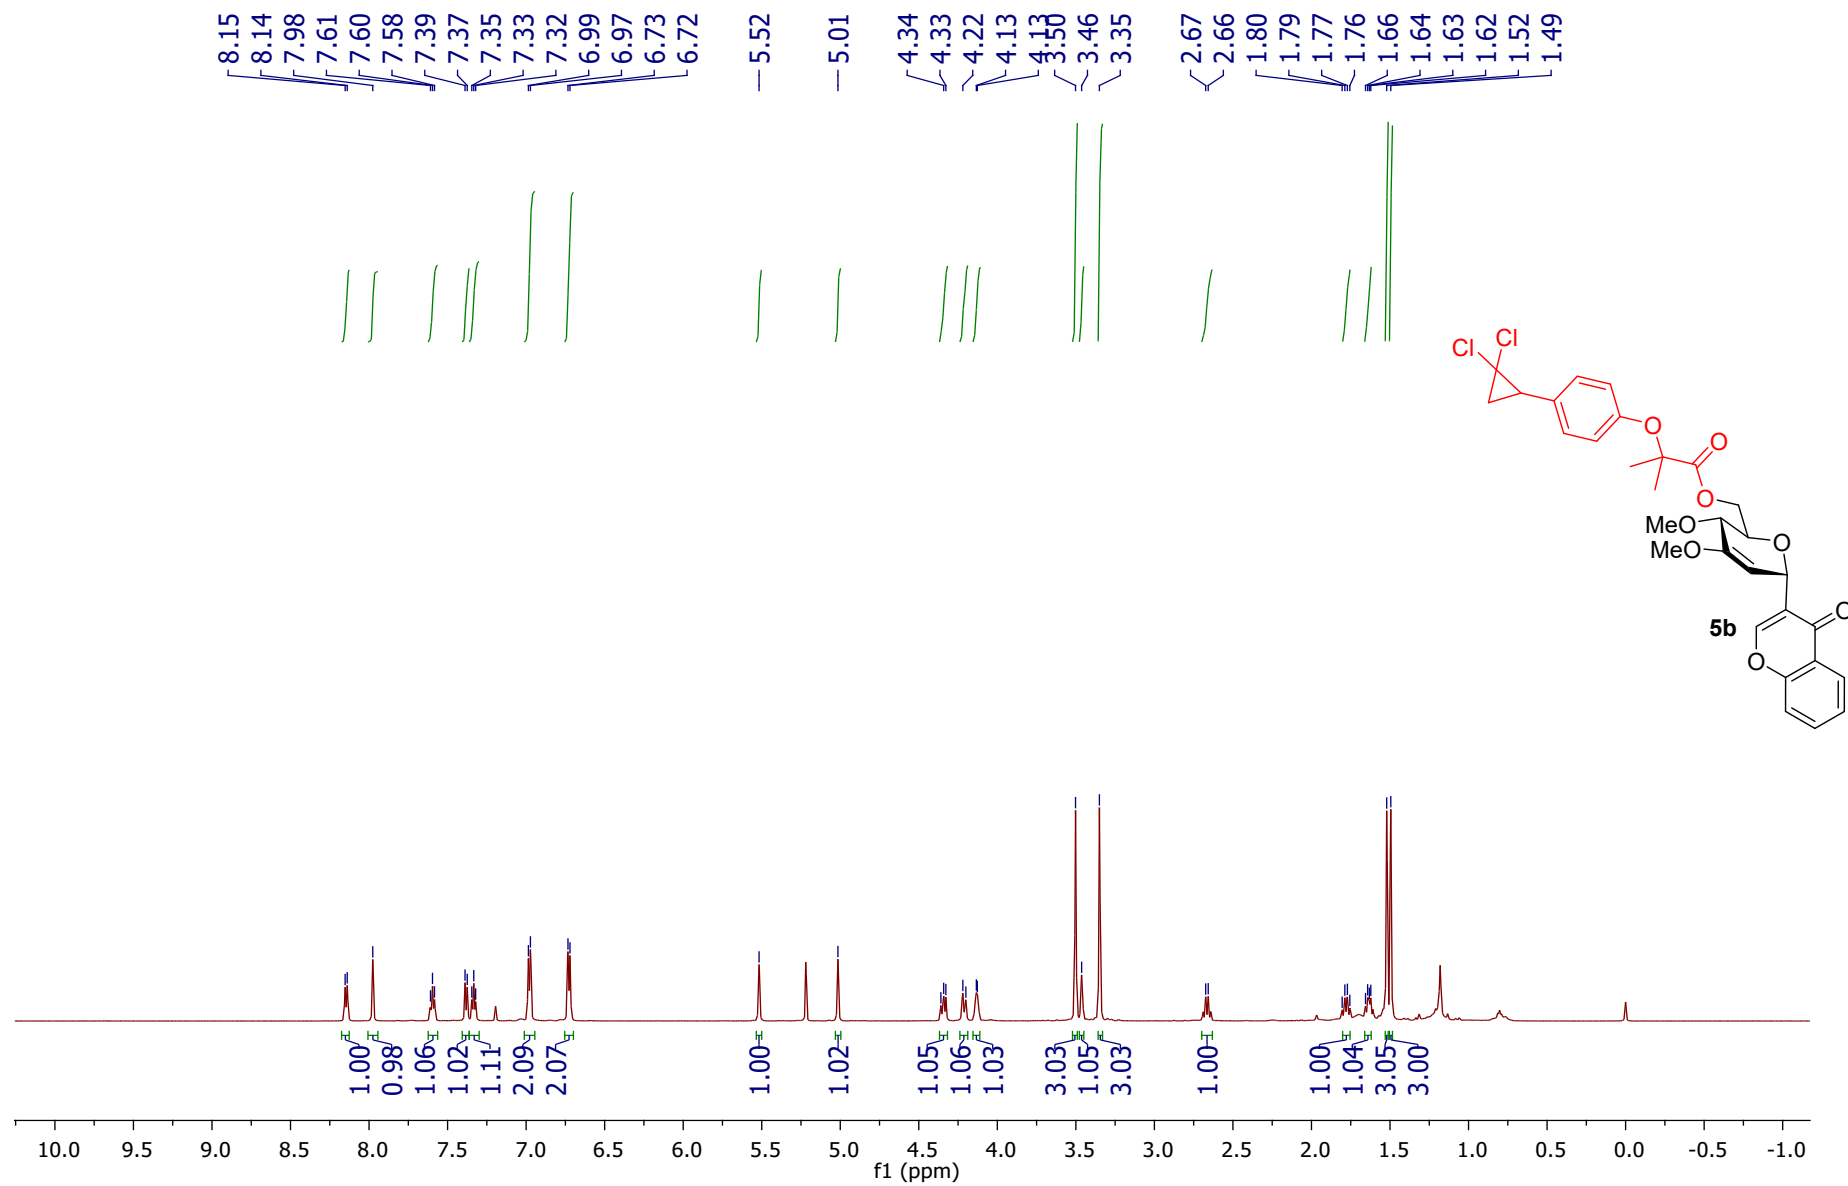

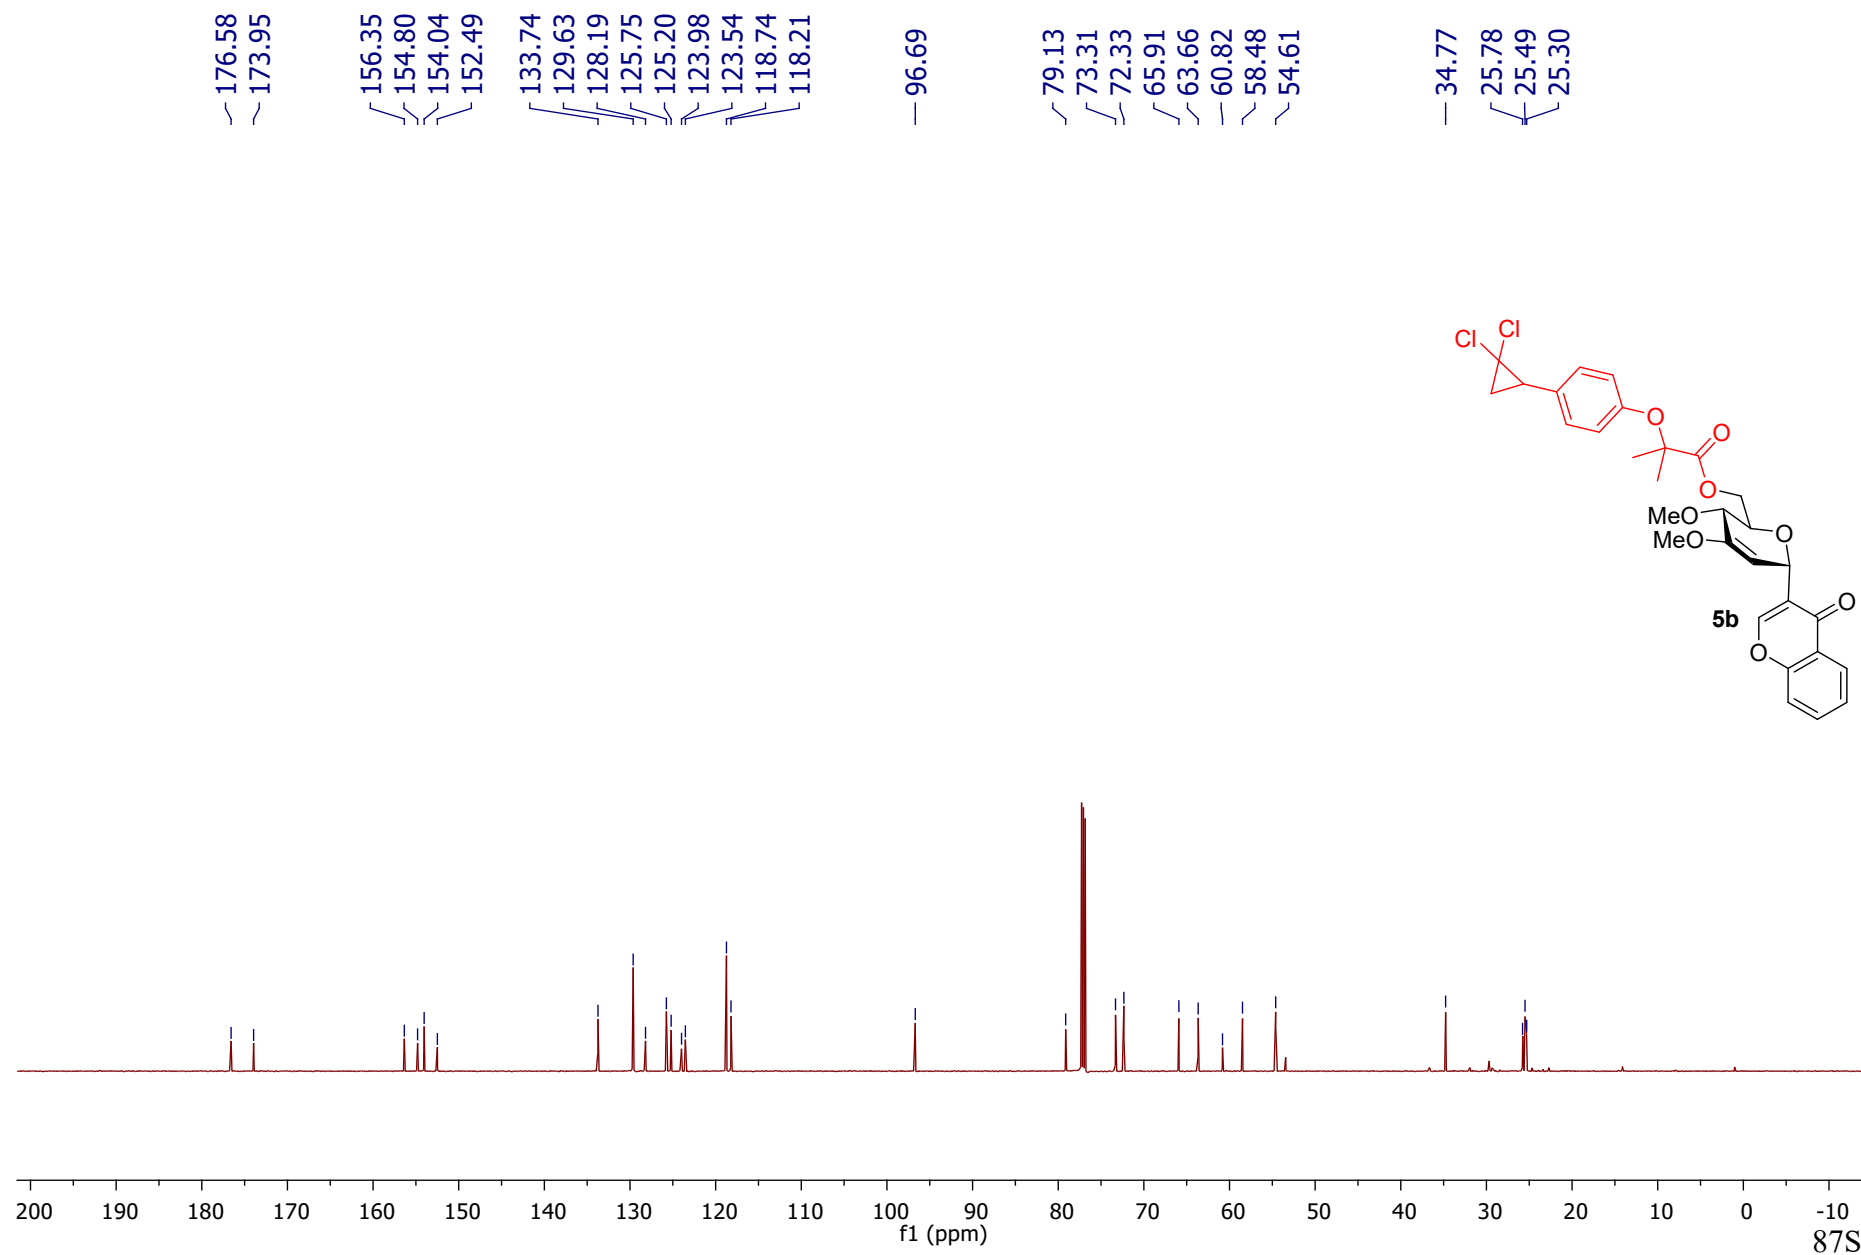

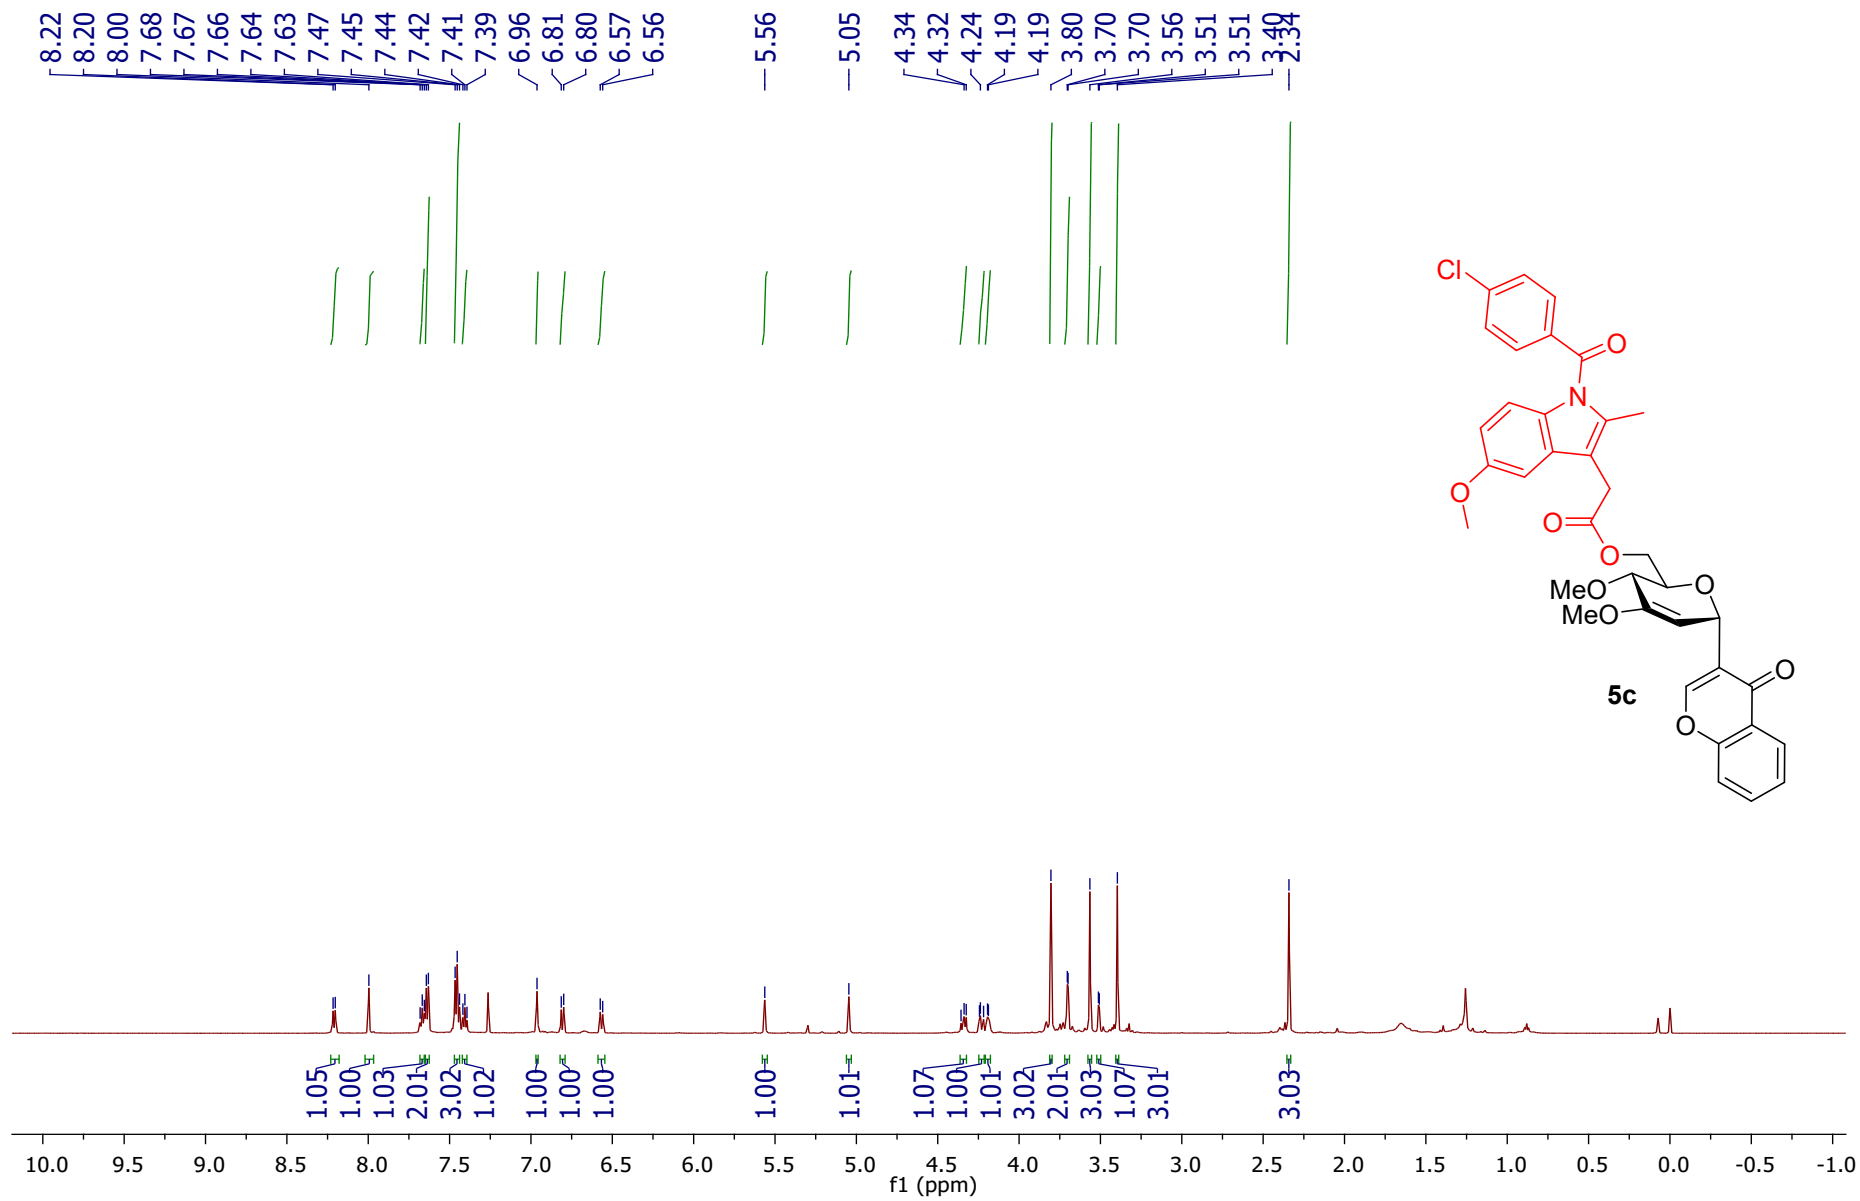



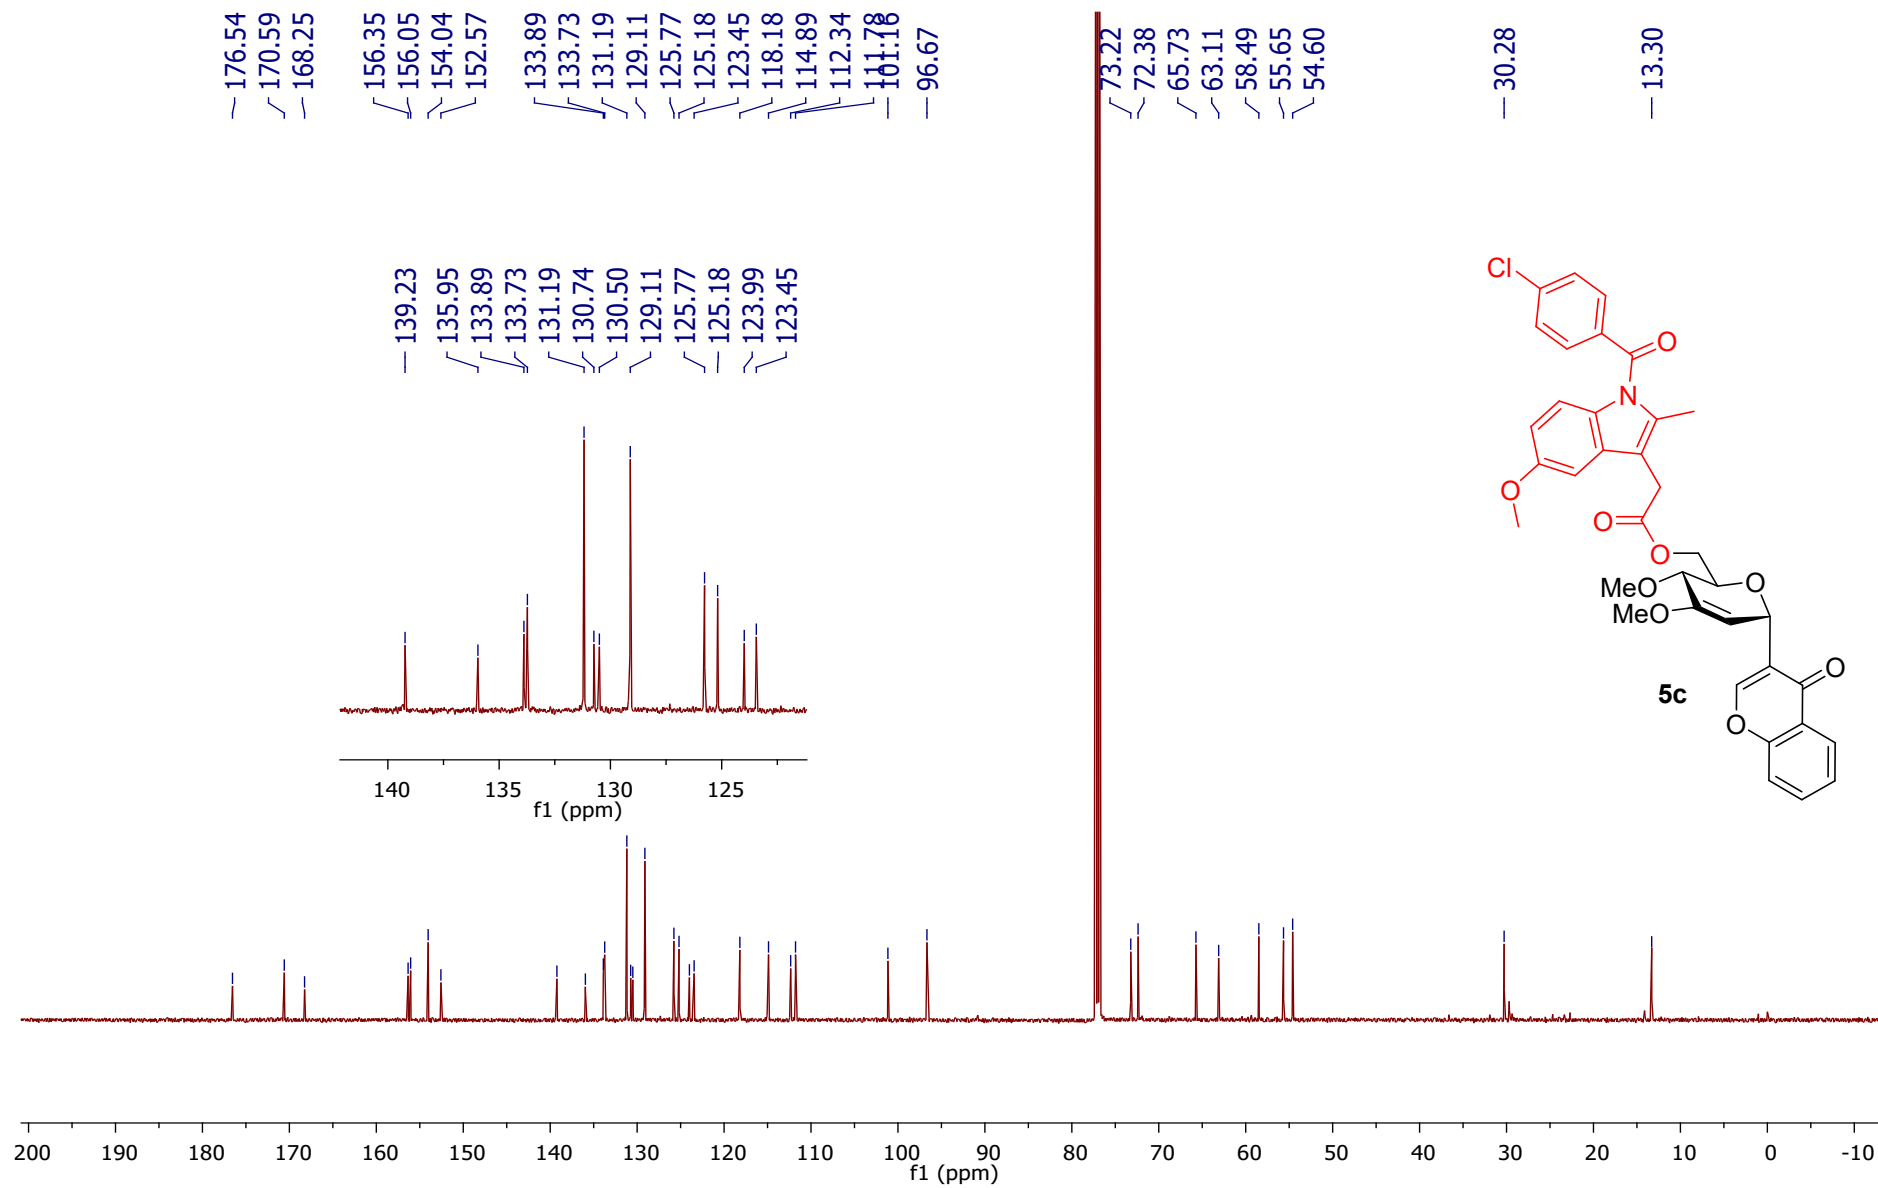

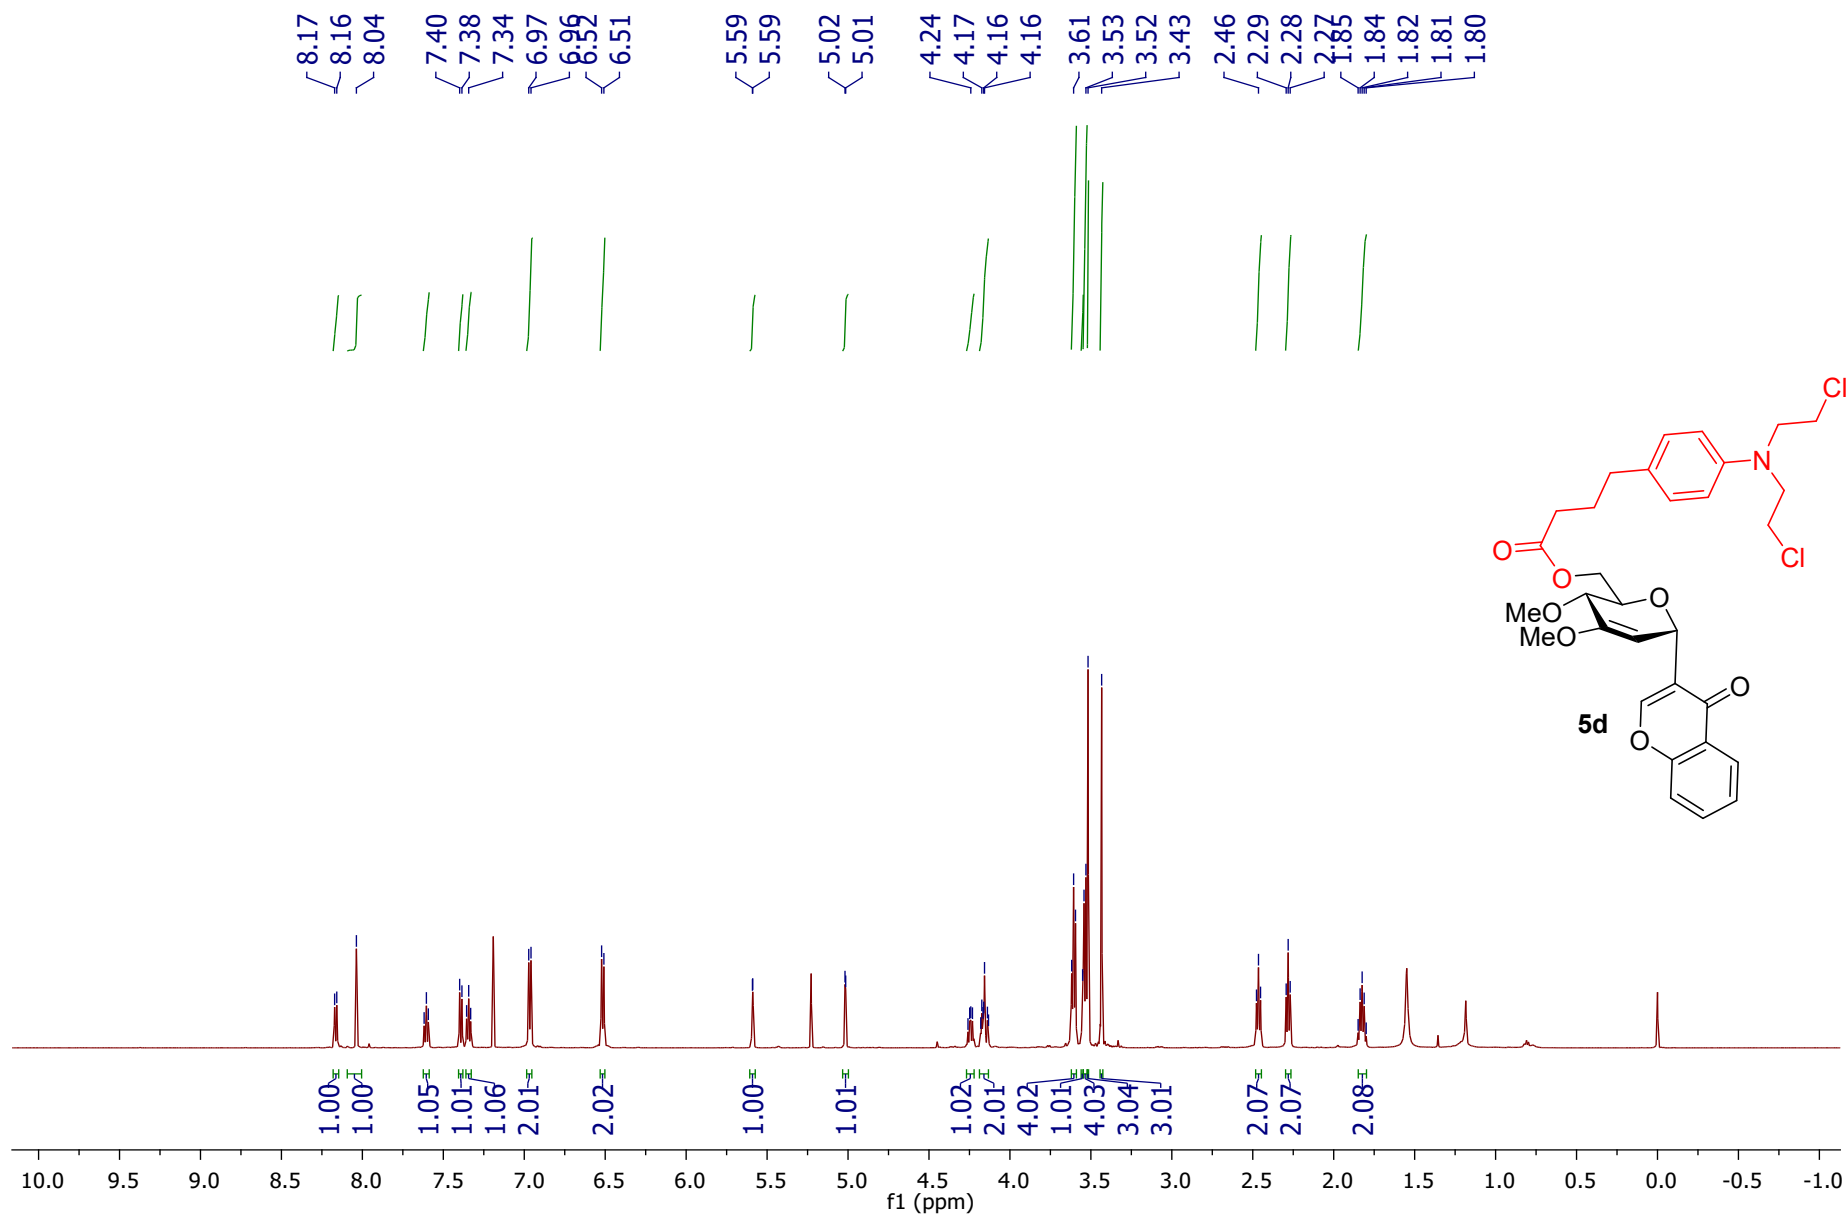

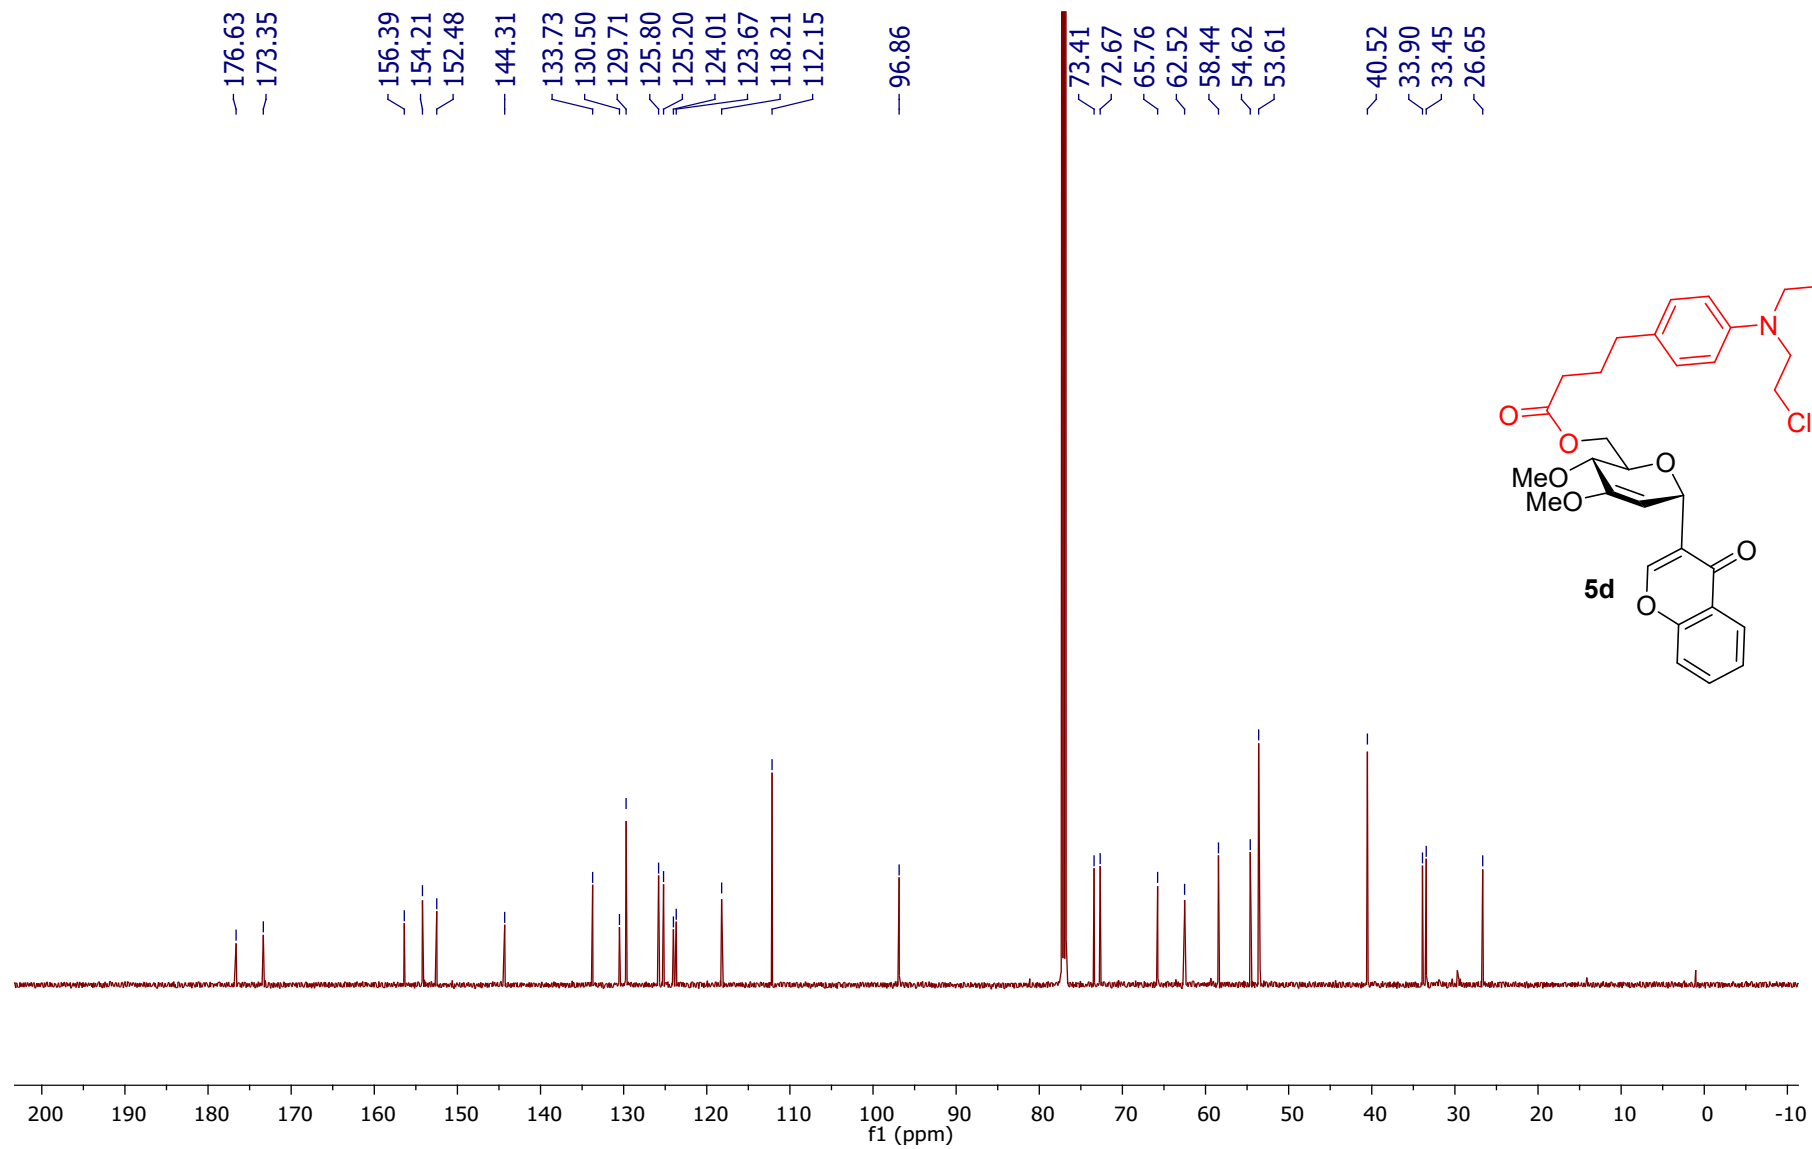

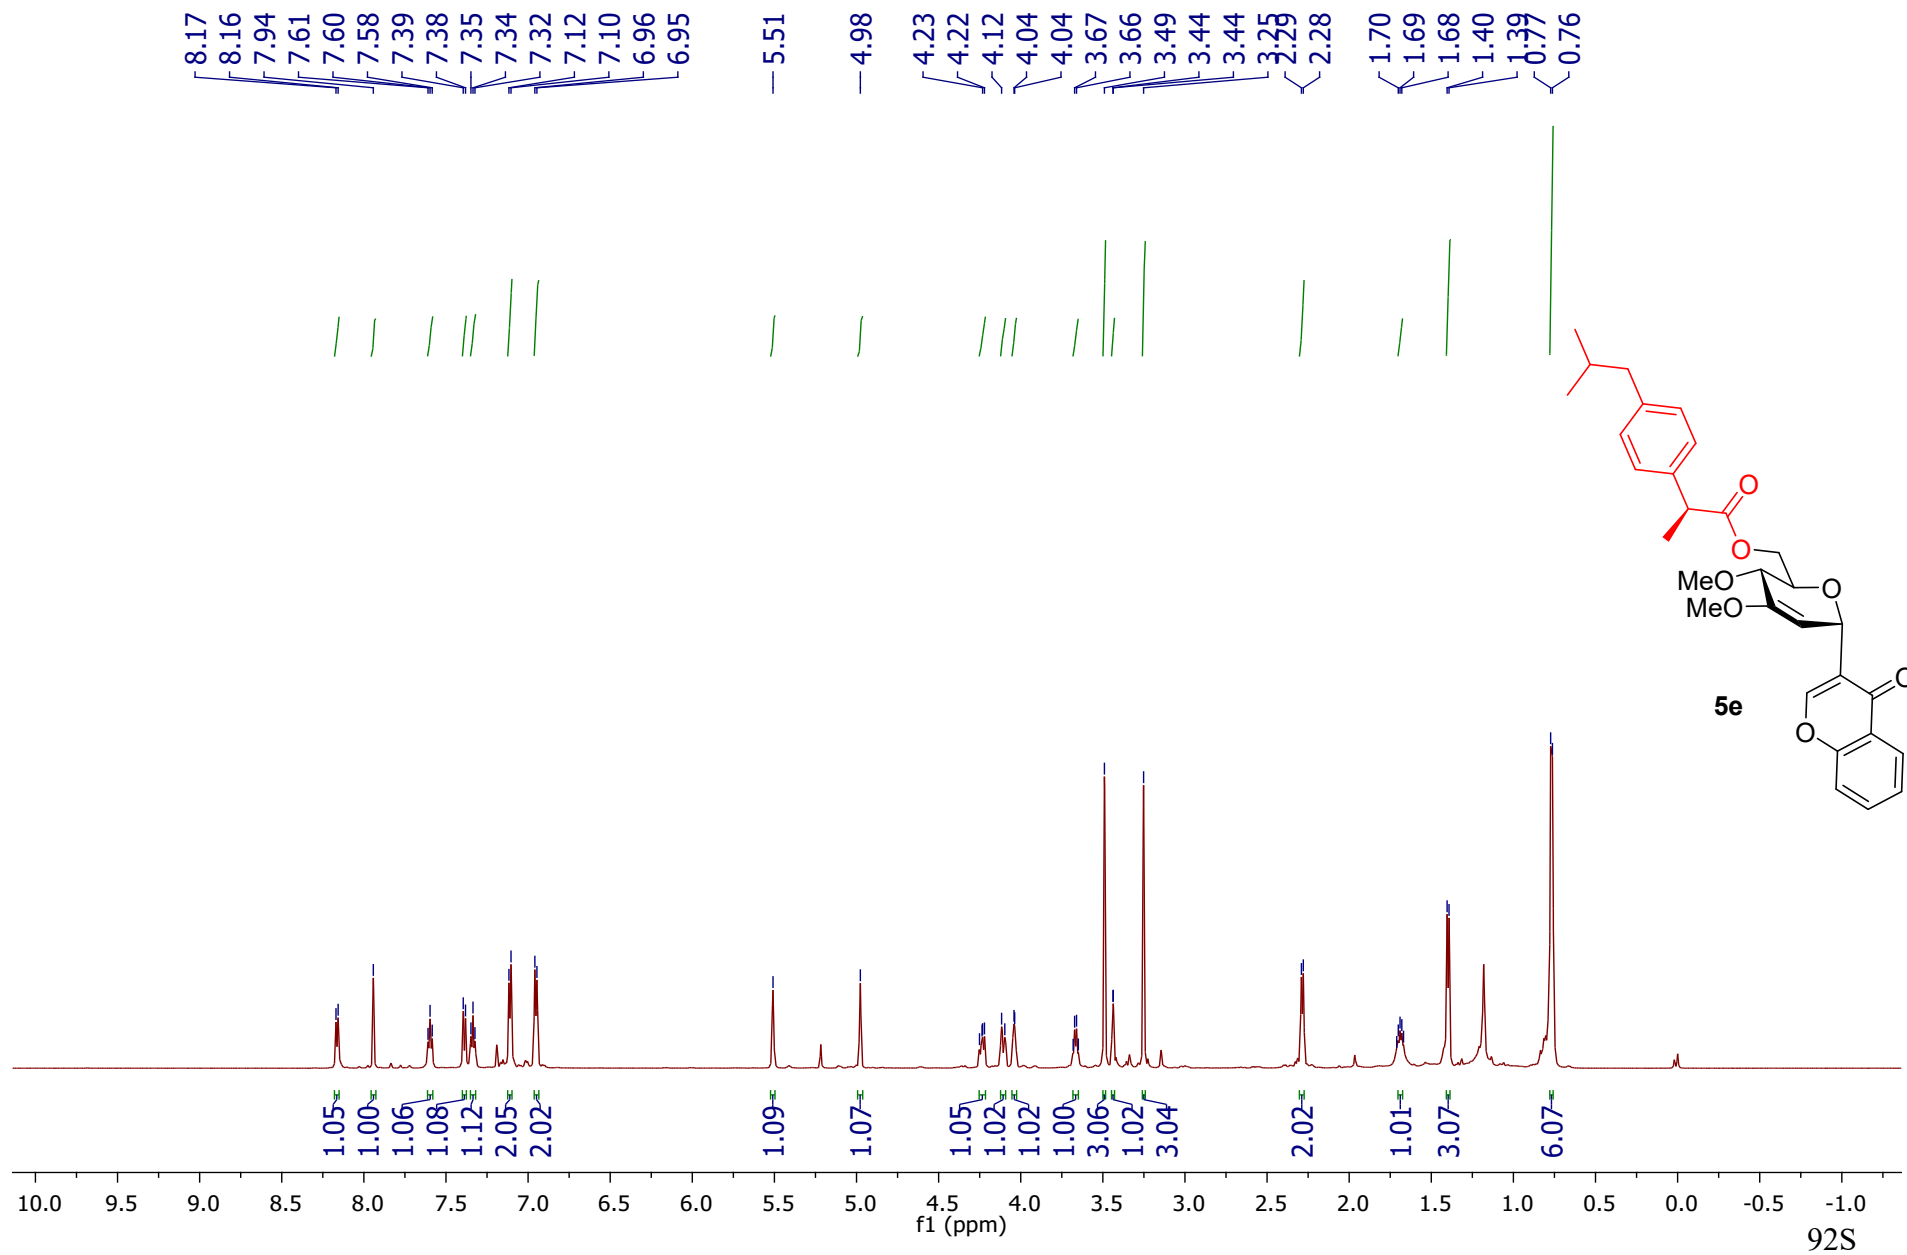

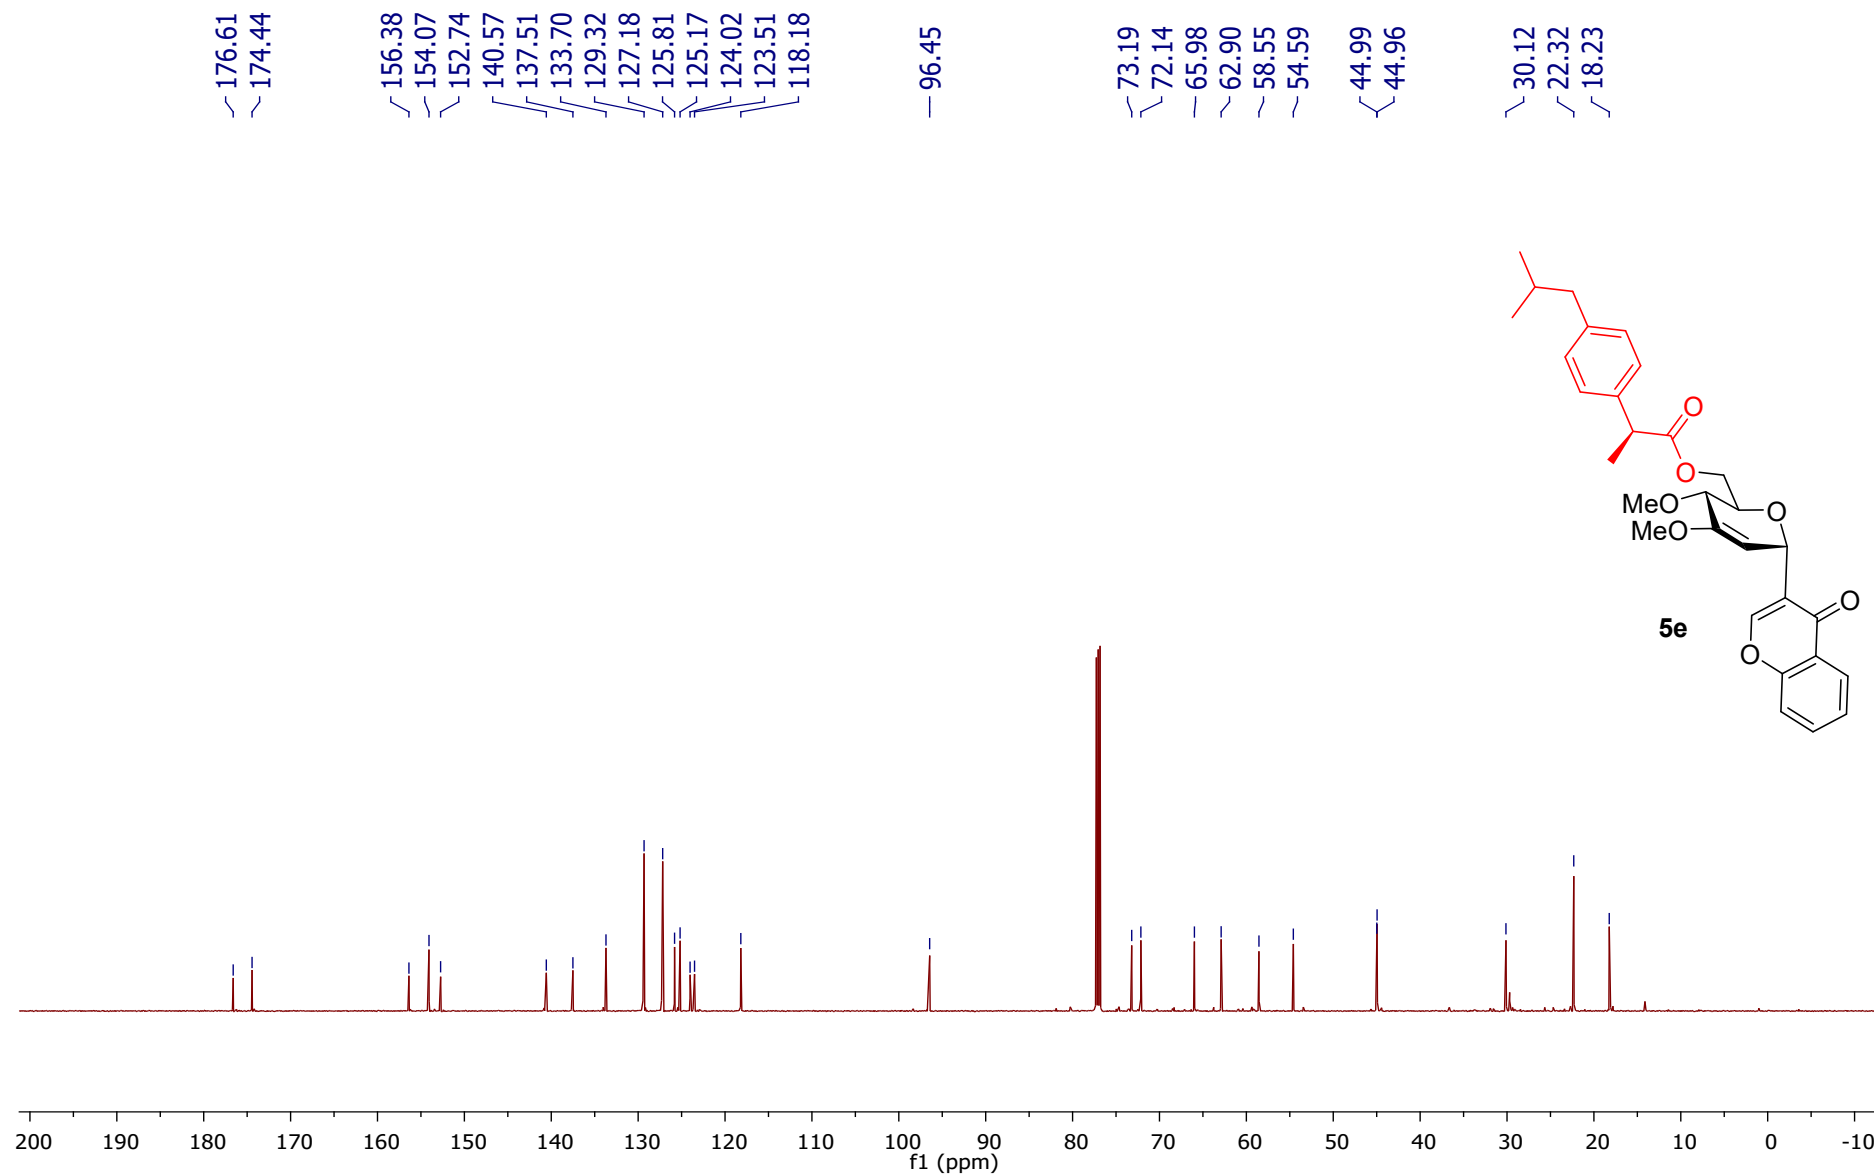

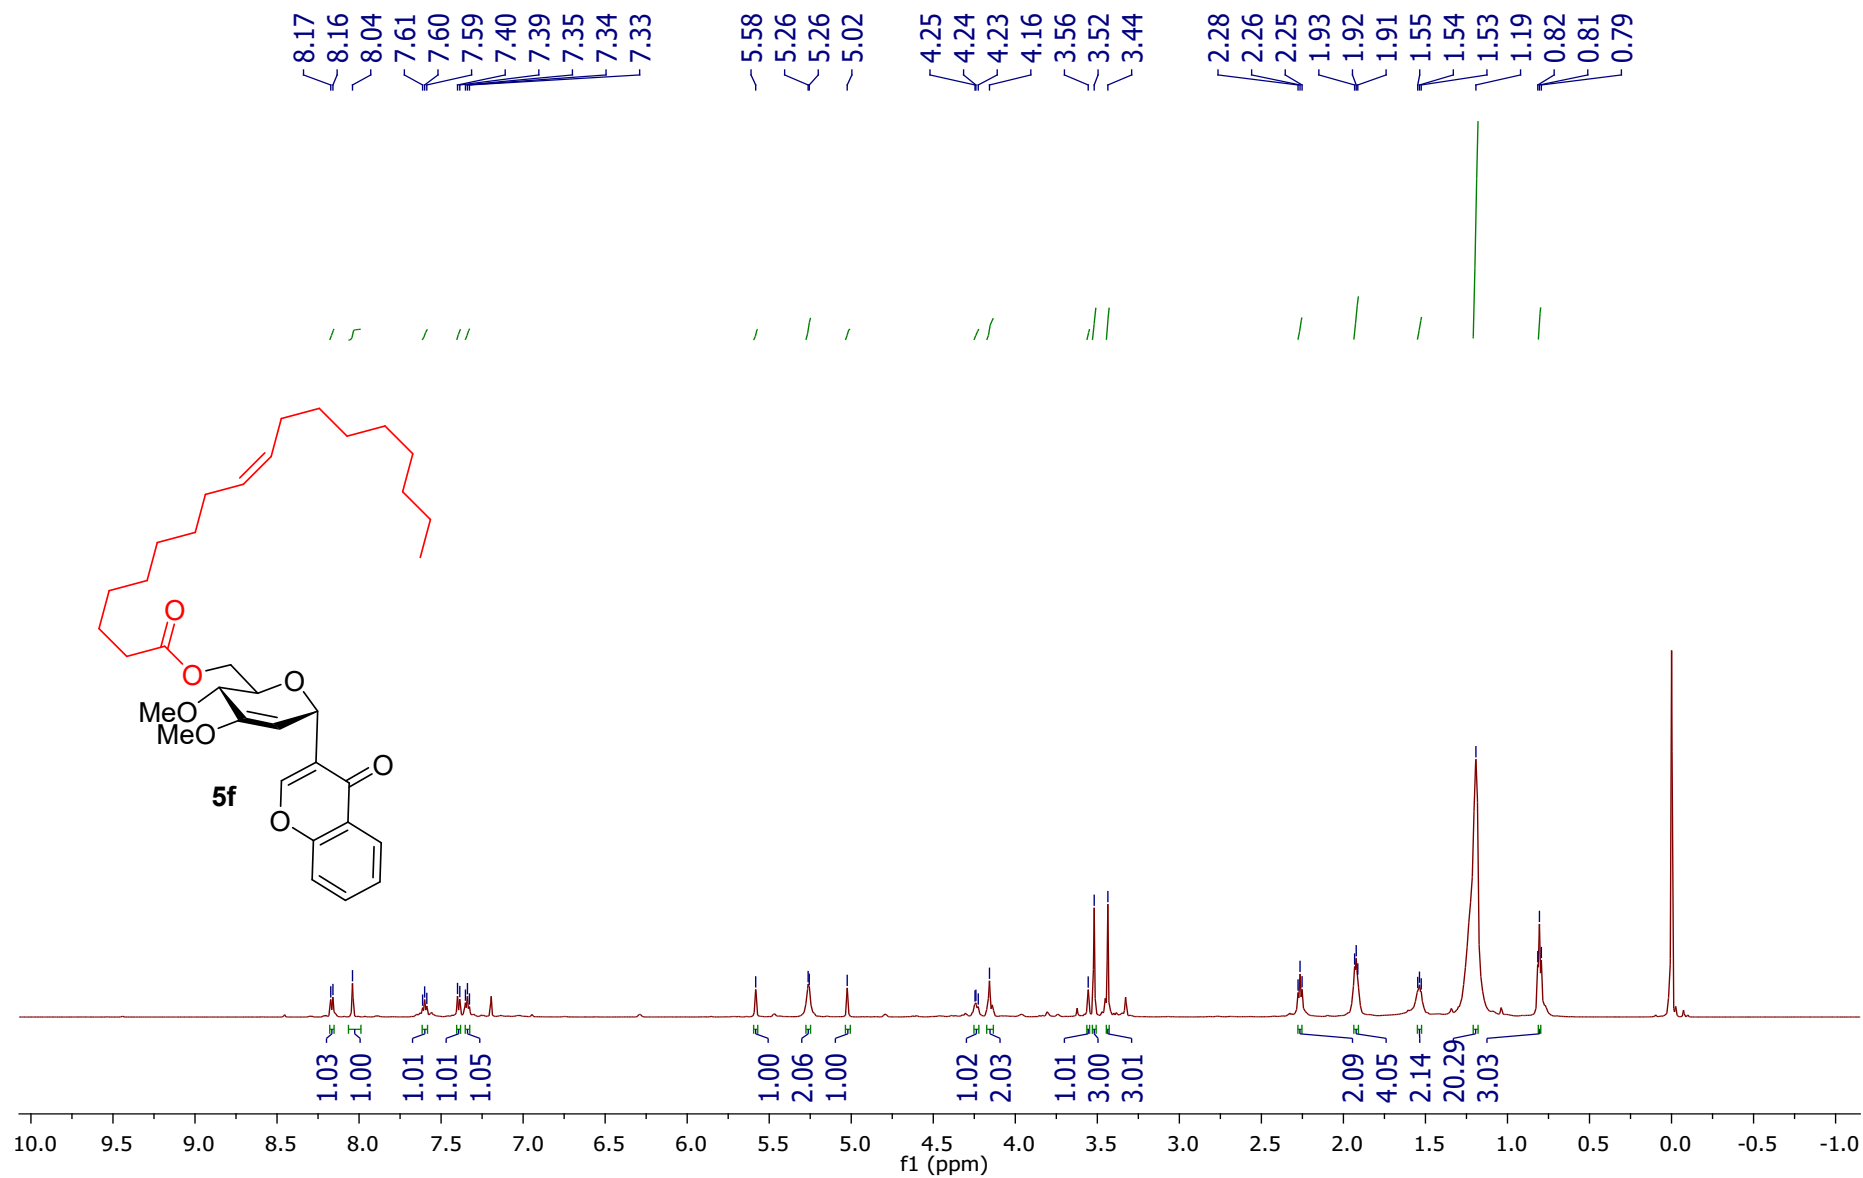

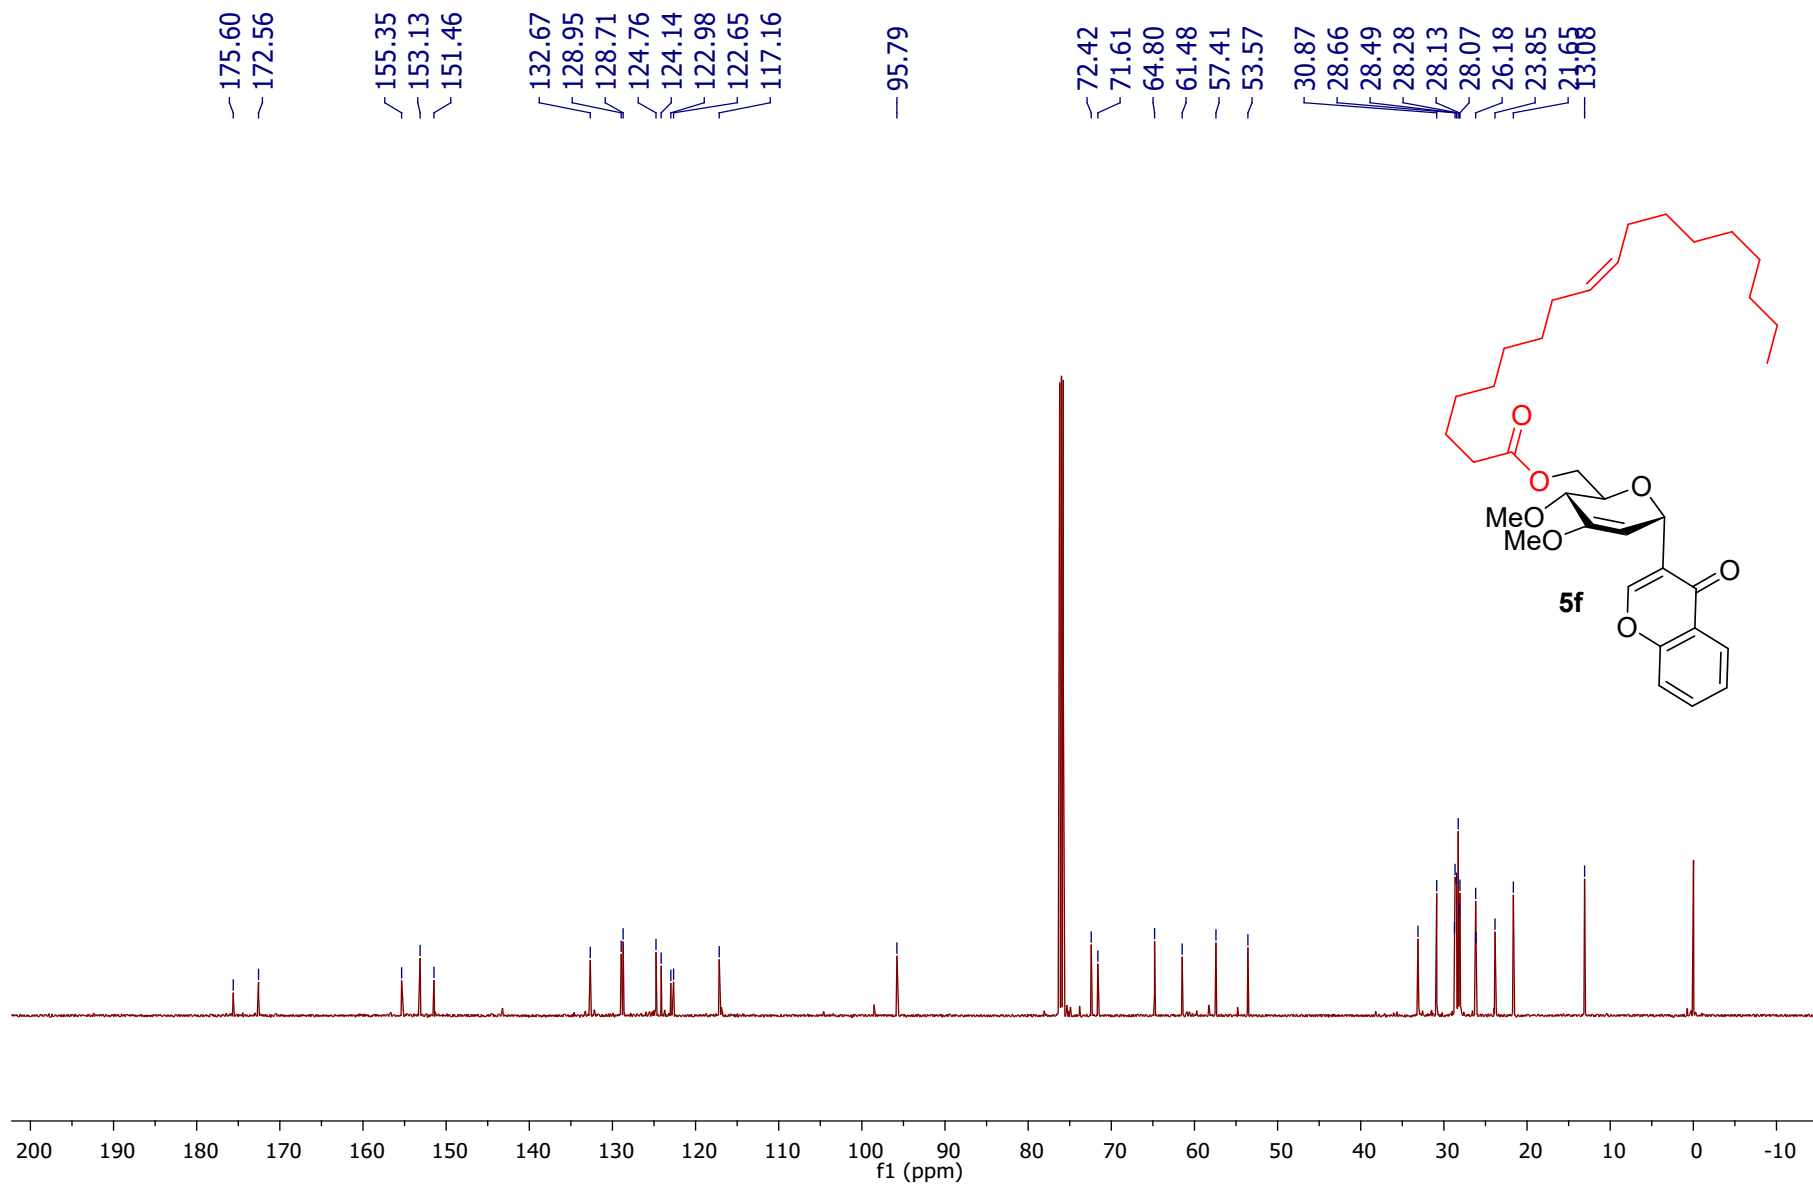

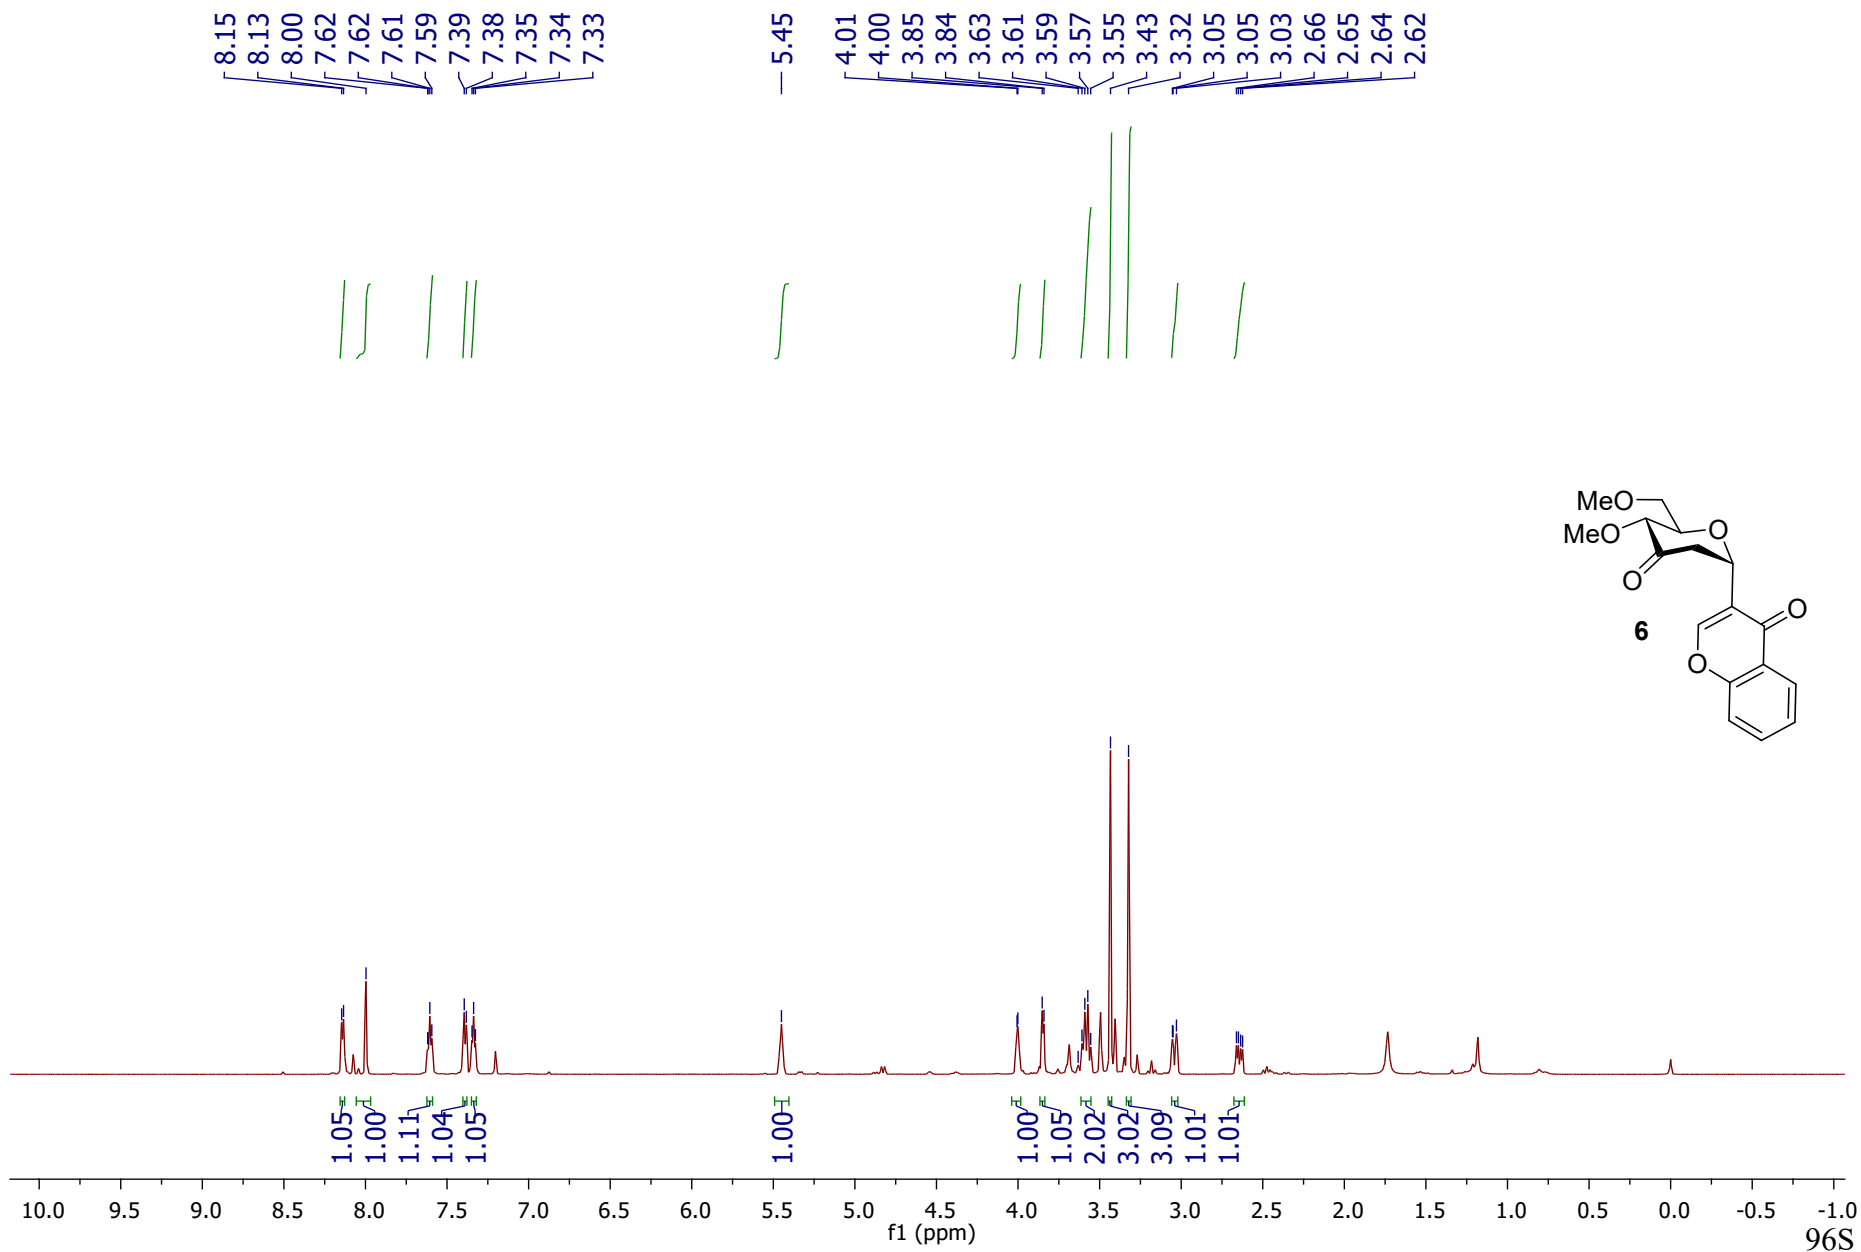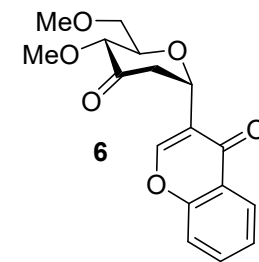



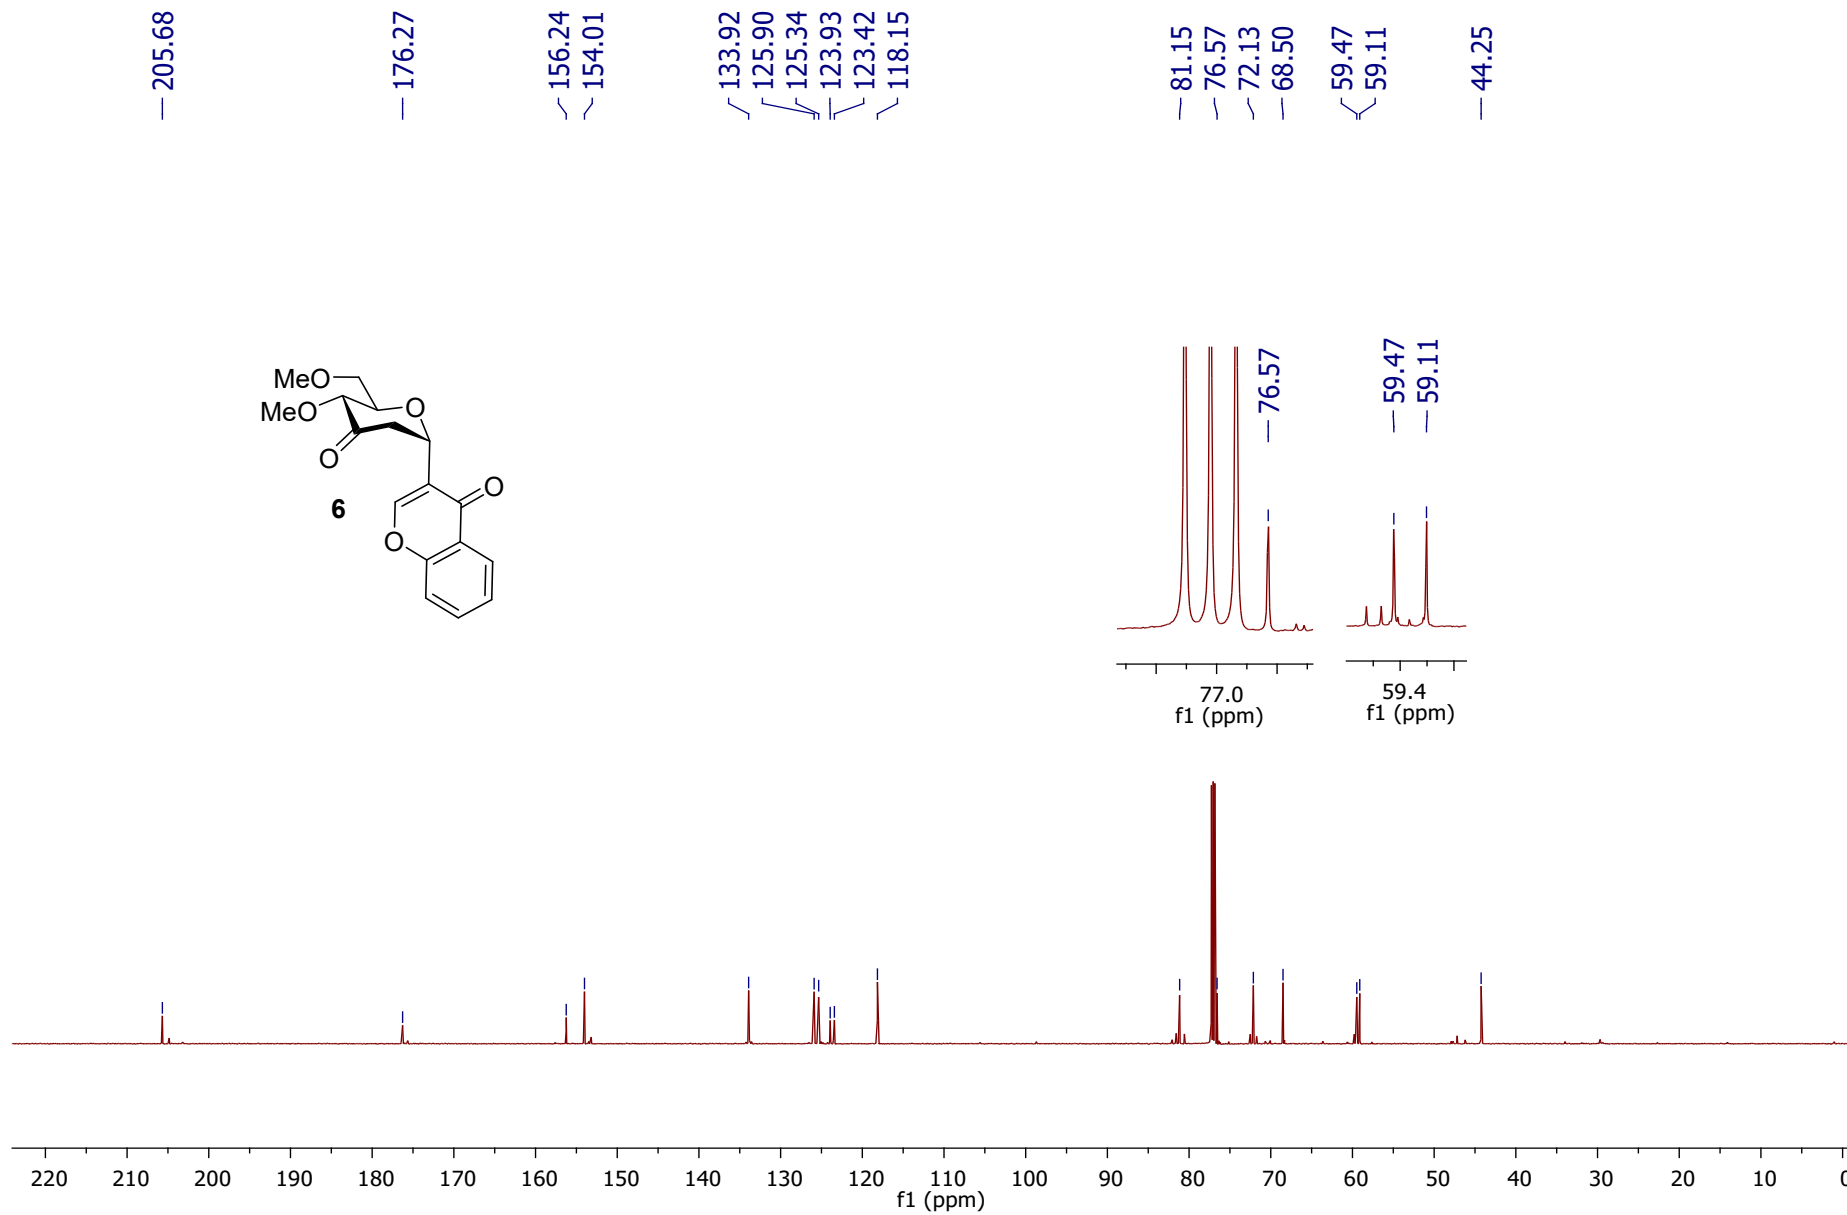

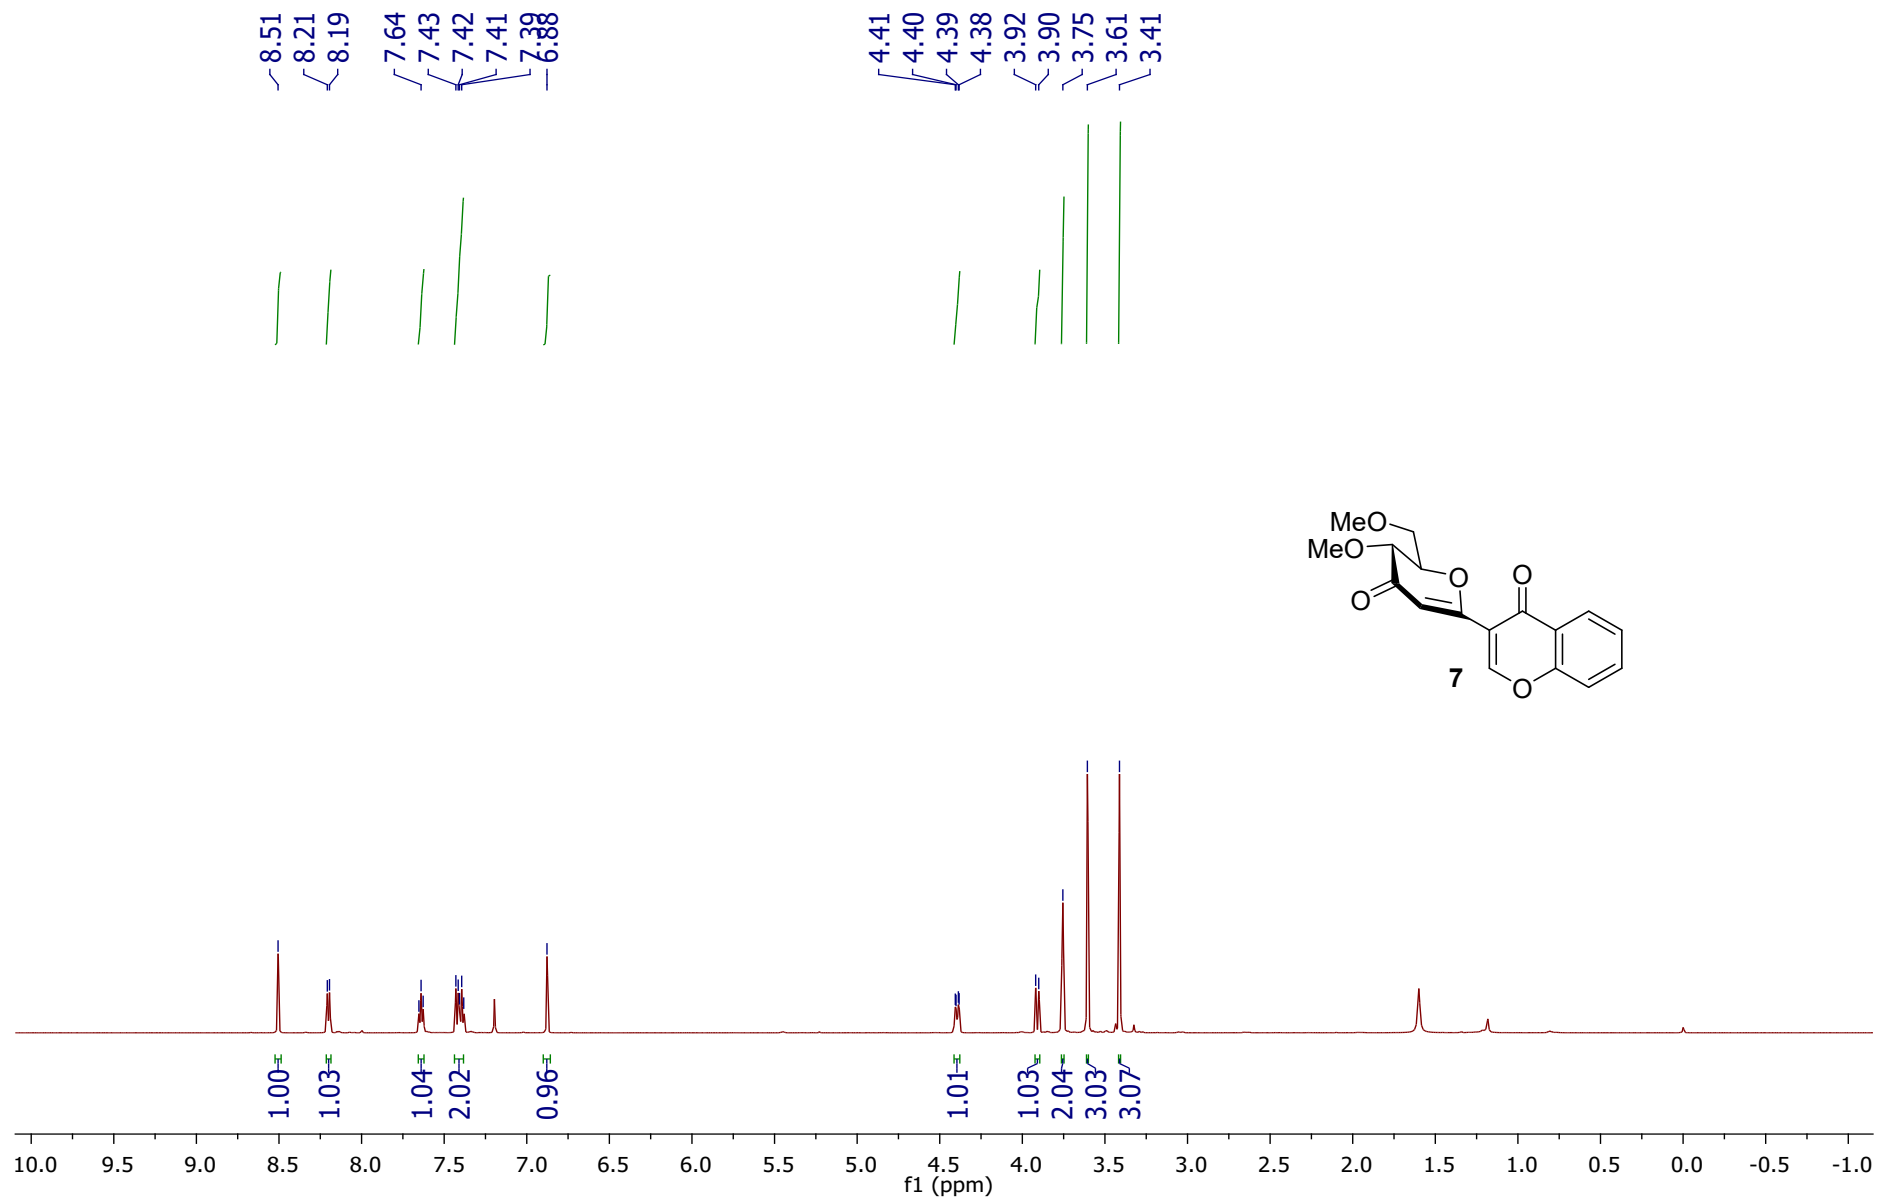

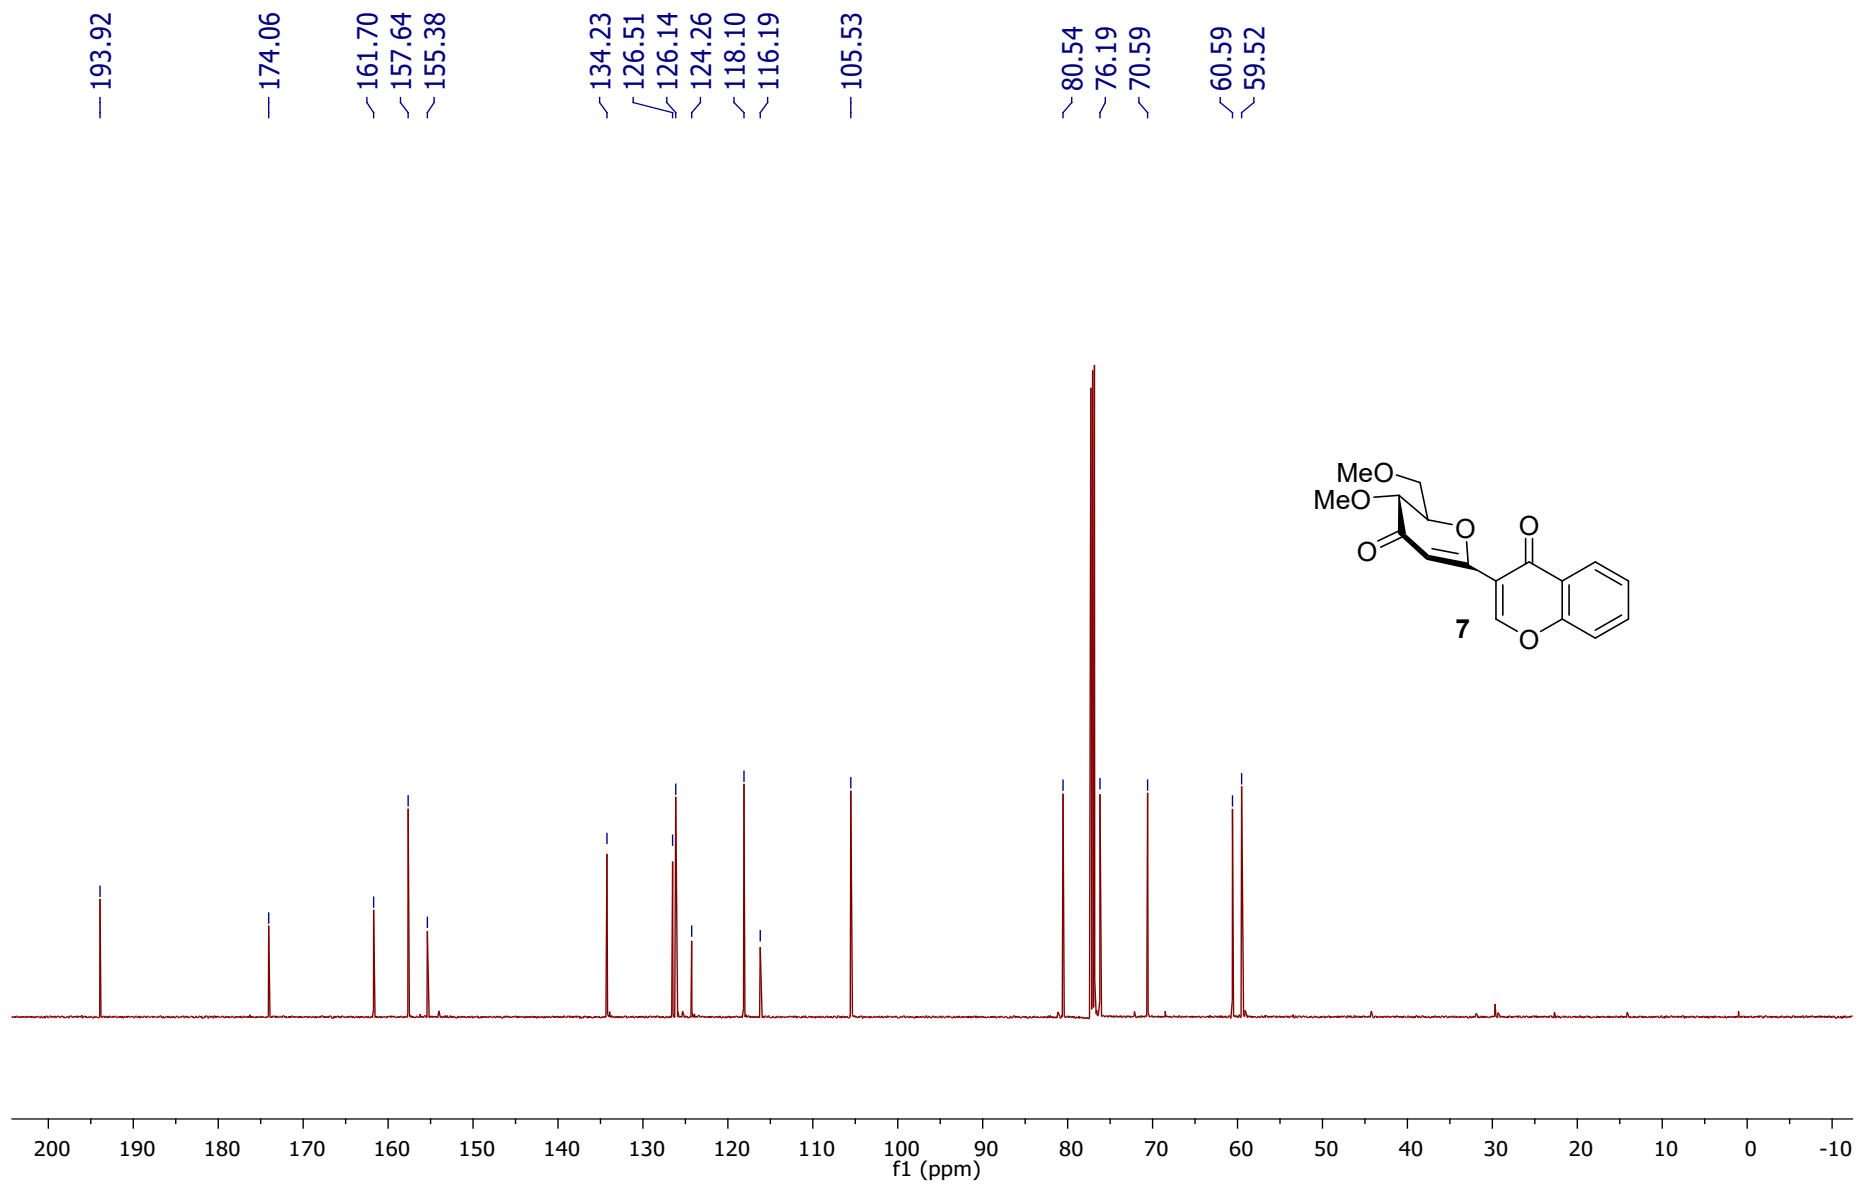

Supplement: d4cc00486h1.pdf [file d4cc00486h1.pdf]
